# Supplementary material for: Unconventional gas-phase synthesis of biphenyl and its atropisomeric methyl-substituted derivatives
Source: Royal Society of Chemistry journal article supplement (doi:10.1039/d4cp00765d), 2024-01-01
Supplement: d4cp00765d1.pdf [file d4cp00765d1.pdf]

Supplementary Information for

**Unconventional Gas-Phase Synthesis of Biphenyl and its Atropisomeric  
Methyl-Substituted Derivatives**

Shane J. Goettl, Chao He, Zhenghai Yang, Ralf I. Kaiser\*, Ankit Somani, Adrian Portela-Gonzalez, Wolfram Sander\*, Bing Jian Sun, Siti Fatimah, Komal Prakash Kadam, Agnes H. H. Chang\*

### Precursor synthesis and characterization

The synthesis of (2-bromoethynyl)benzene was performed analogue to a reported procedure<sup>1</sup> with an increase in the concentration of the starting materials due to the large scale of precursor needed. Regarding the purification, batches performed with less than 10 g of phenylacetylene could be purified by either column chromatography or distillation for both precursors whereas larger batches (20–50 g) decomposed before affording the desired product and, thus, had to be purified by column chromatography. A solution of phenylacetylene (8.0 mL, 7.44 g, 72 mmol) in MeOH (50 mL) was cooled down to 0 °C and KOH (10.0 g, 180 mmol) was added. After 20 min of stirring at 0 °C, N-bromosuccinimide (15.3 g, 86 mmol) was added to the mixture in portions and stirred at 0 °C for 15 min. The cold bath was replaced by a rt water bath and the mixture was stirred for 30 min. Then, Et<sub>2</sub>O (200 mL) was added and the mixture was extracted with brine (3 x 100 mL), dried over MgSO<sub>4</sub>, filtered and evaporated to afford a brown oil/liquid. This liquid was purified by column chromatography (SiO<sub>2</sub>; hexane) to afford the product as a light-yellow oil (9.63 g, 73%). <sup>1</sup>H NMR (200 MHz, CDCl<sub>3</sub>) δ: 7.44 (dd, 2H), 7.31 (m, 3H) ppm. <sup>13</sup>C NMR (50 MHz, CDCl<sub>3</sub>) δ: 132.10, 128.78, 128.44, 122.78, 80.19 and 49.93 ppm. MS: m/z 180.0 [M<sup>+</sup>] 101.1 [M<sup>+</sup>-Br]. The characteristic C≡C stretching vibration was found at 2202 cm<sup>-1</sup> whereas for the starting material it is observed at 2110 cm<sup>-1</sup>. The provided characterization is in accordance with the literature.<sup>2</sup> <sup>1</sup>H and <sup>13</sup>C NMR data were recorded with a Bruker DPX-200 NMR spectrometer referenced towards CDCl<sub>3</sub> (7.26 ppm for <sup>1</sup>H NMR and 77.16 ppm for <sup>13</sup>C NMR). The GC-MS data were recorded with an Agilent 7820A GC spectrometer. IR data were recorded with a Bruker Equinox 55 FT-IR spectrometer.

**Table S1** Peak velocities ( $v_p$ ), speed ratios ( $S$ ), collision energies ( $E_c$ ), and center-of-mass angles ( $\theta_{CM}$ ) for the reactions of phenylethynyl radicals ( $C_6H_5CC$ ) with 1,3-butadiene- $d_6$  ( $C_4D_6$ ), isoprene ( $CH_2C(CH_3)CHCH_2$ ), and 1,3-pentadiene ( $CH_2CHCHCHCH_3$ ).

| Beam                            | $v_p$ (m s <sup>-1</sup> ) | $S$            | $E_c$ (kJ mol <sup>-1</sup> ) | $\theta_{CM}$ (°) |
|---------------------------------|----------------------------|----------------|-------------------------------|-------------------|
| $CD_2CDCDCD_2$ ( $X^1A_g$ )     | $750 \pm 10$               | $8.0 \pm 0.2$  |                               |                   |
| $C_6H_5CC$ ( $X^2A_1$ ) / He    | $1760 \pm 18$              | $9.3 \pm 0.6$  | $68.9 \pm 1.5$                | $15.0 \pm 0.4$    |
| $C_6H_5CC$ ( $X^2A_1$ ) / Ne    | $898 \pm 6$                | $13.5 \pm 1.2$ | $25.8 \pm 0.5$                | $27.1 \pm 0.5$    |
| $CH_2C(CH_3)CHCH_2$ ( $X^1A'$ ) | $721 \pm 20$               | $8.5 \pm 0.6$  |                               |                   |
| $C_6H_5CC$ ( $X^2A_1$ ) / He    | $1749 \pm 10$              | $10.1 \pm 0.6$ | $72.7 \pm 1.3$                | $16.3 \pm 0.5$    |
| $C_6H_5CC$ ( $X^2A_1$ ) / Ne    | $895 \pm 9$                | $14.3 \pm 1.2$ | $26.8 \pm 0.6$                | $29.2 \pm 0.6$    |
| $CH_2CHCHCHCH_3$ ( $X^1A'$ )    | $711 \pm 20$               | $8.5 \pm 0.7$  |                               |                   |
| $C_6H_5CC$ ( $X^2A_1$ ) / He    | $1778 \pm 13$              | $10.2 \pm 0.6$ | $74.5 \pm 1.5$                | $15.8 \pm 0.5$    |
| $C_6H_5CC$ ( $X^2A_1$ ) / Ne    | $898 \pm 8$                | $14.6 \pm 1.0$ | $26.7 \pm 0.9$                | $28.8 \pm 0.9$    |

**Table S2** RRKM rate constants ( $s^{-1}$ ) for the reaction of phenylethynyl radicals with 1,3-butadiene- $d_6$  computed with  $wB97X-D/cc-pVTZ$  zero-point energy corrected CCSD(T)/ $cc-pVTZ$  energies, and  $wB97X-D/cc-pVTZ$  harmonic frequencies at collision energies of 0.0, 25.8, and 68.9  $\text{kJ mol}^{-1}$  relative to the entrance channel.

|                                     | <b>0</b>              | <b>25.8</b>           | <b>68.9</b>        |
|-------------------------------------|-----------------------|-----------------------|--------------------|
| $k_1$<br>(i1 $\rightarrow$ i3)      | $2.93 \times 10^5$    | $7.16 \times 10^5$    | $2.43 \times 10^6$ |
| $k_{-1}$<br>(i3 $\rightarrow$ i1)   | $7.32 \times 10^6$    | $2.17 \times 10^7$    | $9.72 \times 10^7$ |
| $k_2$<br>(i1 $\rightarrow$ i2)      | $2.71 \times 10^{-3}$ | $6.96 \times 10^{-2}$ | 3.60               |
| $k_{-2}$<br>(i2 $\rightarrow$ i1)   | $1.21 \times 10^{-1}$ | 2.65                  | $1.10 \times 10^2$ |
| $k_3$<br>(i1 $\rightarrow$ p2+D)    | 2.78                  | $4.08 \times 10^1$    | $1.19 \times 10^3$ |
| $k_4$<br>(i2 $\rightarrow$ p2+D)    | $1.37 \times 10^3$    | $1.19 \times 10^4$    | $1.85 \times 10^5$ |
| $k_5$<br>(i2 $\rightarrow$ i4)      | $4.49 \times 10^9$    | $5.61 \times 10^9$    | $7.63 \times 10^9$ |
| $k_{-5}$<br>(i4 $\rightarrow$ i2)   | $2.83 \times 10^4$    | $8.47 \times 10^4$    | $4.12 \times 10^5$ |
| $k_6$<br>(i3 $\rightarrow$ i4)      | $1.45 \times 10^4$    | $5.77 \times 10^4$    | $3.79 \times 10^5$ |
| $k_{-6}$<br>(i4 $\rightarrow$ i3)   | $8.22 \times 10^{-2}$ | $5.50 \times 10^{-1}$ | 7.81               |
| $k_7$<br>(i4 $\rightarrow$ p1+D)    | $3.67 \times 10^8$    | $5.99 \times 10^8$    | $1.24 \times 10^9$ |
| $k_{36}$<br>(i1 $\rightarrow$ i21)  | $1.32 \times 10^7$    | $2.75 \times 10^7$    | $7.62 \times 10^7$ |
| $k_{-36}$<br>(i21 $\rightarrow$ i1) | $1.17 \times 10^7$    | $3.00 \times 10^7$    | $1.12 \times 10^8$ |

---

|                                             |                       |                       |                       |
|---------------------------------------------|-----------------------|-----------------------|-----------------------|
| $k_{37}$<br>(i21 → i22)                     | $8.27 \times 10^{-2}$ | $8.24 \times 10^{-1}$ | $1.66 \times 10^1$    |
| $k_{-37}$<br>(i22 → i21)                    | $7.39 \times 10^{-5}$ | $1.13 \times 10^{-3}$ | $4.31 \times 10^{-2}$ |
| $k_{38}$<br>(i22 → p10+D)                   | $5.57 \times 10^4$    | $1.67 \times 10^5$    | $8.06 \times 10^6$    |
| $k_{49}$<br>(i28 → i29)                     | $1.38 \times 10^8$    | $2.69 \times 10^8$    | $6.52 \times 10^8$    |
| $k_{-49}$<br>(i29 → i28)                    | $4.51 \times 10^{10}$ | $7.26 \times 10^{10}$ | $1.35 \times 10^{11}$ |
| $k_{50}$<br>(i29 → i1)                      | $7.92 \times 10^{11}$ | $9.77 \times 10^{11}$ | $1.29 \times 10^{12}$ |
| $k_{-50}$<br>(i1 → i29)                     | $1.31 \times 10^6$    | $3.18 \times 10^6$    | $1.07 \times 10^7$    |
| $k_{59}$<br>(i2 → p13 +<br>phenylacetylene) | 3.24                  |                       |                       |

---

**Table S3** RRKM rate constants ( $s^{-1}$ ) for the reaction of phenylethynyl radicals with isoprene computed with  $wB97X-D/cc-pVTZ$  zero-point energy corrected CCSD(T)/ $cc-pVTZ$  energies, and  $wB97X-D/cc-pVTZ$  harmonic frequencies at collision energies of 0.0, 26.8 and 72.7  $\text{kJ mol}^{-1}$  relative to the entrance channel.

|                                     | 0.0                   | 26.8                  | 72.7                  |
|-------------------------------------|-----------------------|-----------------------|-----------------------|
| $k_8$<br>(i5 $\rightarrow$ i7)      | $1.41 \times 10^5$    | $3.50 \times 10^5$    | $1.24 \times 10^6$    |
| $k_{-8}$<br>(i7 $\rightarrow$ i5)   | $4.47 \times 10^6$    | $1.44 \times 10^7$    | $7.49 \times 10^7$    |
| $k_9$<br>(i5 $\rightarrow$ i6)      | $2.36 \times 10^{-3}$ | $6.03 \times 10^{-2}$ | 3.29                  |
| $k_{-9}$<br>(i6 $\rightarrow$ i5)   | 2.32                  | $4.63 \times 10^1$    | $1.78 \times 10^3$    |
| $k_{10}$<br>(i5 $\rightarrow$ p4+H) | $2.21 \times 10^{-1}$ | 3.53                  | $1.20 \times 10^2$    |
| $k_{11}$<br>(i5 $\rightarrow$ p4+H) | $9.40 \times 10^1$    | $1.44 \times 10^3$    | $4.29 \times 10^4$    |
| $k_{12}$<br>(i6 $\rightarrow$ i8)   | $3.62 \times 10^{11}$ | $3.95 \times 10^{11}$ | $4.45 \times 10^{11}$ |
| $k_{-12}$<br>(i8 $\rightarrow$ i6)  | $1.08 \times 10^4$    | $3.39 \times 10^4$    | $1.84 \times 10^5$    |
| $k_{13}$<br>(i7 $\rightarrow$ i8)   | $2.35 \times 10^4$    | $9.02 \times 10^4$    | $5.89 \times 10^5$    |
| $k_{-13}$<br>(i8 $\rightarrow$ i7)  | $4.33 \times 10^{-2}$ | $2.89 \times 10^{-1}$ | 4.35                  |
| $k_{14}$<br>(i8 $\rightarrow$ p3+H) | $4.77 \times 10^8$    | $7.79 \times 10^8$    | $1.64 \times 10^9$    |
| $k_{39}$<br>(i5 $\rightarrow$ i23)  | $9.68 \times 10^6$    | $1.96 \times 10^7$    | $5.27 \times 10^7$    |

---

|                           |                       |                       |                       |
|---------------------------|-----------------------|-----------------------|-----------------------|
| $k_{-39}$<br>(i23 → i5)   | $5.15 \times 10^6$    | $1.39 \times 10^7$    | $5.73 \times 10^7$    |
| $k_{40}$<br>(i23 → i24)   | $1.26 \times 10^{-1}$ | 1.22                  | $2.51 \times 10^1$    |
| $k_{-40}$<br>(i24 → i23)  | $3.27 \times 10^{-5}$ | $4.98 \times 10^{-4}$ | $2.04 \times 10^{-2}$ |
| $k_{41}$<br>(i24 → p11+H) | $3.75 \times 10^4$    | $1.13 \times 10^5$    | $5.78 \times 10^5$    |
| $k_{15}$<br>(i9 → i11)    | $7.29 \times 10^4$    | $1.83 \times 10^5$    | $6.56 \times 10^5$    |
| $k_{-15}$<br>(i11 → i9)   | $3.13 \times 10^6$    | $9.75 \times 10^6$    | $4.82 \times 10^7$    |
| $k_{16}$<br>(i9 → i10)    | $6.07 \times 10^{-3}$ | $1.35 \times 10^{-1}$ | 6.54                  |
| $k_{-16}$<br>(i10 → i9)   | 1.12                  | $2.06 \times 10^1$    | $7.55 \times 10^2$    |
| $k_{17}$<br>(i9 → p6+H)   | 3.00                  | $3.61 \times 10^1$    | $9.14 \times 10^2$    |
| $k_{18}$<br>(i10 → p6+H)  | $1.30 \times 10^2$    | $1.62 \times 10^3$    | $3.97 \times 10^4$    |
| $k_{19}$<br>(i10 → i12)   | $2.44 \times 10^{10}$ | $2.97 \times 10^{10}$ | $3.92 \times 10^{10}$ |
| $k_{-19}$<br>(i12 → i10)  | $9.13 \times 10^3$    | $2.86 \times 10^4$    | $1.54 \times 10^5$    |
| $k_{-20}$<br>(i11 → i12)  | $8.66 \times 10^3$    | $3.66 \times 10^4$    | $2.63 \times 10^5$    |
| $k_{-20}$<br>(i12 → i11)  | $2.86 \times 10^{-2}$ | $2.02 \times 10^{-1}$ | 3.25                  |
| $k_{21}$<br>(i12 → p5+H)  | $7.67 \times 10^8$    | $1.26 \times 10^9$    | $2.66 \times 10^9$    |

---

---

|                            |                       |                       |                       |
|----------------------------|-----------------------|-----------------------|-----------------------|
| $k_{42}$<br>(i9 → i23)     | $5.18 \times 10^6$    | $1.07 \times 10^7$    | $2.96 \times 10^7$    |
| $k_{-42}$<br>(i23 → i9)    | $6.94 \times 10^6$    | $1.82 \times 10^7$    | $7.20 \times 10^7$    |
| $k_{43}$<br>(i23 → i25)    | $4.14 \times 10^{-1}$ | 3.48                  | $6.13 \times 10^1$    |
| $k_{-43}$<br>(i25 → i23)   | $9.91 \times 10^{-5}$ | $1.32 \times 10^{-3}$ | $4.66 \times 10^{-2}$ |
| $k_{44}$<br>(i25 → p11'+H) | $5.90 \times 10^4$    | $1.75 \times 10^5$    | $8.74 \times 10^5$    |
| $k_{51}$<br>(i30 → i31)    | $6.25 \times 10^7$    | $1.31 \times 10^8$    | $3.55 \times 10^8$    |
| $k_{-51}$<br>(i31 → i30)   | $4.15 \times 10^{10}$ | $7.10 \times 10^{10}$ | $1.45 \times 10^{11}$ |
| $k_{52}$<br>(i31 → i5)     | $5.82 \times 10^{11}$ | $7.23 \times 10^{11}$ | $9.71 \times 10^{11}$ |
| $k_{-52}$<br>(i5 → i31)    | $1.02 \times 10^6$    | $2.36 \times 10^6$    | $7.60 \times 10^6$    |
| $k_{53}$<br>(i32 → i33)    | $1.29 \times 10^8$    | $2.55 \times 10^8$    | $6.35 \times 10^8$    |
| $k_{-53}$<br>(i33 → i32)   | $2.44 \times 10^{10}$ | $4.20 \times 10^{10}$ | $8.71 \times 10^{10}$ |
| $k_{54}$<br>(i33 → i9)     | $1.41 \times 10^{12}$ | $1.71 \times 10^{12}$ | $2.23 \times 10^{12}$ |
| $k_{-54}$<br>(i9 → i33)    | $6.94 \times 10^5$    | $1.64 \times 10^6$    | $5.43 \times 10^6$    |

---



**Table S4** RRKM rate constants ( $s^{-1}$ ) for the reaction of phenylethynyl radicals with 1,3-pentadiene computed with wB97XD/cc-pVTZ zero-point energy corrected CCSD(T)/cc-pVTZ energies, and wB97X-D/cc-pVTZ harmonic frequencies at collision energies of 0.0, 26.7 and 74.5  $\text{kJ mol}^{-1}$  relative to the entrance channel.

|                                      | <b>0.0</b>            | <b>26.7</b>           | <b>74.5</b>           |
|--------------------------------------|-----------------------|-----------------------|-----------------------|
| $k_{22}$<br>(i13 $\rightarrow$ i15)  | $2.06 \times 10^5$    | $4.95 \times 10^5$    | $1.77 \times 10^6$    |
| $k_{-22}$<br>(i15 $\rightarrow$ i13) | $1.90 \times 10^7$    | $5.41 \times 10^7$    | $2.51 \times 10^8$    |
| $k_{23}$<br>(i13 $\rightarrow$ i14)  | $1.13 \times 10^{-2}$ | $2.67 \times 10^{-1}$ | $1.59 \times 10^1$    |
| $k_{-23}$<br>(i14 $\rightarrow$ i13) | $2.63 \times 10^{-1}$ | 5.22                  | $2.39 \times 10^2$    |
| $k_{24}$<br>(i13 $\rightarrow$ p8+H) | 7.43                  | $9.43 \times 10^1$    | $2.87 \times 10^3$    |
| $k_{25}$<br>(i14 $\rightarrow$ p8+H) | $6.52 \times 10^1$    | $8.21 \times 10^2$    | $2.32 \times 10^4$    |
| $k_{26}$<br>(i14 $\rightarrow$ i16)  | $8.50 \times 10^9$    | $1.01 \times 10^{10}$ | $1.30 \times 10^{10}$ |
| $k_{-26}$<br>(i16 $\rightarrow$ i14) | $3.56 \times 10^4$    | $1.05 \times 10^5$    | $5.49 \times 10^5$    |
| $k_{27}$<br>(i15 $\rightarrow$ i16)  | $2.25 \times 10^4$    | $9.39 \times 10^4$    | $7.34 \times 10^5$    |
| $k_{-27}$<br>(i16 $\rightarrow$ i15) | $4.76 \times 10^{-2}$ | $3.49 \times 10^{-1}$ | 6.58                  |
| $k_{28}$<br>(i16 $\rightarrow$ p7+H) | $6.84 \times 10^8$    | $1.10 \times 10^9$    | $2.33 \times 10^9$    |

---

|               |                       |                       |                       |
|---------------|-----------------------|-----------------------|-----------------------|
| $k_{45}$      |                       |                       |                       |
| (i13 → i26)   | $2.18 \times 10^7$    | $4.36 \times 10^7$    | $1.21 \times 10^8$    |
| $k_{-45}$     |                       |                       |                       |
| (i26 → i13)   | $3.16 \times 10^7$    | $7.84 \times 10^7$    | $3.00 \times 10^8$    |
| $k_{46}$      |                       |                       |                       |
| (i26 → i27)   | $1.20 \times 10^{-1}$ | 1.22                  | $3.00 \times 10^1$    |
| $k_{-46}$     |                       |                       |                       |
| (i27 → i26)   | $9.32 \times 10^{-5}$ | $1.48 \times 10^{-3}$ | $7.36 \times 10^{-2}$ |
| $k_{47}$      |                       |                       |                       |
| (i27 → p12+H) | $2.39 \times 10^4$    | $7.66 \times 10^4$    | $4.52 \times 10^5$    |
| $k_{29}$      |                       |                       |                       |
| (i17 → i19)   | $1.51 \times 10^5$    | $3.98 \times 10^5$    | $1.61 \times 10^6$    |
| $k_{-29}$     |                       |                       |                       |
| (i19 → i17)   | $2.10 \times 10^6$    | $6.85 \times 10^6$    | $3.82 \times 10^7$    |
| $k_{30}$      |                       |                       |                       |
| (i17 → i18)   | $2.72 \times 10^{-2}$ | $6.46 \times 10^{-1}$ | $3.82 \times 10^1$    |
| $k_{-30}$     |                       |                       |                       |
| (i18 → i17)   | $1.84 \times 10^{-1}$ | 3.83                  | $1.85 \times 10^2$    |
| $k_{31}$      |                       |                       |                       |
| (i17 → p9+H)  | $1.10 \times 10^1$    | $1.47 \times 10^2$    | $4.72 \times 10^3$    |
| $k_{32}$      |                       |                       |                       |
| (i18 → p9+H)  | $8.18 \times 10^1$    | $9.61 \times 10^2$    | $2.52 \times 10^4$    |
| $k_{33}$      |                       |                       |                       |
| (i18 → i20)   | $9.93 \times 10^9$    | $1.23 \times 10^{10}$ | $1.69 \times 10^{10}$ |
| $k_{-33}$     |                       |                       |                       |
| (i20 → i18)   | $5.80 \times 10^3$    | $1.81 \times 10^4$    | $1.04 \times 10^5$    |

---

---

|                          |                       |                       |                       |
|--------------------------|-----------------------|-----------------------|-----------------------|
| $k_{34}$<br>(i19 → i20)  | $3.32 \times 10^4$    | $1.27 \times 10^5$    | $8.81 \times 10^5$    |
| $k_{-34}$<br>(i20 → i19) | $1.89 \times 10^{-2}$ | $1.29 \times 10^{-1}$ | 2.21                  |
| $k_{35}$<br>(i20 → p3+H) | $3.98 \times 10^8$    | $6.48 \times 10^8$    | $1.40 \times 10^9$    |
| $k_{48}$<br>(i17 → i26)  | $1.18 \times 10^7$    | $2.56 \times 10^7$    | $7.91 \times 10^7$    |
| $k_{-48}$<br>(i26 → i17) | $4.25 \times 10^6$    | $1.18 \times 10^7$    | $5.34 \times 10^7$    |
| $k_{55}$<br>(i34 → i35)  | $5.13 \times 10^7$    | $1.08 \times 10^8$    | $3.02 \times 10^8$    |
| $k_{-55}$<br>(i35 → i34) | $2.98 \times 10^{10}$ | $5.17 \times 10^{10}$ | $1.11 \times 10^{11}$ |
| $k_{56}$<br>(i35 → i13)  | $7.61 \times 10^{11}$ | $9.45 \times 10^{11}$ | $1.28 \times 10^{12}$ |
| $k_{-56}$<br>(i13 → i35) | $1.49 \times 10^6$    | $3.68 \times 10^6$    | $1.36 \times 10^7$    |
| $k_{57}$<br>(i36 → i37)  | $1.65 \times 10^7$    | $3.55 \times 10^7$    | $1.03 \times 10^8$    |
| $k_{-57}$<br>(i37 → i36) | $4.22 \times 10^{10}$ | $7.32 \times 10^{10}$ | $1.57 \times 10^{11}$ |
| $k_{58}$<br>(i37 → i17)  | $9.67 \times 10^{11}$ | $1.17 \times 10^{12}$ | $1.54 \times 10^{12}$ |
| $k_{-58}$<br>(i17 → i37) | $8.03 \times 10^6$    | $1.78 \times 10^7$    | $5.99 \times 10^7$    |

---

**Table S5** Predicted energies of species participating on the adiabatic doublet ground state potential energy surfaces for reactions of **(a)** phenylethynyl + 1,3-butadiene-*d*<sub>6</sub>, **(b)** phenylethynyl + isoprene, and **(c)** phenylethynyl + 1,3-pentadiene. The energies are computed at the CCSD(T)/cc-pVTZ//wB97X-D/cc-pVTZ level of theory with wB97X-D/cc-pVTZ zero-point energy corrections.

**(a)**

|                                                                                       | wB97X-D/<br>cc-pVTZ + E <sub>zpc</sub> <sup>a</sup> | E <sub>zpc</sub> <sup>b</sup> | CCSD(T)/<br>cc-pVTZ | E <sup>c</sup><br>(kJ/mol) |
|---------------------------------------------------------------------------------------|-----------------------------------------------------|-------------------------------|---------------------|----------------------------|
| <b>Phenylethynyl (C<sub>2v</sub>, <sup>2</sup>B<sub>1</sub>)</b>                      | -307.568246                                         | 0.098128                      | -307.091736         |                            |
| <b>1,3-Butadiene-<i>d</i><sub>6</sub> (C<sub>2h</sub>, <sup>1</sup>A<sub>g</sub>)</b> | -155.923156                                         | 0.066690                      | -155.695410         |                            |
| <b>Phenylethynyl + 1,3-Butadiene-<i>d</i><sub>6</sub></b>                             | -463.491402                                         | 0.164818                      | -462.787146         | 0.0                        |
| <b>i1 (C<sub>1</sub>, <sup>2</sup>A)</b>                                              | -463.598479                                         | 0.168608                      | -462.898159         | -282                       |
| <b>vdW(i1) (C<sub>1</sub>, <sup>2</sup>A)</b>                                         | -463.498285                                         | 0.165573                      | -462.793821         | -16                        |
| <b>i2 (C<sub>s</sub>, <sup>2</sup>A')</b>                                             | -463.595274                                         | 0.168587                      | -462.887969         | -255                       |
| <b>i3 (C<sub>s</sub>, <sup>2</sup>A')</b>                                             | -463.611518                                         | 0.172618                      | -462.912385         | -308                       |
| <b>i4 (C<sub>1</sub>, <sup>2</sup>A)</b>                                              | -463.670160                                         | 0.172375                      | -462.966964         | -452                       |
| <b>i21 (C<sub>1</sub>, <sup>2</sup>A)</b>                                             | -463.616542                                         | 0.170556                      | -462.913413         | -316                       |
| <b>i22 (C<sub>1</sub>, <sup>2</sup>A)</b>                                             | -463.661655                                         | 0.171404                      | -462.957306         | -430                       |
| <b>i28 (C<sub>1</sub>, <sup>2</sup>A)</b>                                             | -463.568238                                         | 0.167908                      | -462.871539         | -213                       |
| <b>i29 (C<sub>1</sub>, <sup>2</sup>A)</b>                                             | -463.569512                                         | 0.168294                      | -462.862622         | -189                       |
| <b>tsi1vdW (C<sub>1</sub>, <sup>2</sup>A)</b>                                         | -463.498232                                         | 0.165422                      | -462.793505         | -15                        |
| <b>tsi1i3 (C<sub>1</sub>, <sup>2</sup>A)</b>                                          | -463.556519                                         | 0.168366                      | -462.854733         | -168                       |
| <b>tsi1i2 (C<sub>1</sub>, <sup>2</sup>A)</b>                                          | -463.522238                                         | 0.164108                      | -462.809702         | -61                        |
| <b>tsi1p2 (C<sub>1</sub>, <sup>2</sup>A)</b>                                          | -463.521780                                         | 0.163138                      | -462.815650         | -79                        |
| <b>tsi3i4 (C<sub>1</sub>, <sup>2</sup>A)</b>                                          | -463.550953                                         | 0.168180                      | -462.844216         | -141                       |
| <b>tsi2i4 (C<sub>1</sub>, <sup>2</sup>A)</b>                                          | -463.582154                                         | 0.168627                      | -462.875743         | -223                       |
| <b>tsi2p2 (C<sub>1</sub>, <sup>2</sup>A)</b>                                          | -463.519938                                         | 0.163247                      | -462.820733         | -92                        |
| <b>tsi4p1 (C<sub>1</sub>, <sup>2</sup>A)</b>                                          | -463.618329                                         | 0.167597                      | -462.913531         | -325                       |
| <b>tsi1i21 (C<sub>1</sub>, <sup>2</sup>A)</b>                                         | -463.564091                                         | 0.167485                      | -462.860298         | -185                       |
| <b>tsi21i22 (C<sub>1</sub>, <sup>2</sup>A)</b>                                        | -463.531495                                         | 0.167466                      | -462.824424         | -91                        |
| <b>tsi22p10 (C<sub>1</sub>, <sup>2</sup>A)</b>                                        | -463.570035                                         | 0.165855                      | -462.870741         | -217                       |
| <b>tsi1i29 (C<sub>1</sub>, <sup>2</sup>A)</b>                                         | -463.563395                                         | 0.167218                      | -462.854922         | -172                       |
| <b>tsi2p12 (C<sub>1</sub>, <sup>2</sup>A)</b>                                         | -463.515799                                         | 0.164623                      | -462.8092631        | -59                        |

---

|                                                                    |             |          |              |      |
|--------------------------------------------------------------------|-------------|----------|--------------|------|
| <b>D</b>                                                           | -0.502669   | 0.000000 | -0.499810    |      |
| <b>p1 (D<sub>2</sub>, <sup>1</sup>A)</b>                           | -463.125188 | 0.166695 | -462.426635  |      |
| <b>p2 (C<sub>s</sub>, <sup>1</sup>A')</b>                          | -463.026086 | 0.162543 | -462.327788  |      |
| <b>phenylacetylene (C<sub>2v</sub>, <sup>1</sup>A<sub>1</sub>)</b> | -308.274325 | 0.107761 | -307.8108257 |      |
| <b>p13 (C<sub>1</sub>, <sup>2</sup>A)</b>                          | -155.243032 | 0.056343 | -155.0059924 |      |
| <b>p10 (C<sub>1</sub>, <sup>1</sup>A)</b>                          | -463.071536 | 0.165255 | -462.374622  |      |
| <b>p1 + D</b>                                                      | -463.627857 | 0.166695 | -462.926445  | -361 |
| <b>p2 + D</b>                                                      | -463.528755 | 0.162543 | -462.827598  | -112 |
| <b>p10 + D</b>                                                     | -463.574205 | 0.165255 | -462.874432  | -228 |
| <b>p13 + phenylacetylene</b>                                       | -463.517357 | 0.164104 | -462.8168181 | -80  |

---

**(b)**

|                                                                 | wB97X-D/<br>cc-pVTZ + E <sub>zpc</sub> <sup>a</sup> | E <sub>zpc</sub> <sup>b</sup> | CCSD(T)/<br>cc-pVTZ | E <sup>c</sup><br>(kJ/mol) |
|-----------------------------------------------------------------|-----------------------------------------------------|-------------------------------|---------------------|----------------------------|
| <b>phenylethynyl(C<sub>2v</sub>, <sup>2</sup>B<sub>1</sub>)</b> | -307.568246                                         | 0.098128                      | -307.091736         |                            |
| <b>Isoprene (C<sub>s</sub>, <sup>1</sup>A')</b>                 | -195.195944                                         | 0.114251                      | -194.939888         |                            |
| <b>Phenylacetylenyl + Isoprene</b>                              | -502.764190                                         | 0.212379                      | -502.031624         | 0.0                        |
| <b>i5 (C<sub>1</sub>, <sup>2</sup>A)</b>                        | -502.868400                                         | 0.215639                      | -502.139237         | -274                       |
| <b>vdW(i5) (C<sub>1</sub>, <sup>2</sup>A)</b>                   | -502.771936                                         | 0.213210                      | -502.039091         | -17                        |
| <b>i7 (C<sub>1</sub>, <sup>2</sup>A)</b>                        | -502.885113                                         | 0.220221                      | -502.157577         | -310                       |
| <b>i6 (C<sub>1</sub>, <sup>2</sup>A)</b>                        | -502.859919                                         | 0.216318                      | -502.125427         | -236                       |
| <b>i8 (C<sub>1</sub>, <sup>2</sup>A)</b>                        | -502.945260                                         | 0.219636                      | -502.213137         | -458                       |
| <b>i23(C<sub>1</sub>, <sup>2</sup>A)</b>                        | -502.891376                                         | 0.218054                      | -502.159314         | -320                       |
| <b>i24(C<sub>1</sub>, <sup>2</sup>A)</b>                        | -502.937699                                         | 0.218689                      | -502.204290         | -437                       |
| <b>i9 (C<sub>1</sub>, <sup>2</sup>A)</b>                        | -502.871802                                         | 0.215800                      | -502.142372         | -282                       |
| <b>vdW(i9) (C<sub>1</sub>, <sup>2</sup>A)</b>                   | -502.772305                                         | 0.213142                      | -502.039425         | -18                        |
| <b>i11(C<sub>1</sub>, <sup>2</sup>A)</b>                        | -502.885531                                         | 0.220066                      | -502.157776         | -311                       |
| <b>i10 (C<sub>1</sub>, <sup>2</sup>A)</b>                       | -502.865429                                         | 0.216084                      | -502.130773         | -251                       |
| <b>i12 (C<sub>1</sub>, <sup>2</sup>A)</b>                       | -502.942922                                         | 0.219579                      | -502.211193         | -453                       |
| <b>i25(C<sub>1</sub>, <sup>2</sup>A)</b>                        | -502.938731                                         | 0.218730                      | -502.204787         | -438                       |
| <b>i30 (C<sub>1</sub>, <sup>2</sup>A)</b>                       | -502.843257                                         | 0.214450                      | -502.117145         | -219                       |
| <b>i31 (C<sub>1</sub>, <sup>2</sup>A)</b>                       | -502.843890                                         | 0.215945                      | -502.108464         | -192                       |
| <b>i32 (C<sub>1</sub>, <sup>2</sup>A)</b>                       | -502.839000                                         | 0.214445                      | -502.114729         | -213                       |
| <b>i33 (C<sub>1</sub>, <sup>2</sup>A)</b>                       | -502.843325                                         | 0.215831                      | -502.108869         | -194                       |
| <b>tsi5vdW (C<sub>1</sub>, <sup>2</sup>A)</b>                   | -502.771920                                         | 0.213101                      | -502.038874         | -17                        |
| <b>tsi5i7 (C<sub>1</sub>, <sup>2</sup>A)</b>                    | -502.828539                                         | 0.215561                      | -502.098306         | -167                       |
| <b>tsi5i6 (C<sub>1</sub>, <sup>2</sup>A)</b>                    | -502.795293                                         | 0.210260                      | -502.053581         | -63                        |
| <b>tsi5i23 (C<sub>1</sub>, <sup>2</sup>A)</b>                   | -502.837622                                         | 0.214667                      | -502.105168         | -187                       |
| <b>tsi5p4 (C<sub>1</sub>, <sup>2</sup>A)</b>                    | -502.794082                                         | 0.208473                      | -502.057487         | -78                        |
| <b>tsi7i8 (C<sub>1</sub>, <sup>2</sup>A)</b>                    | -502.827265                                         | 0.214614                      | -502.090733         | -149                       |

|                                                 |             |          |             |      |
|-------------------------------------------------|-------------|----------|-------------|------|
| <b>tsi6i8 (C<sub>1</sub>, <sup>2</sup>A)</b>    | -502.855408 | 0.215857 | -502.120866 | -225 |
| <b>tsi6p4 (C<sub>1</sub>, <sup>2</sup>A)</b>    | -502.792127 | 0.208415 | -502.055250 | -72  |
| <b>tsi8p3 (C<sub>1</sub>, <sup>2</sup>A)</b>    | -502.895350 | 0.212445 | -502.159413 | -335 |
| <b>tsi23i24 (C<sub>1</sub>, <sup>2</sup>A)</b>  | -502.807506 | 0.213346 | -502.070045 | -98  |
| <b>tsi24p11 (C<sub>1</sub>, <sup>2</sup>A)</b>  | -502.846966 | 0.210146 | -502.115885 | -227 |
| <b>tsi9vdW (C<sub>1</sub>, <sup>2</sup>A)</b>   | -502.772097 | 0.213154 | -502.039118 | -18  |
| <b>tsi9i11 (C<sub>1</sub>, <sup>2</sup>A)</b>   | -502.830204 | 0.215523 | -502.099468 | -170 |
| <b>tsi9i10 (C<sub>1</sub>, <sup>2</sup>A)</b>   | -502.797412 | 0.210056 | -502.055378 | -68  |
| <b>tsi9i23 (C<sub>1</sub>, <sup>2</sup>A)</b>   | -502.839061 | 0.214471 | -502.106099 | -190 |
| <b>tsi9p6 (C<sub>1</sub>, <sup>2</sup>A)</b>    | -502.798333 | 0.207938 | -502.061581 | -90  |
| <b>tsi11i12 (C<sub>1</sub>, <sup>2</sup>A)</b>  | -502.825337 | 0.214321 | -502.088646 | -145 |
| <b>tsi10i12 (C<sub>1</sub>, <sup>2</sup>A)</b>  | -502.854925 | 0.215721 | -502.120385 | -224 |
| <b>tsi10p6 (C<sub>1</sub>, <sup>2</sup>A)</b>   | -502.795546 | 0.208035 | -502.058768 | -83  |
| <b>tsi12p5 (C<sub>1</sub>, <sup>2</sup>A)</b>   | -502.893911 | 0.212317 | -502.157697 | -331 |
| <b>tsi23i25 (C<sub>1</sub>, <sup>2</sup>A)</b>  | -502.808791 | 0.213275 | -502.072369 | -105 |
| <b>tsi25p11' (C<sub>1</sub>, <sup>2</sup>A)</b> | -502.847955 | 0.210174 | -502.116939 | -230 |
| <b>tsi30i31 (C<sub>1</sub>, <sup>2</sup>A)</b>  | -502.824927 | 0.214028 | -502.090902 | -151 |
| <b>tsi32i33 (C<sub>1</sub>, <sup>2</sup>A)</b>  | -502.823275 | 0.213992 | -502.090983 | -152 |
| <b>tsi31i5 (C<sub>1</sub>, <sup>2</sup>A)</b>   | -502.837087 | 0.214801 | -502.100599 | -175 |
| <b>tsi33i9 (C<sub>1</sub>, <sup>2</sup>A)</b>   | -502.837807 | 0.214661 | -502.101651 | -178 |
| <b>H</b>                                        | -0.502156   | 0.000000 | -0.499810   |      |
| <b>p3 (C<sub>1</sub>, <sup>1</sup>A)</b>        | -502.400500 | 0.210639 | -501.670030 |      |
| <b>p4 (C<sub>s</sub>, <sup>1</sup>A')</b>       | -502.299779 | 0.206644 | -501.569713 |      |
| <b>p5 (C<sub>1</sub>, <sup>1</sup>A)</b>        | -502.400447 | 0.210632 | -501.669942 |      |
| <b>p6 (C<sub>s</sub>, <sup>1</sup>A')</b>       | -502.302220 | 0.206888 | -501.572642 |      |
| <b>p11(C<sub>1</sub>, <sup>1</sup>A)</b>        | -502.349213 | 0.209151 | -501.620255 |      |
| <b>p11'(C<sub>1</sub>, <sup>1</sup>A)</b>       | -502.349690 | 0.209009 | -501.619947 |      |
| <b>p3 + H</b>                                   | -502.902656 | 0.210639 | -502.169840 | -367 |

|               |             |          |             |      |
|---------------|-------------|----------|-------------|------|
| <b>p4 + H</b> | -502.801935 | 0.206644 | -502.069523 | -115 |
| <b>p5 + H</b> | -502.902603 | 0.210632 | -502.169752 | -367 |
| <b>p6 + H</b> | -502.804376 | 0.206888 | -502.072452 | -122 |
| <b>p11+H</b>  | -502.851369 | 0.209151 | -502.120065 | -241 |
| <b>p11'+H</b> | -502.851846 | 0.209009 | -502.119757 | -240 |

---



(c)

|                                                                  | wB97X-D/<br>cc-pVTZ + E <sub>zpc</sub> <sup>a</sup> | E <sub>zpc</sub> <sup>b</sup> | CCSD(T)/<br>cc-pVTZ | E <sup>c</sup><br>(kJ/mol) |
|------------------------------------------------------------------|-----------------------------------------------------|-------------------------------|---------------------|----------------------------|
| <b>Phenylethynyl (C<sub>2v</sub>, <sup>2</sup>B<sub>1</sub>)</b> | -307.568246                                         | 0.098128                      | -307.091736         |                            |
| <b>1,3-pentadiene (C<sub>s</sub>, <sup>1</sup>A')</b>            | -195.196422                                         | 0.114016                      | -194.939183         |                            |
| <b>Phenylethynyl + 1,3-pentadiene</b>                            | -502.764668                                         | 0.212144                      | -502.030919         | 0.0                        |
| <b>i13 (C<sub>1</sub>, <sup>2</sup>A)</b>                        | -502.871723                                         | 0.216014                      | -502.141710         | -281                       |
| <b>vdW(i13) (C<sub>1</sub>, <sup>2</sup>A)</b>                   | -502.772608                                         | 0.213044                      | -502.038693         | -18                        |
| <b>i14 (C<sub>1</sub>, <sup>2</sup>A)</b>                        | -502.867396                                         | 0.216122                      | -502.131100         | -253                       |
| <b>i15 (C<sub>1</sub>, <sup>2</sup>A)</b>                        | -502.879890                                         | 0.220571                      | -502.153977         | -301                       |
| <b>i16 (C<sub>1</sub>, <sup>2</sup>A)</b>                        | -502.938571                                         | 0.220126                      | -502.208502         | -445                       |
| <b>i17 (C<sub>1</sub>, <sup>2</sup>A)</b>                        | -502.867249                                         | 0.216159                      | -502.139817         | -275                       |
| <b>vdW(i17) (C<sub>1</sub>, <sup>2</sup>A)</b>                   | -502.773504                                         | 0.213311                      | -502.039458         | -19                        |
| <b>i18 (C<sub>1</sub>, <sup>2</sup>A)</b>                        | -502.866526                                         | 0.215470                      | -502.131357         | -255                       |
| <b>i19 (C<sub>1</sub>, <sup>2</sup>A)</b>                        | -502.880644                                         | 0.220537                      | -502.154487         | -302                       |
| <b>i20 (C<sub>1</sub>, <sup>2</sup>A)</b>                        | -502.943152                                         | 0.219536                      | -502.211146         | -454                       |
| <b>i26 (C<sub>1</sub>, <sup>2</sup>A)</b>                        | -502.887110                                         | 0.218459                      | -502.156757         | -314                       |
| <b>i27 (C<sub>1</sub>, <sup>2</sup>A)</b>                        | -502.931230                                         | 0.219410                      | -502.199621         | -424                       |
| <b>i34 (C<sub>1</sub>, <sup>2</sup>A)</b>                        | -502.841898                                         | 0.214535                      | -502.115268         | -215                       |
| <b>i35 (C<sub>1</sub>, <sup>2</sup>A)</b>                        | -502.843291                                         | 0.215830                      | -502.107118         | -190                       |
| <b>i36 (C<sub>1</sub>, <sup>2</sup>A)</b>                        | -502.844046                                         | 0.214831                      | -502.116645         | -218                       |
| <b>i37 (C<sub>1</sub>, <sup>2</sup>A)</b>                        | -502.842699                                         | 0.215833                      | -502.107565         | -192                       |
| <b>tsi13vdW (C<sub>1</sub>, <sup>2</sup>A)</b>                   | -502.772461                                         | 0.213083                      | -502.038454         | -17                        |
| <b>tsi13i14 (C<sub>1</sub>, <sup>2</sup>A)</b>                   | -502.797192                                         | 0.210277                      | -502.054226         | -66                        |
| <b>tsi13i15 (C<sub>1</sub>, <sup>2</sup>A)</b>                   | -502.831062                                         | 0.215982                      | -502.100354         | -172                       |
| <b>tsi13i26 (C<sub>1</sub>, <sup>2</sup>A)</b>                   | -502.839580                                         | 0.215048                      | -502.106795         | -192                       |
| <b>tsi13p8 (C<sub>1</sub>, <sup>2</sup>A)</b>                    | -502.798354                                         | 0.207967                      | -502.060223         | -88                        |
| <b>tsi14i16 (C<sub>1</sub>, <sup>2</sup>A)</b>                   | -502.857046                                         | 0.216085                      | -502.121864         | -228                       |

|                                                |             |          |             |      |
|------------------------------------------------|-------------|----------|-------------|------|
| <b>tsi14p8 (C<sub>1</sub>, <sup>2</sup>A)</b>  | -502.796332 | 0.208071 | -502.058212 | -82  |
| <b>tsi15i16 (C<sub>1</sub>, <sup>2</sup>A)</b> | -502.821969 | 0.214961 | -502.086831 | -139 |
| <b>tsi16p7 (C<sub>1</sub>, <sup>2</sup>A)</b>  | -502.889072 | 0.212828 | -502.157211 | -330 |
| <b>tsi17vdW (C<sub>1</sub>, <sup>2</sup>A)</b> | -502.773187 | 0.213038 | -502.038972 | -19  |
| <b>tsi17i26 (C<sub>1</sub>, <sup>2</sup>A)</b> | -502.833887 | 0.214860 | -502.102559 | -181 |
| <b>tsi1718 (C<sub>1</sub>, <sup>2</sup>A)</b>  | -502.795457 | 0.210186 | -502.053901 | -65  |
| <b>tsi17i19 (C<sub>1</sub>, <sup>2</sup>A)</b> | -502.825463 | 0.216078 | -502.096528 | -162 |
| <b>tsi17p9 (C<sub>1</sub>, <sup>2</sup>A)</b>  | -502.795072 | 0.208052 | -502.059087 | -85  |
| <b>tsi18i20 (C<sub>1</sub>, <sup>2</sup>A)</b> | -502.854724 | 0.215598 | -502.120010 | -225 |
| <b>tsi18p9 (C<sub>1</sub>, <sup>2</sup>A)</b>  | -502.796214 | 0.207755 | -502.059037 | -85  |
| <b>tsi19i20 (C<sub>1</sub>, <sup>2</sup>A)</b> | -502.825114 | 0.214623 | -502.089243 | -147 |
| <b>tsi20p3 (C<sub>1</sub>, <sup>2</sup>A)</b>  | -502.894099 | 0.212392 | -502.157953 | -333 |
| <b>tsi25i27 (C<sub>1</sub>, <sup>2</sup>A)</b> | -502.803118 | 0.213563 | -502.068118 | -94  |
| <b>tsi27p12 (C<sub>1</sub>, <sup>2</sup>A)</b> | -502.841697 | 0.210835 | -502.111031 | -214 |
| <b>tsi13i35 (C<sub>1</sub>, <sup>2</sup>A)</b> | -502.836881 | 0.214697 | -502.099392 | -173 |
| <b>tsi34i35 (C<sub>1</sub>, <sup>2</sup>A)</b> | -502.824142 | 0.213967 | -502.089408 | -149 |
| <b>tsi17i37 (C<sub>1</sub>, <sup>2</sup>A)</b> | -502.836739 | 0.214640 | -502.100608 | -176 |
| <b>tsi36i37 (C<sub>1</sub>, <sup>2</sup>A)</b> | -502.824349 | 0.214108 | -502.089664 | -149 |
| <b>H</b>                                       | -0.502669   | 0.000000 | -0.499810   |      |
| <b>p3 (C<sub>1</sub>, <sup>1</sup>A)</b>       | -502.400475 | 0.210664 | -501.670027 |      |
| <b>p7 (C<sub>1</sub>, <sup>1</sup>A)</b>       | -502.398180 | 0.210952 | -501.667936 |      |
| <b>p8 (C<sub>s</sub>, <sup>1</sup>A')</b>      | -502.302864 | 0.206900 | -501.572104 |      |
| <b>p9 (C<sub>s</sub>, <sup>1</sup>A')</b>      | -502.302255 | 0.206558 | -501.572483 |      |
| <b>p12 (C<sub>1</sub>, <sup>1</sup>A)</b>      | -502.34429  | 0.209234 | -501.614879 |      |
| <b>p3 + H</b>                                  | -502.903144 | 0.210664 | -502.169837 | -369 |
| <b>p7 + H</b>                                  | -502.900849 | 0.210952 | -502.167746 | -362 |
| <b>p8 + H</b>                                  | -502.805533 | 0.206900 | -502.071914 | -121 |
| <b>p9 + H</b>                                  | -502.804924 | 0.206558 | -502.072293 | -123 |

|                |             |          |             |      |
|----------------|-------------|----------|-------------|------|
| <b>p12 + H</b> | -502.846959 | 0.209234 | -502.114689 | -228 |
|----------------|-------------|----------|-------------|------|

---

<sup>a</sup> wB97XD/cc-pVTZ energy with zero-point energy correction in hartree.

<sup>b</sup> zero-point energy by wB97XD/cc-pVTZ in hartree.

<sup>c</sup> relative energy by CCSD(T)/cc-pVTZ with wB97XD/cc-pVTZ zero-point energy correction.

**Table S6** *w*B97X-D/cc-pVTZ optimized cartesian coordinates on the (a) phenylethynyl + 1,3-butadiene-*d*<sub>6</sub>, (b) phenylethynyl + isoprene, and (c) phenylethynyl + 1,3-pentadiene adiabatic doublet ground state potential energy surfaces.

(a)

| Atom                 | X         | Y         | Z         | Atom                                      | X         | Y         | Z         |
|----------------------|-----------|-----------|-----------|-------------------------------------------|-----------|-----------|-----------|
| <b>Phenylethynyl</b> |           |           |           | <b>1,3-Butadiene-<i>d</i><sub>6</sub></b> |           |           |           |
| C                    | 0.000000  | 0.000000  | 2.063239  | C                                         | 0.603602  | 1.736137  | 0.000000  |
| C                    | 0.000000  | 0.000000  | 3.335500  | C                                         | 0.603602  | 0.407600  | 0.000000  |
| C                    | 0.000000  | 0.000000  | 0.669896  | D                                         | 1.524507  | 2.302178  | 0.000000  |
| C                    | 0.000000  | 1.216831  | -0.046161 | D                                         | -0.322962 | 2.297576  | 0.000000  |
| C                    | 0.000000  | -1.216831 | -0.046161 | D                                         | 1.547781  | -0.128064 | 0.000000  |
| C                    | 0.000000  | 1.210125  | -1.423103 | C                                         | -0.603602 | -0.407600 | 0.000000  |
| H                    | 0.000000  | 2.143623  | 0.509225  | C                                         | -0.603602 | -1.736137 | 0.000000  |
| C                    | 0.000000  | -1.210125 | -1.423103 | D                                         | -1.547781 | 0.128064  | 0.000000  |
| H                    | 0.000000  | -2.143623 | 0.509225  | D                                         | -1.524507 | -2.302178 | 0.000000  |
| C                    | 0.000000  | 0.000000  | -2.111120 | D                                         | 0.322962  | -2.297576 | 0.000000  |
| H                    | 0.000000  | 2.142392  | -1.969839 |                                           |           |           |           |
| H                    | 0.000000  | -2.142392 | -1.969839 |                                           |           |           |           |
| H                    | 0.000000  | 0.000000  | -3.192694 |                                           |           |           |           |
| <b>i1</b>            |           |           |           | <b>i3</b>                                 |           |           |           |
| C                    | 3.581539  | -0.452531 | -0.140154 | C                                         | 0.000000  | 0.671262  | 0.000000  |
| C                    | 3.315342  | 0.816849  | 0.322194  | C                                         | 1.064176  | 1.442133  | 0.000000  |
| C                    | 4.280286  | 1.742021  | 0.653769  | C                                         | -1.356631 | 1.358019  | 0.000000  |
| D                    | 2.716013  | -2.383256 | 0.095857  | C                                         | -1.269922 | 2.854665  | 0.000000  |
| D                    | 4.61364   | -0.763892 | -0.257136 | C                                         | -0.143316 | 3.549760  | 0.000000  |
| D                    | 2.273525  | 1.100696  | 0.430608  | C                                         | 1.221643  | 2.903237  | 0.000000  |
| C                    | 0.027802  | -0.705735 | -0.247471 | D                                         | -1.932668 | 1.028945  | 0.871702  |
| D                    | 4.01341   | 2.724873  | 1.012775  | D                                         | -1.932668 | 1.028945  | -0.871702 |
| D                    | 5.333589  | 1.509434  | 0.56414   | D                                         | -2.215127 | 3.384947  | 0.000000  |
| D                    | 2.723449  | -1.802911 | -1.543768 | D                                         | -0.171171 | 4.632932  | 0.000000  |
| C                    | 2.55564   | -1.483848 | -0.508969 | D                                         | 1.793219  | 3.233281  | -0.873181 |
| C                    | -1.330254 | -0.27912  | -0.107942 | D                                         | 1.793219  | 3.233281  | 0.873181  |
| C                    | -2.130488 | -0.786425 | 0.916898  | C                                         | 0.059343  | -0.807100 | 0.000000  |
| C                    | -1.872418 | 0.652909  | -0.994259 | C                                         | 1.292349  | -1.465116 | 0.000000  |
| C                    | -3.443425 | -0.369561 | 1.049242  | C                                         | -1.096679 | -1.584000 | 0.000000  |
| H                    | -1.712381 | -1.507533 | 1.605194  | C                                         | 1.364670  | -2.843826 | 0.000000  |
| C                    | 1.167436  | -1.061933 | -0.366135 | H                                         | 2.199699  | -0.874688 | 0.000000  |
| C                    | -3.185920 | 1.066217  | -0.856215 | C                                         | -1.025047 | -2.970258 | 0.000000  |

|            |           |           |           |            |           |           |           |
|------------|-----------|-----------|-----------|------------|-----------|-----------|-----------|
| H          | -1.254206 | 1.047048  | -1.788683 | H          | -2.069789 | -1.113389 | 0.000000  |
| C          | -3.974916 | 0.556957  | 0.164468  | C          | 0.203093  | -3.606521 | 0.000000  |
| H          | -4.054303 | -0.769468 | 1.847042  | H          | 2.331280  | -3.329674 | 0.000000  |
| H          | -3.595377 | 1.788914  | -1.548773 | H          | -1.937347 | -3.551616 | 0.000000  |
| H          | -5.001102 | 0.881283  | 0.270178  | H          | 0.259277  | -4.686499 | 0.000000  |
| <b>i2</b>  |           |           |           | <b>i4</b>  |           |           |           |
| C          | 1.303018  | -0.884851 | 0.000000  | C          | -2.923759 | -1.127837 | 0.202580  |
| C          | 0.916421  | -2.131254 | 0.000000  | C          | -3.557707 | 0.051425  | 0.045945  |
| C          | -0.479923 | -2.593687 | 0.000000  | C          | -1.437840 | -1.250716 | 0.125674  |
| C          | -1.559421 | -1.806595 | 0.000000  | C          | -0.704151 | 0.053578  | -0.033262 |
| C          | -2.920091 | -2.308624 | 0.000000  | C          | -1.426507 | 1.211630  | -0.207761 |
| C          | -4.000540 | -1.532379 | 0.000000  | C          | -2.820874 | 1.242339  | -0.183963 |
| D          | -0.617242 | -3.670008 | 0.000000  | D          | -3.487229 | -2.035970 | 0.372672  |
| D          | -1.434224 | -0.727594 | 0.000000  | D          | -4.637842 | 0.096198  | 0.093277  |
| D          | -3.039084 | -3.387808 | 0.000000  | D          | -1.187358 | -1.921862 | -0.710720 |
| D          | -3.916557 | -0.452410 | 0.000000  | D          | -1.061514 | -1.782876 | 1.009583  |
| D          | -4.997295 | -1.950430 | 0.000000  | D          | -0.903972 | 2.142554  | -0.381070 |
| D          | 1.673573  | -2.912437 | 0.000000  | D          | -3.339479 | 2.178441  | -0.332386 |
| C          | 1.282107  | 0.492255  | 0.000000  | C          | 0.761189  | 0.035714  | -0.014951 |
| C          | 1.287918  | 1.223161  | 1.216821  | C          | 1.513751  | 1.202628  | 0.181656  |
| C          | 1.287918  | 1.223161  | -1.216821 | C          | 1.469467  | -1.161226 | -0.177397 |
| C          | 1.287918  | 2.599650  | 1.204216  | C          | 2.894533  | 1.175234  | 0.191678  |
| H          | 1.287835  | 0.679867  | 2.151320  | H          | 1.012791  | 2.144344  | 0.354792  |
| C          | 1.287918  | 2.599650  | -1.204216 | C          | 2.854303  | -1.187803 | -0.168151 |
| H          | 1.287835  | 0.679867  | -2.151320 | H          | 0.936988  | -2.089447 | -0.326599 |
| C          | 1.288502  | 3.299419  | 0.000000  | C          | 3.576880  | -0.020709 | 0.013007  |
| H          | 1.287122  | 3.140591  | 2.140963  | H          | 3.444285  | 2.093246  | 0.350902  |
| H          | 1.287122  | 3.140591  | -2.140963 | H          | 3.369717  | -2.129148 | -0.304253 |
| H          | 1.290436  | 4.380338  | 0.000000  | H          | 4.657902  | -0.041018 | 0.023472  |
| <b>i21</b> |           |           |           | <b>i22</b> |           |           |           |
| C          | 0.277590  | 0.000001  | -0.000411 | C          | -1.534716 | -0.341688 | 0.059370  |
| C          | 1.570473  | -0.000024 | -0.000185 | C          | -1.842691 | 0.974557  | -0.318043 |
| C          | 2.464178  | -0.000246 | -1.243762 | C          | -3.256279 | 1.146362  | -0.353613 |
| C          | 3.848974  | -0.000121 | -0.661794 | C          | -2.854936 | -1.058344 | 0.271020  |
| C          | 3.848713  | 0.000134  | 0.662333  | D          | -1.129900 | 1.731248  | -0.601675 |
| C          | 2.463688  | 0.000242  | 1.243753  | D          | -3.750249 | 2.068625  | -0.622231 |
| D          | 2.279095  | 0.876332  | -1.868674 | D          | -2.938849 | -1.445821 | 1.290117  |
| D          | 2.279113  | -0.877063 | -1.868344 | D          | -2.954155 | -1.917388 | -0.398728 |

|              |           |           |           |              |           |           |           |
|--------------|-----------|-----------|-----------|--------------|-----------|-----------|-----------|
| D            | 4.736029  | -0.000233 | -1.279686 | C            | 1.013136  | -0.421453 | 0.109628  |
| D            | 4.735523  | 0.000263  | 1.280574  | C            | 1.313519  | 0.918905  | 0.385075  |
| D            | 2.278371  | -0.876331 | 1.868603  | C            | 2.077384  | -1.268490 | -0.229670 |
| D            | 2.278354  | 0.877067  | 1.868243  | C            | 2.609984  | 1.392248  | 0.287993  |
| C            | -1.091408 | 0.000001  | -0.000205 | H            | 0.531071  | 1.584087  | 0.719219  |
| C            | -1.828800 | -1.217644 | 0.000057  | C            | 3.371084  | -0.793111 | -0.330367 |
| C            | -1.828800 | 1.217646  | -0.000281 | H            | 1.872928  | -2.313272 | -0.427891 |
| C            | -3.204007 | -1.204400 | 0.000245  | C            | 3.644660  | 0.544114  | -0.078568 |
| H            | -1.287056 | -2.153226 | 0.000110  | H            | 2.816640  | 2.430074  | 0.513197  |
| C            | -3.204006 | 1.204402  | -0.000089 | H            | 4.171073  | -1.467825 | -0.604288 |
| H            | -1.287055 | 2.153228  | -0.000487 | H            | 4.656467  | 0.918108  | -0.153670 |
| C            | -3.905871 | 0.000001  | 0.000176  | C            | -3.878789 | -0.007857 | -0.014628 |
| H            | -3.744989 | -2.141359 | 0.000450  | D            | -4.943912 | -0.168532 | 0.042534  |
| H            | -3.744988 | 2.141362  | -0.000142 | C            | -0.323877 | -0.979809 | 0.192824  |
| H            | -4.986739 | 0.000002  | 0.000325  | D            | -0.361990 | -2.051908 | 0.357282  |
| <b>ts1i3</b> |           |           |           | <b>ts1i2</b> |           |           |           |
| C            | 0.541129  | -0.478928 | -0.168941 | C            | 0.242819  | -0.367381 | -0.066523 |
| C            | 1.541134  | -1.147934 | -0.448694 | C            | -0.958060 | -0.599292 | 0.081435  |
| C            | 3.005422  | -1.186650 | -0.349273 | C            | -2.372094 | -0.827895 | 0.064595  |
| C            | 3.540949  | 0.222965  | -0.212484 | C            | -3.341854 | 0.161053  | -0.038060 |
| C            | 2.831718  | 1.223510  | 0.328696  | C            | -4.734539 | -0.124157 | 0.006602  |
| C            | 1.566612  | 1.062823  | 1.002843  | C            | -5.711589 | 0.794054  | -0.100465 |
| D            | 3.448124  | -1.660036 | -1.226546 | D            | -2.670027 | -1.870376 | 0.082797  |
| D            | 3.291885  | -1.806780 | 0.507454  | D            | -3.024944 | 1.192126  | -0.137779 |
| D            | 4.493723  | 0.429813  | -0.681886 | D            | -5.014656 | -1.167225 | 0.125726  |
| D            | 3.203076  | 2.236213  | 0.205815  | D            | -5.483775 | 1.845547  | -0.222411 |
| D            | 1.496699  | 0.378459  | 1.836652  | D            | -6.753910 | 0.511946  | -0.071631 |
| D            | 0.916876  | 1.925922  | 1.080276  | D            | -1.547858 | -0.758951 | 1.230190  |
| C            | -0.879681 | -0.229332 | -0.114429 | C            | 1.626150  | -0.115989 | -0.038313 |
| C            | -1.741164 | -1.206889 | 0.383383  | C            | 2.113697  | 1.198947  | 0.036082  |
| C            | -1.413905 | 0.979217  | -0.560052 | C            | 2.548718  | -1.173315 | -0.095049 |
| C            | -3.106408 | -0.979598 | 0.428385  | C            | 3.473704  | 1.439118  | 0.056722  |
| H            | -1.328609 | -2.144429 | 0.728868  | H            | 1.412122  | 2.020413  | 0.076426  |
| C            | -2.778661 | 1.201481  | -0.514877 | C            | 3.905781  | -0.917795 | -0.070282 |
| H            | -0.748434 | 1.739324  | -0.945780 | H            | 2.184051  | -2.189028 | -0.158157 |
| C            | -3.629318 | 0.223725  | -0.019489 | C            | 4.377546  | 0.386167  | 0.005000  |
| H            | -3.764065 | -1.746082 | 0.815388  | H            | 3.833102  | 2.457665  | 0.114621  |
| H            | -3.180587 | 2.141405  | -0.867996 | H            | 4.603320  | -1.743426 | -0.112045 |

|               |           |           |           |               |           |           |           |
|---------------|-----------|-----------|-----------|---------------|-----------|-----------|-----------|
| H             | -4.695649 | 0.399856  | 0.017347  | H             | 5.440895  | 0.580224  | 0.021789  |
| <b>tsi1p2</b> |           |           |           | <b>tsi3i4</b> |           |           |           |
| C             | -3.550100 | -0.632289 | -0.102648 | C             | -0.699002 | -0.075753 | 0.394519  |
| C             | -3.485869 | 0.802288  | 0.011752  | C             | -1.398514 | -1.246740 | 0.287669  |
| C             | -4.563401 | 1.588557  | -0.006783 | C             | -1.541409 | 1.146347  | 0.697491  |
| D             | -2.630557 | -2.520834 | -0.247630 | C             | -2.770035 | 1.147674  | -0.181794 |
| D             | -4.532964 | -1.078934 | -0.195701 | C             | -3.334884 | 0.015678  | -0.601309 |
| D             | -2.500190 | 1.241425  | 0.116398  | C             | -2.724996 | -1.256674 | -0.193112 |
| C             | 0.018298  | -0.656561 | -0.030845 | D             | -0.982097 | 2.070066  | 0.561516  |
| D             | -4.480118 | 2.662726  | 0.078895  | D             | -1.852936 | 1.154378  | 1.749845  |
| D             | -5.560021 | 1.176661  | -0.109520 | D             | -3.200440 | 2.104793  | -0.450139 |
| D             | -2.562768 | -2.099297 | 1.863994  | D             | -4.222131 | 0.018803  | -1.219710 |
| C             | -2.478046 | -1.464324 | -0.069515 | D             | -3.349471 | -2.130584 | -0.042960 |
| C             | 1.377160  | -0.224223 | -0.016675 | D             | -1.769998 | -1.803840 | -0.880312 |
| C             | 2.416277  | -1.157013 | -0.041692 | C             | 0.744291  | -0.013707 | 0.187610  |
| C             | 1.686225  | 1.137174  | 0.022934  | C             | 1.502903  | -1.194009 | 0.216678  |
| C             | 3.733245  | -0.733921 | -0.027509 | C             | 1.421536  | 1.184071  | -0.069991 |
| H             | 2.178875  | -2.211112 | -0.071368 | C             | 2.864355  | -1.175418 | -0.013151 |
| C             | -1.128578 | -1.020041 | -0.041581 | H             | 0.998855  | -2.123214 | 0.443185  |
| C             | 3.005614  | 1.552804  | 0.037120  | C             | 2.786475  | 1.199151  | -0.301529 |
| H             | 0.883527  | 1.860993  | 0.042286  | H             | 0.880933  | 2.118718  | -0.113714 |
| C             | 4.032076  | 0.620153  | 0.011862  | C             | 3.517160  | 0.021940  | -0.275256 |
| H             | 4.530382  | -1.464411 | -0.046906 | H             | 3.424409  | -2.100421 | 0.022213  |
| H             | 3.233878  | 2.609382  | 0.067998  | H             | 3.281537  | 2.139142  | -0.505917 |
| H             | 5.062547  | 0.947776  | 0.023038  | H             | 4.584060  | 0.036793  | -0.450955 |
| <b>tsi2i4</b> |           |           |           | <b>tsi2p2</b> |           |           |           |
| C             | -0.536709 | -0.396640 | -0.144780 | C             | -0.043346 | -0.703341 | 0.131083  |
| C             | -1.467024 | -1.246131 | -0.543027 | C             | -1.160598 | -1.153343 | 0.286844  |
| C             | -2.898865 | -1.151667 | -0.328547 | C             | -2.544080 | -1.489381 | 0.186512  |
| C             | -3.586016 | -0.023555 | -0.034423 | C             | -3.521410 | -0.596550 | -0.019406 |
| C             | -2.949704 | 1.228513  | 0.251213  | C             | -3.338722 | 0.835108  | -0.164368 |
| C             | -1.788618 | 1.308895  | 0.938776  | C             | -4.342859 | 1.681218  | -0.375889 |
| D             | -1.153133 | -2.066509 | -1.189834 | D             | -2.794002 | -2.536226 | 0.293235  |
| D             | -3.468651 | -2.031753 | -0.599711 | D             | -4.538317 | -0.966849 | -0.083762 |
| D             | -4.664226 | -0.041864 | -0.144508 | D             | -2.323695 | 1.208760  | -0.094859 |
| D             | -3.382740 | 2.124807  | -0.180237 | D             | -4.173814 | 2.743768  | -0.480090 |
| D             | -1.253550 | 2.244987  | 1.030177  | D             | -5.366532 | 1.334670  | -0.451902 |
| D             | -1.502568 | 0.529734  | 1.628943  | D             | -0.823881 | -2.260906 | 1.858333  |

|                 |           |           |           |                 |           |           |           |
|-----------------|-----------|-----------|-----------|-----------------|-----------|-----------|-----------|
| C               | 0.861815  | -0.199308 | -0.110109 | C               | 1.298639  | -0.247374 | 0.049901  |
| C               | 1.702008  | -1.129691 | 0.530129  | C               | 2.307192  | -1.095355 | -0.417992 |
| C               | 1.445611  | 0.954709  | -0.663706 | C               | 1.628580  | 1.054854  | 0.438097  |
| C               | 3.065912  | -0.918659 | 0.591326  | C               | 3.613140  | -0.647080 | -0.493358 |
| H               | 1.263049  | -2.013305 | 0.972878  | H               | 2.053089  | -2.102301 | -0.717403 |
| C               | 2.809916  | 1.152806  | -0.598332 | C               | 2.936960  | 1.494700  | 0.358144  |
| H               | 0.807272  | 1.681975  | -1.146608 | H               | 0.850764  | 1.710386  | 0.804035  |
| C               | 3.628095  | 0.219942  | 0.028578  | C               | 3.932016  | 0.646912  | -0.107214 |
| H               | 3.697446  | -1.646930 | 1.082312  | H               | 4.386576  | -1.310557 | -0.855154 |
| H               | 3.242765  | 2.041766  | -1.037105 | H               | 3.182402  | 2.503165  | 0.661535  |
| H               | 4.695814  | 0.381802  | 0.081111  | H               | 4.954343  | 0.993878  | -0.168091 |
| <b>tsi4p1</b>   |           |           |           | <b>tsi1i21</b>  |           |           |           |
| C               | 2.842192  | -1.119146 | 0.328878  | C               | -0.252582 | -0.306718 | -0.462730 |
| C               | 3.525381  | 0.011645  | -0.067948 | C               | -1.471754 | -0.375258 | -0.472919 |
| C               | 1.443630  | -1.102547 | 0.415398  | C               | -2.795472 | -0.681370 | -1.059668 |
| C               | 0.720567  | 0.023913  | -0.024972 | C               | -3.892782 | 0.078211  | -0.371060 |
| C               | 1.431425  | 1.151007  | -0.416289 | C               | -3.642153 | 0.627388  | 0.811518  |
| C               | 2.818463  | 1.153849  | -0.426985 | C               | -2.348815 | 0.406516  | 1.452317  |
| D               | 3.380359  | -2.012570 | 0.613468  | D               | -2.971773 | -1.759934 | -0.993312 |
| D               | 4.605956  | 0.007654  | -0.108079 | D               | -2.773513 | -0.443013 | -2.125460 |
| D               | 0.913632  | -2.022636 | 0.621483  | D               | -4.849222 | 0.178358  | -0.866658 |
| D               | 0.892820  | 2.028975  | -0.747773 | D               | -4.385644 | 1.254181  | 1.296058  |
| D               | 3.349487  | 2.040878  | -0.744300 | D               | -1.780682 | 1.253252  | 1.816807  |
| D               | 1.244236  | -0.833550 | 2.238060  | D               | -2.176687 | -0.523185 | 1.979157  |
| C               | -0.757500 | 0.012407  | -0.02303  | C               | 1.136601  | -0.138457 | -0.242659 |
| C               | -1.477200 | 1.119649  | 0.422839  | C               | 1.775112  | 1.056122  | -0.599520 |
| C               | -1.464789 | -1.105789 | -0.46146  | C               | 1.897055  | -1.161719 | 0.337485  |
| C               | -2.862044 | 1.110525  | 0.4272    | C               | 3.129958  | 1.218650  | -0.377783 |
| H               | -0.945059 | 1.986593  | 0.791447  | H               | 1.193597  | 1.848993  | -1.048840 |
| C               | -2.849537 | -1.115304 | -0.458793 | C               | 3.251601  | -0.990163 | 0.554474  |
| H               | -0.925225 | -1.968117 | -0.830647 | H               | 1.410407  | -2.086669 | 0.613857  |
| C               | -3.553619 | -0.006853 | -0.014276 | C               | 3.873876  | 0.198500  | 0.198957  |
| H               | -3.402647 | 1.976401  | 0.78488   | H               | 3.609766  | 2.147053  | -0.656564 |
| H               | -3.380388 | -1.989355 | -0.811146 | H               | 3.826332  | -1.788332 | 1.004460  |
| H               | -4.634979 | -0.014401 | -0.010771 | H               | 4.933547  | 0.329084  | 0.370022  |
| <b>tsi21i22</b> |           |           |           | <b>tsi22p10</b> |           |           |           |
| C               | 0.417689  | -0.577196 | -0.528431 | C               | 1.529818  | -0.340322 | -0.106827 |
| C               | 1.569898  | 0.075328  | -0.580705 | C               | 1.797906  | 0.998583  | 0.418084  |



|           |           |           |           |           |           |           |           |
|-----------|-----------|-----------|-----------|-----------|-----------|-----------|-----------|
| C         | 2.177647  | 1.322657  | -0.018996 | C         | 3.134210  | 1.182084  | 0.429309  |
| C         | 3.297404  | 0.680765  | 0.790995  | C         | 2.848379  | -0.942146 | -0.361755 |
| C         | 3.475604  | -0.621131 | 0.520541  | D         | 1.052336  | 1.684065  | 0.783828  |
| C         | 2.541004  | -1.053466 | -0.530670 | D         | 3.649347  | 2.062799  | 0.781270  |
| D         | 1.474055  | 1.887526  | 0.593795  | D         | 2.995903  | -1.898815 | -0.836377 |
| D         | 2.590435  | 2.006620  | -0.767120 | D         | 2.938342  | -2.091766 | 1.456772  |
| D         | 3.904101  | 1.254824  | 1.477698  | C         | -0.989524 | -0.423853 | -0.183515 |
| D         | 4.243618  | -1.238524 | 0.963149  | C         | -1.304808 | 0.905095  | -0.471901 |
| D         | 2.935689  | -1.472238 | -1.454300 | C         | -2.014118 | -1.276117 | 0.233052  |
| D         | 1.338453  | -1.735738 | -0.425671 | C         | -2.597732 | 1.372726  | -0.311473 |
| C         | -0.975658 | -0.290025 | -0.257580 | H         | -0.537747 | 1.562759  | -0.854949 |
| C         | -1.469408 | 1.013053  | -0.380938 | C         | -3.303880 | -0.805530 | 0.402530  |
| C         | -1.846754 | -1.301889 | 0.144714  | H         | -1.787609 | -2.314409 | 0.439695  |
| C         | -2.792837 | 1.292324  | -0.089840 | C         | -3.598836 | 0.522914  | 0.134219  |
| H         | -0.810969 | 1.801928  | -0.719871 | H         | -2.827167 | 2.403192  | -0.546272 |
| C         | -3.169248 | -1.017260 | 0.438921  | H         | -4.081880 | -1.477098 | 0.738934  |
| H         | -1.472232 | -2.313353 | 0.227014  | H         | -4.608124 | 0.890867  | 0.258207  |
| C         | -3.646698 | 0.279634  | 0.324181  | C         | 3.791677  | -0.010931 | -0.082614 |
| H         | -3.161997 | 2.304158  | -0.190986 | D         | 4.857588  | -0.128446 | -0.198949 |
| H         | -3.831636 | -1.811933 | 0.754638  | C         | 0.362612  | -0.963800 | -0.330577 |
| H         | -4.681378 | 0.499959  | 0.548501  | D         | 0.414786  | -2.005363 | -0.633346 |
| <b>p1</b> |           |           |           | <b>p2</b> |           |           |           |
| C         | -0.423660 | 1.120232  | 2.839667  | C         | 3.565691  | 0.728428  | 0.000000  |
| C         | -0.423520 | 1.119515  | 1.454556  | C         | 3.539427  | -0.721386 | 0.000000  |
| C         | 0.000000  | 0.000000  | 0.740862  | C         | 4.636070  | -1.474159 | 0.000000  |
| C         | 0.423520  | -1.119515 | 1.454556  | D         | 2.615433  | 2.593988  | 0.000000  |
| C         | 0.423660  | -1.120232 | 2.839667  | C         | 2.482676  | 1.519147  | 0.000000  |
| C         | 0.000000  | 0.000000  | 3.537903  | D         | 4.541666  | 1.200214  | 0.000000  |
| D         | -0.763056 | 1.996651  | 3.375196  | C         | 1.143563  | 1.053842  | 0.000000  |
| D         | -0.776231 | 1.990494  | 0.917854  | D         | 2.562081  | -1.190745 | 0.000000  |
| D         | 0.776231  | -1.990494 | 0.917854  | C         | 0.000000  | 0.677226  | 0.000000  |
| D         | 0.763056  | -1.996651 | 3.375196  | D         | 4.580334  | -2.553658 | 0.000000  |
| D         | 0.000000  | 0.000000  | 4.619331  | D         | 5.624726  | -1.031005 | 0.000000  |
| C         | 0.000000  | 0.000000  | -0.740862 | C         | -1.352499 | 0.225500  | 0.000000  |
| C         | -0.423520 | -1.119515 | -1.454556 | C         | -2.405821 | 1.142830  | 0.000000  |
| C         | 0.423520  | 1.119515  | -1.454556 | C         | -1.642004 | -1.140946 | 0.000000  |
| C         | -0.423660 | -1.120232 | -2.839667 | C         | -3.716399 | 0.700122  | 0.000000  |
| H         | -0.776231 | -1.990494 | -0.917854 | H         | -2.184240 | 2.200824  | 0.000000  |

|                |           |           |           |                |           |           |           |
|----------------|-----------|-----------|-----------|----------------|-----------|-----------|-----------|
| C              | 0.423660  | 1.120232  | -2.839667 | C              | -2.955101 | -1.576345 | 0.000000  |
| H              | 0.776231  | 1.990494  | -0.917854 | H              | -0.828622 | -1.853020 | 0.000000  |
| C              | 0.000000  | 0.000000  | -3.537903 | C              | -3.995379 | -0.658792 | 0.000000  |
| H              | -0.763056 | -1.996651 | -3.375196 | H              | -4.524246 | 1.419064  | 0.000000  |
| H              | 0.763056  | 1.996651  | -3.375196 | H              | -3.167565 | -2.636692 | 0.000000  |
| H              | 0.000000  | 0.000000  | -4.619331 | H              | -5.020911 | -1.001775 | 0.000000  |
| <b>p10</b>     |           |           |           | <b>vdW(i1)</b> |           |           |           |
| C              | 1.564511  | -0.378907 | -0.086112 | C              | -2.487581 | -0.270770 | 0.003178  |
| C              | 1.843535  | 0.979970  | 0.390750  | C              | -1.793564 | -1.026550 | -1.031145 |
| C              | 3.179201  | 1.132025  | 0.440248  | C              | -1.190758 | -0.468424 | -2.075614 |
| C              | 2.873636  | -1.007352 | -0.297993 | D              | -3.087891 | -1.901340 | 1.194740  |
| D              | 1.101983  | 1.698393  | 0.696181  | D              | -2.497834 | 0.809126  | -0.109297 |
| D              | 3.705868  | 2.014282  | 0.771102  | D              | -1.779965 | -2.106151 | -0.916252 |
| D              | 3.010771  | -2.015825 | -0.655567 | C              | 0.156511  | 2.139829  | 0.322255  |
| C              | -0.957272 | -0.441056 | -0.161689 | D              | -0.685205 | -1.064169 | -2.822851 |
| C              | -1.261060 | 0.876933  | -0.506693 | D              | -1.188634 | 0.606557  | -2.212080 |
| C              | -1.989529 | -1.265135 | 0.290712  | D              | -3.585192 | -0.227394 | 1.799724  |
| C              | -2.549854 | 1.362531  | -0.366729 | C              | -3.081784 | -0.826733 | 1.054047  |
| H              | -0.487978 | 1.510850  | -0.916599 | C              | 0.897113  | 0.960916  | 0.324181  |
| C              | -3.275377 | -0.776593 | 0.439243  | C              | 1.852396  | 0.715445  | -0.685814 |
| H              | -1.772586 | -2.295871 | 0.541131  | C              | 0.669189  | -0.023442 | 1.308785  |
| C              | -3.558728 | 0.541684  | 0.114381  | C              | 2.545179  | -0.473297 | -0.708498 |
| H              | -2.769927 | 2.384173  | -0.645155 | H              | 2.016457  | 1.473593  | -1.437987 |
| H              | -4.059306 | -1.426493 | 0.803420  | C              | -0.635996 | 3.126907  | 0.224943  |
| H              | -4.564692 | 0.923609  | 0.222215  | C              | 1.365989  | -1.210058 | 1.272961  |
| C              | 3.825247  | -0.106724 | -0.001094 | H              | -0.074837 | 0.166397  | 2.068094  |
| D              | 4.892151  | -0.255577 | -0.063776 | C              | 2.300486  | -1.436275 | 0.266837  |
| C              | 0.390956  | -0.998625 | -0.287726 | H              | 3.273460  | -0.662447 | -1.484283 |
| D              | 0.432121  | -2.050055 | -0.556735 | H              | 1.183922  | -1.967543 | 2.021993  |
| <b>tsi1vdW</b> |           |           |           | H              | 2.842635  | -2.371933 | 0.241509  |
| C              | -2.361482 | -0.633647 | -0.172768 |                |           |           |           |
| C              | -1.423594 | -1.745346 | -0.112333 |                |           |           |           |
| C              | -0.674622 | -2.141438 | -1.136349 |                |           |           |           |
| H              | -3.007922 | -0.692397 | 1.830328  |                |           |           |           |
| H              | -2.448911 | -0.122113 | -1.126131 |                |           |           |           |
| H              | -1.339848 | -2.256766 | 0.841778  |                |           |           |           |
| C              | -0.418187 | 2.045251  | -0.319802 |                |           |           |           |

|            |           |           |           |            |           |           |           |  |
|------------|-----------|-----------|-----------|------------|-----------|-----------|-----------|--|
| H          | 0.019454  | -2.965339 | -1.046732 |            |           |           |           |  |
| H          | -0.736112 | -1.648675 | -2.099155 |            |           |           |           |  |
| H          | -3.737503 | 0.642765  | 0.778948  |            |           |           |           |  |
| C          | -3.075266 | -0.206848 | 0.863662  |            |           |           |           |  |
| C          | 0.598947  | 1.132386  | -0.047965 |            |           |           |           |  |
| C          | 1.449543  | 0.679546  | -1.077515 |            |           |           |           |  |
| C          | 0.770087  | 0.623297  | 1.256104  |            |           |           |           |  |
| C          | 2.43731   | -0.241685 | -0.806025 |            |           |           |           |  |
| H          | 1.307649  | 1.069558  | -2.075187 |            |           |           |           |  |
| C          | -1.397337 | 2.815946  | -0.571412 |            |           |           |           |  |
| C          | 1.75564   | -0.302566 | 1.513698  |            |           |           |           |  |
| H          | 0.104259  | 0.965889  | 2.034843  |            |           |           |           |  |
| C          | 2.589793  | -0.733247 | 0.485937  |            |           |           |           |  |
| H          | 3.089019  | -0.586292 | -1.596352 |            |           |           |           |  |
| H          | 1.881938  | -0.69604  | 2.512419  |            |           |           |           |  |
| H          | 3.362982  | -1.460495 | 0.693842  |            |           |           |           |  |
| <b>i28</b> |           |           |           | <b>i29</b> |           |           |           |  |
| C          | -3.64913  | 0.533346  | -0.492974 | C          | 3.534025  | -0.662731 | -0.557062 |  |
| D          | -3.100907 | -1.490222 | -0.786189 | D          | 3.063262  | 1.367877  | -1.186953 |  |
| D          | -4.723433 | 0.384914  | -0.512163 | D          | 4.595935  | -0.617033 | -0.778691 |  |
| C          | -0.228054 | -0.341175 | -0.050068 | C          | 0.285538  | 0.522773  | 0.203448  |  |
| C          | -2.871897 | -0.69337  | -0.070542 | C          | 2.866242  | 0.651962  | -0.396315 |  |
| C          | 1.188121  | -0.150076 | -0.016125 | C          | -1.053354 | 0.23379   | 0.097033  |  |
| C          | 2.033778  | -0.97777  | -0.756426 | C          | -1.964048 | 1.163771  | -0.470277 |  |
| C          | 1.743777  | 0.869603  | 0.758562  | C          | -1.570756 | -1.006188 | 0.557123  |  |
| C          | 3.403963  | -0.787393 | -0.720553 | C          | -3.302622 | 0.859928  | -0.568195 |  |
| H          | 1.605649  | -1.767604 | -1.357591 | H          | -1.58757  | 2.112977  | -0.824823 |  |
| C          | -1.418455 | -0.496286 | -0.084028 | C          | 1.535028  | 0.758946  | 0.249507  |  |
| C          | 3.114756  | 1.055077  | 0.789543  | C          | -2.913418 | -1.287417 | 0.447961  |  |
| H          | 1.090459  | 1.510637  | 1.333835  | H          | -0.892118 | -1.724254 | 0.996149  |  |
| C          | 3.948473  | 0.228336  | 0.051218  | C          | -3.79136  | -0.36277  | -0.113142 |  |
| H          | 4.04964   | -1.434634 | -1.298272 | H          | -3.980741 | 1.581092  | -1.004586 |  |
| H          | 3.534193  | 1.848298  | 1.393243  | H          | -3.288053 | -2.238029 | 0.803359  |  |
| H          | 5.019532  | 0.375168  | 0.077183  | H          | -4.844485 | -0.592096 | -0.194382 |  |
| C          | -3.290399 | -1.154902 | 1.295783  | C          | 2.711011  | 1.264689  | 0.992995  |  |
| D          | -3.230713 | -2.201021 | 1.556814  | D          | 2.827824  | 2.335801  | 1.094977  |  |
| D          | -3.423837 | -0.423396 | 2.079856  | D          | 3.053642  | 0.672957  | 1.832349  |  |
| C          | -3.137483 | 1.71087   | -0.805364 | C          | 2.942121  | -1.840249 | -0.436919 |  |

|                 |           |           |           |                        |           |           |           |
|-----------------|-----------|-----------|-----------|------------------------|-----------|-----------|-----------|
| D               | -2.068885 | 1.884223  | -0.792529 | D                      | 1.881779  | -1.917902 | -0.231563 |
| D               | -3.776402 | 2.536084  | -1.088349 | D                      | 3.500079  | -2.760405 | -0.542785 |
| <b>tsi28i29</b> |           |           |           | <b>tsi1i29</b>         |           |           |           |
| C               | 3.772347  | -0.465776 | -0.294073 | C                      | -3.169982 | 0.71229   | -0.917223 |
| D               | 3.19341   | 1.522327  | -0.881885 | D                      | -2.703306 | -1.345638 | -1.424159 |
| D               | 4.827606  | -0.271089 | -0.134475 | D                      | -3.115957 | 0.973556  | -1.968148 |
| C               | 0.259422  | 0.330109  | -0.160487 | C                      | -0.209678 | -0.637776 | 0.446571  |
| C               | 2.897349  | 0.741491  | -0.18227  | C                      | -2.785659 | -0.643571 | -0.608213 |
| C               | -1.129923 | 0.120905  | -0.085359 | C                      | 1.120532  | -0.26603  | 0.220737  |
| C               | -2.029985 | 1.09833   | -0.539558 | C                      | 2.05335   | -1.186305 | -0.292916 |
| C               | -1.645484 | -1.074727 | 0.440941  | C                      | 1.557232  | 1.039901  | 0.513326  |
| C               | -3.392264 | 0.882966  | -0.464444 | C                      | 3.363113  | -0.807778 | -0.507401 |
| H               | -1.642727 | 2.021209  | -0.948134 | H                      | 1.729553  | -2.192931 | -0.517805 |
| C               | 1.465518  | 0.559443  | -0.113565 | C                      | -1.426029 | -0.87159  | 0.469875  |
| C               | -3.009998 | -1.277677 | 0.509213  | C                      | 2.871023  | 1.402288  | 0.295507  |
| H               | -0.960135 | -1.832834 | 0.793697  | H                      | 0.847525  | 1.754063  | 0.906834  |
| C               | -3.890959 | -0.303156 | 0.058469  | C                      | 3.781584  | 0.484948  | -0.215231 |
| H               | -4.072713 | 1.646244  | -0.817201 | H                      | 4.067161  | -1.526142 | -0.905363 |
| H               | -3.391343 | -2.203612 | 0.918178  | H                      | 3.190385  | 2.410285  | 0.523658  |
| H               | -4.958176 | -0.466975 | 0.113937  | H                      | 4.809317  | 0.774982  | -0.383914 |
| C               | 2.614213  | 1.263421  | 1.189318  | C                      | -2.795333 | -1.224744 | 0.769374  |
| D               | 2.454797  | 2.31705   | 1.350323  | D                      | -3.007623 | -2.286065 | 0.841689  |
| D               | 2.669031  | 0.588901  | 2.028602  | D                      | -3.284019 | -0.645304 | 1.545776  |
| C               | 3.347518  | -1.691858 | -0.544818 | C                      | -3.547441 | 1.65749   | -0.048844 |
| D               | 2.296578  | -1.899293 | -0.703753 | D                      | -3.610378 | 1.476822  | 1.016555  |
| D               | 4.037151  | -2.522766 | -0.599494 | D                      | -3.798929 | 2.651632  | -0.388499 |
| <b>tsi2p13</b>  |           |           |           | <b>phenylacetylene</b> |           |           |           |
| C               | 0.101434  | -1.460891 | 0.753932  | C                      | 0.000000  | 0.000000  | 2.015547  |
| C               | 1.139741  | -2.041497 | 0.982014  | C                      | 0.000000  | 0.000000  | 3.213755  |
| C               | 2.786023  | -1.254322 | -0.557276 | C                      | 0.000000  | 0.000000  | 0.585581  |
| C               | 3.011488  | 0.032445  | -0.70307  | C                      | 0.000000  | 1.204314  | -0.119421 |
| C               | 2.411087  | 1.098914  | 0.092845  | C                      | 0.000000  | -1.204314 | -0.119421 |
| C               | 2.649022  | 2.390094  | -0.109692 | C                      | 0.000000  | 1.200407  | -1.503092 |
| D               | 1.859991  | -2.700056 | 1.403917  | H                      | 0.000000  | 2.136697  | 0.427380  |
| D               | 3.707226  | 0.353881  | -1.481575 | C                      | 0.000000  | -1.200407 | -1.503092 |
| D               | 1.739334  | 0.786726  | 0.882657  | H                      | 0.000000  | -2.136697 | 0.427380  |
| D               | 3.316425  | 2.725438  | -0.894619 | C                      | 0.000000  | 0.000000  | -2.197833 |
| C               | -1.019504 | -0.681069 | 0.361153  | H                      | 0.000000  | 2.138144  | -2.041662 |

|            |           |           |           |   |          |           |           |
|------------|-----------|-----------|-----------|---|----------|-----------|-----------|
| C          | -1.78874  | -1.054553 | -0.744519 | H | 0.000000 | -2.138144 | -2.041662 |
| C          | -1.358914 | 0.476245  | 1.068008  | H | 0.000000 | 0.000000  | -3.279220 |
| C          | -2.869849 | -0.284275 | -1.131594 | D | 0.000000 | 0.000000  | 4.275628  |
| H          | -1.525395 | -1.947652 | -1.293302 |   |          |           |           |
| C          | -2.441026 | 1.241117  | 0.672872  |   |          |           |           |
| H          | -0.767124 | 0.765248  | 1.925418  |   |          |           |           |
| C          | -3.199229 | 0.864343  | -0.426258 |   |          |           |           |
| H          | -3.457786 | -0.580132 | -1.989602 |   |          |           |           |
| H          | -2.694205 | 2.135702  | 1.225086  |   |          |           |           |
| H          | -4.044802 | 1.4647    | -0.732544 |   |          |           |           |
| D          | 2.18299   | 3.151549  | 0.499868  |   |          |           |           |
| D          | 3.15415   | -2.114704 | -1.095801 |   |          |           |           |
| <b>p13</b> |           |           |           |   |          |           |           |
| C          | -1.888814 | -0.192403 | 0.000026  |   |          |           |           |
| C          | -0.688411 | 0.330657  | -0.000303 |   |          |           |           |
| C          | 0.562491  | -0.424617 | 0.000232  |   |          |           |           |
| C          | 1.762344  | 0.144871  | -0.000012 |   |          |           |           |
| D          | -0.593457 | 1.419878  | 0.001434  |   |          |           |           |
| D          | 0.473221  | -1.504492 | 0.000252  |   |          |           |           |
| D          | 1.875716  | 1.222231  | -0.000461 |   |          |           |           |
| D          | 2.666794  | -0.44682  | -0.000462 |   |          |           |           |
| D          | -2.907933 | 0.15816   | -0.000418 |   |          |           |           |
| C          | -1.888814 | -0.192403 | 0.000026  |   |          |           |           |
| C          | -0.688411 | 0.330657  | -0.000303 |   |          |           |           |
| C          | 0.562491  | -0.424617 | 0.000232  |   |          |           |           |
| C          | 1.762344  | 0.144871  | -0.000012 |   |          |           |           |
| D          | -0.593457 | 1.419878  | 0.001434  |   |          |           |           |
| D          | 0.473221  | -1.504492 | 0.000252  |   |          |           |           |
| D          | 1.875716  | 1.222231  | -0.000461 |   |          |           |           |
| D          | 2.666794  | -0.44682  | -0.000462 |   |          |           |           |
| D          | -2.907933 | 0.15816   | -0.000418 |   |          |           |           |

(b)

| Atom                 | X         | Y         | Z         | Atom            | X         | Y         | Z         |
|----------------------|-----------|-----------|-----------|-----------------|-----------|-----------|-----------|
| <b>phenylethynyl</b> |           |           |           | <b>Isoprene</b> |           |           |           |
| C                    | 0.000000  | 0.000000  | 2.063239  | C               | 0.000000  | 0.525818  | 0.000000  |
| C                    | 0.000000  | 0.000000  | 3.335500  | H               | -1.663021 | 1.821120  | 0.000000  |
| C                    | 0.000000  | 0.000000  | 0.669896  | C               | -0.584876 | 1.722862  | 0.000000  |
| C                    | 0.000000  | 1.216831  | -0.046161 | C               | -0.825145 | -0.686586 | 0.000000  |
| C                    | 0.000000  | -1.216831 | -0.046161 | H               | -0.006327 | 2.637143  | 0.000000  |
| C                    | 0.000000  | 1.210125  | -1.423103 | C               | -0.369048 | -1.934462 | 0.000000  |
| H                    | 0.000000  | 2.143623  | 0.509225  | H               | -1.897584 | -0.520810 | 0.000000  |
| C                    | 0.000000  | -1.210125 | -1.423103 | H               | -1.047892 | -2.775807 | 0.000000  |
| H                    | 0.000000  | -2.143623 | 0.509225  | H               | 0.689154  | -2.161359 | 0.000000  |
| C                    | 0.000000  | 0.000000  | -2.111120 | C               | 1.493244  | 0.374837  | 0.000000  |
| H                    | 0.000000  | 2.142392  | -1.969839 | H               | 1.828042  | -0.180338 | 0.878386  |
| H                    | 0.000000  | -2.142392 | -1.969839 | H               | 1.828042  | -0.180338 | -0.878386 |
| H                    | 0.000000  | 0.000000  | -3.192694 | H               | 1.984536  | 1.345575  | 0.000000  |
| <b>i5</b>            |           |           |           | <b>i7</b>       |           |           |           |
| C                    | -2.77966  | 0.294927  | -0.241365 | C               | -0.295647 | 0.317431  | 0.000037  |
| H                    | -2.221856 | -1.023065 | 1.352836  | C               | -0.844078 | 1.510937  | 0.000160  |
| C                    | -1.954315 | -0.832335 | 0.307158  | C               | -1.234859 | -0.875699 | -0.000037 |
| C                    | -4.16771  | 0.333492  | -0.171885 | C               | -2.698559 | -0.524410 | -0.000149 |
| C                    | 0.660936  | -0.385466 | 0.148921  | C               | -3.144372 | 0.725295  | -0.000124 |
| H                    | -2.1899   | -1.764433 | -0.221053 | C               | -2.248070 | 1.939851  | -0.000021 |
| C                    | -4.869056 | 1.390611  | -0.704551 | H               | -1.023407 | -1.506840 | 0.871203  |
| H                    | -5.94803  | 1.432145  | -0.657795 | H               | -1.023236 | -1.506856 | -0.871221 |
| H                    | -4.355435 | 2.211543  | -1.186305 | H               | -2.461885 | 2.564736  | -0.873123 |
| C                    | -0.517969 | -0.59532  | 0.223291  | H               | -2.462158 | 2.564819  | 0.872947  |
| C                    | 2.066763  | -0.13622  | 0.063924  | C               | 1.165029  | 0.084172  | 0.000066  |
| C                    | 2.926735  | -1.099982 | -0.464887 | C               | 1.698719  | -1.202387 | 0.000511  |
| C                    | 2.597923  | 1.075447  | 0.508791  | C               | 2.053202  | 1.163314  | -0.00037  |
| C                    | 4.286395  | -0.854826 | -0.545105 | C               | 3.071887  | -1.405527 | 0.000541  |
| H                    | 2.518129  | -2.039151 | -0.81072  | H               | 1.044765  | -2.063109 | 0.000844  |
| C                    | 3.958352  | 1.314955  | 0.425177  | C               | 3.419069  | 0.962341  | -0.000333 |
| H                    | 1.933936  | 1.823351  | 0.919155  | H               | 1.653055  | 2.16919   | -0.000751 |
| C                    | 4.806347  | 0.351889  | -0.101161 | C               | 3.937754  | -0.326872 | 0.000125  |
| H                    | 4.943047  | -1.609281 | -0.956515 | H               | 3.461987  | -2.41454  | 0.000895  |
| H                    | 4.358264  | 2.257672  | 0.772997  | H               | 4.086011  | 1.814136  | -0.000675 |
| H                    | 5.869137  | 0.54117   | -0.16514  | H               | 5.007612  | -0.484744 | 0.000147  |
| H                    | -2.254503 | 1.107891  | -0.724837 | H               | -4.212236 | 0.914952  | -0.000184 |
| C                    | -4.908282 | -0.79863  | 0.495534  | C               | -3.627879 | -1.701677 | -0.000269 |

|            |           |           |           |            |           |           |           |
|------------|-----------|-----------|-----------|------------|-----------|-----------|-----------|
| H          | -4.685087 | -1.753409 | 0.015858  | H          | -4.671566 | -1.392002 | -0.00032  |
| H          | -4.622109 | -0.891534 | 1.544957  | H          | -3.456006 | -2.330135 | -0.8776   |
| H          | -5.984338 | -0.644158 | 0.453516  | H          | -3.456119 | -2.330227 | 0.877018  |
| <b>i6</b>  |           |           |           | <b>i8</b>  |           |           |           |
| C          | -0.109424 | 1.003074  | -0.385485 | C          | -0.322940 | 0.346360  | -0.063819 |
| C          | 0.921634  | 1.685872  | -0.787079 | C          | -0.857894 | 1.607920  | -0.182945 |
| C          | 2.290908  | 1.684969  | -0.244573 | C          | -1.251437 | -0.833998 | 0.009682  |
| C          | 3.084057  | 0.707199  | 0.208044  | C          | -2.713469 | -0.512499 | 0.072885  |
| C          | 2.938498  | -0.751880 | 0.251255  | C          | -3.143653 | 0.764255  | -0.028930 |
| C          | 3.881271  | -1.452884 | 0.885075  | C          | -2.232285 | 1.839920  | -0.178494 |
| H          | 0.753280  | 2.430045  | -1.569874 | H          | -0.200559 | 2.459187  | -0.294724 |
| H          | 2.721013  | 2.681225  | -0.217544 | H          | -0.982585 | -1.466459 | 0.867793  |
| H          | 3.841590  | -2.532789 | 0.938409  | H          | -1.088296 | -1.492060 | -0.859440 |
| H          | 4.716557  | -0.966612 | 1.372403  | H          | -2.605734 | 2.848685  | -0.280894 |
| C          | -1.348374 | 0.454779  | -0.168504 | C          | 1.120575  | 0.099994  | -0.025157 |
| C          | -1.767405 | -0.711779 | -0.864029 | C          | 2.041396  | 1.127097  | 0.22944   |
| C          | -2.238966 | 1.014861  | 0.787068  | C          | 1.638942  | -1.185376 | -0.226726 |
| C          | -3.00152  | -1.267544 | -0.61566  | C          | 3.400632  | 0.884848  | 0.257966  |
| H          | -1.102364 | -1.151973 | -1.593592 | H          | 1.689505  | 2.128358  | 0.432716  |
| C          | -3.46789  | 0.440852  | 1.016702  | C          | 3.002553  | -1.427344 | -0.198716 |
| H          | -1.933097 | 1.898969  | 1.328475  | H          | 0.972964  | -2.013532 | -0.421522 |
| C          | -3.86146  | -0.701625 | 0.322752  | C          | 3.893523  | -0.39496  | 0.040424  |
| H          | -3.304701 | -2.152908 | -1.158243 | H          | 4.082465  | 1.699658  | 0.46189   |
| H          | -4.133769 | 0.88356   | 1.74523   | H          | 3.368527  | -2.431587 | -0.365938 |
| H          | -4.828324 | -1.146273 | 0.511647  | H          | 4.957936  | -0.583491 | 0.065316  |
| H          | 4.041145  | 1.043594  | 0.593469  | H          | -4.206028 | 0.973802  | 0.002283  |
| C          | 1.798749  | -1.453579 | -0.428943 | C          | -3.638001 | -1.674941 | 0.226335  |
| H          | 0.866383  | -1.307941 | 0.115659  | H          | -3.507786 | -2.387435 | -0.59356  |
| H          | 1.646786  | -1.069872 | -1.437742 | H          | -3.427501 | -2.221198 | 1.150176  |
| H          | 1.995039  | -2.522906 | -0.488038 | H          | -4.680564 | -1.361587 | 0.244236  |
| <b>i23</b> |           |           |           | <b>i24</b> |           |           |           |
| C          | -3.312606 | -0.067507 | 1.074020  | C          | 2.889515  | 1.229129  | -0.000043 |
| H          | -1.649814 | 0.736356  | 2.206906  | H          | 0.973161  | 1.679659  | 0.878017  |
| C          | -1.888470 | -0.099415 | 1.544991  | C          | 1.394818  | 1.182047  | -0.000009 |
| C          | -3.430931 | 0.015853  | -0.244694 | C          | 3.401183  | -0.026148 | -0.000014 |
| C          | 0.192204  | -0.009574 | 0.132865  | C          | -0.130798 | -0.941365 | 0.000030  |
| H          | -1.651904 | -1.013441 | 2.094745  | H          | 0.973110  | 1.679646  | -0.878015 |
| C          | -2.087144 | 0.056844  | -0.923547 | C          | 2.321580  | -0.962592 | 0.000023  |
| C          | -1.096215 | -0.016352 | 0.237209  | C          | 1.089638  | -0.300066 | 0.000017  |

|           |           |           |           |            |           |           |           |
|-----------|-----------|-----------|-----------|------------|-----------|-----------|-----------|
| C         | 1.556381  | -0.001899 | 0.024160  | C          | -1.474618 | -0.413271 | 0.000017  |
| C         | 2.292482  | -1.212893 | -0.111504 | C          | -2.539811 | -1.330675 | -0.000022 |
| C         | 2.291146  | 1.217340  | 0.041867  | C          | -1.806086 | 0.951556  | 0.000041  |
| C         | 3.663037  | -1.191935 | -0.220695 | C          | -3.856034 | -0.914594 | -0.000004 |
| H         | 1.753043  | -2.149694 | -0.126941 | H          | -2.315238 | -2.389958 | -0.000038 |
| C         | 3.661726  | 1.211814  | -0.068995 | C          | -3.125975 | 1.365076  | 0.000023  |
| H         | 1.750791  | 2.148089  | 0.144355  | H          | -1.031601 | 1.700821  | 0.000078  |
| C         | 4.362164  | 0.013894  | -0.201083 | C          | -4.159797 | 0.440177  | -0.000018 |
| H         | 4.202569  | -2.124115 | -0.322945 | H          | -4.650537 | -1.648784 | -0.000071 |
| H         | 4.200314  | 2.150023  | -0.053146 | H          | -3.349816 | 2.423622  | 0.000043  |
| H         | 5.439511  | 0.019958  | -0.287579 | H          | -5.189303 | 0.770661  | -0.000033 |
| H         | -4.149389 | -0.109684 | 1.758788  | H          | 3.46184   | 2.144837  | -0.000081 |
| C         | -4.691846 | 0.067729  | -1.038005 | C          | 4.846375  | -0.406099 | -0.000005 |
| H         | -5.570427 | 0.029605  | -0.395741 | H          | 5.486392  | 0.474601  | -0.000212 |
| H         | -4.739306 | 0.983535  | -1.632007 | H          | 5.091236  | -1.005423 | 0.878436  |
| H         | -4.742898 | -0.76724  | -1.740875 | H          | 5.091157  | -1.005784 | -0.878221 |
| H         | -1.956182 | 0.971579  | -1.507927 | H          | -0.077195 | -2.025276 | 0.000045  |
| H         | -1.957871 | -0.77837  | -1.617173 | H          | 2.436858  | -2.037666 | 0.000044  |
| <b>i9</b> |           |           |           | <b>i11</b> |           |           |           |
| C         | 3.171096  | -0.248427 | 0.059236  | C          | 0.203840  | -0.019945 | 0.000143  |
| H         | 2.355688  | -2.197282 | -0.212941 | C          | 0.936762  | -1.109802 | 0.000503  |
| C         | 2.168401  | -1.316705 | 0.413109  | C          | 0.946759  | 1.305198  | -0.000264 |
| C         | 2.795317  | 1.013701  | -0.374767 | C          | 2.438584  | 1.162705  | -0.000420 |
| C         | -0.393292 | -0.643944 | 0.206351  | C          | 3.110380  | 0.018889  | -0.000071 |
| H         | 2.361566  | -1.653527 | 1.438862  | C          | 2.389329  | -1.315242 | 0.000520  |
| C         | 3.657581  | 2.027958  | -0.709996 | H          | 0.639204  | 1.893311  | 0.871443  |
| H         | 1.731429  | 1.207328  | -0.453789 | H          | 0.638933  | 1.892916  | -0.872140 |
| H         | 3.281899  | 2.984626  | -1.041820 | H          | 2.997601  | 2.092558  | -0.000842 |
| H         | 4.731533  | 1.911297  | -0.656685 | H          | 2.701217  | -1.899936 | -0.872030 |
| C         | 0.763648  | -0.948772 | 0.297881  | H          | 2.701312  | -1.899224 | 0.873512  |
| C         | -1.770258 | -0.272788 | 0.099565  | C          | -1.27466  | -0.0222   | 0.000063  |
| C         | -2.625439 | -0.959832 | -0.763293 | C          | -1.979596 | -1.228958 | -0.000344 |
| C         | -2.276357 | 0.785034  | 0.856646  | C          | -2.006674 | 1.162841  | 0.000373  |
| C         | -3.956602 | -0.595202 | -0.863913 | C          | -3.359965 | -1.248291 | -0.000391 |
| H         | -2.235549 | -1.778725 | -1.351468 | H          | -1.424032 | -2.158096 | -0.000636 |
| C         | -3.608265 | 1.145491  | 0.750663  | C          | -3.394489 | 1.144451  | 0.000322  |
| H         | -1.615567 | 1.318212  | 1.525812  | H          | -1.498044 | 2.116648  | 0.000674  |
| C         | -4.45193  | 0.457311  | -0.10854  | C          | -4.077447 | -0.058348 | -0.000056 |
| H         | -4.610177 | -1.134902 | -1.535612 | H          | -3.882698 | -2.195478 | -0.000709 |



|            |           |           |           |            |           |           |           |
|------------|-----------|-----------|-----------|------------|-----------|-----------|-----------|
| H          | -3.989248 | 1.967005  | 1.341881  | H          | -3.940461 | 2.078376  | 0.000575  |
| H          | -5.492446 | 0.740512  | -0.189392 | H          | -5.158763 | -0.073031 | -0.000102 |
| C          | 4.609366  | -0.637116 | 0.205064  | C          | 4.606107  | -0.055949 | -0.000214 |
| H          | 5.145536  | -0.539866 | -0.742284 | H          | 4.967509  | -0.598113 | -0.877551 |
| H          | 5.122626  | 0.003053  | 0.9273    | H          | 5.056921  | 0.935257  | -0.000735 |
| H          | 4.713102  | -1.668001 | 0.542104  | H          | 4.967714  | -0.597282 | 0.877554  |
| <b>i10</b> |           |           |           | <b>i12</b> |           |           |           |
| C          | 0.158454  | -1.141894 | -0.393634 | C          | 0.236826  | -0.038454 | -0.040259 |
| C          | -0.969687 | -1.752558 | -0.616851 | C          | 0.975346  | -1.190107 | -0.200917 |
| C          | -2.323976 | -1.341376 | -0.220425 | C          | 0.962745  | 1.270202  | 0.095982  |
| C          | -2.792583 | -0.109731 | 0.037386  | C          | 2.450412  | 1.162884  | 0.157078  |
| C          | -1.970800 | 1.090767  | -0.108883 | C          | 3.114679  | -0.002075 | 0.016230  |
| C          | -2.318828 | 2.313174  | 0.283457  | C          | 2.366114  | -1.200972 | -0.187222 |
| H          | -0.925487 | -2.712196 | -1.135370 | H          | 0.466870  | -2.132018 | -0.355765 |
| H          | -3.023632 | -2.166592 | -0.144636 | H          | 0.593665  | 1.807809  | 0.979848  |
| H          | -1.008196 | 0.959164  | -0.586027 | H          | 0.695157  | 1.930468  | -0.743614 |
| H          | -1.657630 | 3.153663  | 0.124725  | H          | 3.000466  | 2.084399  | 0.306207  |
| H          | -3.258302 | 2.519334  | 0.779459  | H          | 2.893061  | -2.135863 | -0.325324 |
| C          | 1.37832   | -0.564046 | -0.179331 | C          | -1.227053 | -0.035217 | -0.015624 |
| C          | 1.92366   | 0.366092  | -1.108952 | C          | -1.969897 | -1.21192  | 0.162097  |
| C          | 2.136692  | -0.856365 | 0.989171  | C          | -1.947043 | 1.158369  | -0.15396  |
| C          | 3.14477   | 0.953895  | -0.8744   | C          | -3.350653 | -1.196211 | 0.178751  |
| H          | 1.362285  | 0.599543  | -2.003111 | H          | -1.461667 | -2.153409 | 0.313385  |
| C          | 3.3555    | -0.2555   | 1.198443  | C          | -3.331876 | 1.173059  | -0.137771 |
| H          | 1.735688  | -1.556937 | 1.707888  | H          | -1.423171 | 2.093685  | -0.288284 |
| C          | 3.872366  | 0.652211  | 0.275219  | C          | -4.04415  | -0.003044 | 0.025405  |
| H          | 3.542619  | 1.657543  | -1.593357 | H          | -3.89189  | -2.121846 | 0.322428  |
| H          | 3.917394  | -0.491263 | 2.092292  | H          | -3.855623 | 2.112453  | -0.254352 |
| H          | 4.831127  | 1.11943   | 0.450157  | H          | -5.125246 | 0.007869  | 0.040817  |
| C          | -4.219027 | 0.069899  | 0.474087  | C          | 4.613867  | -0.080759 | 0.063689  |
| H          | -4.266076 | 0.499496  | 1.477232  | H          | 4.94273   | -0.738506 | 0.870288  |
| H          | -4.750029 | 0.751741  | -0.192485 | H          | 5.009981  | -0.489551 | -0.867714 |
| H          | -4.748932 | -0.880344 | 0.491502  | H          | 5.059768  | 0.899989  | 0.221202  |
| <b>i25</b> |           |           |           |            |           |           |           |
| C          | 3.395349  | -0.902259 | -0.000089 |            |           |           |           |
| C          | 2.187316  | -1.648396 | 0.000161  |            |           |           |           |
| C          | 3.130464  | 0.429483  | -0.000206 |            |           |           |           |
| C          | -0.226962 | -1.200388 | 0.000277  |            |           |           |           |
| H          | 2.116828  | -2.726102 | 0.000275  |            |           |           |           |

|               |           |           |           |               |           |           |           |
|---------------|-----------|-----------|-----------|---------------|-----------|-----------|-----------|
| C             | 1.641477  | 0.624992  | 0.000021  |               |           |           |           |
| C             | 1.082676  | -0.781672 | 0.000211  |               |           |           |           |
| C             | -1.459880 | -0.446365 | 0.000180  |               |           |           |           |
| C             | -2.668087 | -1.164491 | -0.000443 |               |           |           |           |
| C             | -1.549644 | 0.954935  | 0.000692  |               |           |           |           |
| C             | -3.892178 | -0.526155 | -0.000613 |               |           |           |           |
| H             | -2.630984 | -2.246689 | -0.000817 |               |           |           |           |
| C             | -2.777773 | 1.591735  | 0.00053   |               |           |           |           |
| H             | -0.65732  | 1.559028  | 0.001277  |               |           |           |           |
| C             | -3.956441 | 0.860735  | -0.000137 |               |           |           |           |
| H             | -4.801951 | -1.111501 | -0.001115 |               |           |           |           |
| H             | -2.814194 | 2.673111  | 0.000946  |               |           |           |           |
| H             | -4.912951 | 1.364912  | -0.000264 |               |           |           |           |
| C             | 4.095016  | 1.560394  | -0.00044  |               |           |           |           |
| H             | 5.124163  | 1.204294  | -0.000717 |               |           |           |           |
| H             | 3.955725  | 2.198392  | -0.877344 |               |           |           |           |
| H             | 3.956195  | 2.198356  | 0.876569  |               |           |           |           |
| H             | 1.316826  | 1.191454  | 0.878044  |               |           |           |           |
| H             | 1.316422  | 1.191458  | -0.877843 |               |           |           |           |
| H             | -0.362654 | -2.277134 | 0.000297  |               |           |           |           |
| H             | 4.385907  | -1.334862 | -0.000182 |               |           |           |           |
| <b>tsi5i7</b> |           |           |           | <b>tsi5i6</b> |           |           |           |
| C             | 0.141849  | -0.777004 | 0.269432  | C             | 0.688297  | -0.278751 | -0.086584 |
| C             | 1.060337  | -1.597685 | 0.334905  | C             | -0.523057 | -0.455048 | 0.047364  |
| C             | 2.517178  | -1.739993 | 0.447596  | C             | -1.947709 | -0.611608 | 0.017275  |
| C             | 3.192601  | -0.506166 | -0.113215 | C             | -2.855177 | 0.435522  | -0.073467 |
| C             | 2.636350  | 0.714452  | -0.110278 | C             | -4.278334 | 0.279158  | -0.030392 |
| C             | 1.403490  | 1.004763  | 0.599543  | C             | -5.085124 | 1.354682  | -0.127526 |
| H             | 2.867776  | -2.621306 | -0.090555 | H             | -2.289750 | -1.639115 | 0.006719  |
| H             | 2.780172  | -1.901937 | 1.498646  | H             | -4.679157 | 2.352249  | -0.232786 |
| H             | 1.350493  | 0.803101  | 1.660594  | H             | -6.161629 | 1.256463  | -0.107408 |
| H             | 0.821175  | 1.858577  | 0.271509  | H             | -1.133774 | -0.618880 | 1.190241  |
| C             | -1.227649 | -0.353898 | 0.110639  | C             | 2.082431  | -0.096783 | -0.044425 |
| C             | -1.828844 | 0.508755  | 1.026685  | C             | 2.633403  | 1.190085  | 0.067625  |
| C             | -1.973808 | -0.813311 | -0.975197 | C             | 2.95245   | -1.196298 | -0.123945 |
| C             | -3.146559 | 0.898293  | 0.862609  | C             | 4.0034    | 1.362519  | 0.10235   |
| H             | -1.257142 | 0.869107  | 1.870713  | H             | 1.972566  | 2.043648  | 0.125687  |
| C             | -3.292014 | -0.421741 | -1.134525 | C             | 4.320276  | -1.008686 | -0.084636 |
| H             | -1.508206 | -1.479844 | -1.687446 | H             | 2.538748  | -2.190801 | -0.216042 |

|                |           |           |           |               |           |           |           |
|----------------|-----------|-----------|-----------|---------------|-----------|-----------|-----------|
| C              | -3.882524 | 0.435141  | -0.218046 | C             | 4.854866  | 0.268059  | 0.027931  |
| H              | -3.601434 | 1.565244  | 1.582321  | H             | 4.411956  | 2.360267  | 0.189355  |
| H              | -3.859905 | -0.786477 | -1.979669 | H             | 4.976816  | -1.86625  | -0.144137 |
| H              | -4.91189  | 0.741158  | -0.345172 | H             | 5.926319  | 0.409037  | 0.056027  |
| C              | 3.23926   | 1.846224  | -0.902268 | C             | -4.858692 | -1.102466 | 0.113897  |
| H              | 3.510675  | 2.683528  | -0.257146 | H             | -4.566979 | -1.742066 | -0.721622 |
| H              | 4.128812  | 1.525596  | -1.442647 | H             | -4.508913 | -1.582685 | 1.030064  |
| H              | 2.515663  | 2.222343  | -1.62933  | H             | -5.945418 | -1.065811 | 0.1453    |
| H              | 4.125813  | -0.666063 | -0.639098 | H             | -2.462962 | 1.441643  | -0.154197 |
| <b>tsi5i23</b> |           |           |           | <b>tsi5p4</b> |           |           |           |
| C              | -3.401272 | 0.703200  | -0.463594 | C             | -2.149100 | -1.633131 | -0.005432 |
| H              | -2.121872 | 2.041383  | -1.548814 | C             | -3.299721 | -0.917120 | -0.098852 |
| C              | -2.211979 | 1.615677  | -0.546794 | C             | -0.816495 | -1.139383 | 0.002897  |
| C              | -3.299840 | -0.439714 | 0.209947  | C             | -3.511107 | 0.519239  | -0.047174 |
| C              | 0.246016  | 0.700179  | -0.230864 | C             | 0.331868  | -0.781706 | -0.005574 |
| H              | -2.322781 | 2.465734  | 0.134875  | C             | -4.765353 | 0.975437  | -0.155902 |
| C              | -2.046177 | -0.706169 | 0.922135  | H             | -2.229352 | -2.706136 | -0.131286 |
| C              | -0.957063 | 0.903493  | -0.219973 | H             | -4.985886 | 2.033842  | -0.122656 |
| C              | 1.596337  | 0.283516  | -0.125810 | C             | 1.674811  | -0.303179 | -0.011860 |
| C              | 2.402419  | 0.730925  | 0.928393  | H             | -5.602305 | 0.301023  | -0.282342 |
| C              | 2.149348  | -0.585945 | -1.074362 | H             | -2.207592 | -2.131451 | 1.952404  |
| C              | 3.717921  | 0.317368  | 1.028218  | C             | 2.749423  | -1.192449 | -0.075724 |
| H              | 1.982088  | 1.403519  | 1.663034  | C             | 1.929463  | 1.069062  | 0.04697   |
| C              | 3.465576  | -0.994827 | -0.965742 | C             | 4.048313  | -0.716176 | -0.081141 |
| H              | 1.532385  | -0.933477 | -1.891231 | H             | 2.554093  | -2.254651 | -0.120159 |
| C              | 4.255306  | -0.546121 | 0.083772  | C             | 3.230879  | 1.537908  | 0.041241  |
| H              | 4.328594  | 0.670226  | 1.848252  | H             | 1.098207  | 1.758549  | 0.098095  |
| H              | 3.878979  | -1.667972 | -1.704583 | C             | 4.293129  | 0.648037  | -0.02294  |
| H              | 5.284631  | -0.867284 | 0.164857  | H             | 4.873824  | -1.412963 | -0.130629 |
| H              | -4.310956 | 0.987642  | -0.977616 | H             | 3.417259  | 2.602142  | 0.087348  |
| C              | -4.388296 | -1.474065 | 0.257964  | H             | 5.309636  | 1.016861  | -0.027171 |
| H              | -5.249893 | -1.17384  | -0.337587 | C             | -2.357806 | 1.464523  | 0.133884  |
| H              | -4.020422 | -2.428388 | -0.125731 | H             | -1.800005 | 1.230103  | 1.040806  |
| H              | -4.718087 | -1.649909 | 1.283602  | H             | -1.656547 | 1.3897    | -0.697096 |
| H              | -1.559502 | -1.665986 | 0.79408   | H             | -2.714838 | 2.49075   | 0.198185  |
| H              | -1.872931 | -0.226748 | 1.877122  | H             | -4.206324 | -1.504154 | -0.187857 |
| <b>tsi7i8</b>  |           |           |           | <b>tsi6i8</b> |           |           |           |
| C              | 0.331350  | 0.400275  | 0.426116  | C             | -0.137825 | -0.648674 | -0.140973 |
| C              | 0.837359  | 1.663742  | 0.266358  | C             | -0.950850 | -1.581055 | -0.602075 |

|               |           |           |           |               |           |           |           |
|---------------|-----------|-----------|-----------|---------------|-----------|-----------|-----------|
| C             | 1.348659  | -0.650593 | 0.811030  | C             | -2.379682 | -1.696727 | -0.358326 |
| C             | 2.598778  | -0.524211 | -0.038010 | C             | -3.198758 | -0.699609 | 0.037535  |
| C             | 2.975243  | 0.669434  | -0.505547 | C             | -2.724101 | 0.617009  | 0.391787  |
| C             | 2.158679  | 1.846355  | -0.191561 | C             | -1.583103 | 0.742424  | 1.108257  |
| H             | 0.945328  | -1.658430 | 0.717508  | H             | -0.544921 | -2.299801 | -1.314903 |
| H             | 1.633244  | -0.557086 | 1.867501  | H             | -2.833166 | -2.627586 | -0.676070 |
| H             | 2.635373  | 2.815376  | -0.088192 | H             | -1.140350 | 1.713601  | 1.292028  |
| H             | 1.154959  | 2.193245  | -0.933559 | H             | -1.234085 | -0.065932 | 1.732291  |
| C             | -1.077119 | 0.095090  | 0.201378  | C             | 1.220035  | -0.258582 | -0.112720 |
| C             | -2.011656 | 1.139761  | 0.12406   | C             | 2.197265  | -1.098529 | 0.453273  |
| C             | -1.553227 | -1.210331 | 0.028271  | C             | 1.62281   | 0.999746  | -0.595861 |
| C             | -3.346156 | 0.889962  | -0.126584 | C             | 3.518843  | -0.699838 | 0.510578  |
| H             | -1.665144 | 2.151155  | 0.284701  | H             | 1.897557  | -2.062213 | 0.841885  |
| C             | -2.892001 | -1.457371 | -0.224121 | C             | 2.94669   | 1.385412  | -0.535433 |
| H             | -0.874347 | -2.05005  | 0.069958  | H             | 0.877725  | 1.658871  | -1.02029  |
| C             | -3.797477 | -0.411477 | -0.304024 | C             | 3.902398  | 0.540612  | 0.017335  |
| H             | -4.0438   | 1.71558   | -0.174209 | H             | 4.257525  | -1.360963 | 0.943729  |
| H             | -3.228678 | -2.476458 | -0.360733 | H             | 3.239683  | 2.353231  | -0.919809 |
| H             | -4.843524 | -0.607213 | -0.495964 | H             | 4.937494  | 0.849052  | 0.0665    |
| H             | 3.876673  | 0.781388  | -1.094294 | C             | -3.464424 | 1.797904  | -0.167204 |
| C             | 3.377636  | -1.778115 | -0.270985 | H             | -3.441442 | 1.797647  | -1.259209 |
| H             | 2.771072  | -2.508538 | -0.811985 | H             | -4.515557 | 1.760568  | 0.128448  |
| H             | 4.287222  | -1.593601 | -0.839848 | H             | -3.046164 | 2.738062  | 0.188323  |
| H             | 3.65121   | -2.240492 | 0.680841  | H             | -4.27008  | -0.855092 | -0.039959 |
| <b>tsi6p4</b> |           |           |           | <b>tsi8p3</b> |           |           |           |
| C             | -0.295511 | -0.809522 | 0.088204  | C             | -0.352530 | 0.316090  | 0.077269  |
| C             | 0.835921  | -1.220330 | 0.249149  | C             | -0.870899 | 1.570588  | 0.378698  |
| C             | 2.183798  | -1.663615 | 0.091666  | C             | -1.251593 | -0.737853 | -0.153914 |
| C             | 3.287719  | -0.922356 | -0.069491 | C             | -2.638983 | -0.520523 | -0.190898 |
| C             | 3.461158  | 0.530356  | -0.105807 | C             | -3.117332 | 0.742981  | 0.105966  |
| C             | 4.691831  | 1.009990  | -0.299386 | C             | -2.239540 | 1.779095  | 0.401060  |
| H             | 2.304001  | -2.739997 | 0.111995  | H             | -0.199159 | 2.386055  | 0.610281  |
| H             | 4.884518  | 2.073964  | -0.332661 | H             | -0.864549 | -1.683519 | -0.512716 |
| H             | 5.540968  | 0.351613  | -0.429841 | H             | -2.628139 | 2.759259  | 0.642380  |
| H             | 0.675096  | -1.880637 | 2.055237  | H             | -1.239811 | -1.606159 | 1.556695  |
| C             | -1.622435 | -0.313801 | 0.022481  | C             | 1.107023  | 0.084751  | 0.023046  |
| C             | -1.873812 | 1.047144  | 0.227003  | C             | 1.663074  | -1.101172 | 0.500706  |
| C             | -2.693302 | -1.171864 | -0.246802 | C             | 1.961281  | 1.049169  | -0.510762 |
| C             | -3.166434 | 1.533424  | 0.163087  | C             | 3.030614  | -1.314233 | 0.449066  |

|                 |           |           |           |                 |           |           |           |
|-----------------|-----------|-----------|-----------|-----------------|-----------|-----------|-----------|
| H               | -1.046791 | 1.710948  | 0.437303  | H               | 1.019527  | -1.851345 | 0.941459  |
| C               | -3.982691 | -0.676339 | -0.30818  | C               | 3.328192  | 0.83562   | -0.564215 |
| H               | -2.500215 | -2.223594 | -0.404294 | H               | 1.54705   | 1.965629  | -0.909852 |
| C               | -4.223516 | 0.67504   | -0.104405 | C               | 3.868819  | -0.347347 | -0.08382  |
| H               | -3.351073 | 2.586721  | 0.323745  | H               | 3.443286  | -2.237166 | 0.83368   |
| H               | -4.804769 | -1.347518 | -0.515577 | H               | 3.972703  | 1.592852  | -0.98994  |
| H               | -5.233361 | 1.058512  | -0.153421 | H               | 4.936454  | -0.514544 | -0.125179 |
| C               | 2.291069  | 1.45339   | 0.078453  | H               | -4.184319 | 0.925261  | 0.104444  |
| H               | 1.550423  | 1.308395  | -0.708125 | C               | -3.558954 | -1.6632   | -0.501543 |
| H               | 1.788425  | 1.262103  | 1.026839  | H               | -3.289898 | -2.140466 | -1.444728 |
| H               | 2.620287  | 2.490804  | 0.060695  | H               | -3.493581 | -2.424833 | 0.278741  |
| H               | 4.20972   | -1.480424 | -0.187732 | H               | -4.594604 | -1.334821 | -0.569223 |
| <b>tsi23i24</b> |           |           |           | <b>tsi24p11</b> |           |           |           |
| C               | -2.843295 | 1.017790  | -0.630135 | C               | -2.653308 | 1.206329  | 0.398637  |
| H               | -0.912325 | 2.061170  | -0.681962 | H               | -0.556294 | 1.754958  | 0.583734  |
| C               | -1.621876 | 1.640381  | 0.031819  | C               | -1.312426 | 1.016782  | 0.381166  |
| C               | -3.127342 | -0.225176 | -0.205951 | C               | -3.331755 | -0.021809 | -0.010685 |
| C               | -0.007535 | -0.349181 | 0.680493  | C               | 0.093735  | -0.987205 | -0.323062 |
| H               | -1.918137 | 2.441015  | 0.716869  | H               | -0.955151 | 0.513886  | 2.411295  |
| C               | -2.161718 | -0.608908 | 0.844440  | C               | -2.389981 | -0.945272 | -0.293344 |
| C               | -1.091543 | 0.413277  | 0.704667  | C               | -1.067632 | -0.353262 | -0.102649 |
| C               | 1.387563  | -0.234911 | 0.308812  | C               | 1.449640  | -0.449311 | -0.192588 |
| C               | 2.143734  | -1.370938 | 0.022218  | C               | 2.461714  | -1.278783 | 0.294093  |
| C               | 1.998696  | 1.020162  | 0.216083  | C               | 1.780582  | 0.854737  | -0.563405 |
| C               | 3.467105  | -1.256999 | -0.368313 | C               | 3.752993  | -0.807458 | 0.449967  |
| H               | 1.679001  | -2.344096 | 0.106743  | H               | 2.223945  | -2.299163 | 0.566734  |
| C               | 3.322525  | 1.129326  | -0.17072  | C               | 3.074947  | 1.323309  | -0.41562  |
| H               | 1.431436  | 1.907992  | 0.462348  | H               | 1.025133  | 1.491137  | -1.001764 |
| C               | 4.060821  | -0.007784 | -0.467547 | C               | 4.063067  | 0.498123  | 0.099169  |
| H               | 4.0391    | -2.147399 | -0.591923 | H               | 4.520493  | -1.461083 | 0.841515  |
| H               | 3.782757  | 2.106142  | -0.236955 | H               | 3.31536   | 2.334653  | -0.71418  |
| H               | 5.096136  | 0.080048  | -0.767296 | H               | 5.073406  | 0.866279  | 0.213585  |
| H               | -3.442953 | 1.56476   | -1.346222 | H               | -3.160611 | 2.11206   | 0.696962  |
| C               | -4.273024 | -1.077009 | -0.637701 | C               | -4.813346 | -0.173137 | -0.073604 |
| H               | -4.908423 | -0.560593 | -1.355868 | H               | -5.251319 | 0.552181  | -0.762442 |
| H               | -3.913559 | -1.999422 | -1.09721  | H               | -5.095891 | -1.171059 | -0.404614 |
| H               | -4.885092 | -1.365577 | 0.219366  | H               | -5.26463  | 0.00248   | 0.905154  |
| H               | -1.03239  | -1.415552 | 0.770879  | H               | 0.034883  | -2.035061 | -0.601996 |
| H               | -2.540227 | -0.868658 | 1.832249  | H               | -2.5587   | -1.959523 | -0.622432 |

| <b>tsi9i11</b> |           |           |           | <b>tsi9i10</b> |           |           |           |
|----------------|-----------|-----------|-----------|----------------|-----------|-----------|-----------|
| C              | 0.090337  | 0.285004  | -0.500691 | C              | 0.527578  | -0.479603 | -0.075207 |
| C              | 1.097691  | 0.839465  | -0.952633 | C              | -0.668020 | -0.737475 | 0.076671  |
| C              | 2.558261  | 0.718467  | -1.043085 | C              | -2.076643 | -1.001126 | 0.057986  |
| C              | 3.096342  | -0.062438 | 0.145715  | C              | -3.091067 | -0.047794 | -0.020962 |
| C              | 2.355375  | -1.017031 | 0.735050  | C              | -4.449766 | -0.497287 | 0.030693  |
| C              | 1.100463  | -1.516181 | 0.237351  | C              | -5.541395 | 0.283612  | -0.032754 |
| H              | 3.034252  | 1.700169  | -1.072771 | H              | -2.341700 | -2.052042 | 0.059754  |
| H              | 2.821223  | 0.226474  | -1.986118 | H              | -4.594414 | -1.569875 | 0.121424  |
| H              | 2.694396  | -1.401591 | 1.692876  | H              | -5.474391 | 1.359521  | -0.123139 |
| H              | 1.046171  | -1.895953 | -0.773892 | H              | -6.532496 | -0.144920 | 0.002781  |
| H              | 0.434367  | -2.005547 | 0.937393  | H              | -1.252475 | -0.923305 | 1.226014  |
| C              | -1.320546 | 0.183175  | -0.21648  | C              | 1.903926  | -0.194693 | -0.038523 |
| C              | -2.047765 | -0.95595  | -0.56049  | C              | 2.357235  | 1.130952  | 0.062145  |
| C              | -1.979291 | 1.240796  | 0.41136   | C              | 2.854402  | -1.225954 | -0.113471 |
| C              | -3.40227  | -1.032451 | -0.28773  | C              | 3.710314  | 1.406488  | 0.090572  |
| H              | -1.544718 | -1.780351 | -1.04675  | H              | 1.634538  | 1.933198  | 0.117157  |
| C              | -3.334628 | 1.160031  | 0.68161   | C              | 4.204202  | -0.935189 | -0.080616 |
| H              | -1.416317 | 2.12317   | 0.68122   | H              | 2.516884  | -2.249553 | -0.196885 |
| C              | -4.05047  | 0.024388  | 0.33431   | C              | 4.641757  | 0.378923  | 0.020689  |
| H              | -3.954696 | -1.920565 | -0.56312  | H              | 4.04255   | 2.432883  | 0.168938  |
| H              | -3.83334  | 1.987778  | 1.16738   | H              | 4.923263  | -1.741322 | -0.136628 |
| H              | -5.108797 | -0.037419 | 0.547709  | H              | 5.699615  | 0.60037   | 0.043565  |
| C              | 4.421475  | 0.381359  | 0.679465  | C              | -2.785314 | 1.412401  | -0.118253 |
| H              | 5.200513  | 0.287051  | -0.082183 | H              | -3.177896 | 1.954151  | 0.746441  |
| H              | 4.394245  | 1.43442   | 0.972556  | H              | -1.714407 | 1.594072  | -0.178461 |
| <b>tsi9i23</b> |           |           |           | <b>tsi9p6</b>  |           |           |           |
| C              | -3.434919 | 0.068279  | -0.060457 | C              | 0.419281  | -0.570985 | -0.001054 |
| H              | -2.55023  | -1.471953 | -1.271673 | C              | -0.749081 | -0.858857 | 0.004139  |
| C              | -2.367271 | -0.425503 | -1.003389 | C              | -2.120124 | -1.228470 | -0.000959 |
| C              | -3.105951 | 0.150664  | 1.227504  | C              | -3.159923 | -0.351070 | -0.050888 |
| C              | 0.201059  | -0.191618 | -0.449501 | C              | -2.930423 | 1.081214  | 0.011476  |
| H              | -2.401456 | 0.13671   | -1.940564 | C              | -3.885356 | 2.011071  | -0.004857 |
| C              | -1.80527  | -0.322526 | 1.680462  | H              | -2.322945 | -2.283738 | -0.136210 |
| H              | -3.797745 | 0.59348   | 1.939847  | H              | -1.894299 | 1.391689  | 0.075149  |
| C              | -1.014417 | -0.304788 | -0.419385 | H              | -3.636725 | 3.061918  | 0.042832  |
| C              | 1.597898  | -0.053876 | -0.259381 | H              | -4.936437 | 1.761287  | -0.066203 |
| C              | 2.420712  | -1.182827 | -0.157125 | H              | -2.293998 | -1.788031 | 1.966333  |
| C              | 2.18257   | 1.215878  | -0.168946 | C              | 1.801952  | -0.222249 | -0.006223 |

|                 |           |           |           |                 |           |           |           |
|-----------------|-----------|-----------|-----------|-----------------|-----------|-----------|-----------|
| C               | 3.782918  | -1.041496 | 0.031909  | C               | 2.782656  | -1.215453 | -0.056185 |
| H               | 1.976211  | -2.165801 | -0.227442 | C               | 2.193591  | 1.117656  | 0.039102  |
| C               | 3.545606  | 1.347073  | 0.021143  | C               | 4.122846  | -0.872525 | -0.06096  |
| H               | 1.552795  | 2.091007  | -0.247955 | H               | 2.481747  | -2.253086 | -0.090377 |
| C               | 4.351547  | 0.221487  | 0.122020  | C               | 3.5357    | 1.453001  | 0.034247  |
| H               | 4.405998  | -1.922183 | 0.109990  | H               | 1.436571  | 1.888383  | 0.078452  |
| H               | 3.983055  | 2.333815  | 0.091124  | C               | 4.503625  | 0.460638  | -0.015899 |
| H               | 5.417413  | 0.328025  | 0.269686  | H               | 4.873962  | -1.649565 | -0.099777 |
| C               | -4.759276 | 0.444734  | -0.637741 | H               | 3.827698  | 2.493645  | 0.069908  |
| H               | -5.229902 | -0.411785 | -1.127834 | H               | 5.55203   | 0.725523  | -0.019569 |
| H               | -5.438775 | 0.808021  | 0.131629  | C               | -4.56332  | -0.865709 | -0.124684 |
| H               | -4.64854  | 1.221658  | -1.398457 | H               | -5.1359   | -0.549427 | 0.749889  |
| H               | -1.211094 | 0.293402  | 2.344079  | H               | -5.076652 | -0.475633 | -1.005514 |
| <b>tsi11i12</b> |           |           |           | <b>tsi10i12</b> |           |           |           |
| C               | -0.231099 | -0.057262 | 0.542292  | C               | 0.071525  | -0.394015 | 0.146054  |
| C               | -0.941766 | -1.22764  | 0.526077  | C               | 1.012273  | -1.225456 | 0.552013  |
| C               | -1.041646 | 1.173622  | 0.889045  | C               | 2.444387  | -1.133064 | 0.321435  |
| C               | -2.3566   | 1.155832  | 0.146572  | C               | 3.142327  | -0.018652 | -0.000865 |
| C               | -2.971054 | 0.025539  | -0.207303 | C               | 2.457244  | 1.216868  | -0.294516 |
| C               | -2.305678 | -1.235029 | 0.174119  | C               | 1.303432  | 1.262111  | -0.993139 |
| H               | -0.50126  | 2.090106  | 0.658329  | H               | 0.70840   | -2.038928 | 1.212395  |
| H               | -1.233112 | 1.222156  | 1.968897  | H               | 3.011148  | -2.014492 | 0.598850  |
| H               | -2.814599 | 2.111693  | -0.082643 | H               | 2.857787  | 2.125322  | 0.145636  |
| H               | -2.917468 | -2.103426 | 0.401413  | H               | 0.745447  | 2.183429  | -1.096437 |
| H               | -1.42193  | -1.811913 | -0.584827 | H               | 1.039831  | 0.468111  | -1.676041 |
| C               | -4.277061 | -0.035564 | -0.938416 | C               | -1.327491 | -0.199638 | 0.115329  |
| H               | -5.012071 | -0.614754 | -0.374979 | C               | -2.166722 | -1.120603 | -0.539602 |
| H               | -4.68584  | 0.959347  | -1.107391 | C               | -1.913631 | 0.94463   | 0.686986  |
| H               | -4.159216 | -0.525202 | -1.907375 | C               | -3.53101  | -0.910699 | -0.597787 |
| C               | 1.190079  | -0.008296 | 0.217181  | H               | -1.726416 | -1.996911 | -0.995381 |
| C               | 1.937334  | -1.196065 | 0.180531  | C               | -3.278131 | 1.142151  | 0.624098  |
| C               | 1.856824  | 1.183698  | -0.090929 | H               | -1.276646 | 1.665115  | 1.181809  |
| C               | 3.275253  | -1.190109 | -0.160113 | C               | -4.095056 | 0.2182    | -0.017649 |
| H               | 1.444251  | -2.121071 | 0.445182  | H               | -4.16145  | -1.632333 | -1.099933 |
| C               | 3.198438  | 1.186215  | -0.433118 | H               | -3.712328 | 2.02346   | 1.076849  |
| H               | 1.324851  | 2.1242    | -0.084864 | H               | -5.163012 | 0.379362  | -0.067796 |
| C               | 3.916782  | 0.00182   | -0.471127 | C               | 4.643204  | 0.009786  | 0.072279  |
| H               | 3.826883  | -2.120771 | -0.173664 | H               | 4.97671   | 0.799253  | 0.75024   |
| H               | 3.684875  | 2.122259  | -0.673307 | H               | 5.04769   | -0.936798 | 0.426992  |

| <b>tsi10p6</b>  |           |           |           | <b>tsi12p5</b>   |           |           |           |
|-----------------|-----------|-----------|-----------|------------------|-----------|-----------|-----------|
| C               | -0.361840 | -0.618597 | -0.138733 | C                | 0.254551  | -0.013242 | 0.017435  |
| C               | 0.781583  | -0.994217 | -0.304445 | C                | 0.975994  | -1.12627  | 0.436058  |
| C               | 2.178707  | -1.266425 | -0.209595 | C                | 0.980535  | 1.127731  | -0.367320 |
| C               | 3.132264  | -0.341060 | -0.004948 | C                | 2.379197  | 1.085015  | -0.443611 |
| C               | 2.801261  | 1.075273  | 0.133024  | C                | 3.085724  | -0.02915  | -0.033472 |
| C               | 3.681989  | 2.048391  | 0.347071  | C                | 2.359614  | -1.13128  | 0.422737  |
| H               | 2.465495  | -2.304226 | -0.321703 | H                | 0.44652   | -2.001038 | 0.789840  |
| H               | 1.750461  | 1.325310  | 0.052201  | H                | 0.455645  | 1.955847  | -0.824204 |
| H               | 3.360652  | 3.076539  | 0.438310  | H                | 2.909935  | 1.954909  | -0.808489 |
| H               | 4.743692  | 1.860354  | 0.439177  | H                | 2.890093  | -2.01295  | 0.760804  |
| H               | 0.510410  | -2.047809 | -1.913939 | H                | 0.838623  | 2.132237  | 1.213733  |
| C               | -1.728055 | -0.243879 | -0.051282 | C                | -1.223012 | -0.01593  | 0.001433  |
| C               | -2.685799 | -1.158681 | 0.397524  | C                | -1.946773 | 1.126672  | 0.340766  |
| C               | -2.134138 | 1.044375  | -0.413648 | C                | -1.929507 | -1.163464 | -0.358702 |
| C               | -4.015945 | -0.789668 | 0.479374  | C                | -3.33166  | 1.120274  | 0.324165  |
| H               | -2.373259 | -2.154808 | 0.677241  | H                | -1.418713 | 2.020207  | 0.647099  |
| C               | -3.46614  | 1.404944  | -0.326819 | C                | -3.313842 | -1.169823 | -0.376168 |
| H               | -1.396096 | 1.751823  | -0.765052 | H                | -1.387795 | -2.052993 | -0.652037 |
| C               | -4.410222 | 0.491006  | 0.119226  | C                | -4.021307 | -0.027438 | -0.034196 |
| H               | -4.749239 | -1.504782 | 0.82615   | H                | -3.874041 | 2.014657  | 0.599774  |
| H               | -3.77007  | 2.403312  | -0.610111 | H                | -3.841914 | -2.068141 | -0.666368 |
| H               | -5.451176 | 0.776125  | 0.185268  | H                | -5.102638 | -0.031677 | -0.048085 |
| C               | 4.570924  | -0.754543 | 0.084372  | C                | 4.587772  | -0.063805 | -0.064299 |
| H               | 5.164608  | -0.26132  | -0.687618 | H                | 4.995813  | -0.058947 | 0.947988  |
| H               | 4.996884  | -0.471788 | 1.048878  | H                | 4.950965  | -0.965934 | -0.55758  |
| <b>tsi23i25</b> |           |           |           | <b>tsi25p11'</b> |           |           |           |
| C               | -3.017896 | -0.724104 | -0.774228 | C                | -2.929912 | 0.54246   | 0.115327  |
| C               | -1.935258 | -1.627925 | -0.363934 | H                | -0.958837 | 1.437447  | 0.294787  |
| C               | -3.033014 | 0.379103  | -0.003988 | C                | -1.572436 | 0.564054  | 0.154466  |
| C               | 0.113469  | -0.988580 | 0.037053  | C                | -3.362741 | -0.825966 | -0.165954 |
| H               | -2.172912 | -2.640001 | -0.043401 | C                | 0.169334  | -1.253456 | -0.255492 |
| C               | -1.915888 | 0.377288  | 1.039926  | H                | -1.341218 | 0.406595  | 2.278432  |
| C               | -1.101328 | -0.754361 | 0.500789  | C                | -2.28273  | -1.613768 | -0.308741 |
| C               | 1.420664  | -0.380191 | 0.000422  | C                | -1.083757 | -0.786861 | -0.149554 |
| C               | 2.574381  | -1.143758 | 0.205698  | C                | 1.421683  | -0.50175  | -0.151319 |
| C               | 1.563491  | 0.983059  | -0.287706 | C                | 2.528414  | -1.112451 | 0.441283  |
| C               | 3.825849  | -0.557717 | 0.152688  | C                | 1.56471   | 0.79478   | -0.647476 |
| H               | 2.472851  | -2.200636 | 0.41231   | C                | 3.726659  | -0.434228 | 0.576254  |



|           |           |           |           |           |           |           |           |
|-----------|-----------|-----------|-----------|-----------|-----------|-----------|-----------|
| C         | 2.817768  | 1.563808  | -0.344767 | H         | 2.437848  | -2.125326 | 0.812741  |
| H         | 0.678918  | 1.57744   | -0.473983 | C         | 2.766812  | 1.46957   | -0.521020 |
| C         | 3.95302   | 0.797253  | -0.121913 | H         | 0.738492  | 1.260919  | -1.164813 |
| H         | 4.708323  | -1.159807 | 0.322498  | C         | 3.848411  | 0.86209   | 0.098482  |
| H         | 2.911672  | 2.618493  | -0.566533 | H         | 4.568883  | -0.919216 | 1.050590  |
| H         | 4.93298   | 1.252305  | -0.168093 | H         | 2.862513  | 2.471293  | -0.917453 |
| C         | -4.027041 | 1.487725  | -0.045855 | H         | 4.786225  | 1.391534  | 0.196502  |
| H         | -4.535925 | 1.588501  | 0.916096  | C         | -3.858625 | 1.678021  | 0.365181  |
| H         | -3.536271 | 2.443759  | -0.244037 | H         | -3.315202 | 2.605921  | 0.534238  |
| H         | -4.778573 | 1.321795  | -0.816134 | H         | -4.536174 | 1.823103  | -0.478741 |
| H         | -1.368338 | 1.319077  | 1.085405  | H         | -4.478683 | 1.481638  | 1.243024  |
| H         | -2.33917  | 0.193777  | 2.03312   | H         | 0.281862  | -2.322933 | -0.406318 |
| H         | -0.649612 | -1.848983 | -0.884115 | H         | -2.264951 | -2.671892 | -0.518562 |
| H         | -3.753254 | -0.935312 | -1.538259 | H         | -4.395726 | -1.134056 | -0.233044 |
| <b>p3</b> |           |           |           | <b>p4</b> |           |           |           |
| C         | -1.259030 | -0.745618 | 0.179981  | C         | 2.618202  | 0.758555  | 0.000000  |
| C         | -2.635084 | -0.562640 | 0.142409  | C         | 3.438737  | -0.302512 | 0.000000  |
| C         | -3.127539 | 0.702737  | -0.159775 | C         | 3.129004  | -1.732083 | 0.000000  |
| C         | -0.371907 | 0.298849  | -0.070612 | C         | 1.200767  | 0.776025  | 0.000000  |
| C         | 1.091942  | 0.073082  | -0.025801 | C         | -1.425026 | 0.896815  | 0.000000  |
| C         | -0.890847 | 1.556369  | -0.366635 | C         | 4.146303  | -2.596749 | 0.000000  |
| H         | -0.219492 | 2.375199  | -0.588380 | C         | 0.00000   | 0.860294  | 0.000000  |
| C         | -2.260811 | 1.753081  | -0.411205 | H         | 3.079226  | 1.739751  | 0.000000  |
| H         | -0.864262 | -1.723098 | 0.430067  | H         | 3.979142  | -3.665554 | 0.000000  |
| H         | -2.655339 | 2.730617  | -0.654327 | H         | 5.174707  | -2.259127 | 0.000000  |
| C         | 1.939825  | 1.008019  | 0.565079  | C         | -2.109057 | 2.114338  | 0.000000  |
| C         | 1.654669  | -1.078209 | -0.573486 | C         | -2.156144 | -0.293709 | 0.000000  |
| C         | 3.308292  | 0.798509  | 0.607707  | C         | -3.492313 | 2.13683   | 0.000000  |
| H         | 1.518852  | 1.898061  | 1.014021  | H         | -1.545227 | 3.036595  | 0.000000  |
| C         | 3.022971  | -1.28895  | -0.531685 | C         | -3.539162 | -0.263464 | 0.000000  |
| H         | 1.014376  | -1.805027 | -1.055909 | H         | -1.627891 | -1.237105 | 0.000000  |
| C         | 3.855523  | -0.351189 | 0.059417  | C         | -4.211021 | 0.950225  | 0.000000  |
| H         | 3.94869   | 1.532809  | 1.077623  | H         | -4.012413 | 3.084985  | 0.000000  |
| H         | 3.440968  | -2.185546 | -0.969313 | H         | -4.0954   | -1.190891 | 0.000000  |
| H         | 4.923939  | -0.515233 | 0.092365  | H         | -5.292177 | 0.97135   | 0.000000  |
| C         | -3.571152 | -1.69729  | 0.455459  | C         | 1.705144  | -2.208838 | 0.000000  |
| H         | -3.877804 | -1.667688 | 1.502906  | H         | 1.16977   | -1.840043 | 0.875143  |
| H         | -4.474535 | -1.642652 | -0.151514 | H         | 1.16977   | -1.840043 | -0.875143 |
| H         | -3.098982 | -2.662563 | 0.277425  | H         | 1.668585  | -3.296788 | 0.000000  |

|            |           |           |           |             |           |           |           |
|------------|-----------|-----------|-----------|-------------|-----------|-----------|-----------|
| H          | -4.197523 | 0.864611  | -0.200103 | H           | 4.499297  | -0.077488 | 0.000000  |
| <b>p11</b> |           |           |           | <b>p5</b>   |           |           |           |
| C          | 2.653153  | 1.202643  | 0.467688  | C           | 0.988166  | -1.115058 | -0.423034 |
| C          | 1.323819  | 1.021372  | 0.407514  | C           | 2.372328  | -1.111551 | -0.426529 |
| C          | 3.342836  | -0.019501 | 0.023358  | C           | 3.090559  | 0.003398  | -0.008798 |
| C          | -0.080252 | -0.980701 | -0.290379 | C           | 0.269562  | 0.001132  | -0.002044 |
| C          | 2.405931  | -0.934229 | -0.284440 | C           | -1.211499 | 0.000261  | -0.000124 |
| C          | 1.081091  | -0.342142 | -0.080578 | C           | 0.988377  | 1.119398  | 0.413019  |
| C          | -1.43767  | -0.443559 | -0.165269 | H           | 0.45726   | 1.995605  | 0.761630  |
| C          | -2.456509 | -1.278533 | 0.297526  | C           | 2.372514  | 1.118686  | 0.408374  |
| C          | -1.763469 | 0.866026  | -0.521898 | H           | 0.456732  | -1.989365 | -0.775901 |
| C          | -3.749573 | -0.808642 | 0.444014  | H           | 2.904796  | -1.989934 | -0.770183 |
| H          | -2.223125 | -2.303273 | 0.557655  | H           | 2.905249  | 2.001297  | 0.740623  |
| C          | -3.05919  | 1.333594  | -0.382509 | C           | -1.927611 | 1.121402  | -0.415739 |
| H          | -1.001216 | 1.507887  | -0.939954 | C           | -1.924326 | -1.122198 | 0.417651  |
| C          | -4.054463 | 0.502111  | 0.108219  | C           | -3.312732 | 1.121181  | -0.413067 |
| H          | -4.522452 | -1.46741  | 0.815991  | H           | -1.39255  | 1.994935  | -0.764634 |
| H          | -3.295235 | 2.349323  | -0.669590 | C           | -3.309427 | -1.124442 | 0.419491  |
| H          | -5.065977 | 0.869409  | 0.215033  | H           | -1.386486 | -1.994843 | 0.764530  |
| H          | 3.160041  | 2.094189  | 0.808176  | C           | -4.009631 | -0.002222 | 0.004369  |
| C          | 4.825056  | -0.158614 | -0.042387 | H           | -3.849444 | 1.999426  | -0.745950 |
| H          | 5.257017  | 0.579099  | -0.722187 | H           | -3.843512 | -2.003669 | 0.754003  |
| H          | 5.27668   | 0.008679  | 0.937946  | H           | -5.091066 | -0.003167 | 0.006107  |
| H          | 5.115379  | -1.150055 | -0.386262 | C           | 4.593546  | -0.006194 | 0.016737  |
| H          | -0.021665 | -2.029811 | -0.564994 | H           | 4.962295  | -0.363178 | 0.980599  |
| H          | 2.573591  | -1.93696  | -0.647702 | H           | 4.998578  | -0.662629 | -0.75271  |
| H          | 0.562422  | 1.719974  | 0.710737  | H           | 4.999193  | 0.99276   | -0.139947 |
| <b>p6</b>  |           |           |           | <b>p11'</b> |           |           |           |
| C          | 0.000000  | 0.702676  | 0.000000  | C           | -3.379205 | -0.820614 | -0.140418 |
| C          | 1.126833  | 0.277940  | 0.000000  | C           | -2.302607 | -1.605528 | -0.295764 |
| C          | 2.466342  | -0.184206 | 0.000000  | C           | -2.937511 | 0.550656  | 0.161057  |
| C          | 2.844873  | -1.475430 | 0.000000  | C           | 0.150106  | -1.246640 | -0.220348 |
| C          | 1.854411  | -2.548737 | 0.000000  | H           | -2.282700 | -2.659418 | -0.525965 |
| C          | 2.134144  | -3.848935 | 0.000000  | C           | -1.590587 | 0.574565  | 0.163614  |
| H          | 3.229684  | 0.585395  | 0.000000  | C           | -1.102972 | -0.774803 | -0.128975 |
| H          | 0.818033  | -2.232240 | 0.000000  | C           | 1.405103  | -0.497187 | -0.124532 |
| H          | 1.343600  | -4.586294 | 0.000000  | C           | 2.518622  | -1.112855 | 0.450234  |
| H          | 3.149402  | -4.223672 | 0.000000  | C           | 1.544444  | 0.802374  | -0.614722 |
| C          | -1.337536 | 1.196622  | 0.000000  | C           | 3.720192  | -0.437942 | 0.573430  |

|                |           |           |           |                |           |           |           |
|----------------|-----------|-----------|-----------|----------------|-----------|-----------|-----------|
| C              | -2.419022 | 0.312486  | 0.00000   | H              | 2.431435  | -2.128259 | 0.81580   |
| C              | -1.585364 | 2.571326  | 0.00000   | C              | 2.749363  | 1.474218  | -0.49916  |
| C              | -3.715595 | 0.794951  | 0.00000   | H              | 0.711337  | 1.273212  | -1.11647  |
| H              | -2.23075  | -0.752047 | 0.00000   | C              | 3.838221  | 0.861125  | 0.10220   |
| C              | -2.88454  | 3.046519  | 0.00000   | H              | 4.567862  | -0.927753 | 1.03299   |
| H              | -0.750375 | 3.25781   | 0.00000   | H              | 2.841767  | 2.478227  | -0.89070  |
| C              | -3.952889 | 2.161636  | 0.00000   | H              | 4.778363  | 1.38817   | 0.19075   |
| H              | -4.54498  | 0.100926  | 0.00000   | C              | -3.871521 | 1.679255  | 0.43307   |
| H              | -3.064304 | 4.112932  | 0.00000   | H              | -4.518577 | 1.452768  | 1.28331   |
| H              | -4.96737  | 2.536025  | 0.00000   | H              | -3.330724 | 2.598891  | 0.65033   |
| C              | 4.299563  | -1.837084 | 0.00000   | H              | -4.52406  | 1.860077  | -0.42397  |
| H              | 4.55136   | -2.434582 | 0.878359  | H              | -0.972558 | 1.426132  | 0.396004  |
| H              | 4.55136   | -2.434582 | -0.878359 | H              | 0.261494  | -2.317935 | -0.359027 |
| H              | 4.927013  | -0.94825  | 0.00000   | H              | -4.413549 | -1.123846 | -0.21119  |
| <b>vdW(i5)</b> |           |           |           | <b>vdW(i9)</b> |           |           |           |
| C              | 2.200010  | 0.708985  | 0.018054  | C              | 1.517587  | -0.15654  | -1.266654 |
| C              | 1.801645  | -0.485680 | 0.769975  | C              | 2.266095  | -0.135002 | -0.005916 |
| C              | 1.116083  | -0.351454 | 1.904470  | C              | 2.653204  | 1.030737  | 0.510776  |
| H              | 3.226062  | -0.200316 | -1.592393 | H              | 1.17033   | -2.233931 | -1.449849 |
| H              | 1.885850  | 1.657176  | 0.442389  | H              | 1.347868  | 0.813559  | -1.722435 |
| C              | -1.071792 | 2.227346  | -0.006097 | C              | -0.80275  | 2.264503  | 0.083946  |
| H              | 0.804094  | -1.210526 | 2.483782  | H              | 3.202598  | 1.08112   | 1.441975  |
| H              | 0.847919  | 0.626375  | 2.284120  | H              | 2.422368  | 1.969497  | 0.023609  |
| H              | 3.135975  | 1.641538  | -1.613550 | H              | 0.486379  | -1.170443 | -2.790589 |
| C              | 2.886479  | 0.712690  | -1.119989 | C              | 1.035422  | -1.242284 | -1.862084 |
| C              | -1.374324 | 0.880693  | -0.188312 | C              | -1.266771 | 0.958673  | 0.220353  |
| C              | -2.144583 | 0.184577  | 0.767759  | C              | -0.840978 | 0.159688  | 1.302884  |
| C              | -0.875613 | 0.182963  | -1.308848 | C              | -2.137279 | 0.404625  | -0.742144 |
| C              | -2.394711 | -1.159565 | 0.609377  | C              | -1.265234 | -1.145653 | 1.406284  |
| H              | -2.518668 | 0.726384  | 1.624464  | H              | -0.16405  | 0.588798  | 2.026669  |
| C              | -0.658708 | 3.403423  | 0.236181  | C              | -0.256874 | 3.393266  | -0.117464 |
| C              | -1.13223  | -1.16131  | -1.455355 | C              | -2.55598  | -0.901337 | -0.626455 |
| H              | -0.27408  | 0.720322  | -2.026839 | H              | -2.454985 | 1.023204  | -1.569119 |
| C              | -1.88634  | -1.833002 | -0.497712 | C              | -2.117748 | -1.67713  | 0.442669  |
| H              | -2.979215 | -1.69317  | 1.345322  | H              | -0.934017 | -1.759094 | 2.232252  |
| H              | -0.743048 | -1.69684  | -2.309762 | H              | -3.218363 | -1.326504 | -1.367027 |
| H              | -2.079438 | -2.890808 | -0.614929 | H              | -2.443892 | -2.705067 | 0.526031  |
| C              | 2.177572  | -1.833082 | 0.226842  | C              | 2.555899  | -1.441394 | 0.673031  |
| H              | 1.763808  | -1.977315 | -0.773321 | H              | 1.627903  | -1.965455 | 0.914108  |

|                |           |           |           |                |           |           |           |
|----------------|-----------|-----------|-----------|----------------|-----------|-----------|-----------|
| H              | 3.261606  | -1.931819 | 0.143944  | H              | 3.136437  | -2.099963 | 0.024265  |
| H              | 1.808221  | -2.630507 | 0.868704  | H              | 3.113868  | -1.288637 | 1.594758  |
| <b>tsi5vdW</b> |           |           |           | <b>tsi9vdW</b> |           |           |           |
| C              | 2.206005  | 0.286190  | 0.497440  | C              | -1.423413 | -0.723452 | 1.241370  |
| C              | 1.640332  | -1.065065 | 0.548697  | C              | -2.223309 | -0.356845 | 0.069611  |
| C              | 0.906410  | -1.434393 | 1.597915  | C              | -2.771738 | 0.855844  | -0.000358 |
| H              | 1.990108  | 0.917584  | 1.353083  | H              | -0.825087 | -2.672660 | 0.683182  |
| C              | -0.380418 | 2.318403  | -0.047174 | H              | -1.348583 | 0.039420  | 2.009508  |
| H              | 0.464331  | -2.419790 | 1.663745  | C              | 0.307977  | 2.275051  | -0.040508 |
| H              | 0.728384  | -0.756818 | 2.423082  | H              | -3.353294 | 1.167928  | -0.857446 |
| H              | 3.272165  | 1.812322  | -0.470803 | H              | -2.645542 | 1.580821  | 0.793433  |
| C              | 2.919377  | 0.791404  | -0.503336 | H              | -0.211930 | -2.066133 | 2.311668  |
| C              | -1.071419 | 1.112640  | -0.150870 | C              | -0.790272 | -1.878634 | 1.417773  |
| C              | -1.884490 | 0.658467  | 0.907965  | C              | 1.046161  | 1.099477  | -0.160888 |
| C              | -0.942496 | 0.314815  | -1.306541 | C              | 0.916749  | 0.292163  | -1.310204 |
| C              | -2.544631 | -0.546352 | 0.807438  | C              | 1.912643  | 0.687453  | 0.872568  |
| H              | -1.973592 | 1.272842  | 1.792374  | C              | 1.625424  | -0.883494 | -1.412882 |
| C              | 0.311809  | 3.378751  | 0.065719  | H              | 0.241467  | 0.61085   | -2.091047 |
| C              | -1.600916 | -0.890964 | -1.392417 | C              | -0.396919 | 3.326753  | 0.076196  |
| H              | -0.307079 | 0.665899  | -2.106766 | C              | 2.623911  | -0.485972 | 0.754002  |
| C              | -2.401602 | -1.321365 | -0.338612 | H              | 2.001863  | 1.309362  | 1.751667  |
| H              | -3.167276 | -0.892536 | 1.620164  | C              | 2.478628  | -1.272179 | -0.38397  |
| H              | -1.494397 | -1.505007 | -2.275525 | H              | 1.520475  | -1.504726 | -2.291248 |
| H              | -2.916333 | -2.269902 | -0.410794 | H              | 3.28837   | -0.79955  | 1.546604  |
| C              | 1.89772   | -1.994025 | -0.60148  | H              | 3.033507  | -2.196611 | -0.469979 |
| H              | 1.53064   | -1.56643  | -1.536626 | C              | -2.380997 | -1.364977 | -1.030614 |
| H              | 2.967613  | -2.170075 | -0.727244 | H              | -1.407696 | -1.653624 | -1.434612 |
| H              | 1.406656  | -2.952974 | -0.447618 | H              | -2.856772 | -2.275689 | -0.661682 |
| H              | 3.164692  | 0.213849  | -1.385537 | H              | -2.985844 | -0.966522 | -1.842617 |
| <b>i30</b>     |           |           |           | <b>i31</b>     |           |           |           |
| C              | -2.437033 | 0.631258  | -0.576385 | C              | 2.437471  | -0.877219 | 0.186241  |
| H              | -3.917511 | 2.245368  | -0.175380 | H              | 2.557154  | -0.839768 | -2.059574 |
| C              | -2.892170 | 1.943125  | -0.018981 | C              | 2.217779  | -1.427349 | -1.216430 |
| C              | -3.206660 | -0.528742 | 0.063588  | C              | 3.122832  | 0.413698  | 0.444667  |
| C              | 0.191282  | 0.288799  | -0.307763 | C              | -0.155835 | -0.61018  | -0.346548 |
| C              | -4.068285 | -1.236768 | -0.652289 | H              | 2.297924  | -2.498821 | -1.344542 |
| H              | -4.232243 | -1.038732 | -1.703911 | C              | 3.78841   | 0.595546  | 1.580396  |
| C              | -0.990998 | 0.448199  | -0.437949 | H              | 4.283131  | 1.532597  | 1.798818  |
| C              | 1.599768  | 0.093208  | -0.157252 | H              | 3.858027  | -0.184877 | 2.327105  |

|            |           |           |           |            |           |           |           |
|------------|-----------|-----------|-----------|------------|-----------|-----------|-----------|
| C          | 2.155090  | -1.179318 | -0.300751 | C          | 1.075894  | -0.906739 | -0.444944 |
| C          | 2.437411  | 1.170168  | 0.136763  | C          | -1.463731 | -0.241267 | -0.135270 |
| C          | 3.518119  | -1.367214 | -0.152341 | C          | -1.927635 | 1.047969  | -0.505880 |
| H          | 1.507927  | -2.01444  | -0.529639 | C          | -2.394495 | -1.139677 | 0.448580  |
| C          | 3.799642  | 0.975681  | 0.283635  | C          | -3.240327 | 1.405323  | -0.297833 |
| H          | 2.009489  | 2.156685  | 0.247637  | H          | -1.232288 | 1.744687  | -0.952925 |
| C          | 4.34395   | -0.291943 | 0.139984  | C          | -3.702395 | -0.759799 | 0.646898  |
| H          | 3.937517  | -2.357573 | -0.265915 | H          | -2.058193 | -2.126041 | 0.735763  |
| H          | 4.43921   | 1.817554  | 0.511202  | C          | -4.139135 | 0.510412  | 0.277913  |
| H          | 5.408756  | -0.441328 | 0.255273  | H          | -3.57437  | 2.393305  | -0.585336 |
| H          | -2.675432 | 0.609963  | -1.646056 | H          | -4.396598 | -1.458104 | 1.094976  |
| C          | -2.946415 | -0.776727 | 1.518073  | H          | -5.168339 | 0.799625  | 0.437253  |
| H          | -1.894757 | -1.017975 | 1.682847  | H          | 2.592118  | -1.628834 | 0.951209  |
| H          | -3.16449  | 0.117286  | 2.106076  | C          | 3.023075  | 1.486275  | -0.600283 |
| H          | -3.556201 | -1.596149 | 1.893346  | H          | 3.544029  | 1.193491  | -1.514226 |
| H          | -2.246329 | 2.543621  | 0.602625  | H          | 1.981942  | 1.675469  | -0.867755 |
| H          | -4.638147 | -2.042636 | -0.208098 | H          | 3.46403   | 2.415306  | -0.24581  |
| <b>i32</b> |           |           |           | <b>i33</b> |           |           |           |
| C          | 3.303910  | 0.905618  | -0.377924 | C          | 2.508974  | -0.286573 | -0.120691 |
| C          | 2.712630  | 1.973408  | -0.883905 | H          | 2.56463   | -0.092302 | -2.359897 |
| C          | 2.621329  | -0.329719 | 0.178122  | C          | 2.297998  | -0.765471 | -1.554537 |
| C          | -0.042701 | -0.166063 | 0.075098  | C          | 2.996943  | 1.099311  | 0.046312  |
| H          | 1.634300  | 2.047772  | -0.944028 | C          | -0.118053 | -0.285731 | -0.550284 |
| C          | 2.974647  | -0.478029 | 1.633146  | H          | 2.476489  | -1.81431  | -1.755706 |
| H          | 2.929430  | 0.385549  | 2.280645  | C          | 3.73657   | 1.544245  | 1.052226  |
| C          | 1.156873  | -0.229243 | 0.100896  | H          | 2.697612  | 1.790196  | -0.735874 |
| C          | -1.468672 | -0.081653 | 0.037450  | H          | 4.046435  | 2.578862  | 1.096955  |
| C          | -2.233542 | -1.176419 | -0.368776 | H          | 4.057269  | 0.901145  | 1.861198  |
| C          | -2.115928 | 1.099088  | 0.405974  | C          | 1.133076  | -0.41793  | -0.725188 |
| C          | -3.61405  | -1.088993 | -0.404666 | C          | -1.444081 | -0.100974 | -0.232819 |
| H          | -1.734485 | -2.09162  | -0.65496  | C          | -2.085679 | 1.142696  | -0.467895 |
| C          | -3.496768 | 1.180181  | 0.367095  | C          | -2.216029 | -1.151666 | 0.327386  |
| H          | -1.525481 | 1.947452  | 0.722877  | C          | -3.415093 | 1.313462  | -0.154873 |
| C          | -4.249714 | 0.08794   | -0.037733 | H          | -1.51194  | 1.953476  | -0.894457 |
| H          | -4.196538 | -1.943576 | -0.720903 | C          | -3.544069 | -0.957376 | 0.632465  |
| H          | -3.987401 | 2.10003   | 0.654737  | H          | -1.743021 | -2.106168 | 0.511236  |
| H          | -5.328703 | 0.15366   | -0.06701  | C          | -4.156647 | 0.27102   | 0.396045  |
| H          | 4.387227  | 0.856886  | -0.328412 | H          | -3.886029 | 2.269784  | -0.339300 |
| C          | 3.093233  | -1.563357 | -0.614678 | H          | -4.115576 | -1.76995  | 1.060800  |

|                 |           |           |           |                 |           |           |           |
|-----------------|-----------|-----------|-----------|-----------------|-----------|-----------|-----------|
| H               | 2.810209  | -1.472525 | -1.661968 | H               | -5.200231 | 0.414315  | 0.638375  |
| H               | 4.17802   | -1.652707 | -0.548549 | C               | 2.905637  | -1.308029 | 0.914792  |
| H               | 2.643906  | -2.468746 | -0.207582 | H               | 3.991068  | -1.417881 | 0.951561  |
| H               | 3.047214  | -1.463742 | 2.071134  | H               | 2.5572    | -1.010676 | 1.904209  |
| H               | 3.294816  | 2.805014  | -1.25658  | H               | 2.468802  | -2.278391 | 0.683275  |
| <b>tsi30i31</b> |           |           |           | <b>tsi32i33</b> |           |           |           |
| C               | -2.459923 | -0.875291 | -0.072455 | C               | 2.526426  | -0.276398 | -0.203069 |
| C               | -3.362389 | 0.262977  | 0.319119  | H               | 2.168592  | 0.30802   | -2.340099 |
| C               | -4.374385 | 0.042989  | 1.147078  | C               | 2.193369  | -0.515421 | -1.644630 |
| C               | -2.120752 | -1.089213 | -1.513101 | C               | 3.195089  | 1.043324  | 0.052182  |
| H               | -2.158348 | -0.269322 | -2.210851 | C               | -0.141307 | -0.094175 | -0.013322 |
| H               | -1.921996 | -2.085578 | -1.870921 | H               | 2.057218  | -1.524651 | -1.998464 |
| C               | -1.026536 | -0.644193 | -0.054734 | C               | 4.23433   | 1.244668  | 0.844072  |
| H               | -4.570617 | -0.939825 | 1.555884  | H               | 2.756681  | 1.880873  | -0.480378 |
| C               | 1.554862  | -0.147368 | 0.082059  | H               | 4.655399  | 2.233543  | 0.961686  |
| C               | 2.471705  | -1.177345 | 0.346306  | H               | 4.702534  | 0.44457   | 1.401748  |
| C               | 2.048176  | 1.143912  | -0.164409 | C               | 1.072449  | -0.190196 | -0.163457 |
| C               | 0.170444  | -0.401112 | 0.068651  | C               | -1.54604  | -0.006845 | 0.038143  |
| C               | 3.828657  | -0.919401 | 0.35868   | C               | -2.194126 | 1.225355  | -0.140920 |
| H               | 2.101676  | -2.17452  | 0.5395    | C               | -2.327378 | -1.148914 | 0.273889  |
| C               | 3.407523  | 1.388573  | -0.148173 | C               | -3.572212 | 1.304956  | -0.088008 |
| H               | 1.350297  | 1.944272  | -0.367664 | H               | -1.600618 | 2.110847  | -0.320683 |
| C               | 4.305356  | 0.36159   | 0.112478  | C               | -3.704713 | -1.055707 | 0.324793  |
| H               | 4.522122  | -1.724138 | 0.56254   | H               | -1.837178 | -2.102065 | 0.414938  |
| H               | 3.771461  | 2.38883   | -0.340751 | C               | -4.335426 | 0.168309  | 0.144550  |
| H               | 5.3684    | 0.558195  | 0.124299  | H               | -4.056595 | 2.261786  | -0.229039 |
| H               | -5.041223 | 0.841762  | 1.444392  | H               | -4.292758 | -1.945192 | 0.506666  |
| C               | -3.064979 | 1.61462   | -0.255923 | H               | -5.413675 | 0.236023  | 0.185762  |
| H               | -3.743837 | 2.36489   | 0.143723  | C               | 3.113592  | -1.466809 | 0.534481  |
| H               | -2.040025 | 1.913132  | -0.029264 | H               | 4.153673  | -1.610911 | 0.241105  |
| H               | -3.166417 | 1.61168   | -1.343027 | H               | 3.065666  | -1.31537  | 1.612196  |
| H               | -2.738042 | -1.793813 | 0.43868   | H               | 2.556776  | -2.370357 | 0.292341  |
| <b>tsi5i31</b>  |           |           |           | <b>tsi9i33</b>  |           |           |           |
| C               | 2.502558  | -0.802898 | 0.451032  | C               | -2.596544 | -0.272953 | 0.044134  |
| H               | 2.852177  | -1.274116 | -1.682943 | H               | -2.840729 | -0.49174  | 2.233153  |
| C               | 2.387962  | -1.651009 | -0.777296 | C               | -2.478899 | -1.007977 | 1.349106  |
| C               | 2.942162  | 0.574175  | 0.464163  | C               | -2.872082 | 1.1449    | 0.065718  |
| C               | -0.138943 | -0.847128 | -0.454757 | C               | 0.081541  | -0.534107 | 0.749217  |
| H               | 2.545828  | -2.715562 | -0.640016 | H               | -2.74976  | -2.058939 | 1.336074  |

|   |           |           |           |   |           |           |           |
|---|-----------|-----------|-----------|---|-----------|-----------|-----------|
| C | 3.136807  | 1.210783  | 1.628723  | C | -3.20407  | 1.891692  | -0.991935 |
| H | 3.458440  | 2.242603  | 1.658865  | H | -2.786712 | 1.627235  | 1.034746  |
| H | 2.981888  | 0.711498  | 2.576171  | H | -3.389778 | 2.950673  | -0.885309 |
| C | 1.056183  | -1.164255 | -0.503806 | H | -3.305853 | 1.472451  | -1.983990 |
| C | -1.429527 | -0.356096 | -0.222725 | C | -1.133375 | -0.690561 | 0.932288  |
| C | -1.848708 | 0.8599    | -0.794175 | C | 1.387738  | -0.231328 | 0.348965  |
| C | -2.341345 | -1.069138 | 0.577712  | C | 2.006855  | 0.965321  | 0.757491  |
| C | -3.123518 | 1.337287  | -0.566603 | C | 2.118505  | -1.119837 | -0.462754 |
| H | -1.157241 | 1.416295  | -1.411525 | C | 3.297288  | 1.255066  | 0.363289  |
| C | -3.612418 | -0.577924 | 0.796974  | H | 1.455786  | 1.654918  | 1.381469  |
| H | -2.031886 | -2.005936 | 1.019671  | C | 3.407667  | -0.814874 | -0.849342 |
| C | -4.013379 | 0.625089  | 0.22843   | H | 1.655123  | -2.043669 | -0.780016 |
| H | -3.428337 | 2.27501   | -1.011502 | C | 4.006619  | 0.370955  | -0.440914 |
| H | -4.299703 | -1.137442 | 1.417279  | H | 3.756765  | 2.18033   | 0.684184  |
| H | -5.010653 | 1.004091  | 0.403107  | H | 3.953795  | -1.507665 | -1.475470 |
| H | 2.432286  | -1.318345 | 1.398053  | H | 5.0173    | 0.60362   | -0.746035 |
| C | 3.154115  | 1.270647  | -0.851355 | C | -2.751356 | -1.057526 | -1.222098 |
| H | 3.967081  | 0.808686  | -1.415392 | H | -3.800341 | -1.083504 | -1.530813 |
| H | 2.255927  | 1.21799   | -1.47013  | H | -2.175972 | -0.613317 | -2.03498  |
| H | 3.402498  | 2.318629  | -0.699536 | H | -2.408971 | -2.083031 | -1.091996 |

(c)

| Atom                 | X         | Y         | Z         | Atom                  | X         | Y         | Z         |
|----------------------|-----------|-----------|-----------|-----------------------|-----------|-----------|-----------|
| <b>phenylethynyl</b> |           |           |           | <b>1,3-pentadiene</b> |           |           |           |
| C                    | 0.000000  | 0.000000  | 2.063239  | C                     | -2.412988 | 0.745964  | 0.000000  |
| C                    | 0.000000  | 0.000000  | 3.335500  | C                     | -1.406265 | -0.121737 | 0.000000  |
| C                    | 0.000000  | 0.000000  | 0.669896  | C                     | 0.000000  | 0.251327  | 0.000000  |
| C                    | 0.000000  | 1.216831  | -0.046161 | C                     | 1.001864  | -0.624254 | 0.000000  |
| C                    | 0.000000  | -1.216831 | -0.046161 | H                     | -3.442827 | 0.417531  | 0.000000  |
| C                    | 0.000000  | 1.210125  | -1.423103 | H                     | -1.622387 | -1.185896 | 0.000000  |
| H                    | 0.000000  | 2.143623  | 0.509225  | H                     | 0.222638  | 1.315124  | 0.000000  |
| C                    | 0.000000  | -1.210125 | -1.423103 | H                     | 0.762671  | -1.684292 | 0.000000  |
| H                    | 0.000000  | -2.143623 | 0.509225  | C                     | 2.451693  | -0.270595 | 0.000000  |
| C                    | 0.000000  | 0.000000  | -2.111120 | H                     | 2.954862  | -0.685119 | 0.876410  |
| H                    | 0.000000  | 2.142392  | -1.969839 | H                     | 2.954862  | -0.685119 | -0.876410 |
| H                    | 0.000000  | -2.142392 | -1.969839 | H                     | 2.599580  | 0.808854  | 0.000000  |
| H                    | 0.000000  | 0.000000  | -3.192694 | H                     | -2.235227 | 1.814693  | 0.000000  |
| <b>i13</b>           |           |           |           | <b>i14</b>            |           |           |           |
| C                    | 3.078027  | -1.258176 | -0.173388 | C                     | -0.147276 | -1.579795 | -0.221765 |
| C                    | 3.013173  | 0.095583  | 0.062294  | C                     | 0.894804  | -2.355638 | -0.313507 |
| C                    | 4.107896  | 0.925561  | 0.193023  | C                     | 2.297209  | -2.039071 | -0.005815 |
| H                    | 1.96762   | -2.705415 | -1.274555 | C                     | 2.867663  | -0.836498 | 0.142602  |
| C                    | 1.899803  | -2.177878 | -0.31642  | C                     | 2.233325  | 0.46036   | 0.007572  |
| H                    | 1.957356  | -2.962879 | 0.445923  | C                     | 2.864768  | 1.610535  | 0.240645  |
| H                    | 2.026223  | 0.541353  | 0.152489  | H                     | 0.72577   | -3.382302 | -0.642248 |
| H                    | 5.09964   | 0.493572  | 0.105101  | H                     | 2.934671  | -2.909011 | 0.096002  |
| C                    | 0.594642  | -1.533993 | -0.228403 | H                     | 3.92725   | -0.81851  | 0.377147  |
| C                    | -0.473799 | -0.992433 | -0.157701 | H                     | 1.194956  | 0.488858  | -0.299889 |
| C                    | -1.744711 | -0.341768 | -0.076097 | H                     | 3.904113  | 1.580461  | 0.557412  |
| C                    | -2.702322 | -0.767924 | 0.845601  | C                     | -1.237473 | -0.76196  | -0.117481 |
| C                    | -2.043171 | 0.731841  | -0.916733 | C                     | -1.641585 | 0.062486  | -1.20574  |
| C                    | -3.929547 | -0.132975 | 0.922201  | C                     | -1.992811 | -0.688489 | 1.086605  |
| H                    | -2.473426 | -1.598803 | 1.498129  | C                     | -2.727838 | 0.897485  | -1.083897 |
| C                    | -3.271879 | 1.363393  | -0.834478 | H                     | -1.0788   | 0.01993   | -2.127881 |
| H                    | -1.303507 | 1.062719  | -1.632411 | C                     | -3.075451 | 0.154019  | 1.181057  |
| C                    | -4.218185 | 0.933697  | 0.083906  | H                     | -1.697549 | -1.304171 | 1.924403  |
| H                    | -4.663853 | -0.472183 | 1.640088  | C                     | -3.454905 | 0.953322  | 0.103795  |
| H                    | -3.491765 | 2.194331  | -1.490852 | H                     | -3.018967 | 1.516214  | -1.92223  |
| H                    | -5.177778 | 1.428417  | 0.146108  | H                     | -3.636788 | 0.195777  | 2.104887  |



|            |           |           |           |            |           |           |           |
|------------|-----------|-----------|-----------|------------|-----------|-----------|-----------|
| H          | 4.048652  | -1.732534 | -0.265349 | H          | -4.307249 | 1.612394  | 0.189196  |
| C          | 4.021527  | 2.389454  | 0.449581  | C          | 2.247892  | 2.962206  | 0.106084  |
| H          | 2.986066  | 2.721597  | 0.521815  | H          | 1.207281  | 2.89469   | -0.209541 |
| H          | 4.529595  | 2.661199  | 1.379282  | H          | 2.284215  | 3.503421  | 1.054231  |
| H          | 4.506453  | 2.96233   | -0.346085 | H          | 2.791162  | 3.568484  | -0.622425 |
| <b>i15</b> |           |           |           | <b>i16</b> |           |           |           |
| C          | 0.566634  | -0.230876 | -0.095801 | C          | 0.600724  | -0.248227 | -0.119385 |
| C          | 1.216232  | -1.372154 | -0.082607 | C          | 1.237631  | -1.463036 | -0.145881 |
| C          | 1.38649   | 1.058246  | -0.119465 | C          | 1.405225  | 1.029858  | -0.09294  |
| C          | 2.856817  | 0.789953  | -0.286982 | C          | 2.877311  | 0.805008  | -0.248552 |
| C          | 3.429323  | -0.403447 | -0.286561 | C          | 3.436273  | -0.422961 | -0.269233 |
| C          | 2.650021  | -1.687947 | -0.141386 | C          | 2.629412  | -1.585481 | -0.202517 |
| H          | 1.065015  | 1.65172   | -0.982493 | H          | 0.642123  | -2.366814 | -0.164329 |
| H          | 3.480544  | 1.671329  | -0.390672 | H          | 1.080133  | 1.67391   | -0.921243 |
| H          | 4.503702  | -0.492192 | -0.396812 | H          | 3.499011  | 1.689922  | -0.308723 |
| H          | 2.971793  | -2.225559 | 0.755995  | H          | 4.510402  | -0.526145 | -0.352198 |
| H          | 2.865335  | -2.354451 | -0.982309 | H          | 3.083943  | -2.565019 | -0.233452 |
| C          | -0.914368 | -0.158775 | -0.080331 | C          | -0.867343 | -0.163422 | -0.096505 |
| C          | -1.660442 | -1.203512 | 0.467466  | C          | -1.546421 | 0.895755  | -0.70746  |
| C          | -1.603295 | 0.926855  | -0.617494 | C          | -1.638052 | -1.142603 | 0.540173  |
| C          | -3.042847 | -1.17078  | 0.465169  | C          | -2.929052 | 0.960635  | -0.702695 |
| H          | -1.137757 | -2.044233 | 0.904375  | H          | -0.989373 | 1.673717  | -1.211165 |
| C          | -2.989277 | 0.962128  | -0.618582 | C          | -3.019651 | -1.076985 | 0.54714   |
| H          | -1.059393 | 1.754965  | -1.050865 | H          | -1.1448   | -1.952166 | 1.060551  |
| C          | -3.715867 | -0.085822 | -0.078641 | C          | -3.674959 | -0.025997 | -0.077119 |
| H          | -3.598771 | -1.992365 | 0.896784  | H          | -3.426242 | 1.786697  | -1.193311 |
| H          | -3.501425 | 1.814004  | -1.045509 | H          | -3.588069 | -1.845487 | 1.0537    |
| H          | -4.796897 | -0.056644 | -0.07641  | H          | -4.754926 | 0.02704   | -0.069402 |
| C          | 1.14432   | 1.900314  | 1.140699  | C          | 1.134342  | 1.827162  | 1.202912  |
| H          | 1.45536   | 1.345163  | 2.026009  | H          | 0.075985  | 2.065591  | 1.299961  |
| H          | 0.09136   | 2.156315  | 1.249915  | H          | 1.438127  | 1.241741  | 2.070688  |
| H          | 1.718683  | 2.826856  | 1.099083  | H          | 1.701042  | 2.758782  | 1.2013    |
| <b>i17</b> |           |           |           | <b>i18</b> |           |           |           |
| C          | 3.320409  | 0.134033  | -0.221069 | C          | 0.098182  | -0.899266 | -0.447909 |
| C          | 2.935192  | 1.327612  | 0.347238  | C          | 1.326361  | -1.268388 | -0.660317 |
| C          | 3.80584   | 2.328332  | 0.71893   | C          | 2.55939   | -0.68411  | -0.085305 |
| C          | 2.411465  | -0.993372 | -0.625581 | C          | 2.718301  | 0.605913  | 0.240295  |
| H          | 1.873858  | 1.484365  | 0.510043  | C          | 1.764165  | 1.685968  | 0.06288   |

|            |           |           |           |            |           |           |           |
|------------|-----------|-----------|-----------|------------|-----------|-----------|-----------|
| H          | 4.873699  | 2.222659  | 0.577294  | C          | 1.962134  | 2.919851  | 0.519326  |
| C          | 0.991904  | -0.686042 | -0.46134  | H          | 1.492851  | -2.138877 | -1.299141 |
| C          | -0.175338 | -0.449029 | -0.312902 | H          | 3.672707  | 0.895994  | 0.669588  |
| C          | -1.564749 | -0.157338 | -0.140793 | H          | 0.851814  | 1.466939  | -0.477288 |
| C          | -2.370832 | -0.985317 | 0.64191   | H          | 2.85546   | 3.180755  | 1.074448  |
| C          | -2.132498 | 0.961767  | -0.751951 | C          | -1.199971 | -0.535392 | -0.225278 |
| C          | -3.714371 | -0.698138 | 0.807517  | C          | -1.845856 | 0.422453  | -1.056937 |
| H          | -1.932917 | -1.852106 | 1.116782  | C          | -1.946444 | -1.091716 | 0.85104   |
| C          | -3.476608 | 1.243874  | -0.581854 | C          | -3.149171 | 0.78975   | -0.816609 |
| H          | -1.509929 | 1.603809  | -1.359305 | H          | -1.295417 | 0.853326  | -1.881904 |
| C          | -4.271126 | 0.416027  | 0.197273  | C          | -3.248546 | -0.707415 | 1.068329  |
| H          | -4.329488 | -1.346759 | 1.416204  | H          | -1.470406 | -1.818032 | 1.494455  |
| H          | -3.905777 | 2.113798  | -1.060012 | C          | -3.863106 | 0.232758  | 0.242666  |
| H          | -5.32123  | 0.638478  | 0.328523  | H          | -3.622805 | 1.519212  | -1.459852 |
| H          | 4.376648  | -0.04811  | -0.391754 | H          | -3.79975  | -1.140994 | 1.891973  |
| H          | 3.447944  | 3.245774  | 1.162088  | H          | -4.886929 | 0.528186  | 0.423235  |
| C          | 2.779293  | -2.287211 | 0.125855  | H          | 1.23549   | 3.703684  | 0.358004  |
| H          | 2.613456  | -2.161348 | 1.194939  | C          | 3.673495  | -1.674948 | 0.102708  |
| H          | 2.172009  | -3.120022 | -0.225859 | H          | 3.367865  | -2.482642 | 0.771431  |
| H          | 3.829898  | -2.52878  | -0.035591 | H          | 3.942747  | -2.137036 | -0.850469 |
| H          | 2.580342  | -1.182946 | -1.692751 | H          | 4.562764  | -1.203262 | 0.516187  |
| <b>i19</b> |           |           |           | <b>i20</b> |           |           |           |
| C          | 0.34457   | 0.23866   | -0.107362 | C          | -0.347407 | 0.247254  | 0.000866  |
| C          | 1.195942  | -0.743292 | -0.302259 | C          | -1.2507   | -0.788799 | 0.102368  |
| C          | 0.920473  | 1.634737  | 0.056864  | C          | -0.85797  | 1.659083  | -0.092762 |
| C          | 2.414539  | 1.676664  | -0.047669 | C          | -2.342559 | 1.771297  | -0.196457 |
| C          | 3.189133  | 0.622172  | -0.24916  | C          | -3.15304  | 0.702608  | -0.114293 |
| C          | 2.666481  | -0.791868 | -0.37935  | C          | -2.634041 | -0.616944 | 0.062426  |
| H          | 0.612244  | 2.048125  | 1.023245  | H          | -0.880439 | -1.798109 | 0.230102  |
| H          | 2.870958  | 2.654903  | 0.048989  | H          | -0.524268 | 2.23667   | 0.783351  |
| H          | 4.265248  | 0.741941  | -0.31381  | H          | -2.756798 | 2.762839  | -0.325735 |
| C          | -1.121751 | 0.050445  | -0.04635  | H          | -4.226679 | 0.83412   | -0.180751 |
| C          | -1.986262 | 1.120659  | 0.170783  | C          | 1.100107  | 0.029461  | 0.001415  |
| C          | -1.678284 | -1.221442 | -0.205987 | C          | 1.987494  | 1.093275  | 0.210768  |
| C          | -3.359799 | 0.928476  | 0.226522  | C          | 1.663429  | -1.236174 | -0.221623 |
| H          | -1.594478 | 2.11983   | 0.299682  | C          | 3.358973  | 0.899956  | 0.219939  |
| C          | -3.044323 | -1.413639 | -0.150935 | H          | 1.606094  | 2.089555  | 0.382018  |
| H          | -1.018354 | -2.062735 | -0.375215 | C          | 3.030914  | -1.427649 | -0.213043 |
| C          | -3.895254 | -0.336767 | 0.066209  | H          | 1.024303  | -2.082233 | -0.429708 |

|                 |           |           |           |                 |           |           |           |
|-----------------|-----------|-----------|-----------|-----------------|-----------|-----------|-----------|
| H               | -4.010707 | 1.77561   | 0.396542  | C               | 3.891372  | -0.36105  | 0.011554  |
| H               | -3.451231 | -2.407964 | -0.277787 | H               | 4.014184  | 1.743464  | 0.392062  |
| H               | -4.965342 | -0.48689  | 0.109414  | H               | 3.431058  | -2.416494 | -0.393377 |
| H               | 0.486159  | 2.299921  | -0.697335 | H               | 4.961972  | -0.512424 | 0.01559   |
| H               | 2.961374  | -1.177494 | -1.361962 | H               | -0.385935 | 2.171553  | -0.941534 |
| C               | 3.27899   | -1.71241  | 0.6849    | C               | -3.575023 | -1.773157 | 0.193067  |
| H               | 2.920875  | -2.734201 | 0.564273  | H               | -3.039935 | -2.71695  | 0.287752  |
| H               | 4.366551  | -1.717563 | 0.603496  | H               | -4.217991 | -1.662176 | 1.070153  |
| H               | 3.009974  | -1.36786  | 1.68324   | H               | -4.234853 | -1.84478  | -0.675277 |
| <b>i26</b>      |           |           |           | <b>i27</b>      |           |           |           |
| C               | 3.702592  | -0.791386 | 0.423214  | C               | 3.723179  | -0.559554 | -0.239022 |
| C               | 3.608147  | 0.263789  | -0.370671 | C               | 3.337485  | 0.738035  | -0.255069 |
| C               | 2.188687  | 0.61193   | -0.730842 | C               | 1.843642  | 0.836691  | -0.135094 |
| H               | 2.183195  | -1.437219 | 1.831203  | H               | 2.597165  | -2.478409 | -0.110646 |
| C               | 2.364161  | -1.386783 | 0.7558    | C               | 2.580407  | -1.398865 | -0.141618 |
| H               | 4.446992  | 0.839041  | -0.739401 | H               | 3.983318  | 1.601433  | -0.308227 |
| C               | 1.390446  | -0.436389 | 0.063324  | C               | 1.411274  | -0.622424 | -0.108564 |
| C               | 0.099787  | -0.466678 | 0.14583   | C               | 0.147645  | -1.16115  | -0.026358 |
| C               | -1.257301 | -0.265766 | 0.081701  | C               | -1.158745 | -0.53693  | -0.067485 |
| C               | -2.052669 | -0.906075 | -0.907222 | C               | -1.410658 | 0.760457  | -0.537304 |
| C               | -1.918487 | 0.573695  | 1.019619  | C               | -2.26401  | -1.29178  | 0.356309  |
| C               | -3.41333  | -0.706022 | -0.949957 | C               | -2.693146 | 1.277446  | -0.555812 |
| H               | -1.568236 | -1.551536 | -1.626608 | H               | -0.600976 | 1.365808  | -0.913734 |
| C               | -3.280449 | 0.758633  | 0.957075  | C               | -3.543793 | -0.772019 | 0.342704  |
| H               | -1.329529 | 1.066737  | 1.780539  | H               | -2.101538 | -2.302721 | 0.708571  |
| C               | -4.040855 | 0.124073  | -0.023201 | C               | -3.767277 | 0.520614  | -0.110377 |
| H               | -4.000116 | -1.199838 | -1.713057 | H               | -2.856634 | 2.279876  | -0.928466 |
| H               | -3.763575 | 1.404937  | 1.67774   | H               | -4.372247 | -1.377961 | 0.684292  |
| H               | -5.110499 | 0.274277  | -0.064075 | H               | -4.767785 | 0.9303    | -0.124713 |
| H               | 4.629168  | -1.205615 | 0.795477  | H               | 4.742206  | -0.913388 | -0.290756 |
| C               | 1.796968  | 2.048769  | -0.395176 | C               | 1.430038  | 1.608591  | 1.124527  |
| H               | 0.747813  | 2.225243  | -0.632913 | H               | 0.34794   | 1.637791  | 1.237634  |
| H               | 1.944699  | 2.245968  | 0.667261  | H               | 1.851755  | 1.127407  | 2.006956  |
| H               | 2.266818  | -2.405641 | 0.372294  | H               | 1.441794  | 1.341592  | -1.018389 |
| H               | 2.027504  | 0.454035  | -1.802082 | H               | 1.799847  | 2.633349  | 1.084113  |
| H               | 2.399578  | 2.758868  | -0.963347 | H               | 0.118898  | -2.239749 | 0.092342  |
| <b>tsi13i14</b> |           |           |           | <b>tsi13i15</b> |           |           |           |
| C               | 0.552634  | -0.911869 | -0.066411 | C               | 0.509956  | -0.798304 | 0.029748  |

|                 |           |           |           |                |           |           |           |
|-----------------|-----------|-----------|-----------|----------------|-----------|-----------|-----------|
| C               | -0.523752 | -1.492212 | 0.087286  | C              | 1.51779   | -1.51107  | 0.11211   |
| C               | -1.827599 | -2.08831  | 0.074959  | C              | 2.984045  | -1.459624 | 0.022502  |
| C               | -3.028318 | -1.386188 | 0.039609  | C              | 3.459749  | -0.056841 | 0.327008  |
| C               | -3.132874 | 0.028441  | -0.046678 | C              | 2.717536  | 1.03518   | 0.104987  |
| C               | -4.293039 | 0.713072  | -0.032814 | C              | 1.450019  | 1.068806  | -0.596194 |
| H               | -1.83795  | -3.169663 | 0.032287  | H              | 3.447364  | -2.160529 | 0.718004  |
| H               | -3.937716 | -1.968033 | 0.120098  | H              | 3.293927  | -1.776781 | -0.979034 |
| H               | -2.203888 | 0.585417  | -0.135032 | H              | 4.40463   | 0.035307  | 0.846845  |
| H               | -5.222706 | 0.158522  | 0.056771  | H              | 3.062936  | 1.978281  | 0.521508  |
| H               | -1.005503 | -1.894473 | 1.229599  | H              | 1.435801  | 0.655557  | -1.597343 |
| C               | -4.404771 | 2.196049  | -0.140714 | C              | -0.907401 | -0.538716 | 0.064945  |
| H               | -4.909513 | 2.618505  | 0.731861  | C              | -1.512667 | -0.087275 | 1.237362  |
| H               | -3.424503 | 2.664467  | -0.226138 | C              | -1.68316  | -0.685902 | -1.084671 |
| H               | -4.996355 | 2.484535  | -1.013295 | C              | -2.866375 | 0.201241  | 1.259886  |
| C               | 1.805655  | -0.274541 | -0.033199 | H              | -0.910414 | 0.032885  | 2.127256  |
| C               | 2.99093   | -1.006184 | -0.212984 | C              | -3.03649  | -0.394915 | -1.057987 |
| C               | 1.89686   | 1.112449  | 0.168965  | H              | -1.215065 | -1.033066 | -1.995578 |
| C               | 4.216268  | -0.369589 | -0.182451 | C              | -3.631838 | 0.050096  | 0.11311   |
| H               | 2.932379  | -2.073374 | -0.375237 | H              | -3.325645 | 0.546544  | 2.176198  |
| C               | 3.129032  | 1.736006  | 0.192649  | H              | -3.628912 | -0.517024 | -1.954626 |
| H               | 0.990782  | 1.686086  | 0.306428  | H              | -4.688867 | 0.277589  | 0.132057  |
| C               | 4.295119  | 1.002229  | 0.018975  | C              | 0.53569   | 2.232255  | -0.373333 |
| H               | 5.119786  | -0.948342 | -0.319535 | H              | 0.385762  | 2.421824  | 0.690445  |
| H               | 3.181335  | 2.804957  | 0.349773  | H              | -0.440326 | 2.06795   | -0.827415 |
| H               | 5.25697   | 1.495289  | 0.039288  | H              | 0.957682  | 3.141873  | -0.815151 |
| <b>tsi13i27</b> |           |           |           | <b>tsi13p8</b> |           |           |           |
| C               | 3.731573  | -0.573131 | 0.379896  | C              | -2.981844 | -1.364942 | -0.109241 |
| C               | 3.501232  | 0.663009  | -0.04862  | C              | -3.124487 | 0.062993  | -0.016478 |
| C               | 2.232889  | 0.973669  | -0.705693 | C              | -4.306419 | 0.686427  | -0.045336 |
| H               | 2.584875  | -2.221459 | 1.143438  | H              | -1.804043 | -3.107515 | -0.224438 |
| C               | 2.630376  | -1.588008 | 0.254866  | C              | -1.803419 | -2.038043 | -0.060408 |
| H               | 4.235304  | 1.450135  | 0.105351  | H              | -3.890253 | -1.94941  | -0.197509 |
| C               | 1.321515  | -0.923875 | 0.064294  | H              | -2.213879 | 0.645349  | 0.080813  |
| C               | 0.105097  | -0.824192 | 0.119433  | C              | 0.549988  | -0.877348 | -0.028249 |
| C               | -1.264307 | -0.466388 | 0.089741  | H              | -5.207296 | 0.08677   | -0.142184 |
| C               | -2.050278 | -0.732165 | -1.039555 | C              | -0.531573 | -1.404637 | -0.0366   |
| C               | -1.859441 | 0.167967  | 1.188845  | H              | -1.803594 | -2.651534 | 1.884176  |
| C               | -3.384022 | -0.369181 | -1.065938 | C              | 1.830996  | -0.25095  | -0.01596  |
| H               | -1.599007 | -1.223551 | -1.890253 | C              | 1.938125  | 1.141374  | 0.011061  |

|                 |           |           |           |                |           |           |           |
|-----------------|-----------|-----------|-----------|----------------|-----------|-----------|-----------|
| C               | -3.193552 | 0.527401  | 1.152304  | C              | 2.995933  | -1.021322 | -0.029842 |
| H               | -1.259046 | 0.374937  | 2.063753  | C              | 3.182386  | 1.745892  | 0.023969  |
| C               | -3.962069 | 0.261623  | 0.027056  | H              | 1.038095  | 1.740126  | 0.021777  |
| H               | -3.97759  | -0.579466 | -1.945404 | C              | 4.236781  | -0.409894 | -0.017093 |
| H               | -3.638206 | 1.018571  | 2.007293  | H              | 2.915544  | -2.099062 | -0.04973  |
| H               | -5.005598 | 0.543739  | 0.002554  | C              | 4.334516  | 0.973585  | 0.009864  |
| H               | 4.668462  | -0.867722 | 0.833498  | H              | 3.253346  | 2.824802  | 0.045236  |
| C               | 1.426682  | 2.163931  | -0.311007 | H              | 5.132193  | -1.016211 | -0.027665 |
| H               | 0.390576  | 2.050825  | -0.632593 | H              | 5.305938  | 1.448537  | 0.0201    |
| H               | 1.433298  | 2.304226  | 0.770356  | C              | -4.496408 | 2.16196   | 0.045097  |
| H               | 2.816174  | -2.260149 | -0.589317 | H              | -5.009734 | 2.54316   | -0.840631 |
| H               | 2.124535  | 0.643797  | -1.733113 | H              | -5.119138 | 2.42159   | 0.904176  |
| H               | 1.812054  | 3.08215   | -0.76929  | H              | -3.544631 | 2.682839  | 0.141181  |
| <b>tsi14i16</b> |           |           |           | <b>tsi14p8</b> |           |           |           |
| C               | -0.453281 | -0.717877 | -0.113109 | C              | 0.470442  | -0.955873 | 0.119551  |
| C               | -1.354661 | -1.661104 | -0.316355 | C              | -0.558501 | -1.586356 | 0.258134  |
| C               | -2.793132 | -1.537943 | -0.167084 | C              | -1.882106 | -2.112358 | 0.168376  |
| C               | -3.477459 | -0.370432 | -0.141901 | C              | -2.979113 | -1.354914 | 0.027922  |
| C               | -2.841759 | 0.910743  | -0.08956  | C              | -3.005465 | 0.091011  | -0.048245 |
| C               | -1.698112 | 1.13028   | 0.609768  | C              | -4.127317 | 0.794387  | -0.196798 |
| H               | -1.010787 | -2.606142 | -0.737404 | H              | -1.980696 | -3.187571 | 0.225504  |
| H               | -3.357006 | -2.457709 | -0.257253 | H              | -3.934919 | -1.86325  | -0.034882 |
| H               | -4.55187  | -0.406631 | -0.282314 | H              | -2.053417 | 0.607152  | 0.018268  |
| H               | -3.258741 | 1.712373  | -0.692132 | H              | -5.071022 | 0.259823  | -0.264454 |
| H               | -1.482709 | 0.472676  | 1.442537  | H              | 0.029893  | -2.786363 | 1.6821    |
| C               | 0.934857  | -0.461303 | -0.115568 | C              | 1.723327  | -0.291692 | 0.048142  |
| C               | 1.778084  | -1.029059 | 0.858031  | C              | 1.873512  | 0.995477  | 0.573631  |
| C               | 1.501482  | 0.426592  | -1.049809 | C              | 2.823363  | -0.916063 | -0.547895 |
| C               | 3.127581  | -0.734384 | 0.877677  | C              | 3.095102  | 1.639306  | 0.501692  |
| H               | 1.353286  | -1.7038   | 1.588679  | H              | 1.025526  | 1.477875  | 1.039377  |
| C               | 2.851935  | 0.711439  | -1.020896 | C              | 4.041731  | -0.2652   | -0.613861 |
| H               | 0.860713  | 0.877804  | -1.795292 | H              | 2.708722  | -1.911181 | -0.95383  |
| C               | 3.672951  | 0.135198  | -0.058507 | C              | 4.18176   | 1.012518  | -0.091381 |
| H               | 3.761878  | -1.186325 | 1.62851   | H              | 3.201057  | 2.634215  | 0.911995  |
| H               | 3.271265  | 1.388059  | -1.753407 | H              | 4.886825  | -0.757196 | -1.075524 |
| H               | 4.729488  | 0.36371   | -0.037711 | H              | 5.135879  | 1.518483  | -0.145515 |
| C               | -0.935538 | 2.414906  | 0.5837    | C              | -4.1998   | 2.281571  | -0.280964 |
| H               | 0.136663  | 2.227354  | 0.508343  | H              | -4.652079 | 2.596148  | -1.224097 |
| H               | -1.23355  | 3.040021  | -0.257596 | H              | -4.825402 | 2.686365  | 0.517675  |

|                 |           |           |           |                 |           |           |           |
|-----------------|-----------|-----------|-----------|-----------------|-----------|-----------|-----------|
| H               | -1.096327 | 2.976268  | 1.506716  | H               | -3.211978 | 2.734617  | -0.206445 |
| <b>tsi15i16</b> |           |           |           | <b>tsi16p7</b>  |           |           |           |
| C               | 0.535767  | -0.165976 | 0.174659  | C               | 2.845958  | 0.741515  | 0.197554  |
| C               | 1.175975  | -1.325679 | 0.511239  | C               | 3.436636  | -0.469059 | -0.092517 |
| C               | 1.431852  | 1.037336  | -0.066211 | C               | 1.447768  | 0.912191  | 0.162493  |
| C               | 2.662018  | 0.608448  | -0.83419  | C               | 0.647497  | -0.236152 | -0.065915 |
| C               | 3.160091  | -0.626781 | -0.785753 | C               | 1.262163  | -1.447685 | -0.349191 |
| C               | 2.48157   | -1.608644 | 0.065589  | C               | 2.642791  | -1.571473 | -0.378746 |
| H               | 0.899183  | 1.750329  | -0.697945 | H               | 3.462434  | 1.599109  | 0.434056  |
| H               | 3.161841  | 1.370985  | -1.420888 | H               | 4.514303  | -0.559229 | -0.087997 |
| H               | 4.054483  | -0.901168 | -1.328454 | H               | 0.640774  | -2.308898 | -0.55773  |
| H               | 3.056943  | -2.393127 | 0.544834  | H               | 3.094787  | -2.526148 | -0.609708 |
| H               | 1.466555  | -2.318966 | -0.342714 | H               | 1.396976  | 1.542959  | -1.563678 |
| C               | -0.918489 | -0.081726 | 0.052331  | C               | 0.863409  | 2.175741  | 0.750765  |
| C               | -1.708672 | -1.210386 | 0.318441  | H               | 0.658999  | 2.020637  | 1.812276  |
| C               | -1.580501 | 1.091477  | -0.327424 | H               | 1.567862  | 3.000268  | 0.657938  |
| C               | -3.081909 | -1.172925 | 0.185874  | H               | -0.06893  | 2.46736   | 0.277242  |
| H               | -1.218911 | -2.115413 | 0.651031  | C               | -0.835328 | -0.172544 | -0.045856 |
| C               | -2.959325 | 1.128537  | -0.455679 | C               | -1.532081 | 0.653529  | -0.92534  |
| H               | -1.022292 | 1.994765  | -0.527861 | C               | -1.559209 | -0.972275 | 0.833992  |
| C               | -3.719093 | -0.002135 | -0.205388 | C               | -2.91625  | 0.682207  | -0.920322 |
| H               | -3.663475 | -2.060111 | 0.398652  | H               | -0.977813 | 1.264532  | -1.62681  |
| H               | -3.441651 | 2.0504    | -0.752294 | C               | -2.945321 | -0.941631 | 0.84208   |
| H               | -4.795492 | 0.028914  | -0.304286 | H               | -1.027562 | -1.615756 | 1.523032  |
| C               | 1.816345  | 1.77995   | 1.223501  | C               | -3.627859 | -0.113421 | -0.034191 |
| H               | 2.360688  | 1.114605  | 1.893324  | H               | -3.441864 | 1.32388   | -1.614641 |
| H               | 0.920339  | 2.12703   | 1.738694  | H               | -3.491953 | -1.565307 | 1.53654   |
| H               | 2.448026  | 2.642785  | 1.005968  | H               | -4.709043 | -0.089067 | -0.029354 |
| <b>tsi17i26</b> |           |           |           | <b>tsi17i18</b> |           |           |           |
| C               | -3.61905  | -0.221965 | 0.186029  | C               | -0.217472 | 0.432014  | -0.062938 |
| C               | -3.253161 | -1.470834 | 0.457579  | C               | 0.97371   | 0.705756  | 0.096822  |
| C               | -1.957583 | -1.950393 | -0.001671 | C               | 2.377051  | 1.009839  | 0.086074  |
| C               | -2.628441 | 0.693821  | -0.484014 | C               | 3.356125  | 0.018047  | 0.022248  |
| H               | -3.89863  | -2.1242   | 1.037171  | C               | 3.101743  | -1.376554 | -0.081242 |
| H               | -1.818928 | -2.166748 | -1.052885 | C               | 4.05218   | -2.328968 | -0.092686 |
| C               | -1.253587 | 0.156196  | -0.313391 | H               | 4.386139  | 0.347284  | 0.092201  |
| C               | -0.038244 | 0.249973  | -0.229516 | H               | 2.062168  | -1.678917 | -0.160577 |
| C               | 1.367399  | 0.139286  | -0.094208 | H               | 5.102938  | -2.077704 | -0.016846 |

|                 |           |           |           |                |           |           |           |
|-----------------|-----------|-----------|-----------|----------------|-----------|-----------|-----------|
| C               | 1.97503   | 0.280593  | 1.159906  | H              | 3.798401  | -3.374988 | -0.185436 |
| C               | 2.175516  | -0.113692 | -1.209827 | H              | 1.560713  | 0.891836  | 1.247741  |
| C               | 3.346786  | 0.16815   | 1.289526  | C              | 2.743083  | 2.469907  | -0.030251 |
| H               | 1.356226  | 0.477386  | 2.024218  | H              | 2.709177  | 2.769633  | -1.07909  |
| C               | 3.546545  | -0.223981 | -1.070288 | H              | 2.048083  | 3.103878  | 0.51784   |
| H               | 1.712822  | -0.22233  | -2.180842 | H              | 3.749251  | 2.647092  | 0.346342  |
| C               | 4.138217  | -0.084082 | 0.177472  | C              | -1.589276 | 0.124116  | -0.032284 |
| H               | 3.802458  | 0.278015  | 2.264294  | C              | -2.556385 | 1.139323  | -0.112054 |
| H               | 4.158384  | -0.420875 | -1.940206 | C              | -2.020785 | -1.208814 | 0.06645   |
| H               | 5.210911  | -0.170644 | 0.282607  | C              | -3.901345 | 0.826254  | -0.086625 |
| H               | -4.588942 | 0.174455  | 0.458209  | H              | -2.235364 | 2.1684    | -0.193622 |
| H               | -1.321456 | -2.511796 | 0.670986  | C              | -3.369219 | -1.506854 | 0.088953  |
| C               | -2.722111 | 2.129523  | 0.043659  | H              | -1.28486  | -1.998616 | 0.125238  |
| H               | -2.511552 | 2.15359   | 1.112619  | C              | -4.31724  | -0.494973 | 0.013439  |
| H               | -2.005086 | 2.773937  | -0.461998 | H              | -4.633562 | 1.62015   | -0.146889 |
| H               | -3.724316 | 2.527123  | -0.121054 | H              | -3.684733 | -2.538557 | 0.166542  |
| H               | -2.835779 | 0.716516  | -1.560666 | H              | -5.371369 | -0.734052 | 0.031129  |
| <b>tsi17i19</b> |           |           |           | <b>tsi17p9</b> |           |           |           |
| C               | 0.250149  | -0.206281 | -0.298656 | C              | -0.201886 | 0.415112  | 0.028086  |
| C               | 1.309771  | -0.708635 | -0.684204 | C              | 0.975714  | 0.659885  | 0.04765   |
| C               | 2.776451  | -0.619158 | -0.630517 | C              | 2.364003  | 0.996169  | 0.046405  |
| C               | 3.154154  | 0.816592  | -0.317928 | C              | 3.321308  | 0.029616  | -0.036029 |
| C               | 2.369405  | 1.663537  | 0.361659  | C              | 3.080848  | -1.388048 | 0.022349  |
| C               | 1.134115  | 1.307789  | 1.020658  | C              | 4.051614  | -2.30213  | -0.032443 |
| H               | 3.187709  | -0.860482 | -1.6136   | H              | 4.353422  | 0.352779  | -0.116645 |
| H               | 4.075739  | 1.176528  | -0.758135 | H              | 2.048782  | -1.706562 | 0.11558   |
| H               | 2.649192  | 2.712769  | 0.375739  | H              | 5.092195  | -2.015274 | -0.123868 |
| H               | 1.142085  | 0.541658  | 1.782785  | H              | 2.470871  | 1.186274  | 2.014372  |
| C               | -1.186326 | -0.143847 | -0.16988  | C              | -1.595721 | 0.112763  | 0.00925   |
| C               | -1.882239 | 1.031993  | -0.448182 | C              | -2.030752 | -1.213518 | -0.035118 |
| C               | -1.899745 | -1.272976 | 0.232299  | C              | -2.542918 | 1.138545  | 0.03561   |
| C               | -3.260398 | 1.074722  | -0.333711 | C              | -3.383223 | -1.503874 | -0.052379 |
| H               | -1.331763 | 1.909243  | -0.759208 | H              | -1.299204 | -2.00914  | -0.055913 |
| C               | -3.278796 | -1.225264 | 0.347892  | C              | -3.893757 | 0.840705  | 0.017736  |
| H               | -1.361242 | -2.185148 | 0.448071  | H              | -2.207977 | 2.16568   | 0.071024  |
| C               | -3.963045 | -0.052883 | 0.065888  | C              | -4.31791  | -0.479308 | -0.026158 |
| H               | -3.788741 | 1.991547  | -0.557291 | H              | -3.709296 | -2.534378 | -0.086398 |
| H               | -3.820725 | -2.107858 | 0.659523  | H              | -4.61905  | 1.642544  | 0.038866  |
| H               | -5.039988 | -0.017164 | 0.157425  | H              | -5.374505 | -0.708983 | -0.039648 |

|                 |           |           |           |                |           |           |           |
|-----------------|-----------|-----------|-----------|----------------|-----------|-----------|-----------|
| H               | 0.404309  | 2.090767  | 1.187367  | C              | 2.690502  | 2.450139  | -0.196213 |
| C               | 3.366647  | -1.612874 | 0.383198  | H              | 2.439713  | 2.712993  | -1.225781 |
| H               | 3.10273   | -2.636585 | 0.118887  | H              | 2.11432   | 3.097295  | 0.461687  |
| H               | 4.452864  | -1.527255 | 0.404524  | H              | 3.750207  | 2.640218  | -0.036417 |
| H               | 2.986978  | -1.404311 | 1.38283   | H              | 3.833586  | -3.359788 | 0.010659  |
| <b>tsi18i20</b> |           |           |           | <b>tsi18p9</b> |           |           |           |
| C               | -0.234215 | -0.139248 | -0.050874 | C              | -0.166299 | -0.43581  | 0.066076  |
| C               | -1.286143 | -0.872769 | -0.358315 | C              | 1.004476  | -0.723815 | 0.210348  |
| C               | -2.697719 | -0.576144 | -0.127024 | C              | 2.402627  | -0.992081 | 0.035849  |
| C               | -3.17823  | 0.675638  | 0.064893  | C              | 3.293035  | 0.003446  | -0.091499 |
| C               | -2.350753 | 1.838612  | 0.210749  | C              | 2.991525  | 1.421262  | -0.056921 |
| C               | -1.183707 | 1.819523  | 0.889929  | C              | 3.912394  | 2.370815  | -0.198696 |
| H               | -1.106472 | -1.782683 | -0.935076 | H              | 4.334389  | -0.266667 | -0.23272  |
| H               | -4.2506   | 0.821027  | -0.015278 | H              | 1.95448   | 1.697819  | 0.094296  |
| H               | -2.648694 | 2.737641  | -0.318987 | H              | 4.956796  | 2.126652  | -0.351765 |
| H               | -1.004161 | 1.08173   | 1.657336  | H              | 0.925526  | -1.377353 | 2.050102  |
| C               | 1.17898   | -0.147168 | -0.06998  | C              | -1.551028 | -0.129009 | 0.017933  |
| C               | 1.901123  | -1.118057 | 0.64874   | C              | -2.491532 | -1.135897 | -0.221327 |
| C               | 1.900423  | 0.844525  | -0.759143 | C              | -1.992598 | 1.18383   | 0.210862  |
| C               | 3.282648  | -1.103731 | 0.656089  | C              | -3.839795 | -0.832436 | -0.264785 |
| H               | 1.357477  | -1.877044 | 1.194564  | H              | -2.151387 | -2.151107 | -0.369375 |
| C               | 3.280578  | 0.846276  | -0.746662 | C              | -3.342757 | 1.477986  | 0.165209  |
| H               | 1.355065  | 1.603259  | -1.303648 | H              | -1.267191 | 1.963193  | 0.397658  |
| C               | 3.980317  | -0.12523  | -0.040148 | C              | -4.269474 | 0.472896  | -0.072539 |
| H               | 3.821547  | -1.861355 | 1.209171  | H              | -4.559688 | -1.618058 | -0.448827 |
| H               | 3.819044  | 1.611426  | -1.289604 | H              | -3.674415 | 2.49601   | 0.31663   |
| H               | 5.061427  | -0.116785 | -0.029647 | H              | -5.324695 | 0.706419  | -0.107366 |
| H               | -0.512153 | 2.667952  | 0.878321  | H              | 3.65167   | 3.419292  | -0.165975 |
| C               | -3.637709 | -1.734579 | -0.312767 | C              | 2.797345  | -2.44044  | 0.003465  |
| H               | -4.67767  | -1.421887 | -0.23872  | H              | 2.516512  | -2.929698 | 0.937954  |
| H               | -3.488644 | -2.207962 | -1.28588  | H              | 2.279889  | -2.962106 | -0.803226 |
| H               | -3.459718 | -2.501209 | 0.444521  | H              | 3.870598  | -2.548873 | -0.141244 |
| <b>tsi19i20</b> |           |           |           | <b>tsi20p3</b> |           |           |           |
| C               | -0.341351 | 0.217102  | -0.386314 | C              | -2.272101 | 1.708952  | -0.475347 |
| C               | -1.220342 | -0.829777 | -0.288231 | C              | -3.125882 | 0.657846  | -0.225468 |
| C               | -0.975427 | 1.563047  | -0.670546 | C              | -0.887387 | 1.546434  | -0.338859 |
| C               | -2.182910 | 1.745777  | 0.217000  | C              | -0.360437 | 0.271105  | -0.065292 |
| C               | -2.910390 | 0.711049  | 0.632908  | C              | -1.247152 | -0.767676 | 0.192567  |



|                 |           |           |           |                  |           |           |           |
|-----------------|-----------|-----------|-----------|------------------|-----------|-----------|-----------|
| C               | -2.534220 | -0.647934 | 0.199326  | C                | -2.624852 | -0.594902 | 0.132525  |
| H               | -0.276288 | 2.383545  | -0.520842 | H                | -2.66644  | 2.675303  | -0.757672 |
| H               | -2.456944 | 2.754594  | 0.501435  | H                | -4.19581  | 0.799401  | -0.312309 |
| H               | -3.781005 | 0.847241  | 1.262085  | H                | -0.853432 | -1.740936 | 0.458797  |
| H               | -1.656288 | -1.290676 | 0.901864  | H                | -0.697346 | 2.348832  | 1.350476  |
| C               | 1.093074  | 0.043194  | -0.185606 | C                | 1.101029  | 0.050842  | -0.028005 |
| C               | 1.642889  | -1.248596 | -0.174778 | C                | 1.95892   | 1.022579  | 0.485666  |
| C               | 1.966760  | 1.116966  | 0.025361  | C                | 1.656068  | -1.134062 | -0.510867 |
| C               | 2.989540  | -1.452595 | 0.050484  | C                | 3.327597  | 0.813216  | 0.520095  |
| H               | 0.987330  | -2.086668 | -0.366481 | H                | 1.546044  | 1.939002  | 0.886671  |
| C               | 3.316853  | 0.909015  | 0.251741  | C                | 3.024338  | -1.342555 | -0.478501 |
| H               | 1.594363  | 2.131264  | 0.033191  | H                | 1.010468  | -1.889405 | -0.939099 |
| C               | 3.838237  | -0.374698 | 0.267200  | C                | 3.866256  | -0.369567 | 0.038259  |
| H               | 3.384579  | -2.459869 | 0.047277  | H                | 3.975222  | 1.575647  | 0.931594  |
| H               | 3.965429  | 1.758710  | 0.418815  | H                | 3.43515   | -2.265068 | -0.866124 |
| H               | 4.893813  | -0.534359 | 0.439371  | H                | 4.935151  | -0.531823 | 0.063719  |
| H               | -1.283599 | 1.638938  | -1.721044 | H                | -0.224166 | 2.330533  | -0.677235 |
| C               | -3.624933 | -1.656875 | -0.044377 | C                | -3.558153 | -1.726556 | 0.456505  |
| H               | -4.200612 | -1.359577 | -0.923078 | H                | -3.061158 | -2.691335 | 0.365622  |
| H               | -4.315379 | -1.715424 | 0.797970  | H                | -3.928174 | -1.639828 | 1.48018   |
| H               | -3.202075 | -2.641763 | -0.235576 | H                | -4.424969 | -1.724258 | -0.204296 |
| <b>tsi26i27</b> |           |           |           | <b>tsi27p11'</b> |           |           |           |
| C               | 3.340596  | -0.642340 | 0.877669  | C                | -3.73033  | -0.447949 | 0.115876  |
| C               | 3.320559  | 0.540452  | 0.243601  | C                | -3.16772  | 0.831658  | -0.279168 |
| C               | 2.223386  | 0.659945  | -0.815407 | C                | -1.808432 | 0.784093  | -0.248638 |
| H               | 0.998342  | -1.848759 | 0.786900  | H                | -2.796956 | -2.338142 | 0.657769  |
| C               | 2.294244  | -1.517522 | 0.328040  | C                | -2.723585 | -1.31082  | 0.336715  |
| H               | 4.030370  | 1.340822  | 0.407335  | H                | -3.745505 | 1.693701  | -0.578783 |
| C               | 1.441430  | -0.558291 | -0.424024 | C                | -1.453064 | -0.609871 | 0.124795  |
| C               | 0.232816  | -0.897304 | -0.017837 | C                | -0.26344  | -1.220998 | 0.215685  |
| C               | -1.136615 | -0.446902 | 0.038819  | C                | 1.078543  | -0.628904 | 0.144581  |
| C               | -2.131291 | -1.111330 | -0.687230 | C                | 1.418086  | 0.484399  | 0.909705  |
| C               | -1.510929 | 0.622361  | 0.861017  | C                | 2.058858  | -1.222161 | -0.650594 |
| C               | -3.449254 | -0.697527 | -0.617974 | C                | 2.697192  | 1.012114  | 0.854948  |
| H               | -1.853756 | -1.949780 | -1.311591 | H                | 0.672903  | 0.921621  | 1.561536  |
| C               | -2.831753 | 1.026925  | 0.932662  | C                | 3.332929  | -0.685702 | -0.716513 |
| H               | -0.753822 | 1.127966  | 1.444513  | H                | 1.812009  | -2.101903 | -1.231277 |
| C               | -3.805426 | 0.372260  | 0.191505  | C                | 3.654859  | 0.43501   | 0.035312  |
| H               | -4.204268 | -1.213855 | -1.195435 | H                | 2.947803  | 1.873938  | 1.458411  |

|           |           |           |           |           |           |           |           |
|-----------|-----------|-----------|-----------|-----------|-----------|-----------|-----------|
| H         | -3.103653 | 1.858012  | 1.569488  | H         | 4.078542  | -1.146317 | -1.350158 |
| H         | -4.837234 | 0.690927  | 0.248200  | H         | 4.652639  | 0.849699  | -0.009369 |
| H         | 4.066188  | -0.926319 | 1.626019  | H         | -4.785061 | -0.654498 | 0.210284  |
| C         | 1.451054  | 1.971650  | -0.792299 | C         | -0.901962 | 1.827604  | -0.825769 |
| H         | 0.627429  | 1.950165  | -1.505364 | H         | -0.248035 | 2.281121  | -0.084585 |
| H         | 1.034534  | 2.154684  | 0.197860  | H         | -0.261359 | 1.397546  | -1.597428 |
| H         | 2.574744  | -2.463400 | -0.129677 | H         | -1.697503 | 1.409308  | 1.771474  |
| H         | 2.687106  | 0.536396  | -1.801428 | H         | -1.496598 | 2.619367  | -1.279661 |
| H         | 2.101109  | 2.808872  | -1.048072 | H         | -0.284472 | -2.296268 | 0.370179  |
| <b>p3</b> |           |           |           | <b>p7</b> |           |           |           |
| C         | -0.371760 | 0.298903  | -0.070641 | C         | 0.67316   | -0.21917  | -0.06282  |
| C         | -1.258946 | -0.745667 | 0.180484  | C         | 1.45478   | 0.90635   | 0.23008   |
| C         | -0.890699 | 1.556139  | -0.366920 | C         | 1.29800   | -1.42693  | -0.36370  |
| C         | -2.634805 | -0.562758 | 0.143046  | C         | 2.83979   | 0.77865   | 0.19805   |
| C         | -2.260869 | 1.752882  | -0.411208 | C         | 2.67752   | -1.53520  | -0.39466  |
| C         | -3.127401 | 0.702761  | -0.159324 | C         | 3.45303   | -0.42295  | -0.11469  |
| H         | -0.219463 | 2.375000  | -0.588936 | H         | 0.68373   | -2.28933  | -0.58855  |
| H         | -2.655369 | 2.730436  | -0.654306 | H         | 3.44977   | 1.64187   | 0.43410   |
| H         | -4.197433 | 0.864587  | -0.199247 | H         | 3.14169   | -2.48146  | -0.63676  |
| C         | 1.092091  | 0.073076  | -0.025789 | H         | 4.53243   | -0.49018  | -0.13200  |
| C         | 1.940055  | 1.008190  | 0.564684  | C         | -0.81264  | -0.16910  | -0.04791  |
| C         | 1.654722  | -1.078450 | -0.573062 | C         | -1.53369  | -0.99152  | 0.81364   |
| C         | 3.308525  | 0.798642  | 0.607286  | C         | -1.51474  | 0.67349   | -0.90598  |
| H         | 1.519175  | 1.898420  | 1.013349  | C         | -2.91967  | -0.96762  | 0.82332   |
| C         | 3.023032  | -1.289236 | -0.531293 | H         | -0.99868  | -1.64779  | 1.48781   |
| H         | 1.014396  | -1.805459 | -1.055161 | C         | -2.89959  | 0.69685   | -0.90021  |
| C         | 3.855674  | -0.351287 | 0.059386  | H         | -0.96852  | 1.30491   | -1.59419  |
| H         | 3.948967  | 1.533110  | 1.076880  | C         | -3.60703  | -0.12229  | -0.03314  |
| H         | 3.440922  | -2.186039 | -0.968600 | H         | -3.46302  | -1.60969  | 1.50350   |
| H         | 4.924086  | -0.515365 | 0.092327  | H         | -3.42826  | 1.35323   | -1.57830  |
| H         | -0.864063 | -1.722962 | 0.431016  | H         | -4.68831  | -0.10293  | -0.02708  |
| C         | -3.572058 | -1.696816 | 0.454755  | C         | 0.84047   | 2.23038   | 0.59992   |
| H         | -3.086394 | -2.662319 | 0.320051  | H         | 0.51410   | 2.78150   | -0.28353  |
| H         | -3.916385 | -1.640857 | 1.489284  | H         | -0.03379  | 2.10180   | 1.23686   |
| H         | -4.453799 | -1.666827 | -0.185088 | H         | 1.56253   | 2.85241   | 1.12674   |
| <b>p8</b> |           |           |           | <b>p9</b> |           |           |           |
| C         | -3.289346 | -0.327849 | 0.000000  | C         | -3.116181 | -1.216892 | 0.000000  |
| C         | -2.691649 | -1.646486 | 0.000000  | C         | -2.358296 | -2.452509 | 0.000000  |

| C   | -3.402510 | -2.773487 | 0.000000  | C        | -2.918048 | -3.659501 | 0.000000  |
|-----|-----------|-----------|-----------|----------|-----------|-----------|-----------|
| H   | -3.163669 | 1.763085  | 0.000000  | C        | -2.591007 | 0.019408  | 0.000000  |
| C   | -2.613007 | 0.830735  | 0.000000  | H        | -4.197212 | -1.309600 | 0.000000  |
| H   | -4.372668 | -0.282213 | 0.000000  | H        | -1.277889 | -2.361664 | 0.000000  |
| H   | -1.607390 | -1.695065 | 0.000000  | C        | 0.000000  | 0.459472  | 0.000000  |
| C   | 0.000000  | 1.044411  | 0.000000  | H        | -3.994439 | -3.783082 | 0.000000  |
| H   | -4.486999 | -2.703797 | 0.000000  | C        | -1.182652 | 0.234940  | 0.000000  |
| C   | -1.199298 | 0.936267  | 0.000000  | C        | 1.404408  | 0.708462  | 0.000000  |
| C   | 1.420544  | 1.166985  | 0.000000  | C        | 2.310737  | -0.354152 | 0.000000  |
| C   | 2.229970  | 0.028519  | 0.000000  | C        | 1.892422  | 2.017105  | 0.000000  |
| C   | 2.023225  | 2.427148  | 0.000000  | C        | 3.672480  | -0.110248 | 0.000000  |
| C   | 3.607990  | 0.150912  | 0.000000  | H        | 1.935666  | -1.368037 | 0.000000  |
| H   | 1.766767  | -0.948267 | 0.000000  | C        | 3.255457  | 2.253542  | 0.000000  |
| C   | 3.401819  | 2.541949  | 0.000000  | H        | 1.192842  | 2.841204  | 0.000000  |
| H   | 1.399469  | 3.309967  | 0.000000  | C        | 4.149002  | 1.192439  | 0.000000  |
| C   | 4.198266  | 1.406173  | 0.000000  | H        | 4.365044  | -0.940809 | 0.000000  |
| H   | 4.224365  | -0.737721 | 0.000000  | H        | 3.622303  | 3.270858  | 0.000000  |
| H   | 3.857078  | 3.522919  | 0.000000  | H        | 5.213920  | 1.380295  | 0.000000  |
| H   | 5.275639  | 1.499014  | 0.000000  | H        | -2.319139 | -4.559315 | 0.000000  |
| C   | -2.826009 | -4.148952 | 0.000000  | C        | -3.446267 | 1.256742  | 0.000000  |
| H   | -3.157814 | -4.710172 | 0.876392  | H        | -4.504055 | 0.999735  | 0.000000  |
| H   | -3.157814 | -4.710172 | -0.876392 | H        | -3.234682 | 1.868785  | 0.878034  |
| H   | -1.736934 | -4.125528 | 0.000000  | H        | -3.234682 | 1.868785  | -0.878034 |
| p12 |           |           |           | vdW(i13) |           |           |           |
| C   | 3.753792  | -0.397965 | -0.124093 | C        | 2.382607  | -0.458733 | 0.398522  |
| C   | 3.163392  | 0.885937  | 0.258739  | C        | 1.846104  | 0.892869  | 0.349465  |
| C   | 1.818938  | 0.803981  | 0.255448  | C        | 1.377035  | 1.461294  | -0.758465 |
| H   | 2.851544  | -2.30994  | -0.635963 | H        | 2.847335  | -0.521892 | 2.453220  |
| C   | 2.764945  | -1.277181 | -0.336533 | H        | 2.387966  | -1.010148 | -0.537177 |
| H   | 3.730581  | 1.764154  | 0.532178  | H        | 1.829450  | 1.448142  | 1.283836  |
| C   | 1.482136  | -0.586438 | -0.130483 | C        | -0.416179 | -1.676116 | -1.582167 |
| C   | 0.301174  | -1.208252 | -0.247164 | H        | 1.397998  | 0.888189  | -1.681624 |
| C   | -1.04971  | -0.630205 | -0.161218 | H        | 3.227164  | -2.051319 | 1.488162  |
| C   | -1.437588 | 0.423915  | -0.983921 | C        | 2.839708  | -1.042225 | 1.502538  |
| C   | -1.986504 | -1.176482 | 0.714957  | C        | -1.054230 | -0.961872 | -0.571494 |
| C   | -2.720133 | 0.941675  | -0.909928 | C        | -1.852465 | 0.159756  | -0.884245 |
| H   | -0.727505 | 0.826524  | -1.693237 | C        | -0.870005 | -1.319025 | 0.780628  |
| C   | -3.264632 | -0.651208 | 0.798151  | C        | -2.430212 | 0.899576  | 0.121520  |
| H   | -1.702165 | -2.008957 | 1.34578   | H        | -1.985576 | 0.426216  | -1.923021 |

|                 |           |           |           |                 |           |           |           |
|-----------------|-----------|-----------|-----------|-----------------|-----------|-----------|-----------|
| C               | -3.634496 | 0.411464  | -0.013246 | C               | 0.306050  | -2.210334 | -2.479238 |
| H               | -3.006855 | 1.759166  | -1.557461 | C               | -1.450038 | -0.568171 | 1.778130  |
| H               | -3.975606 | -1.075002 | 1.494284  | H               | -0.246282 | -2.169585 | 1.011626  |
| H               | -4.634928 | 0.817654  | 0.046731  | C               | -2.225172 | 0.540102  | 1.451273  |
| H               | 4.812743  | -0.587561 | -0.209393 | H               | -3.036044 | 1.761999  | -0.118003 |
| C               | 0.878747  | 1.888109  | 0.671386  | H               | -1.296881 | -0.834526 | 2.814217  |
| H               | 0.342992  | 2.320468  | -0.173971 | H               | -2.674533 | 1.129490  | 2.239117  |
| H               | 0.123974  | 1.519457  | 1.36702   | C               | 0.809707  | 2.838602  | -0.841517 |
| H               | 1.431989  | 2.68907   | 1.160666  | H               | 1.376661  | 3.453646  | -1.543582 |
| H               | 0.332878  | -2.279131 | -0.429207 | H               | -0.219937 | 2.812616  | -1.206215 |
|                 |           |           |           | H               | 0.815216  | 3.332828  | 0.129743  |
| <b>vdW(i17)</b> |           |           |           | <b>tsi13vdW</b> |           |           |           |
| C               | 0.941026  | 1.684619  | -0.607519 | C               | 2.276771  | 0.735331  | 0.044183  |
| C               | 1.989412  | 1.093573  | 0.202105  | C               | 1.172249  | 1.67315   | 0.169721  |
| C               | 2.924533  | 0.266874  | -0.274493 | C               | 0.365126  | 2.010397  | -0.833266 |
| H               | -0.061594 | 2.737403  | 0.917772  | C               | 3.063007  | 0.366298  | 1.050476  |
| H               | 0.951159  | 1.436224  | -1.664442 | H               | 2.930405  | 0.772748  | 2.046508  |
| C               | 0.33679   | -1.705444 | -0.264343 | H               | 3.857799  | -0.351916 | 0.908311  |
| H               | 2.911664  | 0.024466  | -1.332757 | H               | 2.439455  | 0.304881  | -0.93918  |
| H               | -0.78594  | 2.882462  | -0.775003 | C               | 1.782749  | -2.71673  | -1.279687 |
| C               | -0.017839 | 2.475745  | -0.132514 | H               | 1.005669  | 2.102831  | 1.154281  |
| C               | -0.883028 | -1.054344 | -0.069306 | H               | 0.543508  | 1.570011  | -1.810395 |
| C               | -1.317063 | -0.72429  | 1.229353  | C               | -0.333235 | -1.505567 | -0.213827 |
| C               | -1.67753  | -0.681697 | -1.171387 | C               | -1.380445 | -1.035282 | -1.034407 |
| C               | -2.498474 | -0.039337 | 1.412351  | C               | -0.37682  | -1.243278 | 1.171245  |
| H               | -0.700294 | -1.009691 | 2.069374  | C               | 0.745576  | -2.190219 | -0.767939 |
| C               | 1.426608  | -2.326372 | -0.454246 | C               | -2.431261 | -0.33625  | -0.484014 |
| C               | -2.861853 | -0.004676 | -0.976336 | H               | -1.336909 | -1.236792 | -2.09512  |
| H               | -1.336508 | -0.935653 | -2.164779 | C               | -1.426717 | -0.532491 | 1.707827  |
| C               | -3.270933 | 0.319672  | 0.312457  | H               | 0.438973  | -1.591424 | 1.787547  |
| H               | -2.825662 | 0.218879  | 2.409693  | C               | -2.45305  | -0.080716 | 0.883606  |
| H               | -3.469528 | 0.278819  | -1.824124 | H               | -3.234743 | 0.019799  | -1.113324 |
| H               | -4.198326 | 0.856002  | 0.461412  | H               | -1.454003 | -0.324005 | 2.767957  |
| H               | 1.99051   | 1.343738  | 1.259627  | H               | -3.275561 | 0.477298  | 1.310272  |
| C               | 4.013275  | -0.351062 | 0.534002  | C               | -0.780655 | 2.960313  | -0.728494 |
| H               | 3.963145  | -0.040302 | 1.577183  | H               | -0.639179 | 3.819447  | -1.387959 |
| H               | 4.992085  | -0.073438 | 0.136759  | H               | -1.71351  | 2.479584  | -1.031801 |
| H               | 3.939726  | -1.438485 | 0.48854   | H               | -0.901672 | 3.327808  | 0.290359  |
| <b>tsi17vdW</b> |           |           |           |                 |           |           |           |

|   |            |           |           |   |            |           |           |
|---|------------|-----------|-----------|---|------------|-----------|-----------|
| C | -0.812916  | 1.815819  | 0.227812  |   |            |           |           |
| C | -1.955591  | 1.065793  | -0.2635   |   |            |           |           |
| C | -2.834447  | 0.451622  | 0.529683  |   |            |           |           |
| H | 0.007373   | 2.377735  | -1.629431 |   |            |           |           |
| H | -0.700236  | 1.870538  | 1.306529  |   |            |           |           |
| C | -0.352357  | -1.792138 | -0.251307 |   |            |           |           |
| H | -2.688902  | 0.517981  | 1.605039  |   |            |           |           |
| H | 0.926946   | 2.949805  | -0.133235 |   |            |           |           |
| C | 0.086534   | 2.412488  | -0.5496   |   |            |           |           |
| C | 0.84405    | -1.09599  | -0.07777  |   |            |           |           |
| C | 1.599145   | -0.682274 | -1.193228 |   |            |           |           |
| C | 1.301313   | -0.772822 | 1.215537  |   |            |           |           |
| C | 2.770433   | 0.021853  | -1.015902 |   |            |           |           |
| H | 1.238726   | -0.927579 | -2.181841 |   |            |           |           |
| C | -1.42244   | -2.456961 | -0.413095 |   |            |           |           |
| C | 2.470483   | -0.063681 | 1.380786  |   |            |           |           |
| H | 0.713889   | -1.088842 | 2.065616  |   |            |           |           |
| C | 3.205794   | 0.331692  | 0.267759  |   |            |           |           |
| H | 3.347916   | 0.336812  | -1.873537 |   |            |           |           |
| H | 2.81741    | 0.185114  | 2.373822  |   |            |           |           |
| H | 4.124215   | 0.886927  | 0.402434  |   |            |           |           |
| H | -2.080764  | 1.009175  | -1.341041 |   |            |           |           |
| C | -4.020132  | -0.323262 | 0.066979  |   |            |           |           |
| H | -4.100886  | -0.316882 | -1.019051 |   |            |           |           |
| H | -4.939243  | 0.08914   | 0.489449  |   |            |           |           |
| H | -3.945671  | -1.362754 | 0.390319  |   |            |           |           |
|   | <b>i34</b> |           |           |   | <b>i35</b> |           |           |
| C | 2.179582   | 1.018897  | 0.367674  | C | 0.394153   | 0.792956  | -0.214368 |
| C | 3.023459   | -0.063522 | -0.282683 | C | -0.797022  | 1.233273  | -0.260406 |
| C | 4.001213   | -0.712307 | 0.330729  | C | -2.211142  | 1.101526  | 0.225479  |
| H | 3.437542   | 2.809179  | -0.055058 | C | -2.988209  | -0.091612 | -0.151588 |
| H | 2.458539   | 1.056472  | 1.426463  | C | -3.833179  | -0.723106 | 0.65222   |
| H | 2.79202    | -0.271258 | -1.322444 | C | -1.8206    | 2.129819  | -0.82608  |
| C | -0.407381  | 0.406977  | 0.187305  | H | -2.137687  | 1.948883  | -1.845858 |
| H | 4.20567    | -0.484034 | 1.373472  | H | -1.802425  | 3.170072  | -0.528428 |
| H | 1.848395   | 2.7485    | -1.030976 | H | -2.398167  | 1.490616  | 1.219711  |
| C | 2.483936   | 2.344011  | -0.257734 | H | -2.827105  | -0.464336 | -1.160029 |
| C | -1.793111  | 0.06977   | 0.083173  | H | -3.976841  | -0.342976 | 1.659846  |
| C | -2.199947  | -1.264955 | 0.119296  | C | 1.647877   | 0.242734  | -0.08567  |

|            |           |           |           |            |           |           |           |
|------------|-----------|-----------|-----------|------------|-----------|-----------|-----------|
| C          | -2.757268 | 1.069258  | -0.056532 | C          | 2.053179  | -0.850716 | -0.895034 |
| C          | -3.541376 | -1.589508 | 0.01764   | C          | 2.581456  | 0.756793  | 0.851884  |
| H          | -1.454527 | -2.040305 | 0.227741  | C          | 3.313198  | -1.388556 | -0.763702 |
| C          | 0.755924  | 0.686676  | 0.281311  | H          | 1.354474  | -1.254382 | -1.61434  |
| C          | -4.097183 | 0.73822   | -0.157739 | C          | 3.835931  | 0.202115  | 0.965368  |
| H          | -2.444464 | 2.103685  | -0.083977 | H          | 2.289814  | 1.590321  | 1.475358  |
| C          | -4.493412 | -0.590456 | -0.121126 | C          | 4.215493  | -0.871504 | 0.163085  |
| H          | -3.844927 | -2.627131 | 0.046977  | H          | 3.602704  | -2.222964 | -1.388503 |
| H          | -4.835486 | 1.52112   | -0.265532 | H          | 4.532819  | 0.606982  | 1.687066  |
| H          | -5.541081 | -0.846553 | -0.200304 | H          | 5.20305   | -1.300291 | 0.259017  |
| C          | 4.862191  | -1.757913 | -0.301095 | C          | -4.61763  | -1.940089 | 0.282072  |
| H          | 5.91456   | -1.468037 | -0.269509 | H          | -5.690548 | -1.759627 | 0.376771  |
| H          | 4.778362  | -2.706418 | 0.233179  | H          | -4.413397 | -2.248271 | -0.743085 |
| H          | 4.585641  | -1.926105 | -1.341355 | H          | -4.377717 | -2.77583  | 0.942915  |
| <b>i36</b> |           |           |           | <b>i37</b> |           |           |           |
| C          | 2.343335  | -0.00179  | -0.286159 | C          | 0.05924   | 0.270848  | -0.151505 |
| C          | 2.90392   | 1.197168  | 0.457286  | C          | -1.205591 | 0.387176  | -0.179792 |
| C          | 3.794511  | 2.033881  | -0.04863  | C          | -2.531981 | -0.089663 | 0.345931  |
| H          | 2.649082  | 0.089339  | -1.335026 | C          | -3.011419 | -1.428604 | -0.032804 |
| H          | 2.553023  | 1.31356   | 1.476635  | C          | -3.660549 | -2.252001 | 0.777447  |
| C          | -0.31682  | -0.014748 | -0.154716 | C          | -2.434467 | 1.022217  | -0.690625 |
| H          | 4.192761  | 2.852694  | 0.534886  | H          | -2.718657 | 0.731076  | -1.696835 |
| H          | 4.151532  | 1.933041  | -1.066758 | H          | -2.770805 | 0.229424  | 1.354998  |
| H          | 2.403384  | -1.762397 | 1.074505  | H          | -2.794486 | -1.736846 | -1.051159 |
| C          | 2.932567  | -1.264943 | 0.273971  | H          | -3.884894 | -1.978497 | 1.801207  |
| C          | -1.744615 | -0.018757 | -0.075853 | C          | 1.418584  | 0.083726  | -0.060953 |
| C          | -2.455911 | 1.182199  | -0.072413 | C          | 2.08698   | -0.846136 | -0.899588 |
| C          | -2.44599  | -1.22315  | -0.000627 | C          | 2.198741  | 0.821265  | 0.867581  |
| C          | -3.837627 | 1.17539   | 0.004801  | C          | 3.449042  | -1.019369 | -0.804736 |
| H          | -1.914244 | 2.115873  | -0.131014 | H          | 1.507711  | -1.416551 | -1.612032 |
| C          | 0.881032  | -0.010375 | -0.228544 | C          | 3.559584  | 0.630471  | 0.944308  |
| C          | -3.827727 | -1.223239 | 0.076331  | H          | 1.705627  | 1.534155  | 1.513498  |
| H          | -1.89676  | -2.154266 | -0.003846 | C          | 4.198248  | -0.287021 | 0.113266  |
| C          | -4.527381 | -0.025627 | 0.07942   | H          | 3.940151  | -1.733984 | -1.451667 |
| H          | -4.378441 | 2.111962  | 0.006562  | H          | 4.136831  | 1.20111   | 1.659536  |
| H          | -4.360787 | -2.162472 | 0.134018  | H          | 5.267545  | -0.429834 | 0.180382  |
| H          | -5.607122 | -0.028303 | 0.139584  | C          | -2.767827 | 2.441938  | -0.311767 |
| C          | 4.320096  | -1.651406 | -0.075552 | H          | -2.263255 | 3.146632  | -0.972678 |
| H          | 5.045645  | -0.903762 | 0.270386  | H          | -3.842217 | 2.617786  | -0.378628 |

|                 |           |           |           |                 |           |           |           |
|-----------------|-----------|-----------|-----------|-----------------|-----------|-----------|-----------|
| H               | 4.59401   | -2.608314 | 0.364503  | H               | -2.448096 | 2.653526  | 0.708786  |
| H               | 4.451579  | -1.72458  | -1.160326 | H               | -3.98696  | -3.227078 | 0.444017  |
| <b>tsi13i35</b> |           |           |           | <b>tsi17i37</b> |           |           |           |
| C               | 0.357399  | -1.118527 | 0.316801  | C               | 0.012753  | 0.546659  | -0.344448 |
| C               | -0.791742 | -1.579891 | 0.341809  | C               | -1.222757 | 0.624451  | -0.386744 |
| C               | -2.34716  | -1.142863 | -0.362689 | C               | -2.570196 | -0.22271  | 0.370646  |
| C               | -2.932595 | 0.078515  | 0.116357  | C               | -2.76588  | -1.585603 | -0.038112 |
| C               | -3.333917 | 1.089622  | -0.664038 | C               | -2.846554 | -2.628594 | 0.795626  |
| C               | -2.030658 | -2.295894 | 0.537107  | C               | -2.623055 | 0.935115  | -0.578609 |
| H               | -2.45201  | -2.253606 | 1.537318  | H               | -2.994351 | 0.669005  | -1.566166 |
| H               | -2.087709 | -3.286931 | 0.099268  | H               | -2.585665 | 0.012918  | 1.426802  |
| H               | -2.323681 | -1.328081 | -1.42729  | H               | -2.836533 | -1.761253 | -1.107687 |
| H               | -3.030691 | 0.178595  | 1.194752  | H               | -2.772234 | -2.500446 | 1.868225  |
| H               | -3.224502 | 0.990513  | -1.739998 | C               | 1.374607  | 0.275123  | -0.169013 |
| C               | 1.555908  | -0.413953 | 0.155941  | C               | 2.042877  | -0.629247 | -1.015722 |
| C               | 1.900782  | 0.628589  | 1.037195  | C               | 2.110795  | 0.907065  | 0.85077   |
| C               | 2.450693  | -0.73533  | -0.882402 | C               | 3.387106  | -0.88827  | -0.840321 |
| C               | 3.08611   | 1.317141  | 0.876996  | H               | 1.487541  | -1.120048 | -1.802644 |
| H               | 1.222353  | 0.883592  | 1.839292  | C               | 3.454273  | 0.636531  | 1.013929  |
| C               | 3.631339  | -0.036078 | -1.030315 | H               | 1.608873  | 1.606017  | 1.505202  |
| H               | 2.199279  | -1.536563 | -1.56327  | C               | 4.101933  | -0.260032 | 0.172437  |
| C               | 3.958765  | 0.99254   | -0.154836 | H               | 3.884677  | -1.588094 | -1.498217 |
| H               | 3.333879  | 2.116977  | 1.561961  | H               | 4.004488  | 1.128835  | 1.804551  |
| H               | 4.305644  | -0.29439  | -1.835857 | H               | 5.154778  | -0.466965 | 0.304517  |
| H               | 4.885927  | 1.53537   | -0.275009 | C               | -3.144427 | 2.265057  | -0.080218 |
| C               | -3.931551 | 2.363214  | -0.165777 | H               | -2.847095 | 3.069879  | -0.751249 |
| H               | -4.934052 | 2.516597  | -0.572359 | H               | -4.232617 | 2.243762  | -0.019867 |
| H               | -4.001873 | 2.371463  | 0.921853  | H               | -2.746875 | 2.485759  | 0.910165  |
| H               | -3.33281  | 3.223955  | -0.473553 | H               | -2.993841 | -3.632643 | 0.425049  |
| <b>tsi34i35</b> |           |           |           | <b>tsi36i37</b> |           |           |           |
| C               | 0.389775  | 0.377239  | 0.089138  | C               | -0.07494  | 0.1095    | 0.214276  |
| C               | -0.785002 | 0.722445  | 0.001122  | C               | 1.147574  | -0.003873 | 0.201728  |
| C               | -2.205196 | 1.02686   | -0.006776 | C               | 2.597879  | -0.035492 | 0.285497  |
| C               | -3.136468 | -0.125962 | -0.178457 | C               | 3.319393  | 1.223234  | -0.061011 |
| C               | -4.213481 | -0.325127 | 0.564661  | C               | 4.315591  | 1.724284  | 0.649027  |
| C               | -1.755445 | 1.74853   | -1.236182 | C               | 2.348661  | -1.024114 | -0.811017 |
| H               | -1.80458  | 1.252997  | -2.192619 | H               | 2.376733  | -0.647838 | -1.82353  |
| H               | -1.478009 | 2.788064  | -1.182596 | H               | 2.967996  | -0.484066 | 1.206482  |
| H               | -2.505947 | 1.684115  | 0.806577  | H               | 2.979179  | 1.72713   | -0.959622 |

|   |           |           |           |   |           |           |           |
|---|-----------|-----------|-----------|---|-----------|-----------|-----------|
| H | -2.883687 | -0.82324  | -0.972048 | H | 4.66511   | 1.242339  | 1.554049  |
| H | -4.439464 | 0.383602  | 1.356697  | C | -1.478888 | 0.140544  | 0.127709  |
| C | 1.759635  | 0.053584  | 0.08334   | C | -2.12692  | 1.061693  | -0.711487 |
| C | 2.221396  | -1.094705 | -0.579874 | C | -2.264409 | -0.746213 | 0.88243   |
| C | 2.69324   | 0.868315  | 0.743753  | C | -3.505717 | 1.08716   | -0.790386 |
| C | 3.566524  | -1.408756 | -0.581071 | H | -1.532208 | 1.750747  | -1.29481  |
| H | 1.510089  | -1.729634 | -1.089381 | C | -3.642304 | -0.709769 | 0.794115  |
| C | 4.035714  | 0.543007  | 0.73457   | H | -1.776199 | -1.457853 | 1.533606  |
| H | 2.347605  | 1.75363   | 1.258948  | C | -4.272162 | 0.204287  | -0.040666 |
| C | 4.481228  | -0.594554 | 0.074043  | H | -3.988552 | 1.802467  | -1.442629 |
| H | 3.906     | -2.296549 | -1.097499 | H | -4.232066 | -1.400483 | 1.381762  |
| H | 4.742277  | 1.181926  | 1.247094  | H | -5.351051 | 0.228986  | -0.105685 |
| H | 5.532982  | -0.844953 | 0.070511  | C | 2.322507  | -2.490383 | -0.560802 |
| C | -5.163965 | -1.46717  | 0.405395  | H | 1.638235  | -2.999711 | -1.239304 |
| H | -6.17424  | -1.107961 | 0.19937   | H | 3.315031  | -2.934355 | -0.698546 |
| H | -4.862635 | -2.125649 | -0.408629 | H | 2.004901  | -2.70842  | 0.459893  |
| H | -5.218125 | -2.058592 | 1.3216    | H | 4.815291  | 2.635906  | 0.351861  |



**Table S7** Vibrational frequencies and infrared intensities on the **(a)** phenylethynyl + 1,3-butadiene- $d_6$ , **(b)** phenylethynyl + isoprene, and **(c)** phenylethynyl +1,3-pentadiene adiabatic doublet ground state potential energy surfaces.

**(a)**

| Normal modes | phenylethynyl                 |          | 1,3-Butadiene- $d_6$          |          |
|--------------|-------------------------------|----------|-------------------------------|----------|
|              | Frequency( $\text{cm}^{-1}$ ) | IR Inten | Frequency( $\text{cm}^{-1}$ ) | IR Inten |
| v1           | 112.68                        | 17.3904  | 142.31                        | 0.2856   |
| v2           | 148.66                        | 4.6072   | 254.19                        | 1.9456   |
| v3           | 251.55                        | 26.3028  | 396.63                        | 7.5858   |
| v4           | 393.87                        | 0        | 453.32                        | 0        |
| v5           | 477.42                        | 3.1292   | 628.27                        | 0        |
| v6           | 490.16                        | 18.9612  | 733.16                        | 0        |
| v7           | 511.05                        | 0.7921   | 751.59                        | 0        |
| v8           | 632.48                        | 0.1684   | 754.64                        | 68.0522  |
| v9           | 696.07                        | 46.3153  | 759.63                        | 1.5888   |
| v10          | 787.71                        | 0.2095   | 807.89                        | 0.293    |
| v11          | 799.2                         | 23.247   | 846.82                        | 0        |
| v12          | 870.13                        | 0        | 943.33                        | 0        |
| v13          | 981.96                        | 0.8822   | 1027.55                       | 6.0711   |
| v14          | 1019.66                       | 4.5667   | 1068.37                       | 1.5878   |
| v15          | 1024.97                       | 0        | 1069.32                       | 0        |
| v16          | 1044.22                       | 0.1747   | 1215.86                       | 0        |
| v17          | 1053.58                       | 0.6553   | 1602.41                       | 15.3095  |
| v18          | 1116.24                       | 5.0608   | 1684                          | 0        |
| v19          | 1185.47                       | 81.7314  | 2297.96                       | 0        |
| v20          | 1191.6                        | 3.3766   | 2298.46                       | 8.8991   |
| v21          | 1230.32                       | 21.1034  | 2348.47                       | 0        |
| v22          | 1324.35                       | 7.2501   | 2349.94                       | 4.0006   |
| v23          | 1358.66                       | 7.8198   | 2419.64                       | 11.1885  |
| v24          | 1483.47                       | 12.0342  | 2419.79                       | 0        |
| v25          | 1514.79                       | 1.8218   |                               |          |
| v26          | 1614.98                       | 0.511    |                               |          |
| v27          | 1639.86                       | 92.1565  |                               |          |
| v28          | 2020.99                       | 45.6399  |                               |          |
| v29          | 3200.68                       | 0.3554   |                               |          |
| v30          | 3213.21                       | 3.2854   |                               |          |
| v31          | 3219.82                       | 5.1552   |                               |          |

|     |           |         |           |         |
|-----|-----------|---------|-----------|---------|
| v32 | 3230.21   | 3.8096  |           |         |
| v33 | 3233.27   | 5.2791  |           |         |
|     | <b>i1</b> |         | <b>i3</b> |         |
| v1  | 6.38      | 0.0096  | 29.63     | 0.0318  |
| v2  | 40.46     | 0.431   | 79.5      | 0.326   |
| v3  | 64.02     | 0.4513  | 139.16    | 3.935   |
| v4  | 98.33     | 1.4504  | 145.27    | 0.6152  |
| v5  | 123.93    | 0.7464  | 233.43    | 1.9021  |
| v6  | 175.62    | 2.7305  | 301.81    | 0.0328  |
| v7  | 240.1     | 0.3268  | 340.99    | 0.0066  |
| v8  | 273.91    | 1.705   | 396.44    | 2.2334  |
| v9  | 319.22    | 1.0538  | 414.91    | 0.8252  |
| v10 | 394.91    | 0.0972  | 418.68    | 0.152   |
| v11 | 405.65    | 3.483   | 503.09    | 8.3091  |
| v12 | 417.68    | 0.0027  | 535.11    | 0.8369  |
| v13 | 428.17    | 0.3085  | 556.56    | 18.6198 |
| v14 | 540.85    | 0.8767  | 588.39    | 4.2815  |
| v15 | 556.55    | 5.8691  | 639.62    | 0.0317  |
| v16 | 571.71    | 0.2598  | 705.49    | 1.4721  |
| v17 | 631.52    | 4.8696  | 719.82    | 32.9323 |
| v18 | 642.56    | 0.2774  | 750.39    | 0.9507  |
| v19 | 651.52    | 34.4954 | 774.69    | 19.5781 |
| v20 | 715.38    | 2.4359  | 778.36    | 0.4143  |
| v21 | 720.88    | 34.2331 | 787.44    | 4.3497  |
| v22 | 741.15    | 0.7068  | 824.57    | 22.0862 |
| v23 | 767.64    | 6.1895  | 859.75    | 1.0149  |
| v24 | 792.61    | 40.601  | 871.04    | 0.0054  |
| v25 | 820.04    | 0.3697  | 873.21    | 0.2903  |
| v26 | 820.68    | 2.9999  | 879.38    | 0.379   |
| v27 | 876.99    | 0.0028  | 894.6     | 1.61    |
| v28 | 902.47    | 0.1572  | 931.39    | 0.2069  |
| v29 | 919.93    | 6.4778  | 945.73    | 0.6329  |
| v30 | 944.1     | 0.9247  | 954.21    | 3.1586  |
| v31 | 960.49    | 3.6022  | 971.16    | 1.3056  |
| v32 | 1014.07   | 0.0015  | 1010.12   | 0.0042  |
| v33 | 1028.25   | 0.1392  | 1027.95   | 0.1069  |
| v34 | 1033.19   | 0.0792  | 1028.44   | 0.0297  |
| v35 | 1053.23   | 2.8315  | 1066.68   | 5.6658  |
| v36 | 1055.97   | 5.8381  | 1079.83   | 3.4372  |

|     |         |         |         |         |
|-----|---------|---------|---------|---------|
| v37 | 1064.39 | 4.4082  | 1095.38 | 1.3425  |
| v38 | 1096.71 | 6.2909  | 1121.69 | 7.4337  |
| v39 | 1113.98 | 5.5469  | 1155.09 | 0.8421  |
| v40 | 1189.57 | 2.6612  | 1187.47 | 0.0297  |
| v41 | 1189.69 | 0.0567  | 1192.1  | 0.4208  |
| v42 | 1213.32 | 0.0042  | 1220.17 | 0.3943  |
| v43 | 1316.91 | 0.5616  | 1254.19 | 1.3034  |
| v44 | 1317.44 | 8.3619  | 1307.6  | 0.7452  |
| v45 | 1330.34 | 1.5317  | 1331.46 | 0.4507  |
| v46 | 1361.79 | 0.2929  | 1368.09 | 0.8146  |
| v47 | 1427.59 | 13.7763 | 1495.65 | 6.6225  |
| v48 | 1493.07 | 5.3533  | 1548.35 | 20.6937 |
| v49 | 1547.23 | 23.7527 | 1652.64 | 2.9505  |
| v50 | 1648.11 | 1.5617  | 1680.58 | 12.8293 |
| v51 | 1680.25 | 8.4328  | 1711.61 | 18.8351 |
| v52 | 2196.01 | 12.0727 | 1757.52 | 2.784   |
| v53 | 2248.92 | 3.8197  | 2198.21 | 8.3068  |
| v54 | 2291.83 | 5.1802  | 2204.4  | 22.1643 |
| v55 | 2333.53 | 12.8911 | 2255.24 | 10.1757 |
| v56 | 2345.02 | 2.1641  | 2260.78 | 4.8253  |
| v57 | 2379.88 | 0.622   | 2331.13 | 2.425   |
| v58 | 2428.69 | 4.9296  | 2370.77 | 13.3537 |
| v59 | 3192.31 | 0.8635  | 3185.07 | 3.1705  |
| v60 | 3200.93 | 2.9771  | 3192.62 | 0.4583  |
| v61 | 3210.97 | 13.4986 | 3202.4  | 13.9463 |
| v62 | 3217.99 | 18.361  | 3212.85 | 25.993  |
| v63 | 3223.74 | 8.1231  | 3220.71 | 11.4545 |

---

|     | <b>i2</b> |         | <b>i4</b> |        |
|-----|-----------|---------|-----------|--------|
| v1  | 18.9      | 0.3476  | 37.42     | 0.0934 |
| v2  | 28.94     | 0.0445  | 83.77     | 0.1701 |
| v3  | 58.03     | 0.4253  | 149.76    | 0.9882 |
| v4  | 121.19    | 0.2721  | 171.13    | 0.4509 |
| v5  | 127.62    | 0.7388  | 261.34    | 0.1391 |
| v6  | 159.43    | 0.3578  | 318.2     | 0.1551 |
| v7  | 189.15    | 2.5261  | 372.23    | 3.8126 |
| v8  | 273.91    | 1.6556  | 414.46    | 3.9152 |
| v9  | 331.21    | 10.8529 | 418.47    | 0.2313 |
| v10 | 406.61    | 0.5411  | 446.01    | 3.7971 |
| v11 | 412.15    | 0.0026  | 503.15    | 6.3525 |

|     |         |         |         |         |
|-----|---------|---------|---------|---------|
| v12 | 455.01  | 0.727   | 558.29  | 24.186  |
| v13 | 488.44  | 8.5663  | 562.93  | 2.4808  |
| v14 | 513.92  | 0.3417  | 597.55  | 1.4628  |
| v15 | 536.82  | 4.6598  | 626.55  | 2.8142  |
| v16 | 627.58  | 7.3274  | 639.11  | 0.0778  |
| v17 | 632.14  | 1.1544  | 711.79  | 5.6591  |
| v18 | 664.93  | 9.6043  | 715.78  | 35.0768 |
| v19 | 697.02  | 35.3781 | 766.28  | 15.7398 |
| v20 | 734.44  | 19.4853 | 772.54  | 2.0143  |
| v21 | 744.53  | 3.455   | 786.04  | 14.9749 |
| v22 | 761.82  | 4.9768  | 793.15  | 12.3158 |
| v23 | 764.25  | 25.0058 | 829.73  | 8.668   |
| v24 | 770.26  | 38.3626 | 845.92  | 0.1611  |
| v25 | 791.01  | 0.2058  | 854.28  | 3.717   |
| v26 | 841.25  | 2.1001  | 863.14  | 0.2915  |
| v27 | 843.43  | 0.2301  | 877.29  | 0.4286  |
| v28 | 847.77  | 0.0001  | 908.41  | 0.4449  |
| v29 | 920.6   | 3.1448  | 909.88  | 2.1671  |
| v30 | 938.41  | 0.1632  | 945.12  | 2.2114  |
| v31 | 987.51  | 5.2779  | 998.3   | 4.0047  |
| v32 | 1002.58 | 0.0042  | 1006.62 | 0.0843  |
| v33 | 1009.71 | 2.5031  | 1022.31 | 0.3919  |
| v34 | 1016.98 | 0.0008  | 1025.68 | 0.0141  |
| v35 | 1031.33 | 1.4365  | 1055.36 | 0.0529  |
| v36 | 1044.08 | 3.1255  | 1070.39 | 4.1637  |
| v37 | 1051.16 | 3.9153  | 1074.23 | 2.4058  |
| v38 | 1113.16 | 5.3986  | 1136.39 | 5.3561  |
| v39 | 1117.01 | 0.9894  | 1192.96 | 0.2179  |
| v40 | 1180.91 | 0.1026  | 1205.2  | 13.0356 |
| v41 | 1192.12 | 1.27    | 1234.45 | 0.0411  |
| v42 | 1216.85 | 3.4627  | 1254.04 | 1.3827  |
| v43 | 1260.05 | 6.7595  | 1294.79 | 3.1068  |
| v44 | 1302.5  | 0.1466  | 1328.85 | 0.0662  |
| v45 | 1355.08 | 0.0001  | 1347.65 | 0.5944  |
| v46 | 1474.99 | 2.3945  | 1380.95 | 0.9001  |
| v47 | 1503.05 | 17.1964 | 1457.56 | 0.3347  |
| v48 | 1598.45 | 3.3604  | 1505.61 | 5.7202  |
| v49 | 1618.75 | 3.7772  | 1551.77 | 23.9452 |
| v50 | 1621    | 10.6907 | 1595.11 | 2.2867  |

|       |            |         |            |         |
|-------|------------|---------|------------|---------|
| v51   | 1680.28    | 6.6876  | 1646.1     | 3.6597  |
| v52   | 1843.38    | 10.9552 | 1671.26    | 13.3801 |
| v53   | 2297.78    | 6.0041  | 2154.51    | 11.9013 |
| v54   | 2297.98    | 11.534  | 2205.83    | 9.0066  |
| v55   | 2326.69    | 15.125  | 2345.91    | 1.9371  |
| v56   | 2345.49    | 5.8637  | 2358.89    | 1.0762  |
| v57   | 2346.44    | 10.289  | 2373.27    | 17.686  |
| v58   | 2420.21    | 4.0262  | 2386.44    | 8.3531  |
| v59   | 3192.36    | 2.0393  | 3189.46    | 3.3516  |
| v60   | 3199.01    | 4.2558  | 3197.71    |         |
| v61   | 3212.06    | 8.0509  | 3211.89    | 20.0437 |
| v62   | 3217.49    | 17.3383 | 3219.62    | 20.9671 |
| v63   | 3223.83    | 10.6622 | 3225.18    | 5.8236  |
| <hr/> |            |         |            |         |
|       | <b>i21</b> |         | <b>i22</b> |         |
| v1    | 15.08      | 0.5373  | 44.61      | 0.0193  |
| v2    | 34.81      | 0.0047  | 75.46      | 0.6017  |
| v3    | 82.17      | 0       | 112.28     | 0.1958  |
| v4    | 98.21      | 1.4385  | 179.37     | 0.2567  |
| v5    | 178.36     | 0.0732  | 236.88     | 0.1076  |
| v6    | 291.22     | 0.0244  | 289.45     | 0.3569  |
| v7    | 313.38     | 0       | 314.18     | 1.583   |
| v8    | 337.57     | 5.3885  | 339.71     | 7.4528  |
| v9    | 413.82     | 5.3543  | 422.27     | 0.2327  |
| v10   | 415.65     | 0       | 456.41     | 6.0923  |
| v11   | 494.05     | 2.6846  | 488.17     | 6.7056  |
| v12   | 512.85     | 13.4463 | 518.91     | 20.0258 |
| v13   | 560.12     | 5.3042  | 597.26     | 5.5685  |
| v14   | 615.82     | 4.7037  | 634.57     | 0.4366  |
| v15   | 634.83     | 0.151   | 648.47     | 1.508   |
| v16   | 693.43     | 33.1753 | 668.46     | 5.6019  |
| v17   | 699.82     | 3.4276  | 690.92     | 1.3598  |
| v18   | 724.79     | 0       | 721.14     | 37.8337 |
| v19   | 734.7      | 9.0582  | 745.83     | 10.0083 |
| v20   | 763.19     | 0       | 760.02     | 3.9596  |
| v21   | 764.96     | 43.9688 | 773.74     | 7.6966  |
| v22   | 784.95     | 0.0984  | 780.61     | 2.382   |
| v23   | 785.79     | 2.2039  | 792.85     | 28.8698 |
| v24   | 841.12     | 0       | 810.71     | 4.2911  |
| v25   | 847.13     | 3.3165  | 827.99     | 3.5365  |

|     |         |         |         |         |
|-----|---------|---------|---------|---------|
| v26 | 860.55  | 9.5163  | 840.64  | 0.7162  |
| v27 | 893.73  | 1.0742  | 872.41  | 0.1487  |
| v28 | 904.53  | 0.0002  | 879.98  | 0.8996  |
| v29 | 908.93  | 3.143   | 932.56  | 10.376  |
| v30 | 915.53  | 0       | 946.56  | 2.2514  |
| v31 | 995.1   | 0.11    | 971.3   | 2.0497  |
| v32 | 997.57  | 1.5942  | 1010.31 | 0.003   |
| v33 | 999.05  | 0       | 1023.12 | 0.3614  |
| v34 | 1011.39 | 0.0088  | 1027.27 | 0.1498  |
| v35 | 1046.84 | 4.7806  | 1040.86 | 0.4127  |
| v36 | 1073.36 | 1.7963  | 1065.38 | 5.611   |
| v37 | 1096.35 | 0.5974  | 1079.71 | 5.5029  |
| v38 | 1112.01 | 5.1682  | 1124.03 | 6.148   |
| v39 | 1135.4  | 6.0933  | 1176.02 | 0.145   |
| v40 | 1141.9  | 0.6247  | 1188.37 | 0.1554  |
| v41 | 1177.97 | 0.326   | 1214.47 | 0.1512  |
| v42 | 1196.52 | 2.5306  | 1235.93 | 1.0057  |
| v43 | 1235.6  | 0.4005  | 1275.97 | 1.8535  |
| v44 | 1283.93 | 2.379   | 1320.53 | 0.9727  |
| v45 | 1301.86 | 0.6208  | 1339.91 | 0.5571  |
| v46 | 1353.05 | 0.0743  | 1369.63 | 0.3975  |
| v47 | 1472.63 | 1.3794  | 1466.33 | 1.7519  |
| v48 | 1503.12 | 22.7321 | 1495.04 | 6.0871  |
| v49 | 1591.41 | 3.7556  | 1515.81 | 3.3229  |
| v50 | 1615.18 | 9.5299  | 1543.62 | 19.7636 |
| v51 | 1670.04 | 22.0762 | 1640.84 | 1.4464  |
| v52 | 1930    | 0.372   | 1666.68 | 10.908  |
| v53 | 2218.5  | 21.9786 | 2220.85 | 3.4004  |
| v54 | 2221.07 | 0.6214  | 2282.14 | 4.2076  |
| v55 | 2282.61 | 0       | 2326.17 | 8.2393  |
| v56 | 2284.28 | 15.0339 | 2374.84 | 4.9971  |
| v57 | 2358.18 | 2.0725  | 2401.34 | 7.4062  |
| v58 | 2407.17 | 8.6575  | 2419.67 | 3.8002  |
| v59 | 3189.8  | 3.9866  | 3182.77 | 6.1562  |
| v60 | 3195.71 | 4.1632  | 3191.64 | 0.2203  |
| v61 | 3210.01 | 7.4096  | 3202.52 | 21.2213 |
| v62 | 3214.54 | 23.2544 | 3216.15 | 25.9143 |
| v63 | 3222.19 | 12.9242 | 3226.08 | 5.8709  |

---

**ts1i3**

**ts1i2**

---

|     |         |         |          |         |
|-----|---------|---------|----------|---------|
| v1  | -665.23 | 22.9311 | -1502.07 | 606.41  |
| v2  | 24.06   | 0.12    | 38       | 0.15    |
| v3  | 64.33   | 0.4478  | 41.62    | 0.2108  |
| v4  | 88.01   | 1.3454  | 67.71    | 1.3566  |
| v5  | 126.56  | 1.2041  | 121.23   | 0.3535  |
| v6  | 237.19  | 1.3119  | 128.73   | 0.3941  |
| v7  | 244.66  | 1.0863  | 183.94   | 1.2059  |
| v8  | 312.4   | 2.4936  | 236.19   | 1.1546  |
| v9  | 353.89  | 0.446   | 256.29   | 0.6581  |
| v10 | 418.27  | 0.0677  | 317.22   | 1.4135  |
| v11 | 421.9   | 3.0599  | 414.77   | 0.0104  |
| v12 | 463.58  | 3.3809  | 425.72   | 1.6421  |
| v13 | 486.5   | 27.881  | 447.86   | 12.8887 |
| v14 | 497.6   | 22.7422 | 484.15   | 7.8035  |
| v15 | 527.71  | 8.4365  | 512.06   | 5.1837  |
| v16 | 572.22  | 4.223   | 517.06   | 8.1235  |
| v17 | 639.64  | 2.8838  | 528.99   | 7.213   |
| v18 | 644.16  | 3.6153  | 594.26   | 2.3121  |
| v19 | 672.71  | 1.0467  | 641.73   | 0.1364  |
| v20 | 722.58  | 29.7008 | 684.92   | 6.8582  |
| v21 | 725.92  | 4.1655  | 711.78   | 44.7766 |
| v22 | 770.2   | 1.0547  | 713.01   | 17.7333 |
| v23 | 788.73  | 48.2543 | 734.23   | 9.3595  |
| v24 | 797.93  | 0.8352  | 753.45   | 19.3007 |
| v25 | 810.81  | 3.0342  | 763.26   | 3.0437  |
| v26 | 861.02  | 0.5311  | 777.82   | 50.2489 |
| v27 | 873.19  | 4.0302  | 803.85   | 2.894   |
| v28 | 877.67  | 0.0041  | 863      | 0.008   |
| v29 | 898.69  | 0.4082  | 921.04   | 0.9585  |
| v30 | 929.85  | 0.2077  | 936.32   | 3.8894  |
| v31 | 959.79  | 3.8277  | 949.37   | 1.7649  |
| v32 | 960.71  | 2.38    | 1005.84  | 0.0024  |
| v33 | 1014.79 | 0.0064  | 1015.21  | 4.7689  |
| v34 | 1028.68 | 0.1731  | 1017.77  | 3.1164  |
| v35 | 1032.61 | 0.0489  | 1023.75  | 0.0839  |
| v36 | 1063.84 | 2.4213  | 1027.23  | 2.4947  |
| v37 | 1068.07 | 4.6838  | 1060.29  | 1.4927  |
| v38 | 1106.48 | 0.8624  | 1088.71  | 3.6545  |
| v39 | 1113.84 | 6.2419  | 1115.29  | 5.4899  |

|       |               |         |               |         |
|-------|---------------|---------|---------------|---------|
| v40   | 1141.03       | 2.0815  | 1187.7        | 0.1804  |
| v41   | 1189.7        | 0.0273  | 1201.93       | 35.0864 |
| v42   | 1212.26       | 0.201   | 1211.22       | 2.1571  |
| v43   | 1256.82       | 0.3076  | 1279.14       | 5.8565  |
| v44   | 1278.11       | 1.5532  | 1311.99       | 0.3748  |
| v45   | 1317.94       | 0.4129  | 1342.61       | 53.5107 |
| v46   | 1360.54       | 0.7959  | 1361.84       | 0.0002  |
| v47   | 1492.55       | 6.1072  | 1452.41       | 31.2138 |
| v48   | 1543.22       | 20.6473 | 1488.55       | 3.6098  |
| v49   | 1598.65       | 8.006   | 1526.85       | 21.2009 |
| v50   | 1648.54       | 2.1093  | 1539.31       | 28.8417 |
| v51   | 1677.63       | 8.5908  | 1628.44       | 2.9119  |
| v52   | 2081.55       | 0.2807  | 1658.31       | 50.112  |
| v53   | 2206.95       | 14.2808 | 2141.31       | 18.9578 |
| v54   | 2281.52       | 11.8146 | 2294.19       | 5.0954  |
| v55   | 2282.7        | 0.3979  | 2333.29       | 15.4309 |
| v56   | 2320.63       | 3.1592  | 2336.34       | 0.9228  |
| v57   | 2366.81       | 8.1595  | 2351.02       | 5.9618  |
| v58   | 2406.3        | 3.0735  | 2424.11       | 4.1387  |
| v59   | 3191.31       | 1.2389  | 3191.87       | 7.0429  |
| v60   | 3199.38       | 2.8563  | 3198.61       | 2.7837  |
| v61   | 3209.45       | 13.7901 | 3210.91       | 6.3002  |
| v62   | 3216.66       | 18.0606 | 3216.01       | 20.6946 |
| v63   | 3223.03       | 9.5676  | 3223.51       | 18.3137 |
| <hr/> |               |         |               |         |
|       | <b>tsilp2</b> |         | <b>tsi3i4</b> |         |
| v1    | -571.56       | 11.503  | -1257.47      | 16.3036 |
| v2    | 11.57         | 0.1117  | 35.5          | 0.2118  |
| v3    | 41.05         | 0.3042  | 64.88         | 1.3183  |
| v4    | 72.32         | 1.4656  | 125.52        | 0.7371  |
| v5    | 113.65        | 0.0383  | 200.25        | 1.2677  |
| v6    | 121.84        | 0.4605  | 238.26        | 2.9621  |
| v7    | 180.12        | 0.6857  | 325.75        | 1.5471  |
| v8    | 196.01        | 4.4197  | 367.13        | 0.8503  |
| v9    | 257.26        | 6.4523  | 418.25        | 0.3802  |
| v10   | 260.93        | 4.5018  | 424.78        | 3.4922  |
| v11   | 349.25        | 3.1794  | 439.19        | 18.3402 |
| v12   | 359.8         | 3.4118  | 484.01        | 1.7765  |
| v13   | 416.31        | 0.0082  | 542.14        | 28.0585 |
| v14   | 423.79        | 6.8854  | 571.27        | 18.5089 |



|     |         |         |         |         |
|-----|---------|---------|---------|---------|
| v15 | 440.03  | 4.2417  | 602.19  | 2.0242  |
| v16 | 536.23  | 9.5504  | 638.71  | 0.4846  |
| v17 | 547.48  | 0.8664  | 679.06  | 37.2944 |
| v18 | 582.37  | 2.7244  | 708.3   | 5.9961  |
| v19 | 641.24  | 0.5824  | 715.27  | 38.2809 |
| v20 | 658.57  | 7.5576  | 740.71  | 3.3048  |
| v21 | 665.73  | 5.5123  | 777.64  | 10.2424 |
| v22 | 718.44  | 33.9237 | 785.25  | 22.6683 |
| v23 | 738.29  | 0.9794  | 815.21  | 11.1323 |
| v24 | 742.65  | 29.4835 | 835.66  | 4.1947  |
| v25 | 758.6   | 1.7374  | 860.44  | 1.8458  |
| v26 | 784.72  | 1.673   | 865.82  | 15.6307 |
| v27 | 791.43  | 40.7378 | 868.76  | 8.4459  |
| v28 | 833.8   | 2.268   | 885.66  | 6.5081  |
| v29 | 874.19  | 0.1012  | 911.37  | 4.564   |
| v30 | 874.3   | 0.3943  | 947.02  | 3.1236  |
| v31 | 937.54  | 0.4827  | 979.21  | 2.3062  |
| v32 | 958.81  | 3.3031  | 987.78  | 2.5071  |
| v33 | 969.79  | 0.0625  | 1009.22 | 0.475   |
| v34 | 1012.49 | 0.0079  | 1022.71 | 0.1695  |
| v35 | 1027.58 | 0.2511  | 1029    | 0.2601  |
| v36 | 1032.72 | 0.0531  | 1065.1  | 5.054   |
| v37 | 1058.51 | 3.5817  | 1082.92 | 1.5781  |
| v38 | 1064.12 | 6.0474  | 1121.78 | 11.4241 |
| v39 | 1096.94 | 5.5974  | 1150.73 | 8.0607  |
| v40 | 1114.76 | 5.5563  | 1188.26 | 0.0555  |
| v41 | 1190.81 | 0.0746  | 1210.76 | 2.8066  |
| v42 | 1212.16 | 0.5231  | 1217.41 | 0.0735  |
| v43 | 1237.6  | 1.788   | 1275.8  | 27.8384 |
| v44 | 1317.74 | 0.312   | 1323.82 | 3.1033  |
| v45 | 1331.61 | 17.6204 | 1346.52 | 20.8976 |
| v46 | 1361.82 | 0.4296  | 1365.22 | 3.6345  |
| v47 | 1492.76 | 5.4275  | 1443.11 | 61.7216 |
| v48 | 1531.69 | 7.2345  | 1496    | 14.7728 |
| v49 | 1558.44 | 32.3709 | 1538.57 | 16.8127 |
| v50 | 1602.4  | 1.4834  | 1567.86 | 1.1511  |
| v51 | 1646.45 | 1.5515  | 1639.87 | 10.7287 |
| v52 | 1678.99 | 9.281   | 1643.44 | 3.0129  |
| v53 | 2300.2  | 1.8299  | 1666.5  | 5.9133  |

|       |               |         |               |         |
|-------|---------------|---------|---------------|---------|
| v54   | 2336.68       | 1.3914  | 2191.51       | 10.8557 |
| v55   | 2344.97       | 3.787   | 2295.96       | 5.6233  |
| v56   | 2358.87       | 1.7528  | 2330.86       | 7.1565  |
| v57   | 2367.79       | 11.9249 | 2344.27       | 5.6453  |
| v58   | 2421.98       | 5.1675  | 2384.19       | 11.4844 |
| v59   | 3193.49       | 1.3229  | 3188.16       | 3.0263  |
| v60   | 3202.13       | 2.4527  | 3196.17       | 7.5951  |
| v61   | 3211.73       | 12.2354 | 3209.43       | 14.0081 |
| v62   | 3218.99       | 17.0256 | 3215.35       | 17.7187 |
| v63   | 3224.74       | 9.9469  | 3220.99       | 14.9091 |
| <hr/> |               |         |               |         |
|       | <b>tsi2i4</b> |         | <b>tsi2p2</b> |         |
| v1    | -355.01       | 1.934   | -593.85       | 10.1222 |
| v2    | 40.39         | 0.0493  | 17.46         | 0.1203  |
| v3    | 68.05         | 0.2733  | 38.63         | 0.744   |
| v4    | 76.24         | 0.4571  | 65.21         | 2.2995  |
| v5    | 179.76        | 0.8421  | 76.36         | 0.786   |
| v6    | 213.57        | 0.0846  | 110.39        | 0.0584  |
| v7    | 242.9         | 0.4796  | 128.33        | 1.4421  |
| v8    | 272.91        | 0.7245  | 217.9         | 0.1858  |
| v9    | 376.71        | 1.2388  | 260.84        | 0.9774  |
| v10   | 415.09        | 0.327   | 276.82        | 5.8781  |
| v11   | 424.53        | 5.3589  | 360.08        | 11.7574 |
| v12   | 471.51        | 11.7846 | 373.16        | 3.6384  |
| v13   | 495.41        | 10.448  | 416.07        | 0.1295  |
| v14   | 528.94        | 20.9415 | 422.09        | 11.1672 |
| v15   | 543.58        | 0.2358  | 436.53        | 3.7106  |
| v16   | 605.93        | 18.2049 | 535.94        | 5.8993  |
| v17   | 636.47        | 0.7864  | 554.87        | 2.4144  |
| v18   | 674.95        | 13.6672 | 586.92        | 1.6498  |
| v19   | 711.7         | 32.3609 | 640.7         | 0.7705  |
| v20   | 716.64        | 0.6841  | 661.14        | 15.2485 |
| v21   | 732.54        | 2.6978  | 669.32        | 5.4995  |
| v22   | 776.25        | 7.5871  | 716.88        | 33.3215 |
| v23   | 781.49        | 30.0386 | 732.43        | 1.4214  |
| v24   | 804.7         | 5.5245  | 748.27        | 31.401  |
| v25   | 818.56        | 3.4237  | 757.64        | 1.1539  |
| v26   | 852           | 0.4801  | 790.01        | 44.7445 |
| v27   | 856.74        | 0.4402  | 806.36        | 0.2049  |
| v28   | 862.94        | 0.0476  | 843.96        | 1.0471  |

|     |         |               |                |         |
|-----|---------|---------------|----------------|---------|
| v29 | 895.04  | 2.6654        | 873.62         | 0.0164  |
| v30 | 909.9   | 0.3787        | 880.14         | 1.0864  |
| v31 | 938.62  | 2.3792        | 941.43         | 1.1558  |
| v32 | 991.35  | 1.7662        | 958.23         | 3.1919  |
| v33 | 1006.32 | 0.0251        | 970.27         | 0.2358  |
| v34 | 1013.05 | 1.8045        | 1013.42        | 0.0039  |
| v35 | 1023.34 | 0.0314        | 1026.25        | 0.2391  |
| v36 | 1027.93 | 1.8423        | 1033.76        | 0.03    |
| v37 | 1058.75 | 3.5085        | 1057.78        | 2.5867  |
| v38 | 1107    | 2.2365        | 1063.31        | 5.25    |
| v39 | 1113.65 | 4.7545        | 1096.11        | 3.1503  |
| v40 | 1185.5  | 0.0691        | 1115.44        | 5.5878  |
| v41 | 1200.94 | 1.5388        | 1190.98        | 0.0948  |
| v42 | 1235.94 | 2.844         | 1211.58        | 0.7339  |
| v43 | 1305.59 | 0.6313        | 1234.47        | 2.5568  |
| v44 | 1313.47 | 2.1636        | 1317.87        | 0.4611  |
| v45 | 1357.48 | 0.2869        | 1328.74        | 8.3172  |
| v46 | 1483.57 | 4.692         | 1362.15        | 0.5146  |
| v47 | 1514.17 | 17.2701       | 1492.04        | 5.7123  |
| v48 | 1526.49 | 6.7516        | 1542.29        | 22.7945 |
| v49 | 1574.04 | 2.1059        | 1611.16        | 3.9639  |
| v50 | 1620.66 | 2.7983        | 1643.05        | 1.5909  |
| v51 | 1643.84 | 10.9215       | 1670.61        | 3.0674  |
| v52 | 1728.73 | 0.383         | 1679.23        | 1.8072  |
| v53 | 2274.3  | 7.3891        | 2246.94        | 9.8359  |
| v54 | 2300.03 | 3.2638        | 2301.43        | 2.1284  |
| v55 | 2331.52 | 1.1246        | 2340.32        | 1.3552  |
| v56 | 2344.44 | 8.249         | 2361.38        | 1.2965  |
| v57 | 2363.57 | 15.6651       | 2374.3         | 12.0551 |
| v58 | 2422.3  | 3.0256        | 2419.92        | 5.6518  |
| v59 | 3189.5  | 3.4247        | 3194.3         | 1.3293  |
| v60 | 3195.94 | 2.1882        | 3202.85        | 2.5572  |
| v61 | 3207.44 | 7.1278        | 3212.38        | 11.2534 |
| v62 | 3212.69 | 21.8797       | 3219.8         | 15.1359 |
| v63 | 3221.09 | 14.8027       | 3225.42        | 9.9892  |
|     |         | <b>tsi4p1</b> | <b>tsili21</b> |         |
| v1  | -695.96 | 1.4225        | -555.15        | 13.4504 |
| v2  | 63.25   | 0.1182        | 27.26          | 0.0204  |
| v3  | 87.82   | 1.1276        | 36.63          | 0.0391  |

|     |         |         |         |         |
|-----|---------|---------|---------|---------|
| v4  | 120.84  | 0.2368  | 48.17   | 0.6907  |
| v5  | 211.25  | 1.4085  | 87.28   | 1.4324  |
| v6  | 264.58  | 0.1208  | 173.96  | 0.8944  |
| v7  | 279.59  | 0.367   | 227.78  | 0.5762  |
| v8  | 314.51  | 0.328   | 280.31  | 3.2593  |
| v9  | 364.16  | 0.5135  | 319.19  | 1.6168  |
| v10 | 395.12  | 0.2144  | 373.85  | 4.416   |
| v11 | 422.56  | 0.1967  | 391.81  | 0.9024  |
| v12 | 473.8   | 10.3204 | 417.26  | 0.0059  |
| v13 | 534.12  | 3.6067  | 471.98  | 3.3327  |
| v14 | 587.29  | 32.4142 | 494.5   | 15.3266 |
| v15 | 608.64  | 0.8522  | 537.59  | 2.6682  |
| v16 | 614.63  | 4.9939  | 552.01  | 1.9226  |
| v17 | 638.64  | 0.0067  | 604.57  | 3.538   |
| v18 | 664.45  | 1.789   | 641.88  | 0.0157  |
| v19 | 696.76  | 0.1436  | 689.8   | 2.5243  |
| v20 | 726.61  | 39.6652 | 716.22  | 32.8135 |
| v21 | 736.21  | 0.1729  | 722.85  | 5.0973  |
| v22 | 772.37  | 20.9187 | 769.92  | 2.3792  |
| v23 | 810.4   | 5.3243  | 786.18  | 8.2631  |
| v24 | 817     | 6.3651  | 786.71  | 38.6378 |
| v25 | 843.32  | 2.0725  | 819.95  | 6.9161  |
| v26 | 853.21  | 4.9644  | 853.87  | 0.8055  |
| v27 | 859.31  | 0.772   | 859.06  | 1.3318  |
| v28 | 863.62  | 0.8805  | 870.32  | 0.011   |
| v29 | 875.78  | 0.0355  | 900.19  | 1.084   |
| v30 | 889.39  | 0.0962  | 912.33  | 0.4848  |
| v31 | 957.99  | 1.5874  | 924.01  | 1.8219  |
| v32 | 974.69  | 0.2445  | 949.85  | 3.644   |
| v33 | 1012.08 | 0.2034  | 1009.92 | 0.0054  |
| v34 | 1021.19 | 4.3689  | 1023.71 | 0.5826  |
| v35 | 1028.7  | 0.3066  | 1028.32 | 0.0543  |
| v36 | 1030.96 | 0.0427  | 1061.05 | 3.4652  |
| v37 | 1058.16 | 0.1593  | 1068.01 | 2.1847  |
| v38 | 1071.25 | 2.7021  | 1100.79 | 0.8757  |
| v39 | 1121.55 | 5.6769  | 1113.81 | 5.7385  |
| v40 | 1190.07 | 0.0072  | 1160.81 | 0.4954  |
| v41 | 1219.75 | 0.3237  | 1188.13 | 0.0003  |
| v42 | 1266.3  | 0.2953  | 1209.83 | 0.8778  |

|     |         |                 |                |         |
|-----|---------|-----------------|----------------|---------|
| v43 | 1299.51 | 1.6192          | 1258.43        | 1.2615  |
| v44 | 1318.14 | 0.2665          | 1305.39        | 15.4035 |
| v45 | 1353.65 | 2.4024          | 1314.49        | 0.0274  |
| v46 | 1371.05 | 0.2384          | 1360.35        | 0.143   |
| v47 | 1433.16 | 14.7873         | 1490.22        | 4.4594  |
| v48 | 1494.86 | 4.8072          | 1539.1         | 35.0831 |
| v49 | 1550.35 | 12.7288         | 1637.29        | 2.1837  |
| v50 | 1587.42 | 1.7805          | 1665.41        | 30.6216 |
| v51 | 1620.06 | 6.4896          | 1672.52        | 7.8257  |
| v52 | 1654.81 | 1.6597          | 2164.26        | 22.2614 |
| v53 | 1681.42 | 4.6409          | 2210.31        | 9.2336  |
| v54 | 2352.63 | 1.1018          | 2274.86        | 6.9789  |
| v55 | 2358.28 | 0.2623          | 2276.77        | 4.7266  |
| v56 | 2367.53 | 3.0276          | 2314.92        | 5.463   |
| v57 | 2377.78 | 10.2278         | 2378.43        | 10.935  |
| v58 | 2389.83 | 8.5311          | 2402.32        | 3.1966  |
| v59 | 3188.14 | 3.628           | 3191.33        | 2.5654  |
| v60 | 3193.3  | 0.0292          | 3199.22        | 3.3174  |
| v61 | 3202.59 | 9.3748          | 3210.41        | 12.0533 |
| v62 | 3210.13 | 24.0979         | 3216.79        | 19.7806 |
| v63 | 3220.18 | 14.3954         | 3222.98        | 10.6806 |
|     |         | <b>tsi21i22</b> | <b>tsi22p3</b> |         |
| v1  | -1724.5 | 29.2839         | -390.29        | 40.322  |
| v2  | 28.87   | 0.2058          | 49.4           | 0.3259  |
| v3  | 60.13   | 0.7303          | 77.38          | 0.3777  |
| v4  | 88.19   | 0.4618          | 102.01         | 0.0781  |
| v5  | 165.8   | 0.843           | 164.1          | 2.0276  |
| v6  | 244.9   | 0.3155          | 175.1          | 3.3718  |
| v7  | 319.73  | 1.5497          | 210.84         | 0.8064  |
| v8  | 357.35  | 3.7211          | 247.88         | 0.9828  |
| v9  | 389.8   | 7.0151          | 310.73         | 0.8745  |
| v10 | 417.5   | 2.3415          | 340.45         | 4.3924  |
| v11 | 422     | 3.6151          | 423.33         | 1.7405  |
| v12 | 522.7   | 15.9759         | 465.05         | 4.3756  |
| v13 | 552.52  | 1.0802          | 514.33         | 23.7543 |
| v14 | 626.27  | 23.3967         | 529.78         | 12.5316 |
| v15 | 641.25  | 18.6096         | 599.64         | 9.7243  |
| v16 | 668.42  | 6.7903          | 606.77         | 9.4336  |
| v17 | 718.8   | 23.4906         | 635.08         | 0.5418  |

|     |         |         |         |          |
|-----|---------|---------|---------|----------|
| v18 | 723.5   | 14.5949 | 670.03  | 9.3073   |
| v19 | 729.39  | 2.187   | 696.94  | 2.0052   |
| v20 | 735.5   | 4.5673  | 726.22  | 41.2429  |
| v21 | 755.13  | 5.9728  | 740.81  | 0.63     |
| v22 | 765.95  | 7.2466  | 752.39  | 10.2081  |
| v23 | 792.07  | 41.1628 | 758.38  | 1.2487   |
| v24 | 820.4   | 5.0727  | 779.17  | 17.2021  |
| v25 | 832.28  | 20.9242 | 804.37  | 4.3261   |
| v26 | 843.92  | 8.9485  | 811.8   | 5.572    |
| v27 | 873.04  | 0.3434  | 816.84  | 8.0087   |
| v28 | 882.71  | 0.7834  | 836.55  | 22.3167  |
| v29 | 895.77  | 1.9643  | 847.16  | 6.3894   |
| v30 | 930.23  | 3.3873  | 881.67  | 0.1766   |
| v31 | 952.25  | 4.9786  | 921.47  | 18.6753  |
| v32 | 989.8   | 1.1238  | 964.59  | 2.0395   |
| v33 | 1010.04 | 0.0952  | 1000.82 | 8.0617   |
| v34 | 1025.77 | 0.2283  | 1018.86 | 2.0787   |
| v35 | 1029.55 | 0.0706  | 1028.71 | 0.3512   |
| v36 | 1062.81 | 3.6137  | 1037.12 | 0.6415   |
| v37 | 1089.37 | 1.7704  | 1047.91 | 0.6245   |
| v38 | 1114    | 7.0632  | 1069.34 | 5.9615   |
| v39 | 1124.64 | 1.043   | 1122.95 | 6.3767   |
| v40 | 1188.92 | 0.1724  | 1191.31 | 0.1078   |
| v41 | 1197    | 0.8485  | 1218.66 | 2.3817   |
| v42 | 1210.76 | 0.5126  | 1238.92 | 3.8739   |
| v43 | 1222.94 | 1.502   | 1260.8  | 5.8781   |
| v44 | 1263.98 | 1.46    | 1318.16 | 11.7052  |
| v45 | 1287.24 | 1.4047  | 1332.47 | 6.4895   |
| v46 | 1319.9  | 4.2224  | 1367.84 | 0.9832   |
| v47 | 1361.26 | 1.0485  | 1460.21 | 87.7227  |
| v48 | 1491.12 | 7.9185  | 1495.69 | 8.763    |
| v49 | 1537.43 | 14.4428 | 1546.82 | 14.3751  |
| v50 | 1558.64 | 3.6462  | 1554.5  | 3.2673   |
| v51 | 1645.43 | 3.6151  | 1649.83 | 4.4131   |
| v52 | 1672.86 | 10.1096 | 1678.77 | 0.4083   |
| v53 | 1762.12 | 23.7866 | 1711.1  | 132.0213 |
| v54 | 2214.17 | 12.8432 | 2331.64 | 5.5827   |
| v55 | 2292.84 | 8.2113  | 2381.84 | 3.3974   |
| v56 | 2295.75 | 6.7365  | 2390.62 | 1.7796   |

|       |           |         |           |         |
|-------|-----------|---------|-----------|---------|
| v57   | 2362.83   | 2.0793  | 2420.49   | 3.9243  |
| v58   | 2405.28   | 9.2686  | 2433.31   | 3.6424  |
| v59   | 3187.65   | 2.6352  | 3187.8    | 3.0523  |
| v60   | 3194.59   | 0.327   | 3195.73   | 0.1858  |
| v61   | 3203.5    | 7.1345  | 3206.66   | 14.3321 |
| v62   | 3210.58   | 25.2463 | 3217.56   | 20.2378 |
| v63   | 3219.77   | 17.0643 | 3225.1    | 6.7937  |
| <hr/> |           |         |           |         |
|       | <b>p1</b> |         | <b>p2</b> |         |
| v1    | 68.09     | 0       | 15.29     | 0.0264  |
| v2    | 91.75     | 0.8104  | 40.25     | 0.2927  |
| v3    | 122.2     | 0.1113  | 75.48     | 1.6723  |
| v4    | 264.44    | 0.0456  | 110.64    | 0.0007  |
| v5    | 310.15    | 0.0005  | 121.17    | 0.5556  |
| v6    | 353.6     | 0.7628  | 209.21    | 0.0117  |
| v7    | 367.97    | 0.1218  | 261.58    | 3.8526  |
| v8    | 423.43    | 0.154   | 334.84    | 5.6272  |
| v9    | 470.03    | 14.5968 | 349.04    | 1.7417  |
| v10   | 532.38    | 5.111   | 416.6     | 0.1068  |
| v11   | 573.65    | 25.2802 | 418.97    | 3.5373  |
| v12   | 611.47    | 0.0075  | 423.36    | 4.792   |
| v13   | 616.39    | 6.118   | 544.63    | 12.4149 |
| v14   | 638.59    | 0.2126  | 546.1     | 0.5054  |
| v15   | 668.1     | 6.4831  | 590.06    | 0.515   |
| v16   | 682.48    | 0.1087  | 641       | 0.6465  |
| v17   | 728.02    | 41.0032 | 662.02    | 10.6353 |
| v18   | 738.11    | 0.005   | 669.15    | 4.05    |
| v19   | 775.63    | 26.4258 | 718.77    | 34.3061 |
| v20   | 818.61    | 5.7999  | 739.68    | 0.5552  |
| v21   | 823.82    | 0.2685  | 746.85    | 33.7889 |
| v22   | 847.56    | 2.4741  | 757.29    | 1.3425  |
| v23   | 856.24    | 5.1834  | 791.62    | 41.8814 |
| v24   | 864.45    | 1.645   | 805.61    | 0.1061  |
| v25   | 869.73    | 0.1005  | 843.56    | 0.7919  |
| v26   | 877.4     | 0.0225  | 874.65    | 0.0003  |
| v27   | 891.79    | 0.3248  | 881.23    | 0.4343  |
| v28   | 958.81    | 1.8428  | 940.54    | 0.8008  |
| v29   | 984.59    | 0.0167  | 958.73    | 3.6538  |
| v30   | 1012.88   | 0.2199  | 970.92    | 0.2248  |
| v31   | 1025.33   | 4.5435  | 1012.71   | 0.0093  |

|       |            |         |                |         |
|-------|------------|---------|----------------|---------|
| v32   | 1028.81    | 0.5096  | 1027.3         | 0.1723  |
| v33   | 1030.68    | 0.0638  | 1032.59        | 0.0645  |
| v34   | 1060.66    | 0.0991  | 1057.95        | 2.961   |
| v35   | 1071.98    | 2.5272  | 1063.92        | 5.5807  |
| v36   | 1120.89    | 5.559   | 1098.25        | 4.5003  |
| v37   | 1189.7     | 0.0088  | 1114.57        | 5.4953  |
| v38   | 1219.51    | 0.2578  | 1190.58        | 0.0643  |
| v39   | 1269.73    | 0.2678  | 1212.14        | 0.3372  |
| v40   | 1303.99    | 0.6794  | 1235.34        | 0.6683  |
| v41   | 1325.35    | 0.0839  | 1317.44        | 0.2677  |
| v42   | 1364.08    | 1.3438  | 1335.63        | 16.2949 |
| v43   | 1380.49    | 0.8267  | 1361.7         | 0.3598  |
| v44   | 1439.75    | 12.3924 | 1492.58        | 5.3577  |
| v45   | 1495.58    | 4.8894  | 1544.71        | 26.5461 |
| v46   | 1551.49    | 13.2442 | 1613.75        | 4.0412  |
| v47   | 1614.86    | 1.3944  | 1646.2         | 1.5176  |
| v48   | 1648.19    | 6.859   | 1672.12        | 0.9471  |
| v49   | 1656.46    | 1.3246  | 1684.9         | 11.4629 |
| v50   | 1682.22    | 6.1961  | 2300.68        | 1.7507  |
| v51   | 2349.71    | 1.9235  | 2333.04        | 1.5805  |
| v52   | 2356.56    | 0.1038  | 2343.17        | 0.7005  |
| v53   | 2367.7     | 4.3981  | 2358.79        | 1.3225  |
| v54   | 2376.7     | 14.4321 | 2369.72        | 12.87   |
| v55   | 2388.32    | 8.0611  | 2419.81        | 5.9624  |
| v56   | 3187.21    | 3.6481  | 3193.13        | 1.5077  |
| v57   | 3192.25    | 0.0494  | 3201.78        | 2.4315  |
| v58   | 3201.67    | 9.0622  | 3211.39        | 12.5355 |
| v59   | 3208.98    | 25.3174 | 3218.78        | 17.7071 |
| v60   | 3219.34    | 15.1773 | 3224.49        | 10.2096 |
| <hr/> |            |         |                |         |
|       | <b>p10</b> |         | <b>vdW(i1)</b> |         |
| v1    | 50.72      | 0.2485  | 10.19          | 1.4762  |
| v2    | 80.19      | 0.4826  | 27.02          | 1.7149  |
| v3    | 107.89     | 0.0442  | 36.48          | 0.5682  |
| v4    | 195.7      | 0.6375  | 53.37          | 0.2103  |
| v5    | 248.16     | 0.7056  | 59.42          | 1.4387  |
| v6    | 308.63     | 0.5814  | 103.54         | 3.3202  |
| v7    | 339.82     | 3.2306  | 127.34         | 15.9502 |
| v8    | 423.88     | 1.4844  | 147.43         | 4.2759  |
| v9    | 464.92     | 6.2685  | 158.75         | 0.204   |



|     |         |         |         |         |
|-----|---------|---------|---------|---------|
| v10 | 509.23  | 25.2888 | 254.63  | 1.2453  |
| v11 | 519.99  | 14.6622 | 283.38  | 51.9206 |
| v12 | 592.8   | 1.8402  | 390.65  | 0.0854  |
| v13 | 605.34  | 10.825  | 401.75  | 8.0398  |
| v14 | 635.4   | 0.5446  | 454.88  | 0.054   |
| v15 | 673.93  | 10.048  | 479.77  | 3.4414  |
| v16 | 696.04  | 1.743   | 495.47  | 32.5702 |
| v17 | 726.87  | 41.5027 | 511.88  | 0.5575  |
| v18 | 746.37  | 0.6752  | 628.82  | 0.3018  |
| v19 | 750.27  | 10.2066 | 630.88  | 0.2278  |
| v20 | 759.59  | 1.1374  | 690.36  | 50.3051 |
| v21 | 784.74  | 15.7108 | 737.83  | 0.5299  |
| v22 | 810.06  | 8.2674  | 751.26  | 0.0448  |
| v23 | 810.71  | 1.2616  | 758.17  | 74.6233 |
| v24 | 820.29  | 7.3423  | 761.61  | 5.0455  |
| v25 | 838.46  | 20.1637 | 788.96  | 1.4515  |
| v26 | 848.56  | 6.0202  | 797.59  | 31.8735 |
| v27 | 882.22  | 0.1646  | 811.97  | 0.2439  |
| v28 | 919.67  | 16.1107 | 851.96  | 0.8603  |
| v29 | 964.31  | 2.1518  | 864.78  | 1.1387  |
| v30 | 1000.85 | 6.5919  | 945.78  | 0.0057  |
| v31 | 1019.03 | 1.7034  | 977.62  | 3.4829  |
| v32 | 1028.86 | 0.3106  | 1019.31 | 5.6267  |
| v33 | 1037.19 | 0.6172  | 1020.81 | 0.9979  |
| v34 | 1048.03 | 0.5949  | 1028.81 | 5.4527  |
| v35 | 1070.05 | 5.4337  | 1041.66 | 0.1199  |
| v36 | 1123.06 | 6.1187  | 1053.64 | 0.4391  |
| v37 | 1191.08 | 0.0914  | 1068.03 | 1.3444  |
| v38 | 1219.32 | 1.58    | 1069.32 | 0.2103  |
| v39 | 1233.44 | 5.2407  | 1117.72 | 4.1109  |
| v40 | 1268.43 | 4.1973  | 1188.78 | 72.4313 |
| v41 | 1314.63 | 10.9336 | 1191.6  | 7.6914  |
| v42 | 1331.55 | 4.2767  | 1214.82 | 0.1122  |
| v43 | 1368.5  | 0.9204  | 1232.81 | 21.9023 |
| v44 | 1494.86 | 9.7664  | 1327.34 | 4.9528  |
| v45 | 1516.56 | 92.7225 | 1360.37 | 7.0008  |
| v46 | 1547.97 | 23.5024 | 1483.56 | 11.4869 |
| v47 | 1584.23 | 3.1267  | 1515.5  | 2.8156  |
| v48 | 1649.98 | 3.7357  | 1600.24 | 11.3248 |

|     |         |          |         |          |
|-----|---------|----------|---------|----------|
| v49 | 1679.1  | 0.8139   | 1614.8  | 0.546    |
| v50 | 1711.69 | 102.1696 | 1640.28 | 116.9044 |
| v51 | 2329.62 | 6.6257   | 1680.84 | 0.0793   |
| v52 | 2378.14 | 1.1605   | 1991.01 | 29.2883  |
| v53 | 2387.75 | 4.0942   | 2295.46 | 1.1271   |
| v54 | 2422.62 | 4.8313   | 2296.43 | 3.6357   |
| v55 | 2434.94 | 2.2025   | 2345.83 | 2.1307   |
| v56 | 3187.1  | 3.4925   | 2348.39 | 0.4197   |
| v57 | 3195.65 | 0.2877   | 2417.25 | 4.6731   |
| v58 | 3206.42 | 15.5967  | 2417.99 | 2.3277   |
| v59 | 3217.47 | 21.0812  | 3200.05 | 0.4906   |
| v60 | 3225.64 | 6.131    | 3213.28 | 3.7655   |
| v61 |         |          | 3220.47 | 6.4621   |
| v62 |         |          | 3230.71 | 4.7995   |
| v63 |         |          | 3237.34 | 3.0399   |

---

**tsi1vdW**

---

|     |        |         |
|-----|--------|---------|
| v1  | -23.09 | 1.2835  |
| v2  | 33.94  | 0.842   |
| v3  | 44.07  | 0.3849  |
| v4  | 60.55  | 0.2904  |
| v5  | 70.35  | 0.4433  |
| v6  | 93.68  | 12.2012 |
| v7  | 122.94 | 15.5821 |
| v8  | 148.73 | 4.2185  |
| v9  | 178.28 | 0.6267  |
| v10 | 258.75 | 37.9454 |
| v11 | 302.3  | 1.52    |
| v12 | 391.07 | 0.0838  |
| v13 | 477.53 | 2.6766  |
| v14 | 492.3  | 28.1083 |
| v15 | 512.62 | 0.7884  |
| v16 | 525.13 | 0.1025  |
| v17 | 546.2  | 15.3286 |
| v18 | 631.73 | 0.1974  |
| v19 | 693.28 | 51.072  |
| v20 | 788.08 | 0.3708  |
| v21 | 790.51 | 1.736   |
| v22 | 797.31 | 23.7382 |
| v23 | 867.21 | 1.0179  |

|     |         |         |
|-----|---------|---------|
| v24 | 907.7   | 0.0745  |
| v25 | 958.21  | 43.828  |
| v26 | 968.47  | 64.4388 |
| v27 | 977.98  | 0.2379  |
| v28 | 1013.24 | 1.1432  |
| v29 | 1019.64 | 4.0737  |
| v30 | 1020.54 | 1.4323  |
| v31 | 1021.44 | 0.2148  |
| v32 | 1042.22 | 0.1333  |
| v33 | 1054.07 | 0.5607  |
| v34 | 1067.51 | 44.0453 |
| v35 | 1115.67 | 4.3289  |
| v36 | 1185.38 | 71.4355 |
| v37 | 1191.28 | 2.4502  |
| v38 | 1229.54 | 21.4606 |
| v39 | 1236.97 | 0.0358  |
| v40 | 1326.39 | 4.0772  |
| v41 | 1327.18 | 0.6721  |
| v42 | 1331.57 | 2.2776  |
| v43 | 1358.32 | 6.6038  |
| v44 | 1425.43 | 7.9688  |
| v45 | 1481.27 | 0.3166  |
| v46 | 1483.93 | 11.2047 |
| v47 | 1514.77 | 1.9408  |
| v48 | 1617.15 | 0.9592  |
| v49 | 1640.84 | 83.3517 |
| v50 | 1681.24 | 13.8301 |
| v51 | 1743.98 | 2.8115  |
| v52 | 2017.03 | 19.5186 |
| v53 | 3149.12 | 0.8442  |
| v54 | 3152.2  | 13.6536 |
| v55 | 3159.71 | 0.9813  |
| v56 | 3165.62 | 4.055   |
| v57 | 3199.17 | 0.2373  |
| v58 | 3211.03 | 3.5741  |
| v59 | 3218.44 | 5.7683  |
| v60 | 3228.44 | 3.9278  |
| v61 | 3232.09 | 5.1173  |
| v62 | 3245.98 | 6.7786  |

| v63 | 3251.64    | 4.3981  |            |         |
|-----|------------|---------|------------|---------|
|     | <b>i28</b> |         | <b>i29</b> |         |
| v1  | 11.11      | 0.0055  | 29.46      | 0.6795  |
| v2  | 49.99      | 0.6379  | 50.91      | 0.5326  |
| v3  | 64.59      | 0.8905  | 59.64      | 0.1605  |
| v4  | 91.82      | 0.2156  | 95.85      | 0.335   |
| v5  | 112.93     | 0.6584  | 131.52     | 0.3138  |
| v6  | 139.69     | 0.2923  | 199.41     | 0.1703  |
| v7  | 167.88     | 0.8869  | 256.41     | 0.1906  |
| v8  | 254.08     | 1.7451  | 300.3      | 0.752   |
| v9  | 315.66     | 2.169   | 331.82     | 0.6155  |
| v10 | 360.33     | 3.5561  | 381.54     | 2.2954  |
| v11 | 361.21     | 0.6388  | 415.3      | 0.0064  |
| v12 | 417.12     | 8.0438  | 487.35     | 5.3204  |
| v13 | 417.6      | 7.5316  | 513.41     | 0.7374  |
| v14 | 522.19     | 13.4558 | 538.97     | 4.9409  |
| v15 | 531.47     | 0.7623  | 546.76     | 2.5809  |
| v16 | 545.08     | 5.5861  | 627.23     | 1.4684  |
| v17 | 584.6      | 18.7229 | 635.15     | 0.0041  |
| v18 | 590.13     | 3.5088  | 674.42     | 3.5057  |
| v19 | 643.61     | 0.0785  | 696.17     | 32.2314 |
| v20 | 673.34     | 0.9665  | 724.36     | 1.3392  |
| v21 | 720.4      | 34.4418 | 743        | 25.9765 |
| v22 | 738.98     | 0.1798  | 765.58     | 46.3462 |
| v23 | 748.7      | 23.8028 | 791.01     | 0.5237  |
| v24 | 787.81     | 5.4824  | 803.95     | 4.7303  |
| v25 | 792.01     | 39.7127 | 817.36     | 8.0337  |
| v26 | 845.65     | 1.4803  | 844.77     | 0.0908  |
| v27 | 869.57     | 0.3509  | 863.14     | 5.7215  |
| v28 | 876.23     | 0.0018  | 879.21     | 9.703   |
| v29 | 913.11     | 0.723   | 900.83     | 17.5957 |
| v30 | 945.7      | 0.4671  | 912.23     | 3.5066  |
| v31 | 959.69     | 3.4202  | 933.91     | 9.9388  |
| v32 | 1013.57    | 0.0026  | 946.48     | 22.8635 |
| v33 | 1025.39    | 4.6524  | 1000.93    | 0.0035  |
| v34 | 1028       | 0.1581  | 1003.32    | 3.0205  |
| v35 | 1032.68    | 0.0891  | 1013.47    | 0.0054  |
| v36 | 1045.68    | 0.3027  | 1024.12    | 1.8178  |
| v37 | 1063.76    | 3.0558  | 1049.22    | 5.3617  |
| v38 | 1094.51    | 7.0974  | 1072.98    | 6.2977  |

|     |         |         |         |         |
|-----|---------|---------|---------|---------|
| v39 | 1114.21 | 5.7499  | 1113.48 | 5.1015  |
| v40 | 1171.34 | 0.5343  | 1122.35 | 4.6575  |
| v41 | 1190.7  | 0.0376  | 1180.32 | 0.3871  |
| v42 | 1193.06 | 1.6449  | 1192.67 | 10.5437 |
| v43 | 1213.01 | 0.0321  | 1232.99 | 9.2867  |
| v44 | 1304.03 | 6.5196  | 1304.85 | 0.7555  |
| v45 | 1317.43 | 0.2623  | 1355.3  | 0.0495  |
| v46 | 1361.82 | 0.3464  | 1367.59 | 4.123   |
| v47 | 1493.11 | 5.3534  | 1476.03 | 1.6466  |
| v48 | 1546.66 | 24.6169 | 1510.89 | 33.8692 |
| v49 | 1647.89 | 1.7042  | 1596.1  | 3.8262  |
| v50 | 1662.74 | 12.8401 | 1620.03 | 10.3928 |
| v51 | 1679.65 | 8.4452  | 1661.12 | 18.2825 |
| v52 | 2228.26 | 5.7355  | 1984.37 | 25.5241 |
| v53 | 2288.11 | 6.278   | 2271.55 | 6.0214  |
| v54 | 2300.16 | 3.3711  | 2296.35 | 5.8456  |
| v55 | 2357.44 | 5.7555  | 2319.83 | 6.6216  |
| v56 | 2364.7  | 0.2016  | 2347.87 | 8.078   |
| v57 | 2421.03 | 3.9614  | 2403.73 | 2.5843  |
| v58 | 2445.57 | 3.208   | 2419.57 | 5.1552  |
| v59 | 3192.35 | 0.8993  | 3190.27 | 4.4563  |
| v60 | 3201.04 | 2.9881  | 3196.22 | 3.7302  |
| v61 | 3211.09 | 13.311  | 3209.95 | 8.0243  |
| v62 | 3218.15 | 18.0203 | 3214.96 | 21.5777 |
| v63 | 3223.87 | 8.3589  | 3222.51 | 12.4039 |

| tsi28i29     |                              |          | tsili29                      |          |
|--------------|------------------------------|----------|------------------------------|----------|
| Normal modes | Frequency(cm <sup>-1</sup> ) | IR Inten | Frequency(cm <sup>-1</sup> ) | IR Inten |
| v1           | -659.75                      | 43.8299  | -665.78                      | 16.3969  |
| v2           | 41.47                        | 0.0614   | 35.08                        | 0.2396   |
| v3           | 47.1                         | 0.4501   | 45.6                         | 0.1239   |
| v4           | 62.47                        | 1.1476   | 60.92                        | 0.7434   |
| v5           | 101.14                       | 0.2127   | 94.94                        | 0.9226   |
| v6           | 133.93                       | 0.2661   | 149.41                       | 0.6269   |
| v7           | 203.11                       | 0.1375   | 219.1                        | 0.4766   |
| v8           | 264.79                       | 0.6607   | 251.77                       | 0.2556   |
| v9           | 299.78                       | 0.2073   | 304.81                       | 4.1925   |
| v10          | 340.43                       | 1.6343   | 365.42                       | 2.5715   |
| v11          | 355.62                       | 1.6711   | 385.35                       | 4.5588   |
| v12          | 416.1                        | 0.0675   | 415.62                       | 0.0072   |

|     |         |         |         |         |
|-----|---------|---------|---------|---------|
| v13 | 422.45  | 1.3069  | 470.32  | 4.893   |
| v14 | 509.88  | 7.801   | 511.26  | 6.8717  |
| v15 | 520.55  | 1.6362  | 525.93  | 4.5774  |
| v16 | 542.21  | 5.7554  | 550.33  | 1.3866  |
| v17 | 556.81  | 6.2877  | 624.78  | 0.0842  |
| v18 | 603.7   | 5.9521  | 640.29  | 0.0095  |
| v19 | 641.7   | 0.1076  | 699.5   | 16.3136 |
| v20 | 682.99  | 2.2352  | 707.68  | 15.3025 |
| v21 | 712.36  | 27.0819 | 708.9   | 30.1584 |
| v22 | 714.24  | 6.8336  | 713.05  | 6.4456  |
| v23 | 745.94  | 24.306  | 776.44  | 45.7537 |
| v24 | 778.88  | 45.7307 | 795.03  | 2.978   |
| v25 | 792.31  | 6.0651  | 803.74  | 0.5969  |
| v26 | 836.89  | 3.0736  | 829.91  | 1.1553  |
| v27 | 862.52  | 1.9226  | 860.96  | 0.0308  |
| v28 | 864.39  | 0.0535  | 866.64  | 1.3987  |
| v29 | 898.08  | 2.5419  | 903.08  | 5.3904  |
| v30 | 938.13  | 3.5441  | 933.77  | 3.5693  |
| v31 | 954.94  | 3.7007  | 969.55  | 9.0407  |
| v32 | 1006.62 | 0.0019  | 995.42  | 0.3826  |
| v33 | 1016.24 | 1.4109  | 1005.66 | 0.0126  |
| v34 | 1020.95 | 0.7519  | 1017.71 | 4.0009  |
| v35 | 1023.45 | 0.0813  | 1021.66 | 0.0215  |
| v36 | 1026.86 | 3.032   | 1026.93 | 1.9408  |
| v37 | 1059.16 | 2.2477  | 1057.73 | 3.4496  |
| v38 | 1093.61 | 8.6114  | 1083.86 | 2.632   |
| v39 | 1114.5  | 5.7194  | 1114.52 | 5.7019  |
| v40 | 1134.66 | 3.9332  | 1146    | 5.1728  |
| v41 | 1187.25 | 0.0886  | 1186.04 | 0.1175  |
| v42 | 1206.31 | 6.7526  | 1205.26 | 7.769   |
| v43 | 1234.23 | 10.3875 | 1284.47 | 58.5834 |
| v44 | 1312.36 | 0.1493  | 1311.65 | 0.2804  |
| v45 | 1354.23 | 16.9988 | 1349.88 | 0.0933  |
| v46 | 1360.79 | 0.0824  | 1359.85 | 0.0172  |
| v47 | 1488.29 | 3.5121  | 1486.14 | 3.2728  |
| v48 | 1534.89 | 47.6309 | 1529.46 | 50.2461 |
| v49 | 1628.12 | 2.9418  | 1562.12 | 52.3914 |
| v50 | 1654.1  | 33.9778 | 1621.17 | 3.1169  |
| v51 | 1665.3  | 13.4486 | 1646    | 24.3597 |
| v52 | 2105.74 | 5.8413  | 2049.68 | 0.5879  |
| v53 | 2277.81 | 6.4837  | 2263.68 | 9.7136  |

|       |                |         |                        |         |
|-------|----------------|---------|------------------------|---------|
| v54   | 2299.39        | 4.9072  | 2301.93                | 7.4896  |
| v55   | 2302.34        | 1.8412  | 2347.76                | 3.4407  |
| v56   | 2356.55        | 6.6325  | 2369.74                | 0.6111  |
| v57   | 2420.88        | 3.9686  | 2375.53                | 3.9771  |
| v58   | 2467.99        | 0.9191  | 2421.58                | 4.5973  |
| v59   | 3190.84        | 3.8866  | 3191.06                | 4.3566  |
| v60   | 3198.05        | 3.1952  | 3198.31                | 3.8583  |
| v61   | 3209.99        | 10.0881 | 3210.71                | 10.0274 |
| v62   | 3215.67        | 21.2108 | 3216.52                | 19.9996 |
| v63   | 3222.56        | 11.8979 | 3222.97                | 12.4334 |
| <hr/> |                |         |                        |         |
|       | <b>tsi2p13</b> |         | <b>phenylacetylene</b> |         |
| v1    | -350.22        | 1.8063  | 142.92                 | 1.9037  |
| v2    | 8.55           | 0.0066  | 160.85                 | 1.3527  |
| v3    | 28.1           | 0.1398  | 372.4                  | 4.2595  |
| v4    | 36.13          | 0.0781  | 416.39                 | 0       |
| v5    | 83.18          | 0.8354  | 476.12                 | 0.2766  |
| v6    | 106.96         | 0.3743  | 544.54                 | 5.9699  |
| v7    | 151.09         | 1.0876  | 560.2                  | 3.5801  |
| v8    | 163.78         | 1.2552  | 642.29                 | 0.6642  |
| v9    | 195.27         | 0.5872  | 679.36                 | 48.9001 |
| v10   | 280.87         | 4.5789  | 712.67                 | 39.0525 |
| v11   | 377.49         | 10.8647 | 719.95                 | 32.8806 |
| v12   | 415.32         | 1.2916  | 783.04                 | 2.64    |
| v13   | 417.26         | 20.6053 | 792.81                 | 44.6391 |
| v14   | 470.52         | 2.392   | 876.79                 | 0       |
| v15   | 479.6          | 11.4155 | 962.18                 | 4.2375  |
| v16   | 500.61         | 16.2594 | 1014.34                | 0       |
| v17   | 513.37         | 13.4609 | 1028.61                | 0.0413  |
| v18   | 548.08         | 0.9814  | 1034.16                | 0.0917  |
| v19   | 582.78         | 3.5396  | 1063.69                | 4.2256  |
| v20   | 599.54         | 3.6704  | 1114.95                | 5.3244  |
| v21   | 643.36         | 0.1171  | 1191.08                | 0.1004  |
| v22   | 669.43         | 7.8059  | 1212.42                | 0.0066  |
| v23   | 716.78         | 35.2078 | 1235.54                | 0.7992  |
| v24   | 739.36         | 26.5581 | 1318.57                | 0.6276  |
| v25   | 751.74         | 4.9906  | 1362.58                | 0.3023  |
| v26   | 755.12         | 2.9881  | 1493.57                | 5.7146  |
| v27   | 780.27         | 2.3367  | 1543.52                | 16.7339 |
| v28   | 788.62         | 47.8907 | 1649.01                | 1.337   |
| v29   | 829.48         | 0.9634  | 1679.5                 | 1.9439  |

|     |         |         |         |         |
|-----|---------|---------|---------|---------|
| v30 | 872.62  | 0.1338  | 2244.95 | 7.0929  |
| v31 | 939.66  | 7.5502  | 3193.8  | 0.1726  |
| v32 | 955.78  | 5.9183  | 3203.3  | 3.2224  |
| v33 | 995.46  | 24.9293 | 3212.68 | 12.5455 |
| v34 | 1012.12 | 0.0272  | 3220.53 | 15.9511 |
| v35 | 1025.92 | 0.0364  | 3225.45 | 5.3923  |
| v36 | 1032.25 | 0.1148  | 3483    | 89.5538 |
| v37 | 1052.57 | 3.3858  |         |         |
| v38 | 1062.47 | 3.4009  |         |         |
| v39 | 1115.81 | 5.3827  |         |         |
| v40 | 1176.65 | 10.143  |         |         |
| v41 | 1190.63 | 0.0516  |         |         |
| v42 | 1209.61 | 0.1838  |         |         |
| v43 | 1230.36 | 1.3149  |         |         |
| v44 | 1318.5  | 0.1784  |         |         |
| v45 | 1362.67 | 0.3784  |         |         |
| v46 | 1492.68 | 5.5316  |         |         |
| v47 | 1539.22 | 17.4094 |         |         |
| v48 | 1595.51 | 8.5612  |         |         |
| v49 | 1643.61 | 1.6777  |         |         |
| v50 | 1662.92 | 5.9405  |         |         |
| v51 | 1672.31 | 4.5166  |         |         |
| v52 | 2007.71 | 1.7504  |         |         |
| v53 | 2257.92 | 5.2102  |         |         |
| v54 | 2301.13 | 2.5099  |         |         |
| v55 | 2370.11 | 0.8383  |         |         |
| v56 | 2406.87 | 0.0987  |         |         |
| v57 | 2417.79 | 5.9143  |         |         |
| v58 | 2656.66 | 40.4517 |         |         |
| v59 | 3193.7  | 1.0787  |         |         |
| v60 | 3201.97 | 2.3767  |         |         |
| v61 | 3211.46 | 12.2081 |         |         |
| v62 | 3218.84 | 15.6119 |         |         |
| v63 | 3224.89 | 7.6528  |         |         |

---

**p13**

---

|    |        |         |
|----|--------|---------|
| v1 | 149.02 | 0.0015  |
| v2 | 258.41 | 6.1799  |
| v3 | 416.97 | 28.8531 |
| v4 | 450.91 | 4.2926  |
| v5 | 579.54 | 6.1826  |



|     |         |         |
|-----|---------|---------|
| v6  | 634.65  | 6.1806  |
| v7  | 737.33  | 1.5349  |
| v8  | 743.2   | 31.8631 |
| v9  | 752.15  | 0.6931  |
| v10 | 828.38  | 1.6593  |
| v11 | 937.83  | 0.3845  |
| v12 | 993.97  | 0.7011  |
| v13 | 1050.79 | 4.5163  |
| v14 | 1172.71 | 0.1776  |
| v15 | 1596.91 | 6.9276  |
| v16 | 1660.22 | 3.2588  |
| v17 | 2250.26 | 4.9306  |
| v18 | 2301.43 | 2.8841  |
| v19 | 2362.57 | 1.7046  |
| v20 | 2420.51 | 5.2149  |
| v21 | 2434    | 0.8111  |

---



|     |         |         |         |         |
|-----|---------|---------|---------|---------|
| v1  | 7.08    | 0.0474  | 29.29   | 0.0254  |
| v2  | 19.93   | 0.0237  | 80.45   | 0.232   |
| v3  | 42.05   | 0.479   | 131.19  | 0.5287  |
| v4  | 91.61   | 2.2701  | 146.67  | 2.8583  |
| v5  | 131.64  | 0.6042  | 173.11  | 1.266   |
| v6  | 160.26  | 0.0416  | 239.14  | 0.12    |
| v7  | 190.08  | 2.494   | 267.6   | 6.748   |
| v8  | 200.99  | 0.156   | 281.41  | 0.035   |
| v9  | 267.24  | 2.8944  | 335.84  | 0.4229  |
| v10 | 331.32  | 2.2126  | 418.54  | 0.0001  |
| v11 | 401     | 0.1018  | 431.35  | 1.2056  |
| v12 | 417.53  | 0.0021  | 444.36  | 2.1505  |
| v13 | 435.31  | 1.0361  | 468.51  | 1.9693  |
| v14 | 485.16  | 10.688  | 497.81  | 1.0981  |
| v15 | 503.33  | 1.5179  | 572.69  | 8.0512  |
| v16 | 538.19  | 3.7393  | 589.73  | 5.7033  |
| v17 | 554.73  | 5.289   | 639.76  | 0.0362  |
| v18 | 576.44  | 0.8018  | 705.4   | 1.5452  |
| v19 | 581.57  | 4.3518  | 720.87  | 32.4971 |
| v20 | 643.57  | 0.0084  | 786.09  | 46.0853 |
| v21 | 693.5   | 3.1966  | 809.68  | 0.1437  |
| v22 | 720.83  | 34.9683 | 819.97  | 1.1725  |
| v23 | 744.17  | 2.2773  | 872.57  | 0.0612  |
| v24 | 792.33  | 39.3148 | 903.22  | 0.862   |
| v25 | 809.13  | 46.9027 | 942.36  | 0.0825  |
| v26 | 867.67  | 0.5899  | 961.31  | 0.953   |
| v27 | 876.93  | 0.0001  | 971.55  | 10.3245 |
| v28 | 918.92  | 3.2043  | 983.11  | 1.2526  |
| v29 | 959.72  | 3.7188  | 998.34  | 2.2772  |
| v30 | 987.09  | 1.6729  | 1010.53 | 0.0178  |
| v31 | 1009.29 | 2.0961  | 1028.26 | 0.071   |
| v32 | 1013.77 | 0.0006  | 1029.07 | 0.0473  |
| v33 | 1026.86 | 0.7747  | 1068.73 | 4.1677  |
| v34 | 1028.64 | 0.5379  | 1071.13 | 4.4458  |
| v35 | 1032.52 | 0.0724  | 1074.84 | 1.1334  |
| v36 | 1062.25 | 0.1998  | 1088.24 | 1.7795  |
| v37 | 1066.91 | 4.2024  | 1129.87 | 4.5253  |
| v38 | 1113.93 | 5.6364  | 1177.22 | 2.3554  |
| v39 | 1130.26 | 21.1556 | 1190.43 | 0.1415  |

|     |         |         |         |         |
|-----|---------|---------|---------|---------|
| v40 | 1190.2  | 0.0281  | 1209.23 | 0.3152  |
| v41 | 1212.7  | 0.2244  | 1222.78 | 0.5402  |
| v42 | 1226.52 | 0.3099  | 1242.85 | 0.4488  |
| v43 | 1264.15 | 6.668   | 1287.49 | 0.1785  |
| v44 | 1290.14 | 1.1593  | 1312.43 | 1.615   |
| v45 | 1317.01 | 0.2093  | 1329.9  | 0.556   |
| v46 | 1339.23 | 27.6842 | 1351.1  | 5.4832  |
| v47 | 1361.69 | 0.269   | 1372.32 | 1.1091  |
| v48 | 1393.3  | 1.4163  | 1404.2  | 0.873   |
| v49 | 1431.53 | 3.1376  | 1424.93 | 4.7139  |
| v50 | 1448.35 | 8.5392  | 1477.57 | 3.674   |
| v51 | 1468.14 | 5.701   | 1479.89 | 1.9619  |
| v52 | 1492.84 | 5.0332  | 1486.75 | 9.1039  |
| v53 | 1497.23 | 9.8996  | 1496.16 | 7.1651  |
| v54 | 1505.45 | 18.9003 | 1497.97 | 12.0007 |
| v55 | 1534.93 | 8.7431  | 1550.29 | 20.3118 |
| v56 | 1547.64 | 27.0307 | 1653.19 | 3.058   |
| v57 | 1648.03 | 1.5958  | 1681.35 | 13.3368 |
| v58 | 1680.23 | 10.9146 | 1752.98 | 15.7566 |
| v59 | 2380.7  | 6.8552  | 1780.2  | 0.7831  |
| v60 | 3006.46 | 18.0124 | 3009.86 | 27.542  |
| v61 | 3030.48 | 7.1398  | 3026.56 | 39.705  |
| v62 | 3047.34 | 18.5969 | 3035.51 | 36.3494 |
| v63 | 3105.9  | 15.4374 | 3035.62 | 13.8108 |
| v64 | 3142.76 | 21.2172 | 3049.35 | 9.9582  |
| v65 | 3159.58 | 9.1681  | 3090.58 | 19.6754 |
| v66 | 3191.87 | 0.9527  | 3135.29 | 19.6793 |
| v67 | 3197.52 | 7.2681  | 3166.95 | 30.8076 |
| v68 | 3200.68 | 3.07    | 3184.55 | 3.3228  |
| v69 | 3210.77 | 14.3205 | 3192.2  | 0.4179  |
| v70 | 3217.93 | 18.9978 | 3202.06 | 14.0205 |
| v71 | 3223.59 | 8.4642  | 3212.95 | 26.8665 |
| v72 | 3256.1  | 10.715  | 3220.7  | 11.3609 |

---

|    | <b>i6</b> |        | <b>i8</b> |        |
|----|-----------|--------|-----------|--------|
| v1 | 30.11     | 0.2534 | 32        | 0.1009 |
| v2 | 40.87     | 0.1503 | 84        | 0.1803 |
| v3 | 51.8      | 0.4781 | 143.5     | 0.1114 |
| v4 | 84.09     | 0.3673 | 146.93    | 0.2138 |
| v5 | 146.91    | 0.434  | 172.41    | 0.9652 |

|     |         |         |         |         |
|-----|---------|---------|---------|---------|
| v6  | 183.73  | 0.5103  | 231.17  | 0.7726  |
| v7  | 223.24  | 0.3328  | 292.28  | 1.0886  |
| v8  | 241.59  | 0.9431  | 328.31  | 4.1015  |
| v9  | 261.19  | 2.4757  | 342.28  | 1.037   |
| v10 | 341.2   | 1.0715  | 418.23  | 0.0249  |
| v11 | 408.28  | 6.4331  | 434.87  | 0.2088  |
| v12 | 415.78  | 0.4343  | 473.65  | 0.8744  |
| v13 | 446.62  | 4.7683  | 509.46  | 0.0829  |
| v14 | 483.14  | 4.4737  | 536.04  | 3.7429  |
| v15 | 506.39  | 18.3323 | 562.71  | 1.4007  |
| v16 | 516.38  | 2.6964  | 610.47  | 1.3816  |
| v17 | 587.27  | 4.5579  | 638.92  | 0.0784  |
| v18 | 632.48  | 0.3209  | 714.31  | 21.9178 |
| v19 | 693.66  | 8.7959  | 723.45  | 6.4561  |
| v20 | 695.96  | 32.6109 | 741.15  | 74.2962 |
| v21 | 717.68  | 2.7874  | 789.83  | 19.3012 |
| v22 | 766.93  | 46.6356 | 838.54  | 2.1543  |
| v23 | 782.28  | 16.5223 | 861.77  | 0.1077  |
| v24 | 803.31  | 5.4851  | 897.44  | 0.2243  |
| v25 | 838.94  | 16.601  | 929.44  | 0.8329  |
| v26 | 845.2   | 0.3824  | 932.84  | 0.07    |
| v27 | 874.99  | 5.316   | 951.19  | 0.6464  |
| v28 | 915.8   | 4.0501  | 957.13  | 9.288   |
| v29 | 946.96  | 41.1988 | 1005.63 | 0.1141  |
| v30 | 951.76  | 3.9217  | 1008.66 | 0.3785  |
| v31 | 994.59  | 0.9581  | 1021.18 | 1.4337  |
| v32 | 1002.22 | 0.0373  | 1025.18 | 0.0312  |
| v33 | 1015.47 | 0.0215  | 1027.47 | 0.5848  |
| v34 | 1018.76 | 0.0661  | 1061.69 | 1.7577  |
| v35 | 1030.56 | 2.9687  | 1068    | 8.3281  |
| v36 | 1048.17 | 2.5944  | 1084.29 | 3.7459  |
| v37 | 1052.76 | 9.6055  | 1123.65 | 4.1786  |
| v38 | 1078.61 | 1.2151  | 1138.88 | 4.9948  |
| v39 | 1114.15 | 4.8931  | 1190.23 | 0.6228  |
| v40 | 1153.54 | 17.7394 | 1203.68 | 1.2984  |
| v41 | 1179.63 | 0.2206  | 1222.5  | 0.2352  |
| v42 | 1216.53 | 5.8298  | 1231.86 | 1.3947  |
| v43 | 1277.02 | 2.3784  | 1282.87 | 15.7324 |
| v44 | 1302.95 | 0.5328  | 1302.77 | 2.5917  |

|     |         |         |         |         |
|-----|---------|---------|---------|---------|
| v45 | 1352.17 | 7.38    | 1327.2  | 1.2984  |
| v46 | 1355.13 | 0.4465  | 1344.51 | 0.4827  |
| v47 | 1377.83 | 1.756   | 1373.21 | 1.125   |
| v48 | 1414.61 | 0.3423  | 1404    | 1.0057  |
| v49 | 1440.38 | 7.3402  | 1422.39 | 0.7705  |
| v50 | 1471.7  | 1.3973  | 1450.18 | 5.0323  |
| v51 | 1474.51 | 2.6919  | 1456.41 | 10.1036 |
| v52 | 1486.51 | 8.0192  | 1483.23 | 9.1133  |
| v53 | 1504.87 | 32.3035 | 1490.63 | 6.3562  |
| v54 | 1507.18 | 15.5103 | 1497.73 | 8.6088  |
| v55 | 1595.31 | 3.7948  | 1542.19 | 16.3033 |
| v56 | 1618.3  | 3.4551  | 1553.19 | 11.366  |
| v57 | 1686.63 | 12.775  | 1644.16 | 4.6878  |
| v58 | 1727.5  | 5.7495  | 1655.54 | 26.8789 |
| v59 | 1886.16 | 5.7021  | 1671.62 | 10.0619 |
| v60 | 3053    | 20.4302 | 2940.81 | 25.803  |
| v61 | 3059.14 | 12.414  | 2980.91 | 21.3078 |
| v62 | 3130.83 | 8.3656  | 3026.01 | 46.8701 |
| v63 | 3139.28 | 20.0091 | 3076.4  | 20.4368 |
| v64 | 3144.19 | 3.1171  | 3133.16 | 18.1464 |
| v65 | 3155.63 | 6.4749  | 3180.84 | 21.9482 |
| v66 | 3168.29 | 36.8685 | 3188.61 | 5.7241  |
| v67 | 3191.61 | 3.055   | 3195.69 | 7.6917  |
| v68 | 3197.78 | 4.5107  | 3200.9  | 11.8496 |
| v69 | 3212.03 | 7.7001  | 3212.43 | 9.3983  |
| v70 | 3216.78 | 18.1925 | 3217.7  | 11.8704 |
| v71 | 3223.5  | 11.6785 | 3222.04 | 32.4875 |
| v72 | 3242.19 | 11.2392 | 3224.73 | 7.3817  |

|     | <b>i23</b> |        | <b>i24</b> |        |
|-----|------------|--------|------------|--------|
| v1  | 24.03      | 0.5087 | 37.34      | 0.1626 |
| v2  | 26.45      | 0.0107 | 69.59      | 0.3865 |
| v3  | 81.55      | 0.0045 | 117.89     | 0.0599 |
| v4  | 101.97     | 1.2624 | 124.63     | 0.1619 |
| v5  | 173.96     | 0.073  | 166.48     | 0.0523 |
| v6  | 179.13     | 0.5888 | 235.52     | 0.2121 |
| v7  | 238.09     | 2.9021 | 283.24     | 4.4193 |
| v8  | 272.53     | 0.0981 | 299.63     | 0.8348 |
| v9  | 313.31     | 0.1478 | 303.78     | 0.0965 |
| v10 | 382.16     | 5.9349 | 380.45     | 0.3377 |

|     |         |         |         |         |
|-----|---------|---------|---------|---------|
| v11 | 415.68  | 0.0001  | 419.77  | 0.1102  |
| v12 | 435.03  | 2.0432  | 466.08  | 1.8211  |
| v13 | 446.38  | 7.9693  | 519.65  | 16.785  |
| v14 | 501.32  | 0.907   | 566.08  | 7.7286  |
| v15 | 565.28  | 0.0004  | 604.61  | 2.6077  |
| v16 | 585.45  | 1.5454  | 634.27  | 0.0994  |
| v17 | 635.4   | 0.0067  | 649.52  | 12.5799 |
| v18 | 660.29  | 4.8409  | 710.8   | 42.6894 |
| v19 | 693.33  | 33.1231 | 723.73  | 0.0652  |
| v20 | 764.8   | 44.4302 | 743.9   | 7.8021  |
| v21 | 786.37  | 0.6019  | 770.6   | 27.6889 |
| v22 | 817.09  | 12.1673 | 804.64  | 0.7188  |
| v23 | 840.73  | 0.0062  | 836.4   | 0.558   |
| v24 | 880.02  | 6.5501  | 853.98  | 4.7365  |
| v25 | 901.09  | 2.45    | 868.69  | 24.7193 |
| v26 | 908.58  | 3.1399  | 907.75  | 2.8047  |
| v27 | 923.59  | 0.2728  | 936.79  | 1.946   |
| v28 | 969.95  | 3.2536  | 944.38  | 6.0986  |
| v29 | 993.85  | 8.9163  | 968.32  | 18.5124 |
| v30 | 999.07  | 0.0156  | 980.26  | 4.6135  |
| v31 | 999.85  | 1.135   | 1003.26 | 0.2223  |
| v32 | 1011.18 | 0.0139  | 1020.37 | 0.9286  |
| v33 | 1044.57 | 8.1996  | 1022.25 | 0.0227  |
| v34 | 1046.94 | 4.9381  | 1033.22 | 7.0133  |
| v35 | 1069.83 | 0.2245  | 1065.99 | 5.0282  |
| v36 | 1106.81 | 2.3019  | 1070.07 | 1.6627  |
| v37 | 1112.08 | 5.2185  | 1124.93 | 5.7154  |
| v38 | 1173.45 | 0.0926  | 1167.63 | 0.6076  |
| v39 | 1178.1  | 0.348   | 1169.36 | 0.037   |
| v40 | 1185.34 | 0.6134  | 1188.62 | 0.6291  |
| v41 | 1194.75 | 0.7266  | 1206.89 | 1.1327  |
| v42 | 1201.4  | 8.5685  | 1226.16 | 0.0379  |
| v43 | 1249.64 | 0.2023  | 1242.1  | 2.2094  |
| v44 | 1296.48 | 3.4766  | 1279.56 | 4.6387  |
| v45 | 1301.81 | 0.6618  | 1316.74 | 0.3786  |
| v46 | 1333.46 | 8.6263  | 1350.52 | 1.1681  |
| v47 | 1353.26 | 0.0836  | 1360.14 | 1.0691  |
| v48 | 1363.25 | 0.7266  | 1378.22 | 1.2508  |
| v49 | 1425.66 | 4.3638  | 1412.6  | 0.2328  |

|     |         |         |         |         |
|-----|---------|---------|---------|---------|
| v50 | 1472.84 | 1.2772  | 1425.08 | 0.9938  |
| v51 | 1476.58 | 4.0846  | 1453.82 | 6.1054  |
| v52 | 1485.21 | 1.6584  | 1477.22 | 1.5425  |
| v53 | 1486.19 | 8.7317  | 1490.7  | 7.1769  |
| v54 | 1495.76 | 10.3325 | 1499.31 | 13.4176 |
| v55 | 1503.51 | 24.6016 | 1532.72 | 2.7977  |
| v56 | 1591.12 | 3.775   | 1541.64 | 26.436  |
| v57 | 1615.77 | 10.5194 | 1630.67 | 29.976  |
| v58 | 1759.29 | 10.1232 | 1638.41 | 1.7242  |
| v59 | 1932.62 | 0.5823  | 1663.06 | 11.033  |
| v60 | 3036.86 | 21.8151 | 3045.29 | 6.9043  |
| v61 | 3041.4  | 55.2633 | 3049.05 | 38.3856 |
| v62 | 3048.06 | 21.5349 | 3079.92 | 5.9741  |
| v63 | 3071.36 | 13.1094 | 3109.97 | 14.7896 |
| v64 | 3077.43 | 12.7192 | 3136.61 | 16.5138 |
| v65 | 3092.55 | 17.7573 | 3156.77 | 11.8274 |
| v66 | 3132.33 | 24.0286 | 3183.91 | 7.1953  |
| v67 | 3189.4  | 4.6941  | 3193.09 | 0.0918  |
| v68 | 3195.06 | 4.1946  | 3203.53 | 24.7402 |
| v69 | 3201.18 | 23.9706 | 3212.14 | 11.4721 |
| v70 | 3209.84 | 6.7019  | 3217.91 | 25.3838 |
| v71 | 3213.97 | 23.5128 | 3227.28 | 6.6983  |
| v72 | 3222.13 | 13.9168 | 3257.81 | 4.1333  |

|     | <b>i9</b> |        | <b>i11</b> |        |
|-----|-----------|--------|------------|--------|
| v1  | 7.74      | 0.0296 | 28.33      | 0.0428 |
| v2  | 39.5      | 0.5027 | 58.33      | 0.1613 |
| v3  | 41.36     | 0.6089 | 127.54     | 0.5294 |
| v4  | 58.2      | 0.0271 | 138.21     | 2.4117 |
| v5  | 108.46    | 2.0126 | 178.87     | 1.5319 |
| v6  | 131.98    | 0.4995 | 243.6      | 5.7433 |
| v7  | 204.92    | 1.794  | 278.09     | 1.2718 |
| v8  | 263.84    | 0.8278 | 280.78     | 0.026  |
| v9  | 286.61    | 2.2559 | 322.25     | 0.7664 |
| v10 | 300.25    | 0.8363 | 417.93     | 0.0269 |
| v11 | 340.73    | 2.4678 | 431.03     | 1.4912 |
| v12 | 356.66    | 1.3038 | 432.4      | 0.104  |
| v13 | 417.52    | 0.0058 | 452.24     | 3.833  |
| v14 | 419.42    | 0.1299 | 539.46     | 1.3615 |
| v15 | 503.66    | 1.8702 | 566.66     | 5.2427 |



|     |         |         |         |         |
|-----|---------|---------|---------|---------|
| v16 | 548.63  | 1.123   | 591.77  | 0.813   |
| v17 | 559.29  | 5.5916  | 640.89  | 0.0605  |
| v18 | 587.25  | 1.551   | 708.71  | 4.5964  |
| v19 | 620.2   | 2.8821  | 719.92  | 33.9942 |
| v20 | 643.04  | 0.0355  | 763.43  | 0.279   |
| v21 | 720.58  | 34.7623 | 785.18  | 44.9245 |
| v22 | 749.89  | 2.7898  | 826.21  | 0.871   |
| v23 | 786.56  | 0.9074  | 871.58  | 0.0482  |
| v24 | 792.23  | 39.006  | 916.47  | 1.238   |
| v25 | 808.63  | 44.5865 | 946.27  | 0.008   |
| v26 | 876.07  | 0.0036  | 959.65  | 8.8461  |
| v27 | 886.14  | 0.5685  | 970.05  | 3.6147  |
| v28 | 959.92  | 3.5351  | 980.32  | 1.7076  |
| v29 | 984.72  | 1.1543  | 988.65  | 3.0387  |
| v30 | 1002.04 | 10.0491 | 1009.6  | 0.0192  |
| v31 | 1013.35 | 0.0153  | 1028.03 | 0.0611  |
| v32 | 1017.67 | 0.9408  | 1028.04 | 0.0483  |
| v33 | 1027.95 | 0.1347  | 1067.08 | 4.9415  |
| v34 | 1029.64 | 0.2783  | 1071.46 | 9.102   |
| v35 | 1032.69 | 0.0772  | 1076.91 | 0.8288  |
| v36 | 1055.42 | 0.4848  | 1100.17 | 0.0389  |
| v37 | 1067.66 | 3.9764  | 1129.5  | 5.9983  |
| v38 | 1113.87 | 5.5785  | 1180.06 | 7.6344  |
| v39 | 1189.99 | 0.0431  | 1189.2  | 0.0615  |
| v40 | 1212.19 | 0.6434  | 1215.62 | 0.8283  |
| v41 | 1216.3  | 14.0137 | 1219.13 | 0.584   |
| v42 | 1235.1  | 0.5484  | 1227.43 | 0.2953  |
| v43 | 1248.42 | 4.7963  | 1283.99 | 1.3934  |
| v44 | 1283.69 | 0.2298  | 1318.79 | 2.1678  |
| v45 | 1317.13 | 0.236   | 1339.12 | 0.3745  |
| v46 | 1327.95 | 8.0716  | 1357.81 | 0.4735  |
| v47 | 1361.48 | 0.3079  | 1374.31 | 2.1019  |
| v48 | 1400    | 4.4541  | 1376.44 | 0.8255  |
| v49 | 1423.06 | 3.458   | 1423.73 | 3.016   |
| v50 | 1457.16 | 32.5999 | 1474.88 | 1.7287  |
| v51 | 1478.23 | 5.9934  | 1481.21 | 2.2041  |
| v52 | 1488.14 | 7.7102  | 1484.63 | 8.7972  |
| v53 | 1492.92 | 5.2908  | 1495.75 | 9.3202  |
| v54 | 1511.89 | 16.9434 | 1498.4  | 5.5509  |

|     |         |         |         |         |
|-----|---------|---------|---------|---------|
| v55 | 1538.98 | 1.3827  | 1547.41 | 21.7583 |
| v56 | 1547.11 | 23.9158 | 1652.52 | 3.2235  |
| v57 | 1648.01 | 1.6003  | 1680.71 | 13.5724 |
| v58 | 1680.16 | 9.1987  | 1756.11 | 11.2491 |
| v59 | 2379.89 | 1.2842  | 1785.2  | 1.5049  |
| v60 | 3007.95 | 23.9811 | 3018.29 | 4.5308  |
| v61 | 3029.77 | 6.9671  | 3019.39 | 66.7421 |
| v62 | 3030.58 | 29.152  | 3035.41 | 44.4679 |
| v63 | 3083.86 | 14.64   | 3042.26 | 15.1406 |
| v64 | 3124.05 | 18.0615 | 3044.17 | 9.169   |
| v65 | 3165.61 | 12.5068 | 3090.9  | 19.7227 |
| v66 | 3175.81 | 1.6735  | 3132.76 | 17.7269 |
| v67 | 3192.28 | 0.9311  | 3163.75 | 27.4993 |
| v68 | 3200.89 | 2.9972  | 3185.46 | 3.1716  |
| v69 | 3211.02 | 13.575  | 3192.69 | 0.4754  |
| v70 | 3217.97 | 18.242  | 3202.46 | 13.1594 |
| v71 | 3223.76 | 8.4254  | 3212.06 | 26.1989 |
| v72 | 3259.67 | 9.4824  | 3220.08 | 13.2794 |

|     | <b>i10</b> |         | <b>i12</b> |         |
|-----|------------|---------|------------|---------|
| v1  | 19.27      | 0.2022  | 34.25      | 0.0873  |
| v2  | 32.48      | 0.1382  | 65         | 0.2501  |
| v3  | 61.79      | 0.3118  | 132.43     | 0.1263  |
| v4  | 98.51      | 0.4467  | 143.77     | 0.5271  |
| v5  | 143.1      | 0.2257  | 168        | 0.3877  |
| v6  | 169.09     | 0.2292  | 251        | 3.3135  |
| v7  | 220.15     | 0.5417  | 290.7      | 0.5578  |
| v8  | 230.58     | 0.3297  | 303.42     | 0.3941  |
| v9  | 290.96     | 1.7108  | 334.79     | 0.2817  |
| v10 | 325.79     | 4.122   | 417.29     | 0.7921  |
| v11 | 335.68     | 1.0343  | 420.23     | 4.3871  |
| v12 | 413.42     | 0.576   | 455.96     | 6.0466  |
| v13 | 424.86     | 3.1404  | 541.57     | 1.1391  |
| v14 | 478.4      | 2.5539  | 559.1      | 0.4344  |
| v15 | 488.97     | 4.8747  | 578.66     | 2.8963  |
| v16 | 526.03     | 2.792   | 610.92     | 0.0568  |
| v17 | 530.86     | 3.3389  | 640.97     | 0.1     |
| v18 | 631.69     | 0.3211  | 713.21     | 29.4522 |
| v19 | 687.98     | 6.4612  | 717.28     | 8.2245  |
| v20 | 694.03     | 39.5352 | 756.29     | 63.1177 |

|     |         |         |         |         |
|-----|---------|---------|---------|---------|
| v21 | 737.7   | 4.944   | 787.29  | 7.1596  |
| v22 | 741.93  | 2.0789  | 792.07  | 8.5767  |
| v23 | 764.27  | 44.5506 | 802.75  | 0.2539  |
| v24 | 803.31  | 10.4682 | 861.16  | 0.0644  |
| v25 | 831.98  | 12.2352 | 931.32  | 0.2193  |
| v26 | 843.68  | 2.1029  | 954.09  | 1.4983  |
| v27 | 910.04  | 3.6423  | 956.41  | 7.0121  |
| v28 | 916.18  | 1.2492  | 968.89  | 0.2344  |
| v29 | 963.96  | 44.2451 | 990.33  | 14.1327 |
| v30 | 978.45  | 4.1383  | 1001.74 | 5.7491  |
| v31 | 997.25  | 0.6241  | 1005.76 | 0.2329  |
| v32 | 1000.87 | 0.0213  | 1021.04 | 0.4799  |
| v33 | 1013.2  | 0.0025  | 1024.8  | 0.0477  |
| v34 | 1038.86 | 1.3655  | 1071.5  | 2.6263  |
| v35 | 1044.44 | 12.3396 | 1072.7  | 4.2137  |
| v36 | 1048.18 | 2.7789  | 1093.1  | 5.9942  |
| v37 | 1074.97 | 2.468   | 1128.96 | 4.1211  |
| v38 | 1098.47 | 3.1664  | 1149.59 | 6.4088  |
| v39 | 1113.56 | 4.8297  | 1192.12 | 0.7087  |
| v40 | 1167.71 | 15.0062 | 1207.05 | 5.1717  |
| v41 | 1179.47 | 0.3436  | 1218.54 | 0.532   |
| v42 | 1218.12 | 4.8391  | 1236.52 | 0.1049  |
| v43 | 1255.09 | 1.8042  | 1287.82 | 5.3223  |
| v44 | 1301.68 | 0.672   | 1302.06 | 3.7734  |
| v45 | 1344.4  | 0.2831  | 1330.23 | 1.798   |
| v46 | 1354.67 | 0.0728  | 1345.42 | 0.2035  |
| v47 | 1367.42 | 5.4583  | 1382.51 | 0.5153  |
| v48 | 1399.22 | 2.8395  | 1383.65 | 5.1169  |
| v49 | 1424.33 | 1.4984  | 1423.43 | 2.3509  |
| v50 | 1467.5  | 7.2176  | 1439.23 | 1.1298  |
| v51 | 1472.34 | 1.4905  | 1454.91 | 6.2727  |
| v52 | 1487.49 | 9.3762  | 1489.45 | 6.8124  |
| v53 | 1502.91 | 16.9686 | 1493    | 11.2903 |
| v54 | 1509.26 | 5.856   | 1501.96 | 4.092   |
| v55 | 1591.27 | 3.8984  | 1549.18 | 18.1652 |
| v56 | 1614.78 | 5.6524  | 1557.91 | 8.2066  |
| v57 | 1680.98 | 16.3303 | 1645.5  | 3.7652  |
| v58 | 1724.62 | 2.6859  | 1665.41 | 35.4408 |
| v59 | 1886.59 | 4.3943  | 1674.93 | 0.3893  |

|     |         |         |         |         |
|-----|---------|---------|---------|---------|
| v60 | 3044.62 | 35.0098 | 2954.71 | 23.457  |
| v61 | 3069.28 | 22.1733 | 2991.51 | 19.2861 |
| v62 | 3103.19 | 15.4185 | 3045.92 | 37.3099 |
| v63 | 3140.61 | 13.3294 | 3106.54 | 16.67   |
| v64 | 3163.94 | 5.8445  | 3135.91 | 16.2824 |
| v65 | 3167.08 | 38.6276 | 3178.74 | 20.5252 |
| v66 | 3191.2  | 3.144   | 3187.56 | 11.7373 |
| v67 | 3196.91 | 1.91    | 3189.95 | 0.2785  |
| v68 | 3197.85 | 5.4287  | 3197.23 | 11.6454 |
| v69 | 3210.41 | 8.2819  | 3205.94 | 3.9973  |
| v70 | 3216.15 | 17.4616 | 3213.68 | 20.3323 |
| v71 | 3223.45 | 12.4541 | 3221.64 | 28.3882 |
| v72 | 3250.4  | 10.038  | 3225.64 | 4.1537  |

---

**i25**

---

|     |        |         |
|-----|--------|---------|
| v1  | 32.75  | 0.1613  |
| v2  | 89.26  | 0.1501  |
| v3  | 107.09 | 0.0197  |
| v4  | 146.03 | 0.3372  |
| v5  | 162.06 | 0.0883  |
| v6  | 240.22 | 0.378   |
| v7  | 247.11 | 0.4344  |
| v8  | 317.99 | 0.7993  |
| v9  | 332.69 | 3.099   |
| v10 | 365.83 | 0.3503  |
| v11 | 420.6  | 0.0312  |
| v12 | 433.92 | 11.3541 |
| v13 | 521.94 | 13.2003 |
| v14 | 545.87 | 0.1609  |
| v15 | 588.81 | 5.9079  |
| v16 | 634.9  | 2.7915  |
| v17 | 644.46 | 1.9265  |
| v18 | 712.49 | 34.6165 |
| v19 | 754.11 | 4.9343  |
| v20 | 767.48 | 34.5403 |
| v21 | 793.28 | 0.0115  |
| v22 | 847.35 | 1.299   |
| v23 | 853.17 | 9.1949  |
| v24 | 869.85 | 27.9105 |
| v25 | 892.8  | 0.0751  |

|     |         |         |
|-----|---------|---------|
| v26 | 892.92  | 0.4996  |
| v27 | 912.69  | 0.4034  |
| v28 | 937.2   | 2.1035  |
| v29 | 944.86  | 10.8731 |
| v30 | 1001.76 | 1.4616  |
| v31 | 1003.44 | 0.1549  |
| v32 | 1018.8  | 0.0287  |
| v33 | 1022.21 | 0.0284  |
| v34 | 1032.46 | 7.8707  |
| v35 | 1051.73 | 1.1716  |
| v36 | 1064.23 | 4.7729  |
| v37 | 1120.8  | 3.1749  |
| v38 | 1171.82 | 8.4707  |
| v39 | 1180.23 | 0.0131  |
| v40 | 1187.85 | 0.6739  |
| v41 | 1214.32 | 3.1056  |
| v42 | 1219.98 | 3.4208  |
| v43 | 1251.29 | 0.5709  |
| v44 | 1295.37 | 0.7946  |
| v45 | 1332.55 | 0.3356  |
| v46 | 1347.59 | 2.1399  |
| v47 | 1360.94 | 1.2937  |
| v48 | 1385.54 | 6.2044  |
| v49 | 1417.36 | 0.6474  |
| v50 | 1425.05 | 3.3713  |
| v51 | 1450.16 | 6.4662  |
| v52 | 1475.96 | 1.4994  |
| v53 | 1483.48 | 8.1071  |
| v54 | 1493    | 10.4979 |
| v55 | 1535.05 | 3.8843  |
| v56 | 1541.05 | 30.2484 |
| v57 | 1603.85 | 24.5334 |
| v58 | 1639.06 | 1.7026  |
| v59 | 1664.01 | 16.2714 |
| v60 | 3029.25 | 44.0939 |
| v61 | 3041.72 | 12.9683 |
| v62 | 3076.99 | 0.9624  |
| v63 | 3079.96 | 23.6854 |
| v64 | 3130.75 | 18.9547 |

|       |               |         |               |          |
|-------|---------------|---------|---------------|----------|
| v65   | 3156.06       | 12.6877 |               |          |
| v66   | 3183.3        | 7.5928  |               |          |
| v67   | 3192.29       | 0.1208  |               |          |
| v68   | 3202.87       | 25.4983 |               |          |
| v69   | 3212.45       | 19.5128 |               |          |
| v70   | 3217.5        | 25.0357 |               |          |
| v71   | 3230.7        | 12.5733 |               |          |
| v72   | 3257          | 4.3882  |               |          |
| <hr/> |               |         |               |          |
|       | <b>tsi5i7</b> |         | <b>tsi5i6</b> |          |
| v1    | -643.73       | 20.7754 | -1886.54      | 854.1453 |
| v2    | 14.66         | 0.1504  | 38.71         | 0.125    |
| v3    | 54.03         | 0.3295  | 41.59         | 0.5005   |
| v4    | 91.94         | 0.5459  | 45.42         | 0.3288   |
| v5    | 109.81        | 0.8769  | 119.84        | 0.2692   |
| v6    | 168.94        | 1.0994  | 134.09        | 0.4996   |
| v7    | 219.06        | 2.3948  | 185.1         | 2.4434   |
| v8    | 234.1         | 0.5169  | 208.73        | 0.1555   |
| v9    | 299.97        | 4.3193  | 215.4         | 0.2074   |
| v10   | 315.09        | 2.5838  | 259.7         | 0.9148   |
| v11   | 382.83        | 0.9123  | 341.14        | 3.5266   |
| v12   | 417.96        | 0.0438  | 415           | 0.0066   |
| v13   | 432.3         | 3.0916  | 440.62        | 4.9108   |
| v14   | 469.56        | 7.8172  | 453.97        | 4.3066   |
| v15   | 490.84        | 3.5501  | 492.58        | 17.7613  |
| v16   | 514.42        | 22.7874 | 511.69        | 1.1828   |
| v17   | 545.88        | 9.7979  | 535.06        | 19.8228  |
| v18   | 627.63        | 1.3889  | 546.91        | 2.4114   |
| v19   | 646.87        | 2.3114  | 575.93        | 3.4839   |
| v20   | 682.4         | 22.6563 | 640.49        | 0.3356   |
| v21   | 720.94        | 30.7338 | 675.11        | 1.4775   |
| v22   | 730.63        | 0.5593  | 704.2         | 17.4604  |
| v23   | 787.72        | 19.2278 | 712.95        | 34.4063  |
| v24   | 788.78        | 30.4521 | 753.77        | 6.6933   |
| v25   | 858.54        | 0.943   | 777.52        | 47.8215  |
| v26   | 866.65        | 6.6414  | 828.82        | 5.4962   |
| v27   | 875.14        | 0.2243  | 863.08        | 0.0144   |
| v28   | 953.31        | 1.9335  | 868.35        | 0.4134   |
| v29   | 956.9         | 2.2557  | 886.55        | 50.2423  |
| v30   | 982.02        | 1.682   | 935.9         | 3.79     |

|     |         |         |         |         |
|-----|---------|---------|---------|---------|
| v31 | 987.29  | 4.4358  | 998.85  | 1.0995  |
| v32 | 1012.43 | 0.0064  | 1005.57 | 0.0156  |
| v33 | 1018.98 | 0.3786  | 1012.57 | 7.5061  |
| v34 | 1028.86 | 0.0793  | 1020.89 | 19.3898 |
| v35 | 1031.24 | 0.0488  | 1023.28 | 0.662   |
| v36 | 1066.43 | 5.5158  | 1034.25 | 9.659   |
| v37 | 1073.74 | 0.4379  | 1050.52 | 3.3899  |
| v38 | 1108.76 | 0.4582  | 1066.57 | 1.3427  |
| v39 | 1115.22 | 6.4049  | 1069.91 | 0.246   |
| v40 | 1188.64 | 0.0244  | 1115.59 | 5.4417  |
| v41 | 1204.91 | 1.708   | 1187.58 | 0.1788  |
| v42 | 1212.96 | 0.0979  | 1210.21 | 5.498   |
| v43 | 1223.84 | 3.6597  | 1255.81 | 21.7496 |
| v44 | 1272.17 | 2.9408  | 1290.05 | 0.1781  |
| v45 | 1317.2  | 0.3418  | 1312.38 | 0.405   |
| v46 | 1323.94 | 1.4821  | 1322.64 | 39.7197 |
| v47 | 1361.3  | 0.6937  | 1356.56 | 12.0354 |
| v48 | 1366.32 | 1.5058  | 1362.31 | 0.099   |
| v49 | 1418.15 | 2.2995  | 1415.12 | 9.2959  |
| v50 | 1472.82 | 2.6937  | 1444.2  | 2.5063  |
| v51 | 1485.05 | 7.2559  | 1488.75 | 3.5516  |
| v52 | 1489.09 | 6.2837  | 1494.53 | 8.7464  |
| v53 | 1492.43 | 5.2331  | 1507.96 | 7.9298  |
| v54 | 1501.67 | 7.0203  | 1524.35 | 60.9203 |
| v55 | 1543.59 | 23.7057 | 1545.14 | 12.7269 |
| v56 | 1648.33 | 2.5856  | 1618.01 | 14.0967 |
| v57 | 1666.97 | 4.2263  | 1629    | 2.9109  |
| v58 | 1677.86 | 11.4068 | 1656.79 | 45.538  |
| v59 | 2093.92 | 0.5538  | 1786.26 | 70.6952 |
| v60 | 3028.48 | 26.5395 | 2161.98 | 31.5888 |
| v61 | 3040.71 | 32.7229 | 3045.31 | 22.9446 |
| v62 | 3091.75 | 14.376  | 3103.9  | 16.1948 |
| v63 | 3101.38 | 18.502  | 3143.51 | 19.7243 |
| v64 | 3131.73 | 10.6466 | 3157.85 | 9.263   |
| v65 | 3135.35 | 18.7738 | 3184.86 | 3.484   |
| v66 | 3182.79 | 18.6847 | 3191.77 | 6.1303  |
| v67 | 3191.06 | 1.3028  | 3192.48 | 3.9981  |
| v68 | 3199.26 | 3.3613  | 3198.86 | 2.8569  |
| v69 | 3209.76 | 15.1653 | 3210.74 | 7.8971  |

|     |                |         |               |         |
|-----|----------------|---------|---------------|---------|
| v70 | 3216.87        | 17.7595 | 3216.33       | 20.8839 |
| v71 | 3222.93        | 8.7067  | 3223.34       | 17.6081 |
| v72 | 3225.03        | 5.5702  | 3248.48       | 10.421  |
|     | <b>tsi5i23</b> |         | <b>tsi5p4</b> |         |
| v1  | -553.38        | 10.8601 | -769.03       | 18.7375 |
| v2  | 24.53          | 0.0364  | 20.94         | 0.1597  |
| v3  | 38.4           | 0.1565  | 40.1          | 0.2474  |
| v4  | 48.5           | 0.4133  | 47.88         | 0.0974  |
| v5  | 88.6           | 0.9045  | 90.91         | 1.2093  |
| v6  | 166.95         | 1.2291  | 138.79        | 0.2259  |
| v7  | 183.89         | 1.062   | 207.6         | 0.9956  |
| v8  | 226.11         | 1.8537  | 227.24        | 3.5721  |
| v9  | 267.66         | 3.989   | 258.47        | 1.781   |
| v10 | 322.19         | 3.8676  | 300.14        | 0.5002  |
| v11 | 345.99         | 1.6557  | 337.09        | 10.4476 |
| v12 | 398.35         | 3.4958  | 357.52        | 5.5156  |
| v13 | 417.69         | 0.0176  | 389.68        | 16.2062 |
| v14 | 420.26         | 0.6494  | 416.77        | 0.0059  |
| v15 | 483.34         | 1.8561  | 439.93        | 2.225   |
| v16 | 497.23         | 1.7448  | 455.72        | 6.6337  |
| v17 | 542.31         | 2.0536  | 459.37        | 9.4233  |
| v18 | 558.48         | 0.0706  | 551.59        | 10.4731 |
| v19 | 641.51         | 0.007   | 556.49        | 1.7799  |
| v20 | 663.72         | 1.0403  | 601.48        | 1.0978  |
| v21 | 716.87         | 32.9422 | 642.59        | 0.0368  |
| v22 | 732.75         | 4.46    | 704.97        | 2.3982  |
| v23 | 778.31         | 16.1979 | 712.27        | 0.3133  |
| v24 | 787.3          | 37.0975 | 719.27        | 34.591  |
| v25 | 812.06         | 9.9719  | 760.66        | 1.2913  |
| v26 | 871            | 0.0119  | 791.77        | 38.4704 |
| v27 | 879.69         | 1.0521  | 832.29        | 7.1892  |
| v28 | 945.21         | 2.6041  | 850.03        | 8.3184  |
| v29 | 950.31         | 3.7028  | 875.24        | 0.0641  |
| v30 | 971.2          | 3.4233  | 942.09        | 42.9656 |
| v31 | 981.53         | 6.7758  | 959.29        | 3.428   |
| v32 | 1010.23        | 0.0072  | 971.28        | 0.1862  |
| v33 | 1016.06        | 1.1076  | 1007.15       | 3.7928  |
| v34 | 1023.74        | 0.4699  | 1013.18       | 0.004   |
| v35 | 1028.47        | 0.0553  | 1020.38       | 2.4122  |



|     |         |         |         |         |
|-----|---------|---------|---------|---------|
| v36 | 1062.24 | 3.0198  | 1027.73 | 0.0085  |
| v37 | 1076.14 | 4.1544  | 1033.06 | 0.0533  |
| v38 | 1102    | 0.2462  | 1057.69 | 2.6602  |
| v39 | 1113.95 | 5.8192  | 1067.01 | 11.7608 |
| v40 | 1188.35 | 0       | 1079.65 | 1.756   |
| v41 | 1202.62 | 1.4466  | 1114.83 | 5.2004  |
| v42 | 1209.85 | 0.4892  | 1190.73 | 0.103   |
| v43 | 1220.02 | 2.922   | 1212.6  | 0.2426  |
| v44 | 1276.96 | 4.4013  | 1239.01 | 4.2235  |
| v45 | 1314.64 | 0.0146  | 1305.68 | 1.7528  |
| v46 | 1353.43 | 12.9235 | 1317.91 | 0.4614  |
| v47 | 1360.17 | 4.1709  | 1351.6  | 1.9499  |
| v48 | 1360.98 | 0.1542  | 1362.09 | 0.3145  |
| v49 | 1417.04 | 2.4732  | 1416.61 | 0.4223  |
| v50 | 1468.69 | 1.6683  | 1441.98 | 7.7294  |
| v51 | 1476.46 | 4.6894  | 1468.52 | 5.4036  |
| v52 | 1484.36 | 7.9737  | 1492.8  | 14.1501 |
| v53 | 1490.68 | 4.4206  | 1492.87 | 6.3916  |
| v54 | 1496.78 | 8.2971  | 1514.49 | 26.7576 |
| v55 | 1540.03 | 36.4762 | 1544.52 | 30.0769 |
| v56 | 1637.82 | 2.1902  | 1592.36 | 14.9958 |
| v57 | 1666.81 | 25.3883 | 1646.62 | 1.5059  |
| v58 | 1732.52 | 7.8647  | 1674.53 | 6.2683  |
| v59 | 2177.01 | 21.5659 | 1679.09 | 12.2198 |
| v60 | 3029.79 | 23.2819 | 2344.78 | 5.8729  |
| v61 | 3039.16 | 40.085  | 3059.38 | 10.8355 |
| v62 | 3073.26 | 11.7243 | 3128.11 | 8.4337  |
| v63 | 3099.62 | 17.5434 | 3143.28 | 19.7097 |
| v64 | 3128.86 | 21.8078 | 3158.09 | 6.9661  |
| v65 | 3134.97 | 16.6059 | 3169.32 | 1.6421  |
| v66 | 3189.55 | 24.4978 | 3186.57 | 12.894  |
| v67 | 3191.11 | 2.2531  | 3193.08 | 1.4063  |
| v68 | 3198.95 | 3.4461  | 3201.59 | 2.1343  |
| v69 | 3210.32 | 12.1502 | 3210.94 | 12.0079 |
| v70 | 3216.55 | 19.6906 | 3218.4  | 17.3649 |
| v71 | 3222.78 | 9.977   | 3224.32 | 10.8061 |
| v72 | 3222.94 | 6.4451  | 3247.07 | 9.3901  |

---

|    | <b>tsi7i8</b> |         | <b>tsi6i8</b> |        |
|----|---------------|---------|---------------|--------|
| v1 | -1622.21      | 35.0766 | -369.65       | 4.2695 |

|     |         |         |         |         |
|-----|---------|---------|---------|---------|
| v2  | 35.7    | 0.2247  | 37.01   | 0.0794  |
| v3  | 52.5    | 0.7493  | 57.65   | 0.2125  |
| v4  | 107.89  | 0.8836  | 71.45   | 0.6599  |
| v5  | 182.13  | 0.6189  | 117     | 0.139   |
| v6  | 208.45  | 1.3826  | 151.37  | 0.1605  |
| v7  | 224.69  | 0.6478  | 190.92  | 0.7931  |
| v8  | 299.11  | 2.4919  | 234.09  | 0.5272  |
| v9  | 309     | 1.7948  | 273.27  | 0.5948  |
| v10 | 377.33  | 2.1475  | 360.09  | 0.2173  |
| v11 | 418.15  | 0.0803  | 407.81  | 2.6803  |
| v12 | 441.7   | 2.0598  | 416.2   | 0.0915  |
| v13 | 461.37  | 29.4422 | 448.76  | 3.1321  |
| v14 | 469.94  | 1.5598  | 488.11  | 20.1779 |
| v15 | 519.85  | 4.3316  | 514.44  | 3.4775  |
| v16 | 584.1   | 14.985  | 537.05  | 13.5858 |
| v17 | 621.84  | 3.0291  | 580.83  | 5.0824  |
| v18 | 639.18  | 0.1673  | 636.59  | 0.2836  |
| v19 | 703.2   | 28.1142 | 711.99  | 35.6295 |
| v20 | 715.07  | 30.8779 | 731.42  | 7.1359  |
| v21 | 750.83  | 37.9728 | 740.39  | 15.9569 |
| v22 | 790.6   | 33.6392 | 764.7   | 20.716  |
| v23 | 808.21  | 4.7933  | 781.08  | 28.0465 |
| v24 | 866.23  | 0.3433  | 828.44  | 5.0025  |
| v25 | 886.11  | 28.8063 | 862.69  | 0.0447  |
| v26 | 891.17  | 7.4147  | 885.93  | 2.0629  |
| v27 | 909.96  | 18.4269 | 915.61  | 11.8003 |
| v28 | 946.1   | 2.3993  | 935.88  | 0.4373  |
| v29 | 987.97  | 0.4307  | 953.24  | 20.1089 |
| v30 | 1008.19 | 0.1998  | 979.58  | 1.4708  |
| v31 | 1019.56 | 1.0823  | 1005.91 | 0.2236  |
| v32 | 1028.53 | 0.4006  | 1006.24 | 2.4673  |
| v33 | 1029.03 | 1.7746  | 1012.26 | 2.8521  |
| v34 | 1062.66 | 2.9272  | 1022.82 | 0.0096  |
| v35 | 1070.48 | 1.6092  | 1027.76 | 1.7956  |
| v36 | 1071.91 | 1.0117  | 1032.54 | 1.9422  |
| v37 | 1117.74 | 8.859   | 1058.46 | 4.7332  |
| v38 | 1165.71 | 1.7706  | 1067.46 | 2.9715  |
| v39 | 1175.23 | 12.3701 | 1113.03 | 5.2088  |
| v40 | 1188.19 | 0.8315  | 1171.19 | 4.5926  |

|     |         |         |         |         |
|-----|---------|---------|---------|---------|
| v41 | 1213.86 | 0.3211  | 1185.32 | 0.0932  |
| v42 | 1225.22 | 0.7597  | 1213.93 | 0.1061  |
| v43 | 1242.08 | 27.0976 | 1239.64 | 3.4846  |
| v44 | 1310.04 | 9.3761  | 1289.12 | 2.047   |
| v45 | 1323.41 | 2.8726  | 1308.28 | 0.5413  |
| v46 | 1330.72 | 13.6299 | 1341.54 | 4.8217  |
| v47 | 1365.77 | 1.5931  | 1357.24 | 0.1958  |
| v48 | 1375.31 | 17.7964 | 1412.74 | 2.0249  |
| v49 | 1399.45 | 17.476  | 1430.75 | 2.6975  |
| v50 | 1420.92 | 7.4702  | 1470.11 | 3.8885  |
| v51 | 1465.84 | 13.5699 | 1483.7  | 4.1766  |
| v52 | 1485.59 | 12.2729 | 1486.74 | 7.2852  |
| v53 | 1486.39 | 23.7921 | 1501.35 | 14.6749 |
| v54 | 1491.9  | 7.675   | 1520.85 | 25.7108 |
| v55 | 1499.38 | 19.1477 | 1577.58 | 1.7216  |
| v56 | 1541.25 | 18.3744 | 1620.62 | 2.649   |
| v57 | 1640.87 | 3.8759  | 1641.68 | 6.1419  |
| v58 | 1665.47 | 6.2115  | 1653.21 | 24.2267 |
| v59 | 1708.94 | 19.4318 | 1750.69 | 0.5552  |
| v60 | 2124.64 | 26.1692 | 3038.08 | 36.552  |
| v61 | 2993.15 | 22.2777 | 3088.54 | 16.0807 |
| v62 | 3035.94 | 27.2505 | 3095.28 | 15.6413 |
| v63 | 3091.79 | 14.1609 | 3135.5  | 14.8626 |
| v64 | 3104.28 | 11.6192 | 3154.56 | 16.14   |
| v65 | 3137.66 | 19.1882 | 3159    | 4.239   |
| v66 | 3159.34 | 12.6196 | 3189.11 | 7.7622  |
| v67 | 3187.24 | 3.4885  | 3189.56 | 26.0561 |
| v68 | 3191.18 | 28.7224 | 3195.42 | 2.1072  |
| v69 | 3195.49 | 8.2584  | 3207.13 | 7.3333  |
| v70 | 3209.42 | 15.1417 | 3212.36 | 22.6724 |
| v71 | 3215.74 | 20.6459 | 3220.98 | 15.5729 |
| v72 | 3220.83 | 13.4126 | 3248.38 | 5.1886  |

|    | <b>tsi6p4</b> |        | <b>tsi8p3</b> |         |
|----|---------------|--------|---------------|---------|
| v1 | -790.09       | 6.6522 | -708.77       | 14.5191 |
| v2 | 23.74         | 0.3293 | 59.9          | 0.1169  |
| v3 | 42.32         | 0.7406 | 83.04         | 0.0042  |
| v4 | 46.95         | 0.0787 | 93.34         | 1.3551  |
| v5 | 83.45         | 3.3811 | 126.62        | 0.3755  |
| v6 | 88.41         | 1.22   | 210.46        | 1.4862  |

|     |         |         |         |         |
|-----|---------|---------|---------|---------|
| v7  | 148.71  | 1.905   | 251.23  | 0.5093  |
| v8  | 230.27  | 0.3268  | 291.49  | 1.1865  |
| v9  | 264.42  | 1.8292  | 317.69  | 1.156   |
| v10 | 286.97  | 0.2448  | 335.44  | 0.408   |
| v11 | 317.29  | 3.5063  | 406.15  | 1.6349  |
| v12 | 364.32  | 4.9061  | 421.12  | 0.033   |
| v13 | 416.36  | 0.0761  | 432.3   | 2.1466  |
| v14 | 421.6   | 12.936  | 496.47  | 6.7062  |
| v15 | 439.42  | 2.9794  | 529.4   | 2.5191  |
| v16 | 460.43  | 3.6778  | 540.9   | 2.0384  |
| v17 | 473.51  | 30.4634 | 604.36  | 4.0996  |
| v18 | 552.15  | 2.7945  | 635.65  | 3.9916  |
| v19 | 567.56  | 5.1659  | 641.19  | 0.6997  |
| v20 | 609.38  | 4.0171  | 727.35  | 33.7825 |
| v21 | 642.18  | 0.0725  | 734.27  | 6.3694  |
| v22 | 708.45  | 5.7219  | 745.29  | 10.0822 |
| v23 | 716.79  | 30.027  | 786.6   | 61.7904 |
| v24 | 726.19  | 9.403   | 825.41  | 4.9636  |
| v25 | 755.27  | 0.6542  | 877.89  | 0.7902  |
| v26 | 790.05  | 43.6506 | 882.01  | 1.1507  |
| v27 | 820.45  | 14.16   | 938.69  | 0.246   |
| v28 | 837.64  | 1.1447  | 958.61  | 2.2358  |
| v29 | 873.77  | 0.0489  | 986.2   | 4.1919  |
| v30 | 949.74  | 41.2056 | 1009.45 | 0.6574  |
| v31 | 957.54  | 4.2332  | 1013.53 | 0.389   |
| v32 | 971.81  | 0.4073  | 1015.66 | 0.4196  |
| v33 | 1013.37 | 0.0058  | 1027.8  | 0.1769  |
| v34 | 1017.58 | 1.5921  | 1031.96 | 0.2406  |
| v35 | 1021.75 | 0.9181  | 1032.34 | 0.1723  |
| v36 | 1026.64 | 0.0707  | 1062.26 | 4.0577  |
| v37 | 1033.36 | 0.0366  | 1072.87 | 2.5729  |
| v38 | 1058.76 | 2.5627  | 1088.2  | 1.1938  |
| v39 | 1066.65 | 11.6716 | 1120.9  | 5.4447  |
| v40 | 1081.65 | 1.452   | 1131.93 | 4.4615  |
| v41 | 1115.82 | 5.1065  | 1190.4  | 0.022   |
| v42 | 1190.92 | 0.1233  | 1203.43 | 1.0456  |
| v43 | 1212.39 | 0.3614  | 1220.47 | 1.467   |
| v44 | 1252.56 | 2.8033  | 1224.04 | 0.1165  |
| v45 | 1309.66 | 0.8233  | 1303.78 | 1.8905  |

|     |         |         |         |         |
|-----|---------|---------|---------|---------|
| v46 | 1318.09 | 0.5118  | 1327.67 | 0.8286  |
| v47 | 1356.5  | 1.196   | 1331.57 | 0.6564  |
| v48 | 1362.62 | 0.354   | 1354.34 | 0.0296  |
| v49 | 1417.11 | 0.0624  | 1368.64 | 1.6015  |
| v50 | 1440.84 | 5.613   | 1421.5  | 3.2382  |
| v51 | 1469.46 | 1.9705  | 1444.44 | 3.5753  |
| v52 | 1492.04 | 5.0545  | 1490.62 | 6.7091  |
| v53 | 1492.8  | 10.9615 | 1495.22 | 10.6647 |
| v54 | 1509.59 | 30.4327 | 1507.47 | 7.8433  |
| v55 | 1543.63 | 27.4695 | 1535.63 | 41.1943 |
| v56 | 1642.36 | 1.928   | 1558.07 | 0.6983  |
| v57 | 1669.13 | 13.0662 | 1645.19 | 19.6708 |
| v58 | 1679.99 | 4.9325  | 1654.87 | 17.4173 |
| v59 | 1719.25 | 3.9259  | 1659.7  | 5.089   |
| v60 | 2246.5  | 6.2215  | 1681.17 | 5.0382  |
| v61 | 3057.83 | 10.8115 | 3044.63 | 26.9395 |
| v62 | 3125.8  | 8.7849  | 3107.03 | 10.4423 |
| v63 | 3141.9  | 21.0661 | 3138.8  | 15.4174 |
| v64 | 3157.44 | 6.5646  | 3183.89 | 3.9157  |
| v65 | 3166.47 | 1.4026  | 3187.36 | 1.9385  |
| v66 | 3187.39 | 15.922  | 3188.45 | 3.7817  |
| v67 | 3194.09 | 1.4648  | 3192.48 | 1.31    |
| v68 | 3202.6  | 2.4078  | 3199.8  | 20.1443 |
| v69 | 3212.06 | 10.8759 | 3202.16 | 0.1833  |
| v70 | 3219.53 | 15.6579 | 3208.97 | 20.399  |
| v71 | 3225.15 | 10.8437 | 3215.53 | 19.2841 |
| v72 | 3245.01 | 10.2819 | 3219.49 | 16.406  |

|     | <b>tsi23i24</b> |         | <b>tsi24p11</b> |         |
|-----|-----------------|---------|-----------------|---------|
| v1  | -2342.62        | 40.9971 | -586.89         | 64.5244 |
| v2  | 29.83           | 0.1192  | 47.57           | 0.5563  |
| v3  | 51.94           | 0.7809  | 55.84           | 0.8538  |
| v4  | 79.55           | 0.6711  | 102.63          | 0.1257  |
| v5  | 153.29          | 0.5039  | 139.85          | 0.249   |
| v6  | 162.66          | 0.4091  | 175.86          | 0.1128  |
| v7  | 222.66          | 0.0848  | 214.86          | 2.0252  |
| v8  | 270.32          | 1.8916  | 226             | 1.4986  |
| v9  | 302.85          | 0.3648  | 256.61          | 5.9139  |
| v10 | 369.12          | 3.801   | 282.51          | 1.3298  |
| v11 | 381.74          | 0.3623  | 331.01          | 2.8543  |

|     |         |         |         |         |
|-----|---------|---------|---------|---------|
| v12 | 418.01  | 0.0334  | 369.43  | 0.6117  |
| v13 | 454.67  | 10.9255 | 384.86  | 3.3454  |
| v14 | 517.26  | 15.2895 | 423.45  | 1.6296  |
| v15 | 549.63  | 4.4074  | 512.18  | 10.9699 |
| v16 | 604.55  | 1.6357  | 598.08  | 6.675   |
| v17 | 634.49  | 0.4613  | 598.87  | 8.2207  |
| v18 | 664.4   | 20.6782 | 636.59  | 0.2141  |
| v19 | 712.7   | 10.5501 | 653.81  | 8.6301  |
| v20 | 721.54  | 35.2514 | 681.79  | 6.8361  |
| v21 | 784.4   | 22.2931 | 724.13  | 30.0763 |
| v22 | 796.45  | 27.4603 | 739.68  | 22.009  |
| v23 | 818.16  | 17.2377 | 777.95  | 2.0136  |
| v24 | 873.05  | 7.1091  | 801.03  | 23.6979 |
| v25 | 875.48  | 10.0935 | 838.09  | 26.1017 |
| v26 | 920.66  | 2.7131  | 856.58  | 11.284  |
| v27 | 941.67  | 7.7343  | 879.34  | 0.2145  |
| v28 | 952.17  | 3.9786  | 929.93  | 9.9686  |
| v29 | 971.15  | 2.4172  | 933.6   | 10.1299 |
| v30 | 982.55  | 27.7402 | 940.57  | 20.0949 |
| v31 | 1010.43 | 0.0578  | 960.54  | 1.9244  |
| v32 | 1025.55 | 0.1804  | 972.52  | 10.4249 |
| v33 | 1029.49 | 0.2026  | 1015.68 | 17.1082 |
| v34 | 1031.35 | 5.6112  | 1017.52 | 7.0063  |
| v35 | 1063.64 | 3.6881  | 1028.56 | 0.2246  |
| v36 | 1072.79 | 3.0953  | 1034.72 | 0.3264  |
| v37 | 1114.54 | 9.0233  | 1065.32 | 4.4433  |
| v38 | 1127.17 | 2.3893  | 1069.27 | 3.0709  |
| v39 | 1154.45 | 11.9203 | 1106.65 | 7.5998  |
| v40 | 1188.76 | 0.063   | 1119.84 | 9.5635  |
| v41 | 1190.92 | 4.8714  | 1176.52 | 2.5546  |
| v42 | 1196.6  | 2.2978  | 1190.59 | 0.3684  |
| v43 | 1211.67 | 0.4107  | 1204.84 | 5.5664  |
| v44 | 1251.41 | 2.348   | 1216.54 | 2.0758  |
| v45 | 1291.11 | 0.7003  | 1259.05 | 0.0705  |
| v46 | 1302.97 | 2.2712  | 1306.48 | 5.8448  |
| v47 | 1320.36 | 5.3344  | 1335.3  | 0.1597  |
| v48 | 1346.75 | 4.1429  | 1364.4  | 1.3858  |
| v49 | 1361.94 | 1.1456  | 1376.98 | 39.159  |
| v50 | 1424.3  | 3.3432  | 1413.84 | 9.824   |

|     |         |         |         |         |
|-----|---------|---------|---------|---------|
| v51 | 1478.86 | 1.7188  | 1425.57 | 1.988   |
| v52 | 1486.08 | 8.4587  | 1487.34 | 6.8323  |
| v53 | 1491.03 | 8.5508  | 1494.19 | 1.7101  |
| v54 | 1495.73 | 10.1827 | 1498.47 | 21.2812 |
| v55 | 1537.87 | 15.0485 | 1521.13 | 21.538  |
| v56 | 1644.63 | 3.1898  | 1547.68 | 14.5764 |
| v57 | 1665.03 | 5.6435  | 1650.27 | 3.0181  |
| v58 | 1672.56 | 8.4077  | 1668.99 | 2.4788  |
| v59 | 1698.36 | 15.2452 | 1679.61 | 0.9729  |
| v60 | 1808.5  | 17.004  | 1731.13 | 81.5645 |
| v61 | 3036.21 | 30.4528 | 3042.49 | 36.5498 |
| v62 | 3044.83 | 33.186  | 3099.45 | 15.1593 |
| v63 | 3093.86 | 13.3396 | 3136.05 | 16.6413 |
| v64 | 3104.76 | 11.3416 | 3156.87 | 9.8758  |
| v65 | 3106.86 | 21.5224 | 3187.67 | 3.6481  |
| v66 | 3133.52 | 18.8262 | 3195.33 | 0.3174  |
| v67 | 3187.88 | 3.0776  | 3205.72 | 14.0864 |
| v68 | 3194.52 | 0.4146  | 3215.59 | 21.4117 |
| v69 | 3199.24 | 15.1527 | 3222.82 | 10.3449 |
| v70 | 3203.95 | 6.7609  | 3224.54 | 8.9225  |
| v71 | 3210.56 | 25.7129 | 3231.54 | 6.907   |
| v72 | 3220.02 | 17.8593 | 3273.18 | 2.4757  |

|     | <b>tsi9i11</b> |         | <b>tsi9i10</b> |          |
|-----|----------------|---------|----------------|----------|
| v1  | -680.17        | 24.9161 | -1873.04       | 784.6284 |
| v2  | 19.76          | 0.1717  | 37.64          | 0.0982   |
| v3  | 50.57          | 0.4718  | 40.87          | 0.2675   |
| v4  | 85.2           | 0.8472  | 48.06          | 0.0926   |
| v5  | 120.89         | 1.0779  | 96.05          | 0.3217   |
| v6  | 181.24         | 0.519   | 134.93         | 0.3892   |
| v7  | 219.62         | 0.5778  | 142.5          | 0.714    |
| v8  | 252.99         | 1.4336  | 214.52         | 0.1837   |
| v9  | 286.31         | 3.3786  | 245.38         | 0.2415   |
| v10 | 318.15         | 1.4158  | 271.03         | 1.2185   |
| v11 | 370.07         | 1.9011  | 332.15         | 0.2591   |
| v12 | 418.14         | 0.0418  | 345.14         | 1.0281   |
| v13 | 422.93         | 4.5873  | 381.16         | 10.3006  |
| v14 | 486.41         | 15.5689 | 415            | 0.0129   |
| v15 | 490.28         | 3.0621  | 479.48         | 4.3134   |
| v16 | 507.28         | 13.2301 | 516.67         | 17.5376  |

|     |         |         |         |         |
|-----|---------|---------|---------|---------|
| v17 | 546.13  | 9.1258  | 523.24  | 4.8409  |
| v18 | 634.96  | 1.0133  | 550.12  | 6.7519  |
| v19 | 641.75  | 18.1166 | 611.72  | 1.4069  |
| v20 | 658.88  | 8.5446  | 639.69  | 0.5176  |
| v21 | 721.14  | 33.1081 | 661.07  | 4.0399  |
| v22 | 736.94  | 2.0885  | 712.73  | 29.3362 |
| v23 | 787.44  | 36.8057 | 723.34  | 13.8576 |
| v24 | 800.94  | 13.0489 | 755.68  | 10.6695 |
| v25 | 817.06  | 6.9494  | 777.18  | 48.1889 |
| v26 | 876.04  | 0.0361  | 822.14  | 2.0279  |
| v27 | 897.96  | 3.245   | 862.11  | 0.0177  |
| v28 | 934.65  | 7.4322  | 893.57  | 48.95   |
| v29 | 956.93  | 2.4312  | 934.44  | 3.59    |
| v30 | 983.02  | 3.3316  | 977.43  | 4.7902  |
| v31 | 1008.7  | 1.1815  | 994.76  | 13.0415 |
| v32 | 1013.37 | 0.0034  | 1004.88 | 0.0051  |
| v33 | 1028.44 | 0.1288  | 1015.03 | 10.2556 |
| v34 | 1031.42 | 0.0366  | 1017.93 | 13.9173 |
| v35 | 1059.64 | 0.1095  | 1022.91 | 0.162   |
| v36 | 1066.68 | 4.0233  | 1042.97 | 14.4274 |
| v37 | 1073.98 | 2.9404  | 1052.59 | 3.3886  |
| v38 | 1115.56 | 6.6729  | 1063.64 | 0.9136  |
| v39 | 1156.85 | 3.361   | 1089.63 | 9.9455  |
| v40 | 1189.65 | 0.0111  | 1115.21 | 5.5518  |
| v41 | 1199.99 | 2.762   | 1187.49 | 0.2195  |
| v42 | 1213.67 | 0.2329  | 1209.68 | 4.5447  |
| v43 | 1221.07 | 0.5771  | 1240.21 | 0.3507  |
| v44 | 1273.14 | 2.7231  | 1311.05 | 18.9216 |
| v45 | 1317.75 | 0.3573  | 1312.53 | 27.4915 |
| v46 | 1322    | 1.625   | 1330.41 | 1.4252  |
| v47 | 1362.09 | 1.0526  | 1361.72 | 0.0013  |
| v48 | 1362.45 | 1.3118  | 1377.79 | 24.7882 |
| v49 | 1421.65 | 1.2607  | 1423.33 | 5.494   |
| v50 | 1468.48 | 4.0017  | 1452.74 | 2.7414  |
| v51 | 1485.73 | 5.3238  | 1474.82 | 16.178  |
| v52 | 1492.05 | 7.271   | 1488.43 | 3.1759  |
| v53 | 1492.75 | 2.3626  | 1491.49 | 8.2605  |
| v54 | 1500.59 | 6.4632  | 1523.22 | 29.4073 |
| v55 | 1544.02 | 24.5487 | 1541.31 | 25.81   |



|     |         |         |         |         |
|-----|---------|---------|---------|---------|
| v56 | 1648.33 | 2.2685  | 1619.9  | 32.1491 |
| v57 | 1654.73 | 1.9767  | 1628.06 | 3.0572  |
| v58 | 1677.8  | 11.6816 | 1656.15 | 51.2347 |
| v59 | 2080.28 | 1.9095  | 1793.83 | 63.8243 |
| v60 | 3026.37 | 12.9062 | 2158.87 | 28.9925 |
| v61 | 3028.81 | 56.3234 | 3035.11 | 31.7898 |
| v62 | 3079.25 | 18.1316 | 3087.85 | 15.1586 |
| v63 | 3083.54 | 17.347  | 3144.2  | 7.2892  |
| v64 | 3131.02 | 13.0071 | 3149.55 | 18.9166 |
| v65 | 3137.2  | 27.2446 | 3168.14 | 7.0863  |
| v66 | 3144.53 | 11.4603 | 3177.75 | 3.7315  |
| v67 | 3190.7  | 1.3005  | 3191.44 | 7.5424  |
| v68 | 3199.15 | 3.4634  | 3198.1  | 2.4838  |
| v69 | 3209.55 | 15.8779 | 3210.1  | 6.5477  |
| v70 | 3216.95 | 18.1978 | 3215.44 | 21.4916 |
| v71 | 3222.87 | 8.7755  | 3223.12 | 18.5718 |
| v72 | 3226.99 | 6.1527  | 3255.63 | 10.8507 |

|     | <b>tsi9i23</b> |         | <b>tsi9p6</b> |         |
|-----|----------------|---------|---------------|---------|
| v1  | -584.53        | 15.4857 | -685.35       | 34.5419 |
| v2  | 30.78          | 0.044   | 13.12         | 0.1009  |
| v3  | 36.6           | 0.0957  | 42.69         | 0.4512  |
| v4  | 48.63          | 0.7835  | 57.39         | 1.3798  |
| v5  | 98.15          | 1.2373  | 127.08        | 0.0852  |
| v6  | 170.36         | 0.449   | 133.09        | 0.138   |
| v7  | 183.77         | 0.7961  | 157.5         | 0.5134  |
| v8  | 236.56         | 1.757   | 201.78        | 0.1475  |
| v9  | 266.62         | 0.6127  | 247.25        | 6.3257  |
| v10 | 302.05         | 0.5217  | 290.45        | 1.8032  |
| v11 | 345.9          | 3.8182  | 300.44        | 10.7274 |
| v12 | 393.81         | 4.529   | 307.18        | 1.1721  |
| v13 | 399.26         | 4.8901  | 337.24        | 3.663   |
| v14 | 417.43         | 0.0035  | 384.52        | 1.3344  |
| v15 | 484.02         | 0.6068  | 416.43        | 0.0173  |
| v16 | 534.73         | 2.2601  | 434.14        | 17.944  |
| v17 | 541.1          | 2.0005  | 503.75        | 1.3693  |
| v18 | 564.46         | 0.0555  | 515.72        | 8.9294  |
| v19 | 602.53         | 0.9673  | 551.5         | 0.9177  |
| v20 | 642.32         | 0.0013  | 570.16        | 9.4236  |
| v21 | 716.36         | 33.2567 | 630.42        | 3.0441  |

|     |         |         |         |         |
|-----|---------|---------|---------|---------|
| v22 | 737.19  | 5.2109  | 645.56  | 0.5543  |
| v23 | 769.28  | 15.7541 | 718.55  | 34.5479 |
| v24 | 786.1   | 41.4811 | 733.59  | 0.628   |
| v25 | 814.11  | 6.4986  | 766.72  | 0.0155  |
| v26 | 870.12  | 0.0119  | 791.14  | 39.6092 |
| v27 | 871.66  | 0.6072  | 812.63  | 1.7305  |
| v28 | 932.1   | 4.3981  | 873.72  | 0.0038  |
| v29 | 949.17  | 3.3764  | 912.62  | 8.6339  |
| v30 | 975.97  | 2.384   | 957.91  | 1.5585  |
| v31 | 1006.33 | 4.9918  | 962.18  | 45.5131 |
| v32 | 1009.62 | 0.0057  | 998.8   | 0.4165  |
| v33 | 1023.69 | 0.5247  | 1011.92 | 0.0207  |
| v34 | 1027.85 | 0.0446  | 1027.3  | 0.231   |
| v35 | 1051.68 | 3.1245  | 1032.18 | 0.0236  |
| v36 | 1062.97 | 3.3535  | 1040.58 | 0.1247  |
| v37 | 1073.19 | 1.1624  | 1045.43 | 8.351   |
| v38 | 1113.85 | 5.833   | 1065.5  | 1.5155  |
| v39 | 1133.16 | 8.4688  | 1066.43 | 1.5269  |
| v40 | 1188.35 | 0.0013  | 1097.2  | 15.5162 |
| v41 | 1189.39 | 6.341   | 1115.04 | 5.4736  |
| v42 | 1209.47 | 1.7522  | 1190.85 | 0.0474  |
| v43 | 1221.9  | 1.2343  | 1213    | 0.1629  |
| v44 | 1277.19 | 10.8061 | 1259.64 | 6.9451  |
| v45 | 1314.72 | 0.0135  | 1310.95 | 12.2253 |
| v46 | 1324.13 | 2.473   | 1317.89 | 0.1968  |
| v47 | 1360.57 | 0.1271  | 1335.56 | 1.4561  |
| v48 | 1375.52 | 1.7563  | 1362.32 | 0.3869  |
| v49 | 1424.57 | 1.624   | 1380.71 | 2.6134  |
| v50 | 1470.02 | 4.0388  | 1424.67 | 2.9119  |
| v51 | 1476.45 | 1.6389  | 1462.12 | 11.0749 |
| v52 | 1485.7  | 7.3032  | 1486.66 | 7.806   |
| v53 | 1490.3  | 4.4478  | 1492.93 | 5.1225  |
| v54 | 1496.67 | 10.5228 | 1503.18 | 5.5359  |
| v55 | 1539.43 | 37.5311 | 1545.22 | 29.9064 |
| v56 | 1637.24 | 2.2314  | 1605.45 | 8.8136  |
| v57 | 1665.72 | 27.9461 | 1646.77 | 1.5439  |
| v58 | 1729.61 | 1.9763  | 1679.09 | 8.8274  |
| v59 | 2167.62 | 27.9365 | 1684.23 | 11.9524 |
| v60 | 3025.27 | 16.7534 | 2344.47 | 1.453   |

|     |         |         |         |         |
|-----|---------|---------|---------|---------|
| v61 | 3032.21 | 52.5128 | 3046.14 | 30.9346 |
| v62 | 3064.5  | 13.7243 | 3105.11 | 9.4307  |
| v63 | 3084.6  | 19.0985 | 3144.45 | 12.6918 |
| v64 | 3129.98 | 29.1352 | 3164.96 | 4.5872  |
| v65 | 3133.72 | 32.5091 | 3181.26 | 10.351  |
| v66 | 3139.4  | 11.9102 | 3186.62 | 3.232   |
| v67 | 3191.11 | 2.6494  | 3193.14 | 1.4051  |
| v68 | 3199.2  | 3.4747  | 3201.96 | 2.6671  |
| v69 | 3210.34 | 12.7565 | 3211.6  | 12.9809 |
| v70 | 3216.86 | 19.7008 | 3218.89 | 17.4233 |
| v71 | 3222.91 | 10.7169 | 3224.56 | 10.2137 |
| v72 | 3223.71 | 6.1312  | 3252.95 | 7.7426  |

|     | <b>tsi11i12</b> |         | <b>tsi10i12</b> |         |
|-----|-----------------|---------|-----------------|---------|
| v1  | -1659.26        | 23.658  | -373.6          | 2.1005  |
| v2  | 34.63           | 0.1728  | 40.26           | 0.0668  |
| v3  | 50.26           | 0.8493  | 58.03           | 0.6062  |
| v4  | 127.68          | 0.5989  | 66.82           | 0.1335  |
| v5  | 157.97          | 0.0882  | 139.99          | 0.0947  |
| v6  | 185.47          | 0.9713  | 167.53          | 0.1583  |
| v7  | 243.39          | 0.5044  | 211.43          | 0.1687  |
| v8  | 256.56          | 3.8859  | 230.89          | 1.1905  |
| v9  | 316.44          | 0.8476  | 271.75          | 0.713   |
| v10 | 331.26          | 1.3294  | 331.09          | 1.1461  |
| v11 | 417.33          | 0.6784  | 348.24          | 5.9344  |
| v12 | 429.9           | 4.592   | 415.69          | 0.212   |
| v13 | 460.81          | 6.2293  | 439.43          | 0.8222  |
| v14 | 502.87          | 8.6297  | 480.01          | 7.2899  |
| v15 | 527.06          | 29.4253 | 519.53          | 5.8203  |
| v16 | 562.82          | 3.516   | 530.05          | 9.7308  |
| v17 | 608.95          | 9.8566  | 568.39          | 3.5889  |
| v18 | 639.46          | 1.1984  | 636.5           | 0.2217  |
| v19 | 706.2           | 9.0987  | 679.87          | 8.6216  |
| v20 | 714.62          | 32.5692 | 711.69          | 36.4158 |
| v21 | 747.42          | 22.1873 | 738.07          | 18.1948 |
| v22 | 787.05          | 37.0522 | 768.61          | 16.1322 |
| v23 | 795.24          | 12.3953 | 783.45          | 21.1452 |
| v24 | 844             | 42.1783 | 828.57          | 19.0829 |
| v25 | 866.69          | 1.928   | 847.09          | 16.303  |
| v26 | 909.58          | 11.3885 | 862.84          | 0.0603  |
| v27 | 945.23          | 4.0891  | 924.46          | 0.4315  |
| v28 | 950.03          | 23.6605 | 937.25          | 0.585   |

|     |         |         |         |         |
|-----|---------|---------|---------|---------|
| v29 | 976.62  | 4.5045  | 960.31  | 16.3246 |
| v30 | 1008.3  | 0.1954  | 982.26  | 0.7555  |
| v31 | 1016.08 | 1.217   | 996.25  | 9.5028  |
| v32 | 1024.46 | 0.7451  | 1006.1  | 0.0208  |
| v33 | 1028.55 | 0.3477  | 1014.67 | 0.2774  |
| v34 | 1066.62 | 4.4116  | 1022.99 | 0.0422  |
| v35 | 1074.31 | 3.4555  | 1045.23 | 4.9734  |
| v36 | 1080.78 | 0.2528  | 1058.15 | 3.6334  |
| v37 | 1113.3  | 11.3255 | 1081.47 | 2.6837  |
| v38 | 1157.72 | 0.6613  | 1111.3  | 3.8354  |
| v39 | 1187.44 | 1.2077  | 1115.42 | 1.7755  |
| v40 | 1189.24 | 9.5219  | 1184.9  | 2.5129  |
| v41 | 1207.74 | 2.7366  | 1186.58 | 7.2651  |
| v42 | 1218.97 | 1.4182  | 1210.36 | 1.787   |
| v43 | 1237.76 | 26.4885 | 1219.04 | 1.069   |
| v44 | 1305.75 | 0.4234  | 1302.45 | 0.7851  |
| v45 | 1321.92 | 1.7705  | 1308.5  | 0.9045  |
| v46 | 1341.05 | 13.5656 | 1343.01 | 0.7549  |
| v47 | 1348.84 | 0.2156  | 1357.26 | 0.2602  |
| v48 | 1367.6  | 8.4214  | 1385.99 | 0.6141  |
| v49 | 1404.57 | 18.5955 | 1421.73 | 0.4458  |
| v50 | 1426.6  | 2.4677  | 1467.99 | 10.749  |
| v51 | 1468.73 | 17.3485 | 1483.58 | 5.1569  |
| v52 | 1484    | 32.372  | 1486.24 | 5.3269  |
| v53 | 1487.47 | 10.3811 | 1502.07 | 11.0945 |
| v54 | 1497.85 | 24.478  | 1520.69 | 23.9107 |
| v55 | 1501.21 | 15.5025 | 1583.7  | 3.4132  |
| v56 | 1538.88 | 16.4737 | 1620.49 | 2.7564  |
| v57 | 1640.5  | 3.6941  | 1641.68 | 19.6097 |
| v58 | 1665.21 | 4.745   | 1659.19 | 3.9219  |
| v59 | 1720.15 | 2.3192  | 1753.96 | 0.1013  |
| v60 | 2126.68 | 22.2727 | 3040.39 | 44.6618 |
| v61 | 2995.66 | 23.637  | 3085.19 | 16.6929 |
| v62 | 3040.28 | 36.147  | 3098.82 | 16.6792 |
| v63 | 3097.83 | 16.7219 | 3134.85 | 16.6866 |
| v64 | 3109.68 | 10.3665 | 3148.41 | 17.2268 |
| v65 | 3134.64 | 15.769  | 3164.81 | 6.5208  |
| v66 | 3145.01 | 16.8838 | 3173.22 | 24.8071 |
| v67 | 3170.91 | 18.6935 | 3189    | 3.7979  |
| v68 | 3187.53 | 2.8095  | 3195.42 | 2.245   |
| v69 | 3195.83 | 7.7433  | 3207.03 | 7.2593  |
| v70 | 3208.98 | 12.9222 | 3212.27 | 22.5357 |
| v71 | 3215.2  | 20.9038 | 3220.75 | 15.9592 |

| v72 | 3220.61        | 15.0708 | 3249.44        | 5.9259  |
|-----|----------------|---------|----------------|---------|
|     | <b>tsi10p6</b> |         | <b>tsi12p5</b> |         |
| v1  | -765.34        | 12.9557 | -827.33        | 2.8493  |
| v2  | 17.54          | 0.1122  | 38.59          | 0.1985  |
| v3  | 39.64          | 0.9318  | 69.13          | 0.2233  |
| v4  | 56.41          | 1.7895  | 75.41          | 0.8771  |
| v5  | 89.48          | 2.8518  | 116.19         | 0.1789  |
| v6  | 126.02         | 0.1612  | 196.54         | 0.1215  |
| v7  | 144.77         | 1.929   | 290.54         | 1.9904  |
| v8  | 170.47         | 0.538   | 293.8          | 0.3299  |
| v9  | 221.36         | 0.2209  | 302.84         | 0.6448  |
| v10 | 284.56         | 1.2679  | 355.38         | 0.5241  |
| v11 | 303.09         | 1.3568  | 405.58         | 1.5163  |
| v12 | 319.85         | 2.8068  | 418.52         | 1.1997  |
| v13 | 391.52         | 1.1128  | 427.65         | 1.28    |
| v14 | 414.27         | 5.1167  | 489.36         | 1.1737  |
| v15 | 416.15         | 0.0906  | 526.46         | 14.1724 |
| v16 | 458.25         | 22.7946 | 571.12         | 3.8016  |
| v17 | 494.15         | 5.5854  | 573.27         | 2.6787  |
| v18 | 519.19         | 12.3717 | 637.65         | 0.0915  |
| v19 | 556            | 1.9423  | 658.89         | 0.1685  |
| v20 | 579.52         | 2.6756  | 724.79         | 2.507   |
| v21 | 637.81         | 5.0771  | 727.32         | 36.6945 |
| v22 | 649.55         | 6.9691  | 751.47         | 4.5582  |
| v23 | 716.77         | 33.4856 | 796.44         | 47.7157 |
| v24 | 742.84         | 2.486   | 828.69         | 0.2356  |
| v25 | 760.4          | 0.8726  | 856.45         | 15.5469 |
| v26 | 789.82         | 45.6051 | 878.6          | 0.0922  |
| v27 | 811.23         | 3.526   | 889.62         | 4.3187  |
| v28 | 872.91         | 0.0676  | 957.34         | 1.7407  |
| v29 | 879.86         | 9.0733  | 997.8          | 1.2547  |
| v30 | 957.02         | 2.782   | 1012.94        | 0.3155  |
| v31 | 969.49         | 45.1026 | 1013.86        | 0.5901  |
| v32 | 999.77         | 0.1989  | 1022.94        | 5.1751  |
| v33 | 1012.72        | 0.0028  | 1028.91        | 0.9474  |
| v34 | 1025.54        | 0.1694  | 1031.83        | 0.6627  |
| v35 | 1032.9         | 0.0225  | 1040.8         | 5.1617  |
| v36 | 1038.42        | 0.3519  | 1052.66        | 0.2846  |
| v37 | 1049.82        | 8.5002  | 1072.7         | 5.5003  |
| v38 | 1065.25        | 2.7362  | 1076.21        | 2.4743  |
| v39 | 1073.6         | 1.5446  | 1120.74        | 4.5541  |
| v40 | 1099.42        | 11.0646 | 1145.53        | 5.256   |
| v41 | 1115.39        | 5.48    | 1190.63        | 0.0353  |

|                 |          |         |                  |         |
|-----------------|----------|---------|------------------|---------|
| v42             | 1191.37  | 0.0645  | 1215.82          | 1.6235  |
| v43             | 1212.62  | 0.2262  | 1224.37          | 0.0482  |
| v44             | 1261.88  | 2.814   | 1244.48          | 1.4455  |
| v45             | 1310.98  | 4.818   | 1299.59          | 2.7406  |
| v46             | 1317.72  | 0.2749  | 1317.82          | 0.5127  |
| v47             | 1339.51  | 0.4009  | 1327.76          | 1.1498  |
| v48             | 1362.42  | 0.4779  | 1350.32          | 0.667   |
| v49             | 1389.79  | 0.9424  | 1368.7           | 1.4113  |
| v50             | 1425.64  | 1.7899  | 1423.45          | 0.4192  |
| v51             | 1465.87  | 11.0601 | 1438.33          | 3.1685  |
| v52             | 1487.74  | 8.2479  | 1491.84          | 11.7383 |
| v53             | 1492.18  | 5.3136  | 1494.62          | 4.6197  |
| v54             | 1506.28  | 3.416   | 1505.3           | 4.6591  |
| v55             | 1543.44  | 26.756  | 1540.47          | 49.5468 |
| v56             | 1642.66  | 1.8653  | 1571.22          | 9.4536  |
| v57             | 1668.44  | 24.4489 | 1615.69          | 2.938   |
| v58             | 1677.02  | 3.1919  | 1655.32          | 1.5666  |
| v59             | 1723.17  | 2.8924  | 1672.9           | 1.7139  |
| v60             | 2247.34  | 8.3409  | 1680.47          | 7.7707  |
| v61             | 3048.13  | 34.4286 | 3050.48          | 32.6157 |
| v62             | 3107.44  | 12.0402 | 3113.49          | 13.8427 |
| v63             | 3144.42  | 14.4009 | 3137.87          | 14.2122 |
| v64             | 3164.68  | 5.08    | 3182.88          | 13.6343 |
| v65             | 3188.8   | 11.1282 | 3186.99          | 4.9917  |
| v66             | 3190.02  | 4.9513  | 3188.99          | 8.3374  |
| v67             | 3193.91  | 1.4663  | 3192.29          | 2.3262  |
| v68             | 3202.46  | 2.7949  | 3200.98          | 5.332   |
| v69             | 3212.27  | 11.3641 | 3204             | 8.9733  |
| v70             | 3219.36  | 15.4996 | 3206.52          | 1.0886  |
| v71             | 3225.12  | 10.7756 | 3209.14          | 27.3085 |
| v72             | 3251.5   | 8.428   | 3219.26          | 18.1171 |
| <b>tsi23i25</b> |          |         | <b>tsi25p11'</b> |         |
| v1              | -2289.69 | 49.5285 | -493.52          | 78.1518 |
| v2              | 33       | 0.1385  | 43.74            | 0.2881  |
| v3              | 48.78    | 0.4495  | 75.09            | 1.4931  |
| v4              | 84.84    | 0.7226  | 92.03            | 0.1379  |
| v5              | 142.58   | 1.0035  | 124.81           | 0.4554  |
| v6              | 172.85   | 0.2196  | 168.24           | 1.1692  |
| v7              | 234.95   | 0.3587  | 211.02           | 0.7637  |
| v8              | 258.32   | 0.5492  | 231.88           | 5.9247  |
| v9              | 326.49   | 0.5534  | 243.13           | 5.8873  |
| v10             | 374.61   | 2.7705  | 289.16           | 5.2763  |
| v11             | 387.67   | 4.6101  | 310.81           | 0.337   |

|     |         |         |         |         |
|-----|---------|---------|---------|---------|
| v12 | 417.64  | 0.0054  | 363.31  | 3.6919  |
| v13 | 468.35  | 1.8068  | 404.91  | 4.4953  |
| v14 | 510     | 4.5575  | 423.81  | 1.1853  |
| v15 | 534.68  | 4.7767  | 518     | 2.5874  |
| v16 | 604.31  | 7.7768  | 600.24  | 7.8124  |
| v17 | 635.31  | 3.5759  | 618.78  | 13.0559 |
| v18 | 655.46  | 27.2657 | 631.63  | 4.9098  |
| v19 | 709.29  | 12.7323 | 639.67  | 0.1698  |
| v20 | 718.23  | 40.1302 | 665.48  | 14.5498 |
| v21 | 787.28  | 21.7837 | 725.23  | 30.3756 |
| v22 | 811.22  | 6.1298  | 749.59  | 28.9444 |
| v23 | 834.38  | 10.4527 | 763.66  | 13.163  |
| v24 | 858.29  | 4.1896  | 803.14  | 6.3286  |
| v25 | 871.39  | 0.1603  | 860.12  | 8.1047  |
| v26 | 909.39  | 28.5895 | 865     | 21.6721 |
| v27 | 936.21  | 10.6325 | 881.84  | 2.2174  |
| v28 | 952.71  | 3.4375  | 927.82  | 0.3184  |
| v29 | 959.96  | 7.5992  | 929.38  | 13.1996 |
| v30 | 1004.21 | 5.6824  | 947.78  | 31.5354 |
| v31 | 1009.55 | 0.0354  | 961.05  | 1.5714  |
| v32 | 1023.91 | 0.365   | 973.48  | 12.444  |
| v33 | 1027.73 | 0.0405  | 1012.76 | 20.8422 |
| v34 | 1054.28 | 4.3294  | 1019.24 | 2.4286  |
| v35 | 1055.76 | 8.2745  | 1028.81 | 0.9466  |
| v36 | 1062.66 | 1.6088  | 1035.93 | 0.0929  |
| v37 | 1112.6  | 7.2828  | 1062.7  | 1.2325  |
| v38 | 1132.96 | 4.8822  | 1066.68 | 3.582   |
| v39 | 1142.79 | 17.3943 | 1107.02 | 9.8187  |
| v40 | 1187.33 | 0.1088  | 1120.73 | 5.4334  |
| v41 | 1194.08 | 0.2752  | 1165.67 | 3.1089  |
| v42 | 1200.52 | 1.5064  | 1191.22 | 0.0393  |
| v43 | 1208.37 | 0.7972  | 1213.85 | 4.553   |
| v44 | 1239    | 1.0681  | 1219.39 | 5.6995  |
| v45 | 1289.77 | 5.2254  | 1257.69 | 1.8887  |
| v46 | 1308.85 | 1.7484  | 1303.1  | 17.4527 |
| v47 | 1318.24 | 2.0456  | 1335.17 | 9.9949  |
| v48 | 1338.64 | 3.3726  | 1367.21 | 2.2989  |
| v49 | 1358.17 | 0.2897  | 1387.56 | 9.1389  |
| v50 | 1421.69 | 1.2859  | 1411.3  | 13.2304 |
| v51 | 1478.09 | 3.6673  | 1422.15 | 15.7095 |
| v52 | 1484.2  | 9.9794  | 1484.84 | 5.8859  |
| v53 | 1488.32 | 3.9604  | 1490.92 | 21.2874 |
| v54 | 1490.6  | 9.9542  | 1498.72 | 9.2014  |

|     |         |         |         |         |
|-----|---------|---------|---------|---------|
| v55 | 1531.38 | 17.9276 | 1543.32 | 2.863   |
| v56 | 1637.29 | 2.7869  | 1558.04 | 30.5087 |
| v57 | 1650.27 | 8.6301  | 1649.37 | 42.6669 |
| v58 | 1661.38 | 11.0019 | 1651.49 | 5.4437  |
| v59 | 1697.54 | 3.6241  | 1679.89 | 1.0083  |
| v60 | 1828.62 | 22.1609 | 1731.34 | 81.3026 |
| v61 | 3032.51 | 14.9874 | 3040.73 | 27.9241 |
| v62 | 3035.55 | 53.8772 | 3097.43 | 12.0614 |
| v63 | 3089.13 | 15.7773 | 3138.35 | 12.0624 |
| v64 | 3101.02 | 13.0442 | 3157.48 | 10.0702 |
| v65 | 3120.66 | 14.474  | 3187.55 | 3.6876  |
| v66 | 3134.38 | 18.2032 | 3195.36 | 0.3572  |
| v67 | 3187.39 | 3.4328  | 3206.02 | 15.1093 |
| v68 | 3194.07 | 0.6536  | 3216.56 | 20.8225 |
| v69 | 3204.07 | 7.4344  | 3221.77 | 4.8055  |
| v70 | 3210.45 | 25.7124 | 3223.91 | 8.3924  |
| v71 | 3211.47 | 23.413  | 3247.77 | 11.2055 |
| v72 | 3219.39 | 16.5914 | 3262.84 | 3.1286  |

|     | p3     |         | p4     |         |
|-----|--------|---------|--------|---------|
| v1  | 26.92  | 0.2226  | 21.25  | 0.0458  |
| v2  | 60.13  | 0.069   | 42.76  | 0.2221  |
| v3  | 91.59  | 0.7995  | 45.79  | 0.1063  |
| v4  | 114.13 | 0.2022  | 93.59  | 1.0772  |
| v5  | 217.38 | 1.5718  | 131.87 | 0.5009  |
| v6  | 257.72 | 0.0788  | 213.62 | 0.1501  |
| v7  | 301.04 | 0.0498  | 225.72 | 0       |
| v8  | 335.1  | 0.1982  | 251.8  | 2.2667  |
| v9  | 403.73 | 0.6735  | 335.63 | 1.0111  |
| v10 | 423.19 | 0.2267  | 338.96 | 6.1639  |
| v11 | 463.05 | 3.9617  | 413.71 | 0.0007  |
| v12 | 522.69 | 2.9575  | 426.72 | 3.2661  |
| v13 | 544.44 | 1.9091  | 434.68 | 2.0619  |
| v14 | 600.58 | 3.9704  | 452.9  | 9.6984  |
| v15 | 637.01 | 4.033   | 545.82 | 11.8899 |
| v16 | 642.25 | 1.597   | 545.93 | 1.0964  |
| v17 | 728.28 | 33.1282 | 592.06 | 0.0726  |
| v18 | 732.89 | 18.4405 | 638.89 | 0.0133  |
| v19 | 735.74 | 2.0571  | 701.56 | 4.3019  |
| v20 | 786.95 | 57.9564 | 708.41 | 22.3483 |
| v21 | 826.01 | 10.7578 | 711.78 | 13.3499 |
| v22 | 878.2  | 0.4872  | 751.99 | 0.7712  |
| v23 | 885.3  | 2.6866  | 779.78 | 38.0718 |
| v24 | 925.12 | 2.8622  | 811.33 | 13.1121 |



|     |         |         |         |         |
|-----|---------|---------|---------|---------|
| v25 | 942.42  | 2.2623  | 831.63  | 0.226   |
| v26 | 964.8   | 1.3596  | 858.12  | 0.0433  |
| v27 | 1012.95 | 0.341   | 926.21  | 41.9461 |
| v28 | 1016.33 | 1.0304  | 939.42  | 3.6476  |
| v29 | 1018.35 | 0.1457  | 961.92  | 0.3727  |
| v30 | 1026.36 | 0.3163  | 989.57  | 0.0096  |
| v31 | 1030.62 | 0.0365  | 998.11  | 0.6268  |
| v32 | 1030.84 | 0.1129  | 1008.78 | 0.0725  |
| v33 | 1062.97 | 3.9755  | 1012.42 | 0.7232  |
| v34 | 1073.2  | 7.2114  | 1022.46 | 0.4064  |
| v35 | 1092.02 | 1.7275  | 1048.96 | 0.2836  |
| v36 | 1119.3  | 4.9692  | 1056.59 | 10.6124 |
| v37 | 1136.74 | 4.757   | 1073.91 | 0.8991  |
| v38 | 1190.06 | 0.0201  | 1103.41 | 4.7013  |
| v39 | 1206.07 | 0.1175  | 1185.19 | 0.0133  |
| v40 | 1219.83 | 0.4515  | 1203.26 | 0.003   |
| v41 | 1229.22 | 0.196   | 1242.84 | 7.6447  |
| v42 | 1305.03 | 0.5435  | 1304.11 | 1.999   |
| v43 | 1327    | 0.2031  | 1310.54 | 0.0545  |
| v44 | 1336.23 | 0.2931  | 1347.42 | 3.0973  |
| v45 | 1357.71 | 0.0647  | 1358.2  | 0.2701  |
| v46 | 1368.85 | 0.9995  | 1413.56 | 0.0897  |
| v47 | 1423.22 | 1.1683  | 1429.65 | 4.551   |
| v48 | 1462.46 | 3.1495  | 1465.08 | 2.8494  |
| v49 | 1493.97 | 7.7101  | 1478.15 | 4.6142  |
| v50 | 1497.32 | 7.7703  | 1482.27 | 8.8188  |
| v51 | 1512.96 | 10.478  | 1499.09 | 24.7781 |
| v52 | 1536.47 | 33.3039 | 1528.99 | 33.7506 |
| v53 | 1558.81 | 0.9362  | 1607.75 | 2.2283  |
| v54 | 1649.99 | 8.1734  | 1625.78 | 9.1134  |
| v55 | 1664.95 | 3.692   | 1645.13 | 3.5758  |
| v56 | 1681.74 | 22.4285 | 1667.4  | 10.1573 |
| v57 | 1685.78 | 9.1444  | 2280.37 | 1.0679  |
| v58 | 3049.66 | 28.9877 | 3035.97 | 9.9977  |
| v59 | 3114.07 | 15.1553 | 3088.81 | 10.027  |
| v60 | 3136.16 | 14.033  | 3108.13 | 22.4538 |
| v61 | 3183.04 | 5.9383  | 3123.44 | 4.696   |
| v62 | 3183.77 | 8.1328  | 3137.8  | 5.5778  |
| v63 | 3187.23 | 4.0945  | 3151.95 | 20.4553 |
| v64 | 3192.21 | 1.1883  | 3165.45 | 2.3747  |
| v65 | 3196.54 | 16.4195 | 3173.74 | 5.2105  |
| v66 | 3202.09 | 5.1402  | 3185.31 | 16.3185 |
| v67 | 3208.85 | 23.7857 | 3192.49 | 18.833  |

|     |            |         |           |         |
|-----|------------|---------|-----------|---------|
| v68 | 3212.73    | 19.8705 | 3196.69   | 9.8137  |
| v69 | 3219.41    | 15.3584 | 3220.69   | 11.916  |
|     | <b>p11</b> |         | <b>p5</b> |         |
| v1  | 50.39      | 0.3201  | 40.21     | 0.212   |
| v2  | 59.62      | 0.5667  | 70.92     | 0.7583  |
| v3  | 105.36     | 0.1305  | 71.56     | 0.0254  |
| v4  | 146.94     | 0.3923  | 109.3     | 0.2164  |
| v5  | 177.9      | 0.2811  | 198       | 0.0914  |
| v6  | 224.99     | 0.7738  | 292.9     | 0.0266  |
| v7  | 281.92     | 0.4219  | 297.24    | 0.1799  |
| v8  | 294.69     | 0.5037  | 357.27    | 0.3859  |
| v9  | 366.28     | 1.0364  | 415.51    | 2.7538  |
| v10 | 380        | 2.9461  | 420.55    | 0.4109  |
| v11 | 424.37     | 1.2096  | 428.6     | 0.0521  |
| v12 | 513.14     | 14.5239 | 519.51    | 14.3608 |
| v13 | 598.41     | 9.1103  | 566.74    | 4.3421  |
| v14 | 600.2      | 10.4505 | 574.23    | 2.9243  |
| v15 | 636.69     | 0.1816  | 637.69    | 0.0353  |
| v16 | 651.58     | 10.1974 | 663       | 0.4087  |
| v17 | 673.04     | 7.8269  | 724.67    | 1.9737  |
| v18 | 724.23     | 28.6076 | 728.18    | 40.0671 |
| v19 | 742.52     | 25.3525 | 750.28    | 1.7897  |
| v20 | 763.33     | 0.6124  | 791.27    | 50.7523 |
| v21 | 800.45     | 22.5621 | 830.56    | 0.0397  |
| v22 | 836.86     | 26.1693 | 858.93    | 22.6384 |
| v23 | 857.26     | 11.6861 | 871.49    | 0.2369  |
| v24 | 880.39     | 0.155   | 877.81    | 0.0646  |
| v25 | 924.09     | 6.7705  | 955.86    | 1.7815  |
| v26 | 934.56     | 11.7935 | 992.53    | 1.0442  |
| v27 | 942.63     | 24.1442 | 1008.54   | 0.5211  |
| v28 | 964.72     | 3.0636  | 1012.55   | 0.0975  |
| v29 | 973.54     | 9.5891  | 1016.93   | 0.027   |
| v30 | 1016.56    | 12.6612 | 1028.77   | 0.1516  |
| v31 | 1018.43    | 11.0367 | 1030.03   | 0.0946  |
| v32 | 1028.43    | 0.1553  | 1036.8    | 7.4308  |
| v33 | 1034.99    | 0.3585  | 1057.91   | 0.3527  |
| v34 | 1065.98    | 4.5037  | 1073.26   | 11.4367 |
| v35 | 1069.31    | 2.8585  | 1079.55   | 1.4161  |
| v36 | 1112.49    | 3.6263  | 1118.72   | 4.5524  |
| v37 | 1123.59    | 12.1581 | 1154.04   | 5.8399  |
| v38 | 1175.82    | 3.9114  | 1189.6    | 0.0552  |
| v39 | 1190.34    | 0.4375  | 1217.23   | 1.1914  |
| v40 | 1205.36    | 5.0654  | 1226.73   | 1.5326  |

|     |         |         |         |         |
|-----|---------|---------|---------|---------|
| v41 | 1218.37 | 2.0506  | 1251.52 | 1.193   |
| v42 | 1258.84 | 0.0431  | 1302.65 | 1.1088  |
| v43 | 1305.81 | 7.3287  | 1323.55 | 0.07    |
| v44 | 1335.2  | 0.1476  | 1327.98 | 0.0658  |
| v45 | 1366.36 | 2.7313  | 1353.57 | 0.3277  |
| v46 | 1375.67 | 39.215  | 1367.71 | 0.6494  |
| v47 | 1421.18 | 13.8832 | 1423.51 | 0.2723  |
| v48 | 1425.48 | 0.6326  | 1451.79 | 2.2523  |
| v49 | 1486.73 | 6.6155  | 1492.57 | 11.1498 |
| v50 | 1494.71 | 5.7987  | 1497.35 | 6.2644  |
| v51 | 1499.03 | 15.8985 | 1506.29 | 3.7074  |
| v52 | 1546.1  | 5.1334  | 1542.56 | 42.0748 |
| v53 | 1583.88 | 52.8158 | 1577.74 | 11.6915 |
| v54 | 1650.14 | 3.0704  | 1637.3  | 2.1915  |
| v55 | 1678.75 | 2.2816  | 1659.37 | 0.8206  |
| v56 | 1690.99 | 2.208   | 1682    | 8.8229  |
| v57 | 1730.64 | 67.7199 | 1694.53 | 1.9921  |
| v58 | 3040.3  | 38.2521 | 3047.97 | 34.2017 |
| v59 | 3096.14 | 16.8939 | 3112.22 | 16.2052 |
| v60 | 3134.43 | 17.8785 | 3135.42 | 14.371  |
| v61 | 3155.63 | 10.2204 | 3180.94 | 18.9724 |
| v62 | 3186.69 | 4.0382  | 3181.12 | 12.3309 |
| v63 | 3194.86 | 0.2772  | 3186.65 | 2.4457  |
| v64 | 3205.44 | 15.5499 | 3191.55 | 1.2848  |
| v65 | 3215.84 | 24.947  | 3200.68 | 6.5126  |
| v66 | 3219.01 | 7.6782  | 3201.18 | 17.4412 |
| v67 | 3223.53 | 8.3719  | 3204.25 | 1.8912  |
| v68 | 3230.46 | 7.9605  | 3208.56 | 29.7218 |
| v69 | 3265.1  | 2.8343  | 3218.95 | 16.4415 |

---

|     | p6     |        | p11'   |        |
|-----|--------|--------|--------|--------|
| v1  | 16.62  | 0.004  | 44.29  | 0.1711 |
| v2  | 41.85  | 0.4418 | 77.05  | 0.4352 |
| v3  | 58     | 1.5572 | 89.6   | 0.1946 |
| v4  | 127.78 | 0.0357 | 142.5  | 0.7272 |
| v5  | 133.06 | 0.3011 | 177.2  | 1.2215 |
| v6  | 165.25 | 0.0058 | 216.73 | 0.7487 |
| v7  | 221.69 | 0.1236 | 269.99 | 1.7708 |
| v8  | 294.69 | 1.548  | 310.07 | 0.4668 |
| v9  | 307.3  | 0.6676 | 361.5  | 3.5915 |
| v10 | 322.04 | 0.1155 | 398.2  | 1.0725 |
| v11 | 385.87 | 1.9598 | 422.14 | 0.8643 |
| v12 | 406.81 | 8.5279 | 518.36 | 4.1243 |
| v13 | 417.11 | 0.0491 | 600.08 | 8.4806 |

|     |         |         |         |         |
|-----|---------|---------|---------|---------|
| v14 | 480.75  | 0.0998  | 613.89  | 12.7873 |
| v15 | 514.67  | 6.2609  | 630.65  | 5.3636  |
| v16 | 550.21  | 0.4835  | 639.55  | 0.0869  |
| v17 | 567.29  | 8.5719  | 661.24  | 16.5562 |
| v18 | 630.45  | 4.6837  | 722.46  | 30.4484 |
| v19 | 644.82  | 0.9236  | 746.06  | 29.6549 |
| v20 | 719.17  | 34.3546 | 751.25  | 9.842   |
| v21 | 742.57  | 1.5463  | 802.34  | 9.1211  |
| v22 | 767.36  | 0.0825  | 846.58  | 28.4522 |
| v23 | 791.45  | 41.2517 | 860.46  | 7.5987  |
| v24 | 809.38  | 3.4493  | 878.27  | 0.856   |
| v25 | 874.38  | 1.7871  | 923.98  | 2.1267  |
| v26 | 877.05  | 7.8968  | 927.53  | 13.0004 |
| v27 | 957.97  | 2.6571  | 948.14  | 31.4324 |
| v28 | 966.87  | 46.4696 | 958.31  | 2.0179  |
| v29 | 1000.9  | 0.3798  | 971.24  | 13.0873 |
| v30 | 1012.59 | 0.006   | 1014.15 | 9.8043  |
| v31 | 1027.01 | 0.0851  | 1018.43 | 13.5283 |
| v32 | 1032.19 | 0.0388  | 1028.37 | 0.5894  |
| v33 | 1041.62 | 0.2661  | 1034.12 | 0.1928  |
| v34 | 1050.05 | 9.8711  | 1064.97 | 4.05    |
| v35 | 1066.45 | 2.6172  | 1068.35 | 2.9505  |
| v36 | 1074.04 | 1.4078  | 1106.48 | 9.0917  |
| v37 | 1101.3  | 12.2305 | 1116.21 | 5.7026  |
| v38 | 1114.78 | 5.2856  | 1162.19 | 2.3345  |
| v39 | 1190.42 | 0.0473  | 1190.54 | 0.0226  |
| v40 | 1213.27 | 0.0882  | 1211.58 | 8.104   |
| v41 | 1259.78 | 5.5592  | 1214.64 | 2.1564  |
| v42 | 1313.5  | 12.194  | 1256.56 | 1.6983  |
| v43 | 1317.27 | 0.1261  | 1299.94 | 16.4037 |
| v44 | 1341.18 | 0.7133  | 1335.47 | 10.1992 |
| v45 | 1362.11 | 0.3044  | 1363.37 | 2.3158  |
| v46 | 1389.16 | 2.7346  | 1383.9  | 9.2912  |
| v47 | 1427.06 | 1.4777  | 1415.5  | 11.1709 |
| v48 | 1466.17 | 10.1397 | 1426.85 | 19.1648 |
| v49 | 1488.63 | 8.5886  | 1485.98 | 6.2804  |
| v50 | 1492.7  | 4.9871  | 1493.58 | 17.3639 |
| v51 | 1506.94 | 4.0418  | 1499.02 | 10.4273 |
| v52 | 1546.37 | 33.7314 | 1544.88 | 3.432   |
| v53 | 1646.21 | 1.8074  | 1587.74 | 56.3572 |
| v54 | 1670.21 | 25.2407 | 1649.76 | 3.2793  |
| v55 | 1683.75 | 2.2963  | 1679.12 | 2.1162  |
| v56 | 1723.77 | 4.1291  | 1684.94 | 18.282  |

|     |         |         |         |         |
|-----|---------|---------|---------|---------|
| v57 | 2343.87 | 1.1349  | 1729.7  | 64.5388 |
| v58 | 3046.58 | 38.7073 | 3040.16 | 33.719  |
| v59 | 3105.43 | 12.6861 | 3096.08 | 15.9816 |
| v60 | 3142.16 | 14.9718 | 3135.55 | 13.9857 |
| v61 | 3164.32 | 4.7995  | 3156.5  | 10.4827 |
| v62 | 3175.21 | 17.4965 | 3186.57 | 4.0635  |
| v63 | 3185.54 | 2.6019  | 3194.4  | 0.258   |
| v64 | 3192.56 | 1.6207  | 3204.98 | 14.4682 |
| v65 | 3201.27 | 2.6764  | 3214.82 | 18.6648 |
| v66 | 3211.12 | 13.0002 | 3219.51 | 5.5635  |
| v67 | 3218.31 | 18.3383 | 3221.99 | 12.4187 |
| v68 | 3224.07 | 10.7603 | 3246.19 | 13.1693 |
| v69 | 3251.04 | 8.7662  | 3251.69 | 2.0546  |

|     | vdW(i5) |         | vdW(i9) |         |
|-----|---------|---------|---------|---------|
| v1  | 11.55   | 1.16    | 5.88    | 1.0173  |
| v2  | 28.65   | 4.2068  | 33.84   | 3.1669  |
| v3  | 43.13   | 0.0656  | 41.99   | 0.9683  |
| v4  | 64.01   | 0.0484  | 51.31   | 0.6373  |
| v5  | 75.01   | 1.7722  | 71.69   | 1.0568  |
| v6  | 85.86   | 2.7013  | 82.39   | 3.0619  |
| v7  | 131.19  | 18.0257 | 127.19  | 19.5925 |
| v8  | 146.81  | 4.2527  | 148.44  | 4.2041  |
| v9  | 177.17  | 0.7694  | 174.49  | 0.8945  |
| v10 | 232.5   | 0.3254  | 226.7   | 0.6325  |
| v11 | 279.76  | 49.4071 | 276.03  | 51.5272 |
| v12 | 292.76  | 0.6754  | 293.16  | 0.7904  |
| v13 | 393.47  | 0.127   | 395.7   | 0.3663  |
| v14 | 419.75  | 12.4172 | 416.6   | 12.3091 |
| v15 | 437.14  | 1.2653  | 436.95  | 1.1497  |
| v16 | 479.56  | 3.5657  | 479.34  | 2.845   |
| v17 | 495.16  | 31.1299 | 495.67  | 31.0126 |
| v18 | 511.42  | 0.5737  | 512.06  | 0.5583  |
| v19 | 541.45  | 0.1843  | 541.67  | 0.1338  |
| v20 | 631.04  | 0.174   | 630.91  | 0.229   |
| v21 | 656.69  | 0.0311  | 650.53  | 1.0562  |
| v22 | 691.9   | 50.731  | 696.22  | 49.4382 |
| v23 | 789.03  | 1.4778  | 788.7   | 1.3908  |
| v24 | 797.45  | 30.4581 | 797.19  | 1.5584  |
| v25 | 799.68  | 4.6481  | 798.56  | 33.4921 |
| v26 | 801.14  | 1.0921  | 801.73  | 0.5543  |
| v27 | 865.76  | 1.5032  | 870.97  | 1.148   |
| v28 | 948.1   | 48.476  | 955.72  | 16.5918 |
| v29 | 961.53  | 53.3355 | 956.63  | 90.6705 |

|     |         |          |         |         |
|-----|---------|----------|---------|---------|
| v30 | 975.21  | 0.3148   | 973.77  | 0.4848  |
| v31 | 978.84  | 1.6062   | 983.91  | 2.9371  |
| v32 | 1019.66 | 4.75     | 1018.17 | 0.9295  |
| v33 | 1019.99 | 1.5632   | 1019.59 | 5.2457  |
| v34 | 1021.58 | 0.2901   | 1025.19 | 0.4274  |
| v35 | 1041.78 | 0.1691   | 1043.45 | 0.0665  |
| v36 | 1053.34 | 3.6339   | 1052.79 | 18.0937 |
| v37 | 1053.87 | 19.8484  | 1053.78 | 0.5604  |
| v38 | 1077.34 | 0.4508   | 1076.26 | 0.1758  |
| v39 | 1098.44 | 2.4225   | 1098.63 | 2.7352  |
| v40 | 1116.91 | 3.7683   | 1117.32 | 4.3503  |
| v41 | 1188    | 71.9453  | 1187.96 | 67.4685 |
| v42 | 1190.46 | 5.567    | 1191.13 | 5.3764  |
| v43 | 1231.81 | 21.7522  | 1232.04 | 20.3405 |
| v44 | 1326.35 | 4.9174   | 1326.79 | 5.5305  |
| v45 | 1342.38 | 0.4205   | 1338.21 | 0.2893  |
| v46 | 1343.5  | 0.4271   | 1343.29 | 0.4993  |
| v47 | 1359.22 | 6.6053   | 1360.08 | 7.407   |
| v48 | 1418.82 | 12.1538  | 1417.36 | 13.3663 |
| v49 | 1443.97 | 4.8391   | 1445.28 | 5.0266  |
| v50 | 1466.63 | 2.9256   | 1467.56 | 0.9085  |
| v51 | 1482.78 | 11.2111  | 1483.67 | 11.6631 |
| v52 | 1488.44 | 8.6051   | 1488.62 | 6.7989  |
| v53 | 1510.98 | 5.669    | 1511.47 | 5.372   |
| v54 | 1514.68 | 3.0667   | 1515.36 | 1.8631  |
| v55 | 1614.85 | 0.7483   | 1615.23 | 0.5891  |
| v56 | 1639.79 | 109.7082 | 1640.65 | 101.725 |
| v57 | 1690.46 | 22.5392  | 1690.97 | 20.3703 |
| v58 | 1740.21 | 2.2897   | 1740.24 | 2.772   |
| v59 | 1993.45 | 26.0733  | 1995.45 | 25.3676 |
| v60 | 3046.08 | 17.8898  | 3041.94 | 19.2858 |
| v61 | 3104.9  | 19.0999  | 3100.46 | 18.2895 |
| v62 | 3139.44 | 13.9334  | 3139.86 | 15.1421 |
| v63 | 3152.98 | 2.9939   | 3152.43 | 3.5745  |
| v64 | 3158.88 | 6.4955   | 3158.08 | 4.6923  |
| v65 | 3168.45 | 0.8675   | 3168.51 | 2.4453  |
| v66 | 3198.89 | 0.3534   | 3199.13 | 0.3647  |
| v67 | 3211.63 | 3.8672   | 3211.73 | 4.0905  |
| v68 | 3219.11 | 6.1793   | 3219.32 | 6.0984  |
| v69 | 3230.02 | 4.6763   | 3230.31 | 4.5362  |
| v70 | 3236.37 | 2.6686   | 3236.05 | 3.109   |
| v71 | 3240.59 | 5.7641   | 3240.82 | 6.1373  |
| v72 | 3248.43 | 6.892    | 3247.37 | 8.5641  |

|     | <b>tsi5vdW</b> |         | <b>tsi9vdW</b> |         |
|-----|----------------|---------|----------------|---------|
| v1  | -17.64         | 0.9989  | -25.53         | 1.4284  |
| v2  | 28             | 0.8567  | 31.69          | 0.6796  |
| v3  | 44.8           | 0.1565  | 47.87          | 0.5752  |
| v4  | 55.44          | 0.973   | 67.03          | 0.036   |
| v5  | 74.9           | 0.5693  | 78.85          | 0.2179  |
| v6  | 83.74          | 2.6363  | 95.94          | 0.8178  |
| v7  | 116.92         | 23.4713 | 124.63         | 22.9512 |
| v8  | 148.34         | 4.1836  | 147.72         | 4.3232  |
| v9  | 173.96         | 0.0515  | 176.42         | 1.5456  |
| v10 | 229.88         | 0.0388  | 225.64         | 0.0857  |
| v11 | 261.3          | 39.3646 | 258.27         | 37.5201 |
| v12 | 292.8          | 0.2877  | 290.21         | 0.5596  |
| v13 | 391.69         | 0.1291  | 393.96         | 0.225   |
| v14 | 420.25         | 15.3158 | 417.22         | 13.4937 |
| v15 | 436.82         | 1.3505  | 436.66         | 1.3106  |
| v16 | 477.67         | 2.4002  | 477.14         | 1.993   |
| v17 | 490.57         | 25.6252 | 490.4          | 25.972  |
| v18 | 512.82         | 0.6085  | 512.64         | 0.6334  |
| v19 | 541.19         | 0.2419  | 539.97         | 0.1711  |
| v20 | 632.4          | 0.1782  | 632.2          | 0.1777  |
| v21 | 656.8          | 0.4217  | 658.69         | 1.1577  |
| v22 | 693.4          | 51.7369 | 694.36         | 51.2987 |
| v23 | 788.44         | 0.3506  | 788.01         | 0.2227  |
| v24 | 794.84         | 14.1125 | 796.26         | 19.8642 |
| v25 | 798.13         | 13.5241 | 799            | 6.6196  |
| v26 | 802.18         | 0.5822  | 801.67         | 0.2007  |
| v27 | 867.15         | 1.184   | 867.77         | 0.7956  |
| v28 | 944.07         | 47.3965 | 957.23         | 45.4111 |
| v29 | 968.9          | 59.8998 | 962.87         | 65.5904 |
| v30 | 974.12         | 1.3436  | 971.85         | 3.8118  |
| v31 | 978.3          | 0.4104  | 979.14         | 1.714   |
| v32 | 1019.16        | 0.3094  | 1016.57        | 0.3172  |
| v33 | 1020.3         | 4.8132  | 1020.24        | 4.1073  |
| v34 | 1021.36        | 0.1632  | 1022           | 0.2135  |
| v35 | 1041.6         | 0.0601  | 1042.02        | 0.0234  |
| v36 | 1051.64        | 21.4022 | 1048.56        | 17.7397 |
| v37 | 1054.67        | 0.5322  | 1054.27        | 0.4258  |
| v38 | 1076.65        | 0.3478  | 1077.08        | 0.1536  |
| v39 | 1097.83        | 1.713   | 1095.92        | 2.5622  |
| v40 | 1115.69        | 4.0746  | 1115.88        | 4.4617  |
| v41 | 1185.26        | 70.0562 | 1184.82        | 64.4496 |
| v42 | 1191.28        | 2.5531  | 1191.17        | 2.8942  |

|     |         |         |         |         |
|-----|---------|---------|---------|---------|
| v43 | 1229.57 | 20.7708 | 1229.33 | 20.8066 |
| v44 | 1326.04 | 4.1719  | 1326.31 | 5.0678  |
| v45 | 1338.27 | 1.1016  | 1335.43 | 0.3526  |
| v46 | 1343.42 | 0.2841  | 1342.78 | 0.5379  |
| v47 | 1358.37 | 6.4168  | 1358.58 | 7.1573  |
| v48 | 1418.78 | 11.4458 | 1418.31 | 12.2295 |
| v49 | 1443.78 | 5.94    | 1443.22 | 4.9628  |
| v50 | 1466.41 | 4.3473  | 1466.16 | 0.6353  |
| v51 | 1484.07 | 10.8239 | 1483.99 | 10.9431 |
| v52 | 1487.81 | 9.3952  | 1488.67 | 7.1749  |
| v53 | 1510.8  | 4.2206  | 1511.11 | 4.218   |
| v54 | 1515.21 | 2.0916  | 1514.77 | 1.4481  |
| v55 | 1617.42 | 0.952   | 1617.33 | 0.5951  |
| v56 | 1641.54 | 80.3982 | 1641.5  | 72.8223 |
| v57 | 1689.85 | 18.9383 | 1689.01 | 19.7924 |
| v58 | 1738.8  | 4.7249  | 1736.85 | 8.5289  |
| v59 | 2017.26 | 20.5326 | 2021.62 | 30.6206 |
| v60 | 3047.68 | 18.2251 | 3042.82 | 19.0592 |
| v61 | 3107.07 | 18.2059 | 3100.61 | 20.3364 |
| v62 | 3139.94 | 13.2034 | 3140.67 | 14.6316 |
| v63 | 3154.41 | 2.6787  | 3156.83 | 2.5209  |
| v64 | 3160.01 | 9.2409  | 3158.88 | 4.5274  |
| v65 | 3168.23 | 0.5467  | 3168.42 | 2.563   |
| v66 | 3198.43 | 0.2759  | 3198.46 | 0.3137  |
| v67 | 3210.68 | 3.3696  | 3210.62 | 3.6321  |
| v68 | 3217.77 | 5.1727  | 3218.07 | 5.5399  |
| v69 | 3228.01 | 3.6925  | 3228.7  | 3.9697  |
| v70 | 3231.3  | 5.3675  | 3231.76 | 4.2583  |
| v71 | 3240.99 | 7.3822  | 3245.18 | 6.2835  |
| v72 | 3253.16 | 4.6457  | 3247.87 | 10.0338 |

|     | <b>i30</b> |        | <b>i31</b> |        |
|-----|------------|--------|------------|--------|
| v1  | 10.94      | 0.0063 | 25.98      | 0.3187 |
| v2  | 42.7       | 0.2243 | 42.16      | 0.2018 |
| v3  | 47.86      | 0.5465 | 54.7       | 0.1674 |
| v4  | 77.97      | 1.0421 | 81.39      | 1.0051 |
| v5  | 135.46     | 0.1506 | 129.18     | 0.6661 |
| v6  | 136.02     | 1.7627 | 180.01     | 0.0546 |
| v7  | 173.89     | 0.0672 | 206.03     | 0.1    |
| v8  | 184.89     | 0.0405 | 280.83     | 0.6027 |
| v9  | 227.7      | 0.8143 | 328.26     | 2.2643 |
| v10 | 301.46     | 1.8003 | 347.63     | 0.6592 |
| v11 | 343.9      | 1.3281 | 397.26     | 7.9364 |
| v12 | 402.55     | 1.061  | 414.42     | 0.0082 |



|     |         |         |         |         |
|-----|---------|---------|---------|---------|
| v13 | 417.59  | 0.0029  | 433.23  | 4.7166  |
| v14 | 422.48  | 1.2567  | 487.53  | 6.4856  |
| v15 | 465.11  | 17.4256 | 499.59  | 0.6018  |
| v16 | 499.39  | 24.8652 | 540.16  | 1.5996  |
| v17 | 552.02  | 13.8174 | 577.07  | 3.5689  |
| v18 | 560.45  | 4.5756  | 636.21  | 0.0133  |
| v19 | 596.47  | 6.4741  | 670.18  | 0.4694  |
| v20 | 608.23  | 6.8751  | 695.7   | 33.0983 |
| v21 | 644.84  | 0.0751  | 741.14  | 0.9284  |
| v22 | 720.73  | 35.5314 | 760.44  | 0.308   |
| v23 | 723.07  | 3.131   | 765.34  | 44.4015 |
| v24 | 761.78  | 1.9002  | 825.8   | 24.2231 |
| v25 | 792.3   | 39.4129 | 843.3   | 0.7366  |
| v26 | 814.22  | 2.4898  | 904.72  | 6.7421  |
| v27 | 876.85  | 0.0015  | 912     | 3.5778  |
| v28 | 915.74  | 0.4509  | 923.02  | 34.2676 |
| v29 | 946.37  | 42.3865 | 937.07  | 24.2138 |
| v30 | 960.04  | 3.6064  | 965.46  | 6.9357  |
| v31 | 981.23  | 0.3103  | 999.13  | 0.0214  |
| v32 | 1013.88 | 0.0025  | 1001.48 | 8.8615  |
| v33 | 1027.82 | 0.1621  | 1011.86 | 0.9343  |
| v34 | 1032.83 | 0.0714  | 1012.7  | 0.0073  |
| v35 | 1034.73 | 5.803   | 1049.26 | 7.739   |
| v36 | 1061.33 | 4.2282  | 1061.32 | 13.9979 |
| v37 | 1073.99 | 0.6947  | 1070.07 | 6.3525  |
| v38 | 1092.93 | 0.1592  | 1078.39 | 0.5613  |
| v39 | 1104.21 | 1.0208  | 1100.01 | 33.5203 |
| v40 | 1114.24 | 5.9442  | 1113.77 | 5.4187  |
| v41 | 1190.72 | 0.038   | 1121.4  | 5.2356  |
| v42 | 1213.22 | 0.1791  | 1180.76 | 0.3431  |
| v43 | 1231.49 | 3.1653  | 1200.58 | 1.5036  |
| v44 | 1277.31 | 1.5063  | 1305.22 | 0.9254  |
| v45 | 1300.9  | 4.885   | 1305.78 | 1.4026  |
| v46 | 1317.25 | 0.2211  | 1323.93 | 32.9431 |
| v47 | 1342.9  | 29.5532 | 1355.51 | 0.0802  |
| v48 | 1362.26 | 0.3385  | 1370.82 | 0.3292  |
| v49 | 1417.36 | 11.5105 | 1421.05 | 15.397  |
| v50 | 1453.74 | 0.8252  | 1457.97 | 1.9131  |
| v51 | 1459    | 0.5732  | 1472.91 | 3.9301  |
| v52 | 1481.82 | 6.9359  | 1476.67 | 1.775   |
| v53 | 1493.17 | 5.3555  | 1490.62 | 7.6035  |
| v54 | 1501.2  | 13.1862 | 1506.29 | 10.4794 |
| v55 | 1547.33 | 26.5024 | 1512.52 | 38.9925 |

|            |         |            |         |         |
|------------|---------|------------|---------|---------|
| v56        | 1648    | 1.7325     | 1597.45 | 3.69    |
| v57        | 1680.11 | 10.2169    | 1620.84 | 12.8124 |
| v58        | 1742.03 | 27.4086    | 1730.76 | 36.0928 |
| v59        | 2375.71 | 1.5506     | 1981.37 | 28.0237 |
| v60        | 3015.28 | 10.9456    | 3047.06 | 18.3797 |
| v61        | 3045.97 | 15.311     | 3105.86 | 11.7356 |
| v62        | 3106.79 | 12.1492    | 3137.06 | 16.3092 |
| v63        | 3141.66 | 20.6749    | 3145.32 | 19.4252 |
| v64        | 3152.05 | 9.2496     | 3154.81 | 6.0895  |
| v65        | 3166.51 | 13.2735    | 3163.29 | 8.5489  |
| v66        | 3192.36 | 0.8666     | 3190.13 | 4.9655  |
| v67        | 3201.13 | 3.007      | 3196.03 | 3.7185  |
| v68        | 3211.09 | 13.8539    | 3210.15 | 7.1507  |
| v69        | 3218.23 | 18.1017    | 3214.71 | 22.0997 |
| v70        | 3223.91 | 8.3797     | 3222.52 | 13.2855 |
| v71        | 3236.47 | 12.8297    | 3225.35 | 4.0905  |
| v72        | 3285.57 | 5.3822     | 3240.31 | 13.2831 |
| <b>i32</b> |         | <b>i33</b> |         |         |
| v1         | 12.23   | 0.0035     | 27.63   | 0.4253  |
| v2         | 50.17   | 0.5174     | 51.33   | 0.1923  |
| v3         | 60.35   | 0.9334     | 65      | 0.2766  |
| v4         | 96.77   | 0.2781     | 107.8   | 0.5994  |
| v5         | 141.39  | 0.5853     | 149.3   | 0.1347  |
| v6         | 155.06  | 0.8209     | 181.27  | 0.0803  |
| v7         | 164.45  | 0.2435     | 252.92  | 0.1144  |
| v8         | 234.38  | 0.4615     | 262.26  | 0.9323  |
| v9         | 267.38  | 0.0594     | 289.08  | 0.4177  |
| v10        | 311.68  | 2.3146     | 364.51  | 1.4419  |
| v11        | 338.96  | 0.2237     | 375.07  | 0.351   |
| v12        | 358.07  | 0.1426     | 414.01  | 1.7728  |
| v13        | 391.09  | 0.706      | 417.67  | 3.124   |
| v14        | 417.49  | 0.0001     | 445.46  | 3.7314  |
| v15        | 457.71  | 4.7873     | 486.27  | 9.6315  |
| v16        | 487.7   | 4.465      | 513.75  | 1.2088  |
| v17        | 545.03  | 3.3232     | 553.26  | 0.082   |
| v18        | 561.52  | 30.258     | 635.55  | 0.0196  |
| v19        | 593.08  | 31.3978    | 648.19  | 0.9618  |
| v20        | 617.07  | 3.7523     | 696.19  | 32.4566 |
| v21        | 644.69  | 0.176      | 708.17  | 3.7085  |
| v22        | 667.76  | 1.234      | 740.94  | 3.5086  |
| v23        | 711.05  | 14.8032    | 765.61  | 44.0977 |
| v24        | 720.57  | 33.6786    | 812.03  | 29.2453 |
| v25        | 792.02  | 39.2033    | 843.69  | 0.051   |

|     |         |         |         |         |
|-----|---------|---------|---------|---------|
| v26 | 815.75  | 0.0467  | 909.85  | 17.9238 |
| v27 | 876.19  | 0.0031  | 912.98  | 5.2905  |
| v28 | 914.51  | 0.5285  | 937.62  | 15.6684 |
| v29 | 959.34  | 3.3017  | 951.72  | 37.6309 |
| v30 | 968.52  | 0.2482  | 979.69  | 2.9394  |
| v31 | 978.21  | 1.137   | 992.11  | 17.0591 |
| v32 | 980.34  | 37.3929 | 999.48  | 0.0404  |
| v33 | 1013.43 | 0.0035  | 1011.13 | 0.9377  |
| v34 | 1027.96 | 0.1026  | 1012.85 | 0.013   |
| v35 | 1032.59 | 0.0661  | 1041.25 | 18.9746 |
| v36 | 1043.14 | 11.6974 | 1049.7  | 7.8438  |
| v37 | 1062.17 | 4.4875  | 1062.25 | 36.921  |
| v38 | 1065.07 | 8.8121  | 1070.47 | 10.2191 |
| v39 | 1114.17 | 5.7722  | 1104.77 | 12.7218 |
| v40 | 1175.16 | 2.613   | 1113.25 | 5.413   |
| v41 | 1190.15 | 0.0424  | 1179.77 | 0.3109  |
| v42 | 1202.7  | 3.4692  | 1189.57 | 14.2668 |
| v43 | 1213.38 | 0.364   | 1222.05 | 5.9984  |
| v44 | 1228.43 | 2.448   | 1305.3  | 0.755   |
| v45 | 1306.07 | 7.5171  | 1313.65 | 1.7881  |
| v46 | 1316.94 | 0.2381  | 1330.9  | 6.3034  |
| v47 | 1343.25 | 7.2233  | 1355.19 | 0.0428  |
| v48 | 1361.76 | 0.3601  | 1364.68 | 2.6664  |
| v49 | 1409.84 | 6.124   | 1421.69 | 5.9153  |
| v50 | 1445.72 | 6.5634  | 1458.91 | 3.6075  |
| v51 | 1456.96 | 0.6825  | 1468.95 | 4.178   |
| v52 | 1492.92 | 5.0773  | 1476.69 | 1.7525  |
| v53 | 1497.64 | 4.8415  | 1495.27 | 3.8141  |
| v54 | 1503.87 | 5.1353  | 1510.47 | 28.2633 |
| v55 | 1546.38 | 25.681  | 1515.12 | 17.5275 |
| v56 | 1647.51 | 1.8658  | 1597.86 | 3.7477  |
| v57 | 1679.42 | 10.3711 | 1621.14 | 14.0424 |
| v58 | 1730.87 | 13.3647 | 1722.83 | 41.9627 |
| v59 | 2356.98 | 0.2889  | 1978.75 | 29.1138 |
| v60 | 3053.11 | 25.6041 | 3047.37 | 34.6308 |
| v61 | 3132.52 | 22.0984 | 3118.32 | 19.1892 |
| v62 | 3144.83 | 14.5868 | 3127.82 | 14.3016 |
| v63 | 3152.95 | 8.1152  | 3135.3  | 17.6614 |
| v64 | 3156.66 | 13.9848 | 3154.62 | 9.1231  |
| v65 | 3167.87 | 12.4577 | 3168.25 | 4.2227  |
| v66 | 3192.25 | 1.1558  | 3190.34 | 4.7082  |
| v67 | 3200.64 | 2.8664  | 3196.47 | 4.2446  |
| v68 | 3210.84 | 13.0879 | 3210.6  | 7.6583  |

|                 |         |         |                 |         |
|-----------------|---------|---------|-----------------|---------|
| v69             | 3217.68 | 18.3247 | 3215.32         | 21.4896 |
| v70             | 3223.65 | 9.1521  | 3217.04         | 4.472   |
| v71             | 3248.68 | 9.3546  | 3222.6          | 13.0171 |
| v72             | 3273.98 | 6.3773  | 3250.04         | 10.2276 |
| <b>tsi30i31</b> |         |         | <b>tsi32i33</b> |         |
| v1              | -668.21 | 42.21   | -649.85         | 41.735  |
| v2              | 31      | 0.0339  | 39.45           | 0.01    |
| v3              | 40.91   | 0.0579  | 46.12           | 0.4623  |
| v4              | 45.34   | 0.3128  | 54.99           | 0.7082  |
| v5              | 69.61   | 1.1447  | 101.48          | 0.3367  |
| v6              | 133.06  | 0.6122  | 157.53          | 0.0379  |
| v7              | 178.05  | 0.2206  | 194.92          | 0.4404  |
| v8              | 212.93  | 0.0271  | 253.97          | 0.6168  |
| v9              | 272.33  | 0.1407  | 284.67          | 0.037   |
| v10             | 323.72  | 2.5314  | 301.84          | 0.4458  |
| v11             | 347.39  | 0.6724  | 352.62          | 1.5555  |
| v12             | 359.19  | 1.8523  | 363.01          | 0.0926  |
| v13             | 416.19  | 0.0085  | 411.67          | 1.5536  |
| v14             | 440.55  | 2.4683  | 417.49          | 0.3805  |
| v15             | 478.74  | 4.3216  | 437.94          | 1.1634  |
| v16             | 518.8   | 4.2082  | 511.91          | 5.6245  |
| v17             | 541.01  | 1.5907  | 524.66          | 5.3308  |
| v18             | 556     | 4.2948  | 537             | 1.2214  |
| v19             | 627.05  | 1.7513  | 625.82          | 2.2424  |
| v20             | 642.71  | 0.2004  | 639.64          | 3.3463  |
| v21             | 658.4   | 20.2747 | 648.57          | 5.0035  |
| v22             | 712.78  | 29.596  | 677.64          | 13.3612 |
| v23             | 716.54  | 3.9811  | 713.09          | 31.8562 |
| v24             | 776.02  | 4.1534  | 737.32          | 6.9236  |
| v25             | 779.24  | 43.0478 | 779.44          | 45.8761 |
| v26             | 785.71  | 0.6118  | 790.13          | 1.6127  |
| v27             | 863.61  | 0.0075  | 864.4           | 0.0026  |
| v28             | 937.81  | 2.8966  | 923.08          | 0.5125  |
| v29             | 946.54  | 1.6951  | 938.89          | 3.1788  |
| v30             | 949.96  | 43.396  | 959.32          | 14.437  |
| v31             | 980.45  | 2.4431  | 971.16          | 33.1983 |
| v32             | 1005.66 | 0.0038  | 993.31          | 2.414   |
| v33             | 1014.52 | 0.7904  | 1006.36         | 0.0012  |
| v34             | 1019.54 | 2.9055  | 1019.56         | 1.767   |
| v35             | 1023.45 | 0.0565  | 1023.7          | 0.0375  |
| v36             | 1060.05 | 3.8462  | 1047.4          | 10.3792 |
| v37             | 1067.73 | 11.1777 | 1059.57         | 7.5457  |
| v38             | 1082.48 | 1.5108  | 1070.24         | 16.9166 |

|                |         |         |                |         |
|----------------|---------|---------|----------------|---------|
| v39            | 1114.19 | 5.9115  | 1114.24        | 5.8162  |
| v40            | 1130.54 | 14.3287 | 1141.32        | 6.8505  |
| v41            | 1186.69 | 0.0899  | 1187.07        | 0.0718  |
| v42            | 1206.48 | 1.8012  | 1206.69        | 5.2054  |
| v43            | 1214.06 | 1.6727  | 1226.76        | 2.7919  |
| v44            | 1295    | 9.0213  | 1284.08        | 0.5785  |
| v45            | 1312.07 | 0.1798  | 1312.49        | 0.0978  |
| v46            | 1316.17 | 23.9258 | 1323.58        | 23.7213 |
| v47            | 1357.94 | 11.9223 | 1360.39        | 0.5716  |
| v48            | 1360.26 | 0.6861  | 1361.53        | 7.6278  |
| v49            | 1421.86 | 10.5976 | 1415.2         | 6.7814  |
| v50            | 1448.18 | 1.8699  | 1450.49        | 5.7219  |
| v51            | 1465.49 | 1.6296  | 1459.52        | 4.6405  |
| v52            | 1488.17 | 3.5463  | 1488.49        | 3.3508  |
| v53            | 1489.97 | 12.1485 | 1502.15        | 4.5666  |
| v54            | 1504.67 | 19.3394 | 1511.42        | 4.8081  |
| v55            | 1534.76 | 51.811  | 1535.49        | 50.4257 |
| v56            | 1628.47 | 2.8797  | 1629.29        | 2.8993  |
| v57            | 1655.1  | 39.9059 | 1655.97        | 39.5407 |
| v58            | 1745.18 | 24.7769 | 1736.62        | 17.9722 |
| v59            | 2108.78 | 7.6195  | 2109.75        | 8.9218  |
| v60            | 3049.01 | 16.3553 | 3057.45        | 25.4459 |
| v61            | 3108.52 | 10.652  | 3137.07        | 13.0656 |
| v62            | 3115.48 | 8.2976  | 3143.52        | 17.3817 |
| v63            | 3145.08 | 21.4124 | 3159.77        | 8.3195  |
| v64            | 3154.59 | 9.8489  | 3172.49        | 5.6088  |
| v65            | 3189.68 | 6.247   | 3179.32        | 6.6043  |
| v66            | 3190.87 | 3.883   | 3190.85        | 4.2197  |
| v67            | 3197.71 | 2.9507  | 3197.98        | 3.2986  |
| v68            | 3210.02 | 9.6642  | 3210.25        | 10.0494 |
| v69            | 3215.38 | 21.7951 | 3215.76        | 21.2885 |
| v70            | 3222.72 | 12.976  | 3222.69        | 12.7735 |
| v71            | 3239.36 | 12.8255 | 3250.28        | 8.8876  |
| v72            | 3309.78 | 1.6254  | 3301.7         | 2.0716  |
| <b>tsi5i31</b> |         |         | <b>tsi9i33</b> |         |
| v1             | -676.72 | 7.3676  | -649.14        | 7.5489  |
| v2             | 34.04   | 0.3496  | 35.18          | 0.4386  |
| v3             | 42.9    | 0.0796  | 43.4           | 0.0109  |
| v4             | 53.19   | 0.3617  | 60.17          | 0.6045  |
| v5             | 96.97   | 1.1162  | 111.58         | 1.025   |
| v6             | 119.4   | 1.3511  | 138.52         | 0.4992  |
| v7             | 197.27  | 0.0606  | 188.85         | 0.4334  |
| v8             | 225.15  | 0.6273  | 193.41         | 0.0881  |

|     |         |         |         |         |
|-----|---------|---------|---------|---------|
| v9  | 271.89  | 1.3332  | 273.07  | 0.9772  |
| v10 | 323.07  | 2.877   | 294.51  | 2.6997  |
| v11 | 369.88  | 4.9259  | 348.35  | 3.646   |
| v12 | 402.4   | 7.8618  | 394.7   | 2.7215  |
| v13 | 415.89  | 0.0083  | 399.83  | 1.013   |
| v14 | 430.91  | 6.3062  | 416.11  | 0.0175  |
| v15 | 507.12  | 8.3061  | 429.34  | 8.7867  |
| v16 | 515.87  | 0.843   | 507.91  | 9.5349  |
| v17 | 529.8   | 5.1897  | 523.09  | 1.1044  |
| v18 | 555.73  | 1.0851  | 552.83  | 0.0161  |
| v19 | 639.45  | 0.0025  | 639.49  | 0.0024  |
| v20 | 692.11  | 5.262   | 680.74  | 12.6975 |
| v21 | 708.09  | 10.3521 | 708.65  | 29.9756 |
| v22 | 709.4   | 22.0456 | 714.34  | 1.5036  |
| v23 | 775.31  | 46.7168 | 746.71  | 0.8086  |
| v24 | 787.3   | 1.0218  | 774.99  | 46.4881 |
| v25 | 832.56  | 0.2175  | 858.63  | 0.0618  |
| v26 | 858.77  | 0.0541  | 909.56  | 45.0993 |
| v27 | 893.44  | 42.4449 | 930.09  | 3.1668  |
| v28 | 930.81  | 3.2433  | 941.5   | 1.1534  |
| v29 | 945.65  | 1.873   | 960.31  | 8.5924  |
| v30 | 976.65  | 1.3434  | 1003.74 | 0.1104  |
| v31 | 1003.47 | 0.0241  | 1005.04 | 9.0723  |
| v32 | 1007.84 | 3.8891  | 1015.13 | 1.0256  |
| v33 | 1016.96 | 3.3198  | 1019.79 | 0.0292  |
| v34 | 1020.11 | 0.0446  | 1022.35 | 12.2597 |
| v35 | 1038.67 | 0.6116  | 1049.11 | 5.9373  |
| v36 | 1058.47 | 4.4348  | 1056.14 | 0.8706  |
| v37 | 1072.12 | 0.5088  | 1062.25 | 4.3192  |
| v38 | 1107.24 | 1.7179  | 1085.81 | 21.461  |
| v39 | 1113.99 | 6.031   | 1113.93 | 5.8339  |
| v40 | 1146.07 | 9.5118  | 1165.82 | 3.3378  |
| v41 | 1182.71 | 7.8453  | 1184.64 | 0.1665  |
| v42 | 1184.77 | 0.1513  | 1204.47 | 9.0586  |
| v43 | 1206.13 | 4.3358  | 1253.81 | 15.1877 |
| v44 | 1310.98 | 0.5555  | 1310.52 | 0.4515  |
| v45 | 1319.01 | 5.2474  | 1326.34 | 17.2709 |
| v46 | 1323.01 | 49.5976 | 1347.09 | 1.5763  |
| v47 | 1359.05 | 0.0155  | 1351.5  | 23.2824 |
| v48 | 1387.61 | 5.8654  | 1358.91 | 0.0096  |
| v49 | 1421.75 | 18.0312 | 1423.16 | 5.3105  |
| v50 | 1453.08 | 3.2358  | 1456.33 | 11.2555 |
| v51 | 1476.48 | 5.2197  | 1475.07 | 2.5624  |

|     |         |         |         |         |
|-----|---------|---------|---------|---------|
| v52 | 1485.92 | 2.9263  | 1485.49 | 2.8948  |
| v53 | 1491.69 | 5.7809  | 1488.02 | 5.3095  |
| v54 | 1507.77 | 7.8855  | 1508.69 | 8.7374  |
| v55 | 1530.32 | 51.1655 | 1529.37 | 52.9673 |
| v56 | 1620.92 | 3.1543  | 1619.59 | 3.2457  |
| v57 | 1641.12 | 48.2181 | 1640.8  | 73.072  |
| v58 | 1654.03 | 16.7073 | 1658.44 | 24.0051 |
| v59 | 2067.92 | 0.6744  | 2064.94 | 0.9784  |
| v60 | 3044.74 | 20.0834 | 3033.78 | 42.575  |
| v61 | 3103.32 | 12.01   | 3101.04 | 23.0779 |
| v62 | 3111.34 | 23.7786 | 3103.21 | 13.9357 |
| v63 | 3144.89 | 16.293  | 3134.4  | 12.702  |
| v64 | 3158.31 | 5.3948  | 3153.65 | 11.9606 |
| v65 | 3182.32 | 1.8416  | 3168.78 | 2.4266  |
| v66 | 3190.45 | 5.0195  | 3177.73 | 5.0669  |
| v67 | 3197.37 | 3.3164  | 3190.43 | 5.2481  |
| v68 | 3208.99 | 5.2148  | 3197.29 | 3.6223  |
| v69 | 3209.84 | 9.5032  | 3210.11 | 9.567   |
| v70 | 3215.3  | 22.5422 | 3215.47 | 21.8465 |
| v71 | 3222.36 | 13.0623 | 3222.54 | 13.2571 |
| v72 | 3247.31 | 11.0425 | 3254.81 | 9.6958  |

---

(c)

| Normal modes | phenylethynyl                 |          | 1,3-pentadiene                |          |
|--------------|-------------------------------|----------|-------------------------------|----------|
|              | Frequency (cm <sup>-1</sup> ) | IR Inten | Frequency (cm <sup>-1</sup> ) | IR Inten |
| v1           | 112.68                        | 17.3904  | 131.97                        | 1.0585   |
| v2           | 148.66                        | 4.6072   | 202.05                        | 1.9123   |
| v3           | 251.55                        | 26.3028  | 208.77                        | 0.067    |
| v4           | 393.87                        | 0        | 260.34                        | 2.3828   |
| v5           | 477.42                        | 3.1292   | 462.55                        | 0.5076   |
| v6           | 490.16                        | 18.9612  | 489.42                        | 0.0238   |
| v7           | 511.05                        | 0.7921   | 656.74                        | 2.8089   |
| v8           | 632.48                        | 0.1684   | 864.23                        | 6.4716   |
| v9           | 696.07                        | 46.3153  | 917.57                        | 6.6942   |
| v10          | 787.71                        | 0.2095   | 953.24                        | 36.4845  |
| v11          | 799.2                         | 23.247   | 998.65                        | 10.1544  |
| v12          | 870.13                        | 0        | 1000.04                       | 19.3425  |
| v13          | 981.96                        | 0.8822   | 1057.7                        | 39.1114  |
| v14          | 1019.66                       | 4.5667   | 1076.83                       | 0.9696   |
| v15          | 1024.97                       | 0        | 1109.43                       | 0.0176   |
| v16          | 1044.22                       | 0.1747   | 1216.83                       | 1.4656   |
| v17          | 1053.58                       | 0.6553   | 1307.85                       | 1.4309   |
| v18          | 1116.24                       | 5.0608   | 1334.64                       | 0.4029   |
| v19          | 1185.47                       | 81.7314  | 1351.17                       | 2.7386   |
| v20          | 1191.6                        | 3.3766   | 1421.4                        | 3.0959   |
| v21          | 1230.32                       | 21.1034  | 1461.6                        | 6.4638   |
| v22          | 1324.35                       | 7.2501   | 1484.93                       | 7.3496   |
| v23          | 1358.66                       | 7.8198   | 1498.3                        | 9.3767   |
| v24          | 1483.47                       | 12.0342  | 1700.6                        | 7.1524   |
| v25          | 1514.79                       | 1.8218   | 1763.17                       | 19.7671  |
| v26          | 1614.98                       | 0.511    | 3039.34                       | 32.2637  |
| v27          | 1639.86                       | 92.1565  | 3095.39                       | 17.3961  |
| v28          | 2020.99                       | 45.6399  | 3125.97                       | 7.8623   |
| v29          | 3200.68                       | 0.3554   | 3145.31                       | 1.3733   |
| v30          | 3213.21                       | 3.2854   | 3149.89                       | 6.6579   |
| v31          | 3219.82                       | 5.1552   | 3153.34                       | 40.6994  |
| v32          | 3230.21                       | 3.8096   | 3161.89                       | 12.0446  |
| v33          | 3233.27                       | 5.2791   | 3246.23                       | 12.3311  |

**i13**

**i14**



|     |         |         |         |         |
|-----|---------|---------|---------|---------|
| v1  | 11.89   | 0.004   | 17.95   | 0.0176  |
| v2  | 32.28   | 0.2216  | 23.79   | 0.1489  |
| v3  | 60.42   | 0.137   | 70.17   | 0.3412  |
| v4  | 102.43  | 1.1776  | 84.11   | 0.9855  |
| v5  | 109.87  | 1.0408  | 118.86  | 0.5055  |
| v6  | 128.34  | 3.2216  | 163.88  | 1.5658  |
| v7  | 193.18  | 0.1349  | 179.27  | 0.2199  |
| v8  | 202.78  | 2.4097  | 205.43  | 0.0318  |
| v9  | 236.6   | 0.0126  | 241.03  | 1.0563  |
| v10 | 275.01  | 2.7282  | 288.54  | 0.136   |
| v11 | 335.26  | 1.6687  | 376.58  | 7.6596  |
| v12 | 396.69  | 0.1861  | 412.28  | 0.1573  |
| v13 | 417.78  | 0.0046  | 462.76  | 2.6721  |
| v14 | 420.98  | 0.5386  | 476.18  | 0.435   |
| v15 | 473.38  | 0.4944  | 488.6   | 5.9686  |
| v16 | 547.34  | 0.8294  | 513.01  | 1.2309  |
| v17 | 558.41  | 6.4762  | 533.96  | 3.9029  |
| v18 | 642.67  | 0.4525  | 631.54  | 0.3841  |
| v19 | 655.29  | 3.9731  | 692.89  | 32.7513 |
| v20 | 719.98  | 0.8303  | 718.93  | 18.8691 |
| v21 | 720.99  | 34.6378 | 733.75  | 11.9092 |
| v22 | 743.44  | 2.954   | 763.98  | 42.7519 |
| v23 | 762.71  | 17.4388 | 795.56  | 15.3155 |
| v24 | 792.44  | 39.7608 | 840.3   | 0.4893  |
| v25 | 877.11  | 0.011   | 854.18  | 11.0643 |
| v26 | 925.43  | 1.4905  | 880.04  | 2.632   |
| v27 | 930.3   | 5.0788  | 909.48  | 4.3101  |
| v28 | 946.66  | 17.6273 | 940.83  | 14.6203 |
| v29 | 959.92  | 3.7214  | 960.9   | 17.3728 |
| v30 | 997.79  | 25.3548 | 996.01  | 1.7587  |
| v31 | 1014    | 0.0099  | 998.58  | 13.0422 |
| v32 | 1028.2  | 0.0094  | 1000.65 | 2.1987  |
| v33 | 1032.72 | 0.11    | 1012.7  | 0.0028  |
| v34 | 1035.39 | 3.1415  | 1034.48 | 14.8601 |
| v35 | 1037.74 | 6.1953  | 1046.82 | 5.2156  |
| v36 | 1067.36 | 2.7123  | 1076.56 | 0.7359  |
| v37 | 1113.96 | 5.4961  | 1101.02 | 0.7548  |
| v38 | 1132.32 | 2.2698  | 1112.86 | 4.8467  |
| v39 | 1190.7  | 0.0332  | 1149.12 | 5.961   |

|       |            |         |            |         |
|-------|------------|---------|------------|---------|
| v40   | 1203.88    | 0.9998  | 1174.15    | 3.7967  |
| v41   | 1212.99    | 0.1648  | 1178.64    | 0.3341  |
| v42   | 1225.54    | 0.7149  | 1216.88    | 2.1463  |
| v43   | 1278.71    | 3.3622  | 1271.73    | 2.5588  |
| v44   | 1292.79    | 0.0107  | 1301.4     | 0.6396  |
| v45   | 1313.99    | 6.0969  | 1328.74    | 2.1928  |
| v46   | 1316.97    | 0.2266  | 1352.61    | 1.5371  |
| v47   | 1361.59    | 0.372   | 1354.36    | 0.2345  |
| v48   | 1365.51    | 14.4298 | 1369.09    | 1.1505  |
| v49   | 1417.88    | 1.069   | 1420.9     | 4.9713  |
| v50   | 1456.07    | 2.8655  | 1452.66    | 5.7263  |
| v51   | 1467.96    | 23.1992 | 1471.95    | 1.4951  |
| v52   | 1480.03    | 5.7055  | 1484.73    | 5.435   |
| v53   | 1492.76    | 5.0145  | 1497.38    | 17.797  |
| v54   | 1510.68    | 21.6936 | 1502.47    | 16.4498 |
| v55   | 1542.26    | 21.8471 | 1590.93    | 3.8268  |
| v56   | 1547.24    | 25.0483 | 1614.53    | 5.4484  |
| v57   | 1647.96    | 1.6413  | 1686.34    | 3.4519  |
| v58   | 1679.95    | 9.394   | 1745.37    | 27.1257 |
| v59   | 2378.78    | 2.6899  | 1884.47    | 3.3959  |
| v60   | 3016.18    | 27.0263 | 3037.99    | 29.4583 |
| v61   | 3023.08    | 35.591  | 3075.3     | 23.876  |
| v62   | 3037.12    | 6.067   | 3093.99    | 15.3908 |
| v63   | 3070.4     | 19.2238 | 3126.26    | 3.8417  |
| v64   | 3120.82    | 12.529  | 3147.93    | 29.4864 |
| v65   | 3151.08    | 0.7692  | 3155.45    | 3.8367  |
| v66   | 3160.71    | 16.1623 | 3186.78    | 37.9125 |
| v67   | 3171.99    | 42.934  | 3191.42    | 1.9574  |
| v68   | 3191.85    | 0.7784  | 3195.25    | 13.4293 |
| v69   | 3200.73    | 2.9553  | 3197.27    | 5.1486  |
| v70   | 3210.62    | 14.0329 | 3211.49    | 7.6214  |
| v71   | 3217.89    | 18.3872 | 3216.6     | 17.0556 |
| v72   | 3223.57    | 7.8065  | 3223.77    | 11.5995 |
| <hr/> |            |         |            |         |
|       | <b>i15</b> |         | <b>i16</b> |         |
| v1    | 35.42      | 0.116   | 47.87      | 0.1579  |
| v2    | 77.71      | 0.0765  | 70.53      | 0.0062  |
| v3    | 103.85     | 1.7464  | 101.66     | 0.7383  |
| v4    | 144.42     | 1.3984  | 146.93     | 0.3881  |

|     |         |         |         |         |
|-----|---------|---------|---------|---------|
| v5  | 228.79  | 0.0436  | 229.54  | 0.0333  |
| v6  | 244.82  | 0.5453  | 252.16  | 0.3015  |
| v7  | 257.69  | 0.117   | 276.56  | 0.1162  |
| v8  | 294.18  | 3.3062  | 321.66  | 0.1096  |
| v9  | 325.67  | 0.1235  | 404.32  | 0.7081  |
| v10 | 417.75  | 1.4447  | 419.84  | 0.1757  |
| v11 | 420.09  | 0.1642  | 422.05  | 0.4109  |
| v12 | 472.96  | 3.678   | 482.66  | 7.2254  |
| v13 | 495.12  | 0.3717  | 548.49  | 1.406   |
| v14 | 561.24  | 1.357   | 574.9   | 1.268   |
| v15 | 598.31  | 3.733   | 609.74  | 1.3745  |
| v16 | 638.04  | 6.2775  | 639.7   | 0.1126  |
| v17 | 642.26  | 6.1028  | 663     | 1.6185  |
| v18 | 714.92  | 11.2938 | 705.36  | 56.3021 |
| v19 | 722.33  | 36.3166 | 721.68  | 45.9147 |
| v20 | 740.24  | 14.3041 | 734.33  | 7.7148  |
| v21 | 796.78  | 34.6185 | 791.51  | 20.0788 |
| v22 | 827.53  | 2.6962  | 808.05  | 8.8016  |
| v23 | 873.13  | 0.2736  | 839.96  | 1.2521  |
| v24 | 911.5   | 0.2418  | 870.45  | 0.2052  |
| v25 | 942.96  | 6.1643  | 943.95  | 4.4127  |
| v26 | 952.27  | 1.5542  | 950.77  | 2.8199  |
| v27 | 968.82  | 8.882   | 961.97  | 1.7601  |
| v28 | 989.08  | 2.6318  | 996.03  | 1.6555  |
| v29 | 1009.43 | 0.0275  | 1002.5  | 3.4585  |
| v30 | 1016.17 | 1.7459  | 1009.93 | 0.1126  |
| v31 | 1023.01 | 0.8266  | 1024.07 | 0.4695  |
| v32 | 1027.78 | 0.1221  | 1026.18 | 0.7758  |
| v33 | 1029.44 | 0.0508  | 1031.27 | 1.2029  |
| v34 | 1068.18 | 4.768   | 1042.46 | 2.8657  |
| v35 | 1074.42 | 0.8949  | 1067.1  | 3.7879  |
| v36 | 1096.42 | 2.0998  | 1071.21 | 2.49    |
| v37 | 1116.31 | 6.2236  | 1110.21 | 4.6187  |
| v38 | 1154.35 | 4.6731  | 1123.19 | 5.8329  |
| v39 | 1188.94 | 0.063   | 1136.61 | 4.0186  |
| v40 | 1209.01 | 0.844   | 1190.66 | 0.0791  |
| v41 | 1210.38 | 1.2568  | 1201.18 | 0.5395  |
| v42 | 1224.27 | 0.2245  | 1223.34 | 0.271   |
| v43 | 1280.4  | 0.4506  | 1283.71 | 2.9018  |

|     |         |         |         |         |
|-----|---------|---------|---------|---------|
| v44 | 1317.32 | 2.9607  | 1287.44 | 0.3104  |
| v45 | 1323.67 | 0.4622  | 1298.3  | 5.4886  |
| v46 | 1340.63 | 0.6741  | 1322.51 | 2.5993  |
| v47 | 1357.83 | 0.4229  | 1346.83 | 0.4883  |
| v48 | 1375.69 | 0.5509  | 1369.7  | 0.7467  |
| v49 | 1408.32 | 3.9103  | 1404.06 | 4.4636  |
| v50 | 1421.59 | 6.378   | 1427.35 | 2.4689  |
| v51 | 1476.15 | 4.6572  | 1440.89 | 4.4717  |
| v52 | 1493.92 | 3.4176  | 1493.36 | 2.9026  |
| v53 | 1500.14 | 7.5425  | 1499.44 | 6.4475  |
| v54 | 1506.83 | 3.0852  | 1506.51 | 4.9652  |
| v55 | 1547.58 | 18.3471 | 1540.74 | 17.0515 |
| v56 | 1652.02 | 2.3871  | 1552.75 | 5.0863  |
| v57 | 1679.71 | 11.1669 | 1633.15 | 4.5376  |
| v58 | 1741.66 | 15.8358 | 1647.41 | 1.6939  |
| v59 | 1769.78 | 0.893   | 1672.31 | 12.53   |
| v60 | 3024.57 | 15.7135 | 2977.9  | 17.6209 |
| v61 | 3030.76 | 38.3797 | 3050.53 | 28.3262 |
| v62 | 3049.34 | 26.5584 | 3128.46 | 19.5662 |
| v63 | 3054.69 | 9.5323  | 3138.52 | 16.0644 |
| v64 | 3123.25 | 22.6504 | 3177.25 | 5.6953  |
| v65 | 3137.2  | 21.8342 | 3187.19 | 7.9993  |
| v66 | 3159.76 | 7.933   | 3188.97 | 0.3955  |
| v67 | 3186.01 | 35.5415 | 3195.07 | 2.0742  |
| v68 | 3187.07 | 1.7227  | 3199.05 | 31.1612 |
| v69 | 3193.79 | 0.9004  | 3206.03 | 7.0568  |
| v70 | 3203.37 | 11.1183 | 3211.6  | 24.4919 |
| v71 | 3210.94 | 27.8004 | 3220.2  | 23.4508 |
| v72 | 3219.57 | 13.4782 | 3221.39 | 11.1643 |

|    | <b>i17</b> |        | <b>i18</b> |        |
|----|------------|--------|------------|--------|
| v1 | 14.57      | 0.012  | 22.52      | 0.2837 |
| v2 | 40.91      | 0.4063 | 28.93      | 0.1258 |
| v3 | 66.1       | 1.121  | 67.99      | 0.2814 |
| v4 | 74.4       | 0.5027 | 98.8       | 0.7079 |
| v5 | 127.77     | 0.521  | 150.16     | 0.5668 |
| v6 | 158.41     | 0.4675 | 162.69     | 0.5993 |
| v7 | 189.77     | 0.0634 | 181.59     | 0.0721 |
| v8 | 232.2      | 0.1216 | 210.87     | 0.7547 |

|     |         |         |         |         |
|-----|---------|---------|---------|---------|
| v9  | 274.62  | 0.2084  | 240.62  | 0.8825  |
| v10 | 306.97  | 0.1743  | 305.49  | 0.4039  |
| v11 | 369.3   | 0.8058  | 312.43  | 1.481   |
| v12 | 417.77  | 0.081   | 412.05  | 0.2199  |
| v13 | 418.28  | 0.3596  | 446.87  | 5.8199  |
| v14 | 457.23  | 2.0804  | 475.3   | 2.2182  |
| v15 | 499.93  | 4.8499  | 482.55  | 6.0006  |
| v16 | 551.74  | 2.9391  | 526.37  | 3.3517  |
| v17 | 558.88  | 7.5894  | 537.58  | 1.7564  |
| v18 | 587.91  | 0.128   | 605.64  | 2.9179  |
| v19 | 644.31  | 0.0607  | 631.82  | 0.2328  |
| v20 | 664.52  | 3.8656  | 683.93  | 13.5881 |
| v21 | 712.04  | 2.7495  | 692.78  | 33.6358 |
| v22 | 721.2   | 33.7664 | 763.66  | 44.6819 |
| v23 | 773.56  | 1.2881  | 784.92  | 6.3452  |
| v24 | 792.63  | 40.1747 | 835.05  | 3.6976  |
| v25 | 816.19  | 48.4488 | 847.27  | 4.3385  |
| v26 | 861.97  | 1.5496  | 879.19  | 8.3725  |
| v27 | 877.48  | 0.0061  | 909.8   | 3.2996  |
| v28 | 943.94  | 1.1992  | 913.59  | 0.2894  |
| v29 | 960.36  | 3.5179  | 957.75  | 43.7323 |
| v30 | 1014.36 | 0.5381  | 970.05  | 3.5523  |
| v31 | 1017.22 | 20.8629 | 993.94  | 1.95    |
| v32 | 1023.28 | 5.9288  | 1000.15 | 0.0393  |
| v33 | 1028.22 | 0.8571  | 1012.79 | 0.0027  |
| v34 | 1033.18 | 0.0445  | 1041.16 | 10.1501 |
| v35 | 1036.9  | 5.37    | 1046.39 | 5.7696  |
| v36 | 1064.96 | 3.8669  | 1054.96 | 6.8357  |
| v37 | 1078.96 | 0.6448  | 1074.98 | 9.582   |
| v38 | 1114.47 | 5.8037  | 1112.82 | 5.1864  |
| v39 | 1148.04 | 0.2369  | 1131.05 | 0.6429  |
| v40 | 1191.08 | 0.0292  | 1156.48 | 10.7387 |
| v41 | 1201.93 | 0.8697  | 1178.11 | 0.3207  |
| v42 | 1213.47 | 0.1569  | 1216.11 | 1.4475  |
| v43 | 1282.09 | 2.1473  | 1233.43 | 7.0766  |
| v44 | 1297.56 | 0.491   | 1301.7  | 0.5977  |
| v45 | 1306.75 | 2.4587  | 1322.07 | 1.4863  |
| v46 | 1317.41 | 0.2341  | 1341.54 | 5.5537  |
| v47 | 1329.69 | 10.0069 | 1353.56 | 0.11    |

|     |         |         |         |         |
|-----|---------|---------|---------|---------|
| v48 | 1362.4  | 0.3307  | 1389.76 | 4.5779  |
| v49 | 1376.86 | 24.7591 | 1422.06 | 5.5505  |
| v50 | 1412.65 | 3.1048  | 1461.99 | 11.9975 |
| v51 | 1493.18 | 5.0911  | 1471.56 | 1.3462  |
| v52 | 1497.64 | 5.7317  | 1484.97 | 7.8511  |
| v53 | 1504.46 | 7.6395  | 1499.9  | 10.4602 |
| v54 | 1510.61 | 19.4811 | 1502.71 | 13.2541 |
| v55 | 1527.65 | 6.7033  | 1590.87 | 3.9675  |
| v56 | 1547.57 | 26.4331 | 1614.47 | 4.0021  |
| v57 | 1648.05 | 1.7194  | 1684.53 | 3.8576  |
| v58 | 1680.26 | 9.7986  | 1737.08 | 12.7798 |
| v59 | 2374.25 | 1.5036  | 1893.32 | 8.7524  |
| v60 | 3007.27 | 12.1988 | 3037.72 | 31.9151 |
| v61 | 3054.8  | 30.8819 | 3060.65 | 31.2991 |
| v62 | 3135.08 | 26.0093 | 3093.9  | 16.1385 |
| v63 | 3142.4  | 20.2361 | 3139.99 | 14.5804 |
| v64 | 3156.48 | 3.7077  | 3151.48 | 3.9392  |
| v65 | 3161.81 | 30.6208 | 3153.78 | 26.0564 |
| v66 | 3170.21 | 7.1657  | 3191.38 | 2.9679  |
| v67 | 3192.15 | 0.8474  | 3195.53 | 4.2283  |
| v68 | 3200.86 | 2.8635  | 3197.25 | 4.7127  |
| v69 | 3210.78 | 13.5003 | 3210.38 | 7.8559  |
| v70 | 3217.89 | 18.1116 | 3215.86 | 17.1744 |
| v71 | 3223.67 | 8.283   | 3223.51 | 12.2814 |
| v72 | 3259.51 | 8.5005  | 3246.35 | 11.3427 |

|     | <b>i19</b> |        | <b>i20</b> |        |
|-----|------------|--------|------------|--------|
| v1  | 26.55      | 0.0039 | 33.16      | 0.0876 |
| v2  | 77.06      | 0.7261 | 75.32      | 0.5738 |
| v3  | 108.01     | 2.0294 | 89.39      | 0.0554 |
| v4  | 133.52     | 0.6239 | 144.88     | 0.5987 |
| v5  | 190.02     | 0.2032 | 152.59     | 1.5615 |
| v6  | 238.97     | 0.0423 | 218.65     | 0.2097 |
| v7  | 280.66     | 0.0136 | 296.94     | 0.2051 |
| v8  | 308.54     | 0.152  | 312.97     | 0.1388 |
| v9  | 362.16     | 2.8686 | 342.29     | 0.3237 |
| v10 | 416.99     | 1.5877 | 415.08     | 1.6763 |
| v11 | 418.72     | 1.0389 | 418.59     | 0.0682 |
| v12 | 468.69     | 0.6609 | 458.02     | 2.317  |

|     |         |         |         |         |
|-----|---------|---------|---------|---------|
| v13 | 497.51  | 2.4159  | 510.01  | 0.7265  |
| v14 | 569.37  | 4.2605  | 551.67  | 0.845   |
| v15 | 583.05  | 2.4319  | 564.62  | 18.6675 |
| v16 | 604.35  | 4.532   | 622.39  | 2.478   |
| v17 | 639.8   | 0.1191  | 638.4   | 0.3512  |
| v18 | 711.99  | 15.1891 | 700.85  | 4.7451  |
| v19 | 720.01  | 34.8368 | 714.63  | 40.4626 |
| v20 | 749.51  | 32.5543 | 746.23  | 26.4921 |
| v21 | 791.05  | 24.9221 | 788.05  | 28.1557 |
| v22 | 847.23  | 2.2152  | 850.42  | 0.6923  |
| v23 | 871.61  | 0.038   | 861.58  | 0.1014  |
| v24 | 906.67  | 1.007   | 918.95  | 9.8362  |
| v25 | 943.44  | 0.9647  | 930.74  | 0.9882  |
| v26 | 944.51  | 1.7748  | 934.52  | 0.2199  |
| v27 | 971.13  | 6.6728  | 957.65  | 4.7375  |
| v28 | 978.79  | 6.0555  | 987.46  | 25.2307 |
| v29 | 1009.84 | 0.0491  | 997.43  | 0.907   |
| v30 | 1021.36 | 0.7835  | 1003.18 | 10.3087 |
| v31 | 1027.81 | 0.104   | 1005.85 | 2.5822  |
| v32 | 1028.64 | 0.0643  | 1020.75 | 0.8797  |
| v33 | 1039.72 | 0.9037  | 1024.38 | 0.0791  |
| v34 | 1067.31 | 1.391   | 1044.8  | 4.4367  |
| v35 | 1068.27 | 4.4748  | 1047.74 | 3.7892  |
| v36 | 1098.7  | 4.3088  | 1072.52 | 4.8578  |
| v37 | 1117.52 | 6.3884  | 1129.81 | 5.0431  |
| v38 | 1151.15 | 1.5215  | 1191.64 | 0.4141  |
| v39 | 1189.49 | 0.0778  | 1195.7  | 3.8663  |
| v40 | 1207.73 | 0.7352  | 1219.78 | 0.1082  |
| v41 | 1217.27 | 0.3078  | 1222.07 | 0.1058  |
| v42 | 1233.15 | 0.8396  | 1231.7  | 15.2754 |
| v43 | 1280.61 | 0.2986  | 1254.24 | 14.5568 |
| v44 | 1314.61 | 0.5528  | 1305.35 | 1.5597  |
| v45 | 1327.86 | 1.3639  | 1330.27 | 0.5556  |
| v46 | 1344.83 | 5.7402  | 1361.14 | 2.93    |
| v47 | 1359.83 | 0.1593  | 1384.1  | 2.0848  |
| v48 | 1378.06 | 2.0114  | 1420.68 | 0.3915  |
| v49 | 1407.49 | 3.1408  | 1433.32 | 2.8966  |
| v50 | 1421.52 | 2.2925  | 1443.85 | 3.6559  |
| v51 | 1481.49 | 4.4989  | 1461.07 | 13.7946 |

|     |         |         |         |         |
|-----|---------|---------|---------|---------|
| v52 | 1495.7  | 7.0779  | 1484.82 | 6.0239  |
| v53 | 1499.57 | 6.4927  | 1493.07 | 9.8462  |
| v54 | 1505.13 | 3.6364  | 1499.41 | 11.26   |
| v55 | 1547.47 | 21.0221 | 1526.79 | 2.8327  |
| v56 | 1652.6  | 3.2074  | 1553.83 | 23.2059 |
| v57 | 1680.36 | 12.7555 | 1644.78 | 5.7078  |
| v58 | 1740.47 | 15.4195 | 1658.74 | 6.29    |
| v59 | 1768.56 | 0.7755  | 1672.67 | 21.98   |
| v60 | 3018.25 | 17.4019 | 2953.3  | 25.7761 |
| v61 | 3022.43 | 33.0603 | 2993.09 | 20.6421 |
| v62 | 3048.76 | 8.9065  | 3030.99 | 44.7869 |
| v63 | 3050.46 | 38.8564 | 3083.37 | 18.1156 |
| v64 | 3128.09 | 26.1109 | 3129.2  | 15.6203 |
| v65 | 3135.95 | 21.1306 | 3173.35 | 13.2795 |
| v66 | 3159.26 | 9.4418  | 3187.02 | 12.769  |
| v67 | 3185.11 | 5.2668  | 3189.59 | 4.0016  |
| v68 | 3185.59 | 30.5008 | 3197.17 | 4.296   |
| v69 | 3192.28 | 0.4645  | 3198.92 | 24.6483 |
| v70 | 3202.25 | 12.6658 | 3212.68 | 20.6094 |
| v71 | 3212.04 | 25.6926 | 3220.49 | 24.1813 |
| v72 | 3219.99 | 13.2721 | 3224.67 | 5.0583  |

|     | <b>i26</b> |        | <b>i27</b> |         |
|-----|------------|--------|------------|---------|
| v1  | 24.65      | 0.6411 | 46.45      | 0.1183  |
| v2  | 34.55      | 0.0794 | 86.62      | 0.2136  |
| v3  | 65.04      | 0.1902 | 121.92     | 0.0331  |
| v4  | 101.09     | 1.0485 | 165.73     | 1.105   |
| v5  | 171.04     | 0.3653 | 212.68     | 0.1756  |
| v6  | 236.97     | 0.4162 | 241.02     | 0.2964  |
| v7  | 247.84     | 0.0932 | 268.31     | 1.0211  |
| v8  | 268.82     | 1.1423 | 299.17     | 0.2626  |
| v9  | 305.89     | 0.4298 | 327.66     | 0.5102  |
| v10 | 411.68     | 6.9918 | 376.23     | 0.5957  |
| v11 | 415.44     | 0.33   | 423.71     | 0.1166  |
| v12 | 453.01     | 5.5039 | 511.76     | 9.2905  |
| v13 | 499.16     | 4.267  | 550.51     | 0.1856  |
| v14 | 516.29     | 3.5893 | 607.67     | 10.4339 |
| v15 | 586.57     | 1.4773 | 631.16     | 1.4054  |
| v16 | 626.95     | 3.1849 | 638.81     | 4.1108  |



|     |         |         |         |         |
|-----|---------|---------|---------|---------|
| v17 | 638.25  | 1.0308  | 701.04  | 15.2848 |
| v18 | 695.14  | 33.4808 | 718.14  | 38.6198 |
| v19 | 715.68  | 22.3692 | 728.24  | 33.9753 |
| v20 | 756.59  | 17.32   | 769.13  | 22.4219 |
| v21 | 766.95  | 44.0971 | 786.1   | 4.284   |
| v22 | 786.93  | 0.224   | 803.39  | 4.9064  |
| v23 | 843.65  | 0.0557  | 823.15  | 7.8663  |
| v24 | 865.08  | 1.9392  | 859.13  | 14.4663 |
| v25 | 909.98  | 13.6872 | 870.69  | 6.9918  |
| v26 | 912.98  | 3.7702  | 881.37  | 2.4143  |
| v27 | 962.74  | 4.3496  | 936.65  | 2.2792  |
| v28 | 974.01  | 6.5014  | 949.45  | 6.7451  |
| v29 | 996.94  | 1.0182  | 970.52  | 1.3723  |
| v30 | 999.98  | 0.225   | 1005.3  | 0.3851  |
| v31 | 1000.52 | 0.2852  | 1007.89 | 0.0197  |
| v32 | 1012.98 | 0.0114  | 1024.15 | 0.2413  |
| v33 | 1017.79 | 0.4256  | 1027.79 | 1.0781  |
| v34 | 1047.91 | 4.7002  | 1039.71 | 2.0683  |
| v35 | 1087    | 5.2711  | 1064.97 | 4.5296  |
| v36 | 1111.78 | 5.6683  | 1087.76 | 5.9441  |
| v37 | 1115.27 | 1.2939  | 1107.54 | 0.849   |
| v38 | 1132.18 | 3.4546  | 1128.11 | 12.1892 |
| v39 | 1149.67 | 1.7868  | 1130.35 | 4.3518  |
| v40 | 1178.3  | 0.2584  | 1187.52 | 0.7049  |
| v41 | 1181.44 | 0.7002  | 1200.09 | 2.0172  |
| v42 | 1188.53 | 0.8829  | 1220.43 | 0.238   |
| v43 | 1251.23 | 0.1061  | 1239.99 | 1.1128  |
| v44 | 1291.26 | 5.5563  | 1276.48 | 1.6694  |
| v45 | 1302.53 | 0.5032  | 1296.63 | 1.0297  |
| v46 | 1325.92 | 7.5366  | 1324.68 | 0.1078  |
| v47 | 1340.36 | 1.9591  | 1349.62 | 2.3768  |
| v48 | 1353.02 | 0.0332  | 1363.17 | 0.2208  |
| v49 | 1384.54 | 2.3187  | 1391.95 | 2.0559  |
| v50 | 1414.86 | 4.3778  | 1408.42 | 2.443   |
| v51 | 1474.02 | 1.6468  | 1430.04 | 3.8338  |
| v52 | 1480.53 | 5.0858  | 1479.37 | 3.8649  |
| v53 | 1500.54 | 14.2998 | 1502.82 | 2.7058  |
| v54 | 1501.96 | 6.5334  | 1508.04 | 2.8563  |
| v55 | 1504.78 | 12.0528 | 1531.02 | 4.8546  |

|     |         |         |         |         |
|-----|---------|---------|---------|---------|
| v56 | 1594.01 | 3.8482  | 1542.46 | 22.5242 |
| v57 | 1617.52 | 7.3298  | 1565.81 | 1.7008  |
| v58 | 1718.15 | 18.6494 | 1640.49 | 1.3812  |
| v59 | 1918.27 | 0.0554  | 1664.62 | 12.997  |
| v60 | 3030.37 | 17.0259 | 3052.48 | 6.6306  |
| v61 | 3045.06 | 28.9324 | 3055.81 | 30.6688 |
| v62 | 3050.02 | 25.088  | 3128.89 | 19.2345 |
| v63 | 3083.71 | 11.0229 | 3145.32 | 9.9742  |
| v64 | 3120.87 | 30.0935 | 3152.95 | 12.6318 |
| v65 | 3127.69 | 20.8852 | 3183.65 | 6.8718  |
| v66 | 3189.5  | 4.1429  | 3192.81 | 0.1747  |
| v67 | 3195.34 | 3.9626  | 3203.35 | 22.2343 |
| v68 | 3195.62 | 6.0901  | 3215.29 | 5.6983  |
| v69 | 3209.51 | 7.1522  | 3217.72 | 25.075  |
| v70 | 3213.87 | 22.3578 | 3225.93 | 13.2039 |
| v71 | 3221.82 | 22.1063 | 3239.28 | 5.8454  |
| v72 | 3222.37 | 20.7057 | 3242.78 | 13.7776 |

|     | <b>tsi13i14</b> |          | <b>tsi13i15</b> |         |
|-----|-----------------|----------|-----------------|---------|
| v1  | -1890.96        | 585.3859 | -655.03         | 43.51   |
| v2  | 29.22           | 0.0786   | 32.77           | 0.0087  |
| v3  | 34.47           | 0.0681   | 54.98           | 0.2745  |
| v4  | 60.19           | 1.1718   | 70.85           | 0.6357  |
| v5  | 103.45          | 0.6896   | 111.34          | 1.5778  |
| v6  | 119.31          | 0.4519   | 153.22          | 0.2617  |
| v7  | 168.13          | 4.1051   | 228.57          | 0.3188  |
| v8  | 197.01          | 1.7978   | 238.57          | 3.3876  |
| v9  | 206.43          | 0.9378   | 288.06          | 4.8256  |
| v10 | 249.28          | 2.5796   | 303.66          | 0.1295  |
| v11 | 329.04          | 1.8274   | 338.02          | 0.2933  |
| v12 | 378.03          | 2.3763   | 418.27          | 0.0139  |
| v13 | 403.41          | 4.5832   | 443.38          | 3.6686  |
| v14 | 415.06          | 0.018    | 465.87          | 7.1038  |
| v15 | 478.5           | 4.0862   | 510.23          | 19.1622 |
| v16 | 485.21          | 4.0227   | 522.36          | 9.4623  |
| v17 | 520.53          | 13.4363  | 560.47          | 3.4938  |
| v18 | 552.39          | 3.4451   | 642.26          | 0.2718  |
| v19 | 639.85          | 0.2818   | 692.06          | 28.0952 |
| v20 | 677.5           | 11.5815  | 717.03          | 9.4321  |

|     |         |         |         |         |
|-----|---------|---------|---------|---------|
| v21 | 692.69  | 18.4493 | 722.23  | 31.885  |
| v22 | 712.31  | 32.7852 | 766.05  | 10.419  |
| v23 | 748.44  | 10.1629 | 781.84  | 36.9928 |
| v24 | 776.43  | 46.6362 | 828.2   | 1.4188  |
| v25 | 789.79  | 4.4382  | 875.86  | 0.04    |
| v26 | 839.84  | 15.8911 | 894.62  | 3.5457  |
| v27 | 861.42  | 0.013   | 926.22  | 0.9411  |
| v28 | 933.44  | 3.2683  | 956.08  | 3.6299  |
| v29 | 944.39  | 16.6073 | 965.51  | 3.7306  |
| v30 | 975.56  | 9.436   | 978.54  | 2.1875  |
| v31 | 992.92  | 46.1873 | 1009.67 | 2.3326  |
| v32 | 1004.13 | 0.1089  | 1012.66 | 0.0203  |
| v33 | 1016.84 | 2.1898  | 1026.05 | 18.9174 |
| v34 | 1021.4  | 9.9311  | 1028.67 | 0.9514  |
| v35 | 1021.74 | 1.7695  | 1031.75 | 0.0503  |
| v36 | 1059.93 | 0.259   | 1065.7  | 4.5512  |
| v37 | 1060.27 | 3.4319  | 1112.55 | 6.5497  |
| v38 | 1104.47 | 2.77    | 1126.7  | 4.6378  |
| v39 | 1114.71 | 5.3652  | 1150.93 | 2.4918  |
| v40 | 1159.54 | 15.4592 | 1189.68 | 0.0215  |
| v41 | 1186.81 | 0.1833  | 1209.27 | 0.1179  |
| v42 | 1207.73 | 6.2605  | 1211.25 | 0.0452  |
| v43 | 1218.67 | 1.1755  | 1247.21 | 0.6634  |
| v44 | 1300.6  | 13.5268 | 1273.27 | 2.3554  |
| v45 | 1311.39 | 0.5445  | 1316.74 | 0.0662  |
| v46 | 1318.36 | 5.3526  | 1323.2  | 0.6904  |
| v47 | 1332.84 | 13.313  | 1346.86 | 1.2513  |
| v48 | 1361.27 | 0.0051  | 1359.93 | 0.3915  |
| v49 | 1418.25 | 15.3876 | 1412.96 | 2.5144  |
| v50 | 1428.72 | 1.4807  | 1436.14 | 10.8788 |
| v51 | 1482.27 | 6.2326  | 1470.86 | 5.0629  |
| v52 | 1487.23 | 8.5994  | 1488.74 | 5.3834  |
| v53 | 1489.26 | 1.6672  | 1492.6  | 10.8561 |
| v54 | 1509.15 | 47.8515 | 1495.19 | 4.8858  |
| v55 | 1537.53 | 34.6862 | 1542.96 | 21.484  |
| v56 | 1627.98 | 2.9549  | 1648.12 | 2.0845  |
| v57 | 1636.24 | 13.3432 | 1656.81 | 7.3978  |
| v58 | 1656.53 | 46.2729 | 1676.68 | 10.4946 |
| v59 | 1796.94 | 93.414  | 2070.83 | 2.9736  |

|     |         |         |         |         |
|-----|---------|---------|---------|---------|
| v60 | 2158.76 | 42.9616 | 3016.92 | 32.4753 |
| v61 | 3031.78 | 49.5952 | 3030.74 | 24.9478 |
| v62 | 3083.73 | 18.4943 | 3088.53 | 14.8719 |
| v63 | 3122.46 | 6.8359  | 3090.74 | 14.5736 |
| v64 | 3146.73 | 10.4483 | 3131.13 | 14.056  |
| v65 | 3153.48 | 25.6111 | 3133    | 9.0324  |
| v66 | 3183.85 | 5.4766  | 3164    | 12.8798 |
| v67 | 3190.67 | 6.503   | 3190.89 | 1.4546  |
| v68 | 3197.48 | 2.6952  | 3192.91 | 19.3101 |
| v69 | 3199.99 | 10.574  | 3198.78 | 2.2836  |
| v70 | 3209.52 | 7.6273  | 3208.74 | 11.9992 |
| v71 | 3214.97 | 21.5747 | 3215.2  | 18.9702 |
| v72 | 3222.44 | 16.4974 | 3222.26 | 10.4735 |

|     | <b>tsi13i26</b> |         | <b>tsi13p8</b> |         |
|-----|-----------------|---------|----------------|---------|
| v1  | -546.02         | 28.0609 | -735.88        | 28.6121 |
| v2  | 32.48           | 0.0189  | 13.74          | 0.119   |
| v3  | 37.44           | 0.1052  | 31.19          | 0.2638  |
| v4  | 44.96           | 0.3119  | 72.74          | 1.3444  |
| v5  | 95              | 1.6553  | 104.68         | 0.699   |
| v6  | 123.54          | 0.2586  | 111.14         | 0.5468  |
| v7  | 152.31          | 1.1087  | 159.75         | 1.4796  |
| v8  | 206.33          | 0.0366  | 201.57         | 1.0043  |
| v9  | 259.07          | 0.5629  | 207.67         | 1.8176  |
| v10 | 294.35          | 2.4498  | 238.48         | 5.813   |
| v11 | 359.29          | 4.3026  | 308.71         | 4.4424  |
| v12 | 383.65          | 3.4803  | 325.13         | 14.6305 |
| v13 | 417.62          | 0.0151  | 355.74         | 2.6179  |
| v14 | 471.46          | 5.6606  | 399.94         | 1.738   |
| v15 | 498.62          | 0.7619  | 412.25         | 6.9066  |
| v16 | 538.11          | 2.0952  | 416.86         | 0.0389  |
| v17 | 563.37          | 0.6107  | 482.38         | 9.0361  |
| v18 | 634.23          | 15.7726 | 535.97         | 2.557   |
| v19 | 642.53          | 0.0155  | 549.29         | 0.8977  |
| v20 | 696.76          | 18.1203 | 585.87         | 7.2198  |
| v21 | 716.39          | 31.6706 | 641.68         | 0.0934  |
| v22 | 751.54          | 13.0202 | 680.96         | 4.8979  |
| v23 | 785.22          | 43.2935 | 718.9          | 34.1627 |
| v24 | 796.24          | 4.4423  | 761.87         | 0.519   |

|     |         |         |         |         |
|-----|---------|---------|---------|---------|
| v25 | 870.09  | 0.0388  | 790.9   | 16.9126 |
| v26 | 900.3   | 1.9888  | 792.56  | 30.6979 |
| v27 | 921.48  | 4.9827  | 869.72  | 18.6341 |
| v28 | 947.21  | 3.727   | 875.17  | 0.8213  |
| v29 | 954.15  | 4.7271  | 946.74  | 21.605  |
| v30 | 992.91  | 2.0667  | 958.06  | 2.9176  |
| v31 | 1009.54 | 6.5305  | 983.56  | 12.4851 |
| v32 | 1009.89 | 0.2689  | 991.45  | 8.9027  |
| v33 | 1012.83 | 1.9435  | 1012.64 | 0.0852  |
| v34 | 1023.24 | 1.8369  | 1026.24 | 25.8769 |
| v35 | 1027.33 | 0.124   | 1027.27 | 0.0631  |
| v36 | 1062.46 | 3.6368  | 1032.3  | 0.272   |
| v37 | 1109.73 | 4.0741  | 1064.6  | 5.1767  |
| v38 | 1113.67 | 5.8693  | 1072.11 | 0.2501  |
| v39 | 1151.28 | 2.579   | 1106.64 | 0.8244  |
| v40 | 1188.51 | 0.0142  | 1114.41 | 5.5485  |
| v41 | 1193.85 | 1.5444  | 1165.13 | 0.2121  |
| v42 | 1208.56 | 1.9379  | 1190.3  | 0.0531  |
| v43 | 1212.41 | 2.3256  | 1212.74 | 0.105   |
| v44 | 1276.27 | 9.9743  | 1241.47 | 4.8725  |
| v45 | 1313.67 | 0.0133  | 1302.74 | 4.3848  |
| v46 | 1340.26 | 1.2696  | 1313.46 | 1.5886  |
| v47 | 1354.55 | 7.7798  | 1317.33 | 0.1751  |
| v48 | 1360.38 | 0.1237  | 1344.3  | 1.8909  |
| v49 | 1409.91 | 8.4195  | 1361.87 | 0.3565  |
| v50 | 1424.04 | 5.611   | 1420.07 | 5.372   |
| v51 | 1474.39 | 5.3704  | 1447.95 | 10.0706 |
| v52 | 1487.28 | 8.468   | 1483.19 | 7.1753  |
| v53 | 1489.94 | 6.5705  | 1492.53 | 6.2632  |
| v54 | 1492.96 | 4.6823  | 1495.03 | 23.8424 |
| v55 | 1538.23 | 38.767  | 1544.94 | 31.124  |
| v56 | 1635.24 | 2.5856  | 1590.2  | 14.0298 |
| v57 | 1663.56 | 34.6127 | 1646.17 | 1.5112  |
| v58 | 1706.57 | 14.3525 | 1678.98 | 12.2948 |
| v59 | 2163.97 | 43.3785 | 1706.2  | 38.5112 |
| v60 | 3011.55 | 39.7817 | 2344.69 | 1.0725  |
| v61 | 3031.87 | 21.3439 | 3039.42 | 31.7469 |
| v62 | 3075.33 | 11.7412 | 3095.44 | 14.1338 |
| v63 | 3084.54 | 12.357  | 3128.65 | 4.6363  |

|                 |         |         |                |         |
|-----------------|---------|---------|----------------|---------|
| v64             | 3121.89 | 8.4475  | 3151.88        | 24.41   |
| v65             | 3131.74 | 28.7827 | 3166.8         | 5.1661  |
| v66             | 3154.83 | 17.2329 | 3178.29        | 7.8007  |
| v67             | 3190.6  | 3.0909  | 3192.63        | 1.5347  |
| v68             | 3198.32 | 3.3889  | 3198.58        | 11.848  |
| v69             | 3205.36 | 25.2245 | 3201.28        | 2.6389  |
| v70             | 3209.79 | 11.7941 | 3211.11        | 13.227  |
| v71             | 3215.92 | 19.884  | 3218.44        | 17.5677 |
| v72             | 3222.38 | 10.7608 | 3224.14        | 9.8706  |
| <b>tsi14i16</b> |         |         | <b>tsi14p8</b> |         |
| v1              | -385.73 | 3.1887  | -751.75        | 15.3737 |
| v2              | 38.5    | 0.0168  | 18.58          | 0.1662  |
| v3              | 69.16   | 0.3205  | 32.07          | 0.4083  |
| v4              | 75.76   | 0.109   | 70.78          | 2.5322  |
| v5              | 155.77  | 0.9643  | 86.69          | 2.1051  |
| v6              | 164.86  | 0.5749  | 106.54         | 0.3696  |
| v7              | 213.06  | 0.119   | 112.79         | 3.5975  |
| v8              | 227.08  | 2.9352  | 177.83         | 2.0223  |
| v9              | 297.71  | 2.7913  | 207.4          | 0.1066  |
| v10             | 310.38  | 1.7622  | 212.45         | 0.6653  |
| v11             | 359.65  | 1.4523  | 271.92         | 4.2191  |
| v12             | 417.27  | 0.0356  | 344.13         | 2.5026  |
| v13             | 448.5   | 1.5745  | 395.87         | 1.1196  |
| v14             | 491.35  | 9.4307  | 416.46         | 0.0806  |
| v15             | 515.66  | 6.7438  | 420.76         | 2.3267  |
| v16             | 531.43  | 0.429   | 462.85         | 13.8332 |
| v17             | 583.1   | 5.5261  | 488.4          | 23.2901 |
| v18             | 636.15  | 0.3185  | 527.14         | 0.5436  |
| v19             | 712.9   | 36.7531 | 561.89         | 1.9854  |
| v20             | 720.96  | 39.8159 | 586.37         | 2.3198  |
| v21             | 761.45  | 5.513   | 642            | 0.2336  |
| v22             | 773.12  | 9.9384  | 694.14         | 12.7797 |
| v23             | 781.13  | 26.4428 | 717.41         | 33.0843 |
| v24             | 864.09  | 0.0388  | 754.08         | 2.5554  |
| v25             | 878.65  | 8.9997  | 772.33         | 13.1739 |
| v26             | 889.12  | 6.7829  | 790.38         | 47.8589 |
| v27             | 924.18  | 2.241   | 865.32         | 11.628  |
| v28             | 935.91  | 0.3017  | 874.29         | 0.0835  |

|     |         |         |         |         |
|-----|---------|---------|---------|---------|
| v29 | 958.64  | 26.8287 | 946.67  | 25.0189 |
| v30 | 982.41  | 5.1676  | 957.76  | 3.5856  |
| v31 | 998.94  | 0.8678  | 991.38  | 7.3685  |
| v32 | 1007.09 | 0.023   | 998.28  | 13.1241 |
| v33 | 1016.64 | 0.5881  | 1013.59 | 0.0041  |
| v34 | 1023.56 | 0.085   | 1026.57 | 0.074   |
| v35 | 1051.29 | 6.4702  | 1033.2  | 0.0315  |
| v36 | 1058.41 | 3.3266  | 1034.79 | 20.7301 |
| v37 | 1093.21 | 2.3947  | 1064.15 | 4.5074  |
| v38 | 1112.62 | 5.0045  | 1076.44 | 0.6261  |
| v39 | 1138.58 | 1.1234  | 1104.46 | 0.6464  |
| v40 | 1171.88 | 6.2374  | 1115.07 | 5.5134  |
| v41 | 1184.79 | 0.082   | 1165.49 | 0.3053  |
| v42 | 1213.54 | 0.1851  | 1190.76 | 0.0743  |
| v43 | 1236.34 | 1.3671  | 1212.59 | 0.2175  |
| v44 | 1299.78 | 1.102   | 1253.2  | 2.2839  |
| v45 | 1308.09 | 0.9069  | 1306.54 | 3.4147  |
| v46 | 1332.93 | 2.9976  | 1317.39 | 0.13    |
| v47 | 1342.94 | 1.9127  | 1318.83 | 2.4399  |
| v48 | 1357.25 | 0.1319  | 1347.73 | 2.3398  |
| v49 | 1422.17 | 3.0489  | 1362.14 | 0.437   |
| v50 | 1458.31 | 2.1787  | 1420.71 | 5.498   |
| v51 | 1483.25 | 5.6578  | 1444.54 | 2.8024  |
| v52 | 1486.24 | 5.21    | 1483.85 | 6.84    |
| v53 | 1499.08 | 9.2774  | 1491.83 | 5.8252  |
| v54 | 1520.11 | 26.0324 | 1496.22 | 19.2941 |
| v55 | 1573.63 | 7.7087  | 1543.91 | 26.9442 |
| v56 | 1619.87 | 2.8759  | 1642.88 | 1.8375  |
| v57 | 1641.37 | 15.9498 | 1668.61 | 12.2091 |
| v58 | 1650.16 | 5.4971  | 1677.32 | 0.772   |
| v59 | 1752.83 | 0.3892  | 1746.82 | 41.6368 |
| v60 | 3042.9  | 25.6236 | 2250.84 | 11.645  |
| v61 | 3093.38 | 16.3788 | 3039.83 | 30.6214 |
| v62 | 3105.39 | 8.8036  | 3096.07 | 14.7889 |
| v63 | 3129.31 | 11.2874 | 3128.68 | 3.9739  |
| v64 | 3147.64 | 9.9474  | 3150.3  | 27.1408 |
| v65 | 3168.33 | 13.5064 | 3167.97 | 0.7338  |
| v66 | 3172.74 | 12.5541 | 3175.3  | 12.18   |
| v67 | 3189.08 | 4.0692  | 3193.53 | 1.3764  |

|                 |          |                |         |         |
|-----------------|----------|----------------|---------|---------|
| v68             | 3194.66  | 31.7351        | 3202.26 | 2.7276  |
| v69             | 3195.09  | 1.8511         | 3207.15 | 15.0795 |
| v70             | 3206.6   | 6.4323         | 3211.81 | 12.3918 |
| v71             | 3211.77  | 22.0074        | 3219.37 | 15.4508 |
| v72             | 3220.82  | 15.4016        | 3224.97 | 9.7585  |
| <b>tsi15i16</b> |          | <b>tsi16p7</b> |         |         |
| v1              | -1704.88 | 55.8271        | -911.82 | 1.3412  |
| v2              | 20.77    | 0.0765         | 52.01   | 0.0515  |
| v3              | 57.64    | 0.7563         | 85.62   | 0.706   |
| v4              | 116.34   | 1.2604         | 109.44  | 0.278   |
| v5              | 163.86   | 1.3389         | 146.3   | 0.3581  |
| v6              | 221.13   | 0.9533         | 187.14  | 1.5167  |
| v7              | 243.17   | 0.9495         | 277.44  | 0.2179  |
| v8              | 251.31   | 0.0758         | 298.15  | 0.2951  |
| v9              | 338.71   | 2.9828         | 332.34  | 0.4361  |
| v10             | 388.82   | 6.8326         | 404.95  | 2.0063  |
| v11             | 417.32   | 0.3029         | 422.18  | 0.3408  |
| v12             | 431.03   | 12.4359        | 437.78  | 0.3445  |
| v13             | 466.51   | 5.9474         | 475.18  | 5.562   |
| v14             | 509.54   | 5.8866         | 507.34  | 1.7751  |
| v15             | 555.9    | 19.0314        | 545.9   | 14.5866 |
| v16             | 605.59   | 3.5881         | 575.73  | 2.1209  |
| v17             | 638.57   | 0.8147         | 584.96  | 0.4234  |
| v18             | 659.28   | 20.9135        | 634.58  | 2.8548  |
| v19             | 712.82   | 18.8088        | 640.39  | 0.4723  |
| v20             | 729.9    | 5.9865         | 730.04  | 2.0765  |
| v21             | 731.1    | 63.415         | 731.56  | 40.7793 |
| v22             | 796.32   | 24.4709        | 765.99  | 11.6655 |
| v23             | 815.98   | 39.9999        | 772.6   | 54.8111 |
| v24             | 838.76   | 23.4339        | 806.08  | 13.0978 |
| v25             | 865.65   | 1.5432         | 828.6   | 0.3402  |
| v26             | 920.92   | 24.7696        | 882.69  | 0.0999  |
| v27             | 946.55   | 1.6986         | 901.86  | 0.1643  |
| v28             | 980.76   | 6.3937         | 960.98  | 2.2524  |
| v29             | 984.94   | 1.5663         | 986.24  | 0.7001  |
| v30             | 1008.93  | 0.6158         | 1013.7  | 0.6903  |
| v31             | 1011.72  | 1.9982         | 1017.09 | 0.1035  |
| v32             | 1022.5   | 0.8861         | 1019.76 | 0.2103  |



|     |         |         |         |         |
|-----|---------|---------|---------|---------|
| v33 | 1025.07 | 9.6021  | 1029.06 | 0.2308  |
| v34 | 1028.68 | 0.0707  | 1032.94 | 0.9712  |
| v35 | 1067.22 | 3.9483  | 1034.6  | 7.9177  |
| v36 | 1090.16 | 5.1607  | 1065.64 | 5.7746  |
| v37 | 1107.13 | 1.1743  | 1073.02 | 1.4915  |
| v38 | 1116.99 | 7.0783  | 1084.29 | 4.0721  |
| v39 | 1168.96 | 7.6793  | 1115.13 | 5.819   |
| v40 | 1188.31 | 0.1748  | 1157.8  | 3.2946  |
| v41 | 1204.14 | 2.5647  | 1189.17 | 0.0199  |
| v42 | 1221.76 | 0.1749  | 1191.14 | 0.069   |
| v43 | 1235.58 | 22.0382 | 1215.68 | 0.6517  |
| v44 | 1293.08 | 0.3512  | 1228.42 | 1.7102  |
| v45 | 1314.51 | 2.2062  | 1295.02 | 1.7262  |
| v46 | 1325.74 | 1.3213  | 1303.36 | 0.5153  |
| v47 | 1343.38 | 9.953   | 1323.5  | 0.0142  |
| v48 | 1373.33 | 9.1302  | 1334.05 | 0.1621  |
| v49 | 1399.46 | 1.9445  | 1363.89 | 1.0961  |
| v50 | 1408.23 | 18.8112 | 1428.18 | 4.5787  |
| v51 | 1417.24 | 13.3944 | 1477.53 | 5.4378  |
| v52 | 1484.78 | 36.6072 | 1487.52 | 2.6554  |
| v53 | 1496.53 | 6.614   | 1501.66 | 9.6535  |
| v54 | 1500.81 | 11.5184 | 1504    | 8.2384  |
| v55 | 1506.76 | 13.5499 | 1526.08 | 35.2432 |
| v56 | 1541.13 | 16.1883 | 1552.65 | 2.659   |
| v57 | 1642.45 | 4.1218  | 1618.62 | 0.5328  |
| v58 | 1668.02 | 4.9888  | 1651.65 | 2.4174  |
| v59 | 1686.99 | 6.0665  | 1659.95 | 1.52    |
| v60 | 2116.78 | 22.3518 | 1681.47 | 5.0826  |
| v61 | 3044.17 | 33.3082 | 3056.63 | 19.3296 |
| v62 | 3065.12 | 9.8775  | 3128.2  | 12.9984 |
| v63 | 3120.91 | 22.2716 | 3170.45 | 11.3253 |
| v64 | 3133.39 | 16.3293 | 3183.89 | 2.5169  |
| v65 | 3163.88 | 8.585   | 3187.5  | 4.7677  |
| v66 | 3172.56 | 10.6194 | 3189.35 | 0.721   |
| v67 | 3187.37 | 3.2347  | 3193.43 | 2.134   |
| v68 | 3195.21 | 6.9244  | 3198.88 | 4.9883  |
| v69 | 3207.08 | 26.9051 | 3205.52 | 17.9886 |
| v70 | 3207.67 | 9.9367  | 3207.82 | 22.4924 |
| v71 | 3213.7  | 24.6759 | 3218.83 | 27.8542 |

| v72 | 3220.29         | 15.238  | 3219.34         | 8.8048  |
|-----|-----------------|---------|-----------------|---------|
|     | <b>tsi17i26</b> |         | <b>tsi17i18</b> |         |
| v1  | -585.1          | 14.362  | -1889.06        | 781.312 |
| v2  | 27.93           | 0.0052  | 34.27           | 0.053   |
| v3  | 48.06           | 0.528   | 41.14           | 0.1294  |
| v4  | 51.48           | 0.1513  | 57.33           | 1.5059  |
| v5  | 74.52           | 0.8552  | 120.45          | 0.3575  |
| v6  | 171.58          | 0.9018  | 138.19          | 0.5328  |
| v7  | 196.86          | 0.3502  | 161.33          | 0.2135  |
| v8  | 236.58          | 0.3038  | 190.54          | 1.4869  |
| v9  | 263.93          | 0.3407  | 207.38          | 0.615   |
| v10 | 316.22          | 2.12    | 236.41          | 0.4195  |
| v11 | 358.5           | 4.435   | 295.82          | 1.8412  |
| v12 | 401.19          | 2.0816  | 376.63          | 3.4711  |
| v13 | 417.44          | 0.0003  | 414.44          | 0.2981  |
| v14 | 487.09          | 0.5348  | 419.91          | 1.5676  |
| v15 | 498.75          | 0.8644  | 468.28          | 10.1128 |
| v16 | 538.16          | 1.2447  | 511.24          | 6.8469  |
| v17 | 543.21          | 1.1689  | 535.12          | 1.4459  |
| v18 | 589.4           | 1.2233  | 602.83          | 15.021  |
| v19 | 642.98          | 0.0642  | 627.68          | 8.9505  |
| v20 | 677.52          | 30.8564 | 642.46          | 0.4427  |
| v21 | 701.67          | 10.6433 | 653.79          | 12.9416 |
| v22 | 716.58          | 31.8387 | 698.59          | 10.1558 |
| v23 | 753.42          | 4.4811  | 712.83          | 30.8494 |
| v24 | 786.13          | 46.422  | 777.47          | 48.5381 |
| v25 | 801.55          | 3.4673  | 796.45          | 2.2158  |
| v26 | 871.14          | 0.0055  | 832.76          | 19.8622 |
| v27 | 878.99          | 1.2364  | 862.62          | 0.1442  |
| v28 | 950.14          | 3.429   | 886.7           | 2.7319  |
| v29 | 957.72          | 0.9269  | 897.31          | 50.8029 |
| v30 | 960.91          | 1.2339  | 934.99          | 3.5849  |
| v31 | 1010.57         | 0.0055  | 974.02          | 1.0653  |
| v32 | 1023.7          | 0.376   | 1004.96         | 0.0219  |
| v33 | 1028.61         | 0.1909  | 1018.11         | 4.0091  |
| v34 | 1029.02         | 5.5167  | 1022.96         | 0.0156  |
| v35 | 1044.51         | 1.8464  | 1030.34         | 16.8769 |
| v36 | 1063.12         | 3.5036  | 1055.36         | 8.0184  |

|       |                 |         |                |         |
|-------|-----------------|---------|----------------|---------|
| v37   | 1070.93         | 5.1146  | 1060.36        | 1.1442  |
| v38   | 1109.91         | 3.297   | 1079.87        | 10.238  |
| v39   | 1114.03         | 6.1391  | 1115.29        | 5.7875  |
| v40   | 1134.62         | 7.3828  | 1143.1         | 3.0427  |
| v41   | 1188.74         | 0.0003  | 1187.59        | 0.1845  |
| v42   | 1197.5          | 0.5983  | 1209.24        | 6.5613  |
| v43   | 1209.7          | 0.8455  | 1229.98        | 15.1185 |
| v44   | 1273.36         | 5.5741  | 1264.02        | 23.2244 |
| v45   | 1313.91         | 2.2055  | 1311.9         | 0.4544  |
| v46   | 1315.03         | 0.3792  | 1319           | 4.7505  |
| v47   | 1336.02         | 12.3623 | 1361.87        | 0.0084  |
| v48   | 1360.74         | 0.1765  | 1382.48        | 5.652   |
| v49   | 1393.63         | 5.1     | 1424.82        | 1.7058  |
| v50   | 1416.44         | 3.3778  | 1434.87        | 5.1502  |
| v51   | 1475.85         | 2.1214  | 1488.5         | 3.2644  |
| v52   | 1490.47         | 4.2001  | 1491.95        | 12.0779 |
| v53   | 1498.9          | 7.2449  | 1498.41        | 1.0766  |
| v54   | 1505.02         | 3.3029  | 1519.68        | 52.3872 |
| v55   | 1539.45         | 35.0275 | 1538.26        | 23.7148 |
| v56   | 1637.34         | 2.2709  | 1611.19        | 10.846  |
| v57   | 1665.86         | 25.0347 | 1628.49        | 3.2472  |
| v58   | 1694.8          | 9.8296  | 1656.66        | 46.6898 |
| v59   | 2159.64         | 15.8188 | 1799.49        | 46.9478 |
| v60   | 3011.72         | 13.4388 | 2155.83        | 34.6574 |
| v61   | 3052.63         | 31.3842 | 3052.56        | 32.3039 |
| v62   | 3129.13         | 23.4474 | 3122.83        | 12.562  |
| v63   | 3140.64         | 19.2915 | 3145.16        | 6.9561  |
| v64   | 3142.6          | 17.2188 | 3154.23        | 7.3863  |
| v65   | 3146.21         | 11.3026 | 3163.29        | 6.3356  |
| v66   | 3191.18         | 2.7384  | 3179.42        | 13.7337 |
| v67   | 3199.1          | 3.768   | 3191.42        | 6.5054  |
| v68   | 3199.13         | 22.3112 | 3198.27        | 2.5384  |
| v69   | 3210.27         | 11.9492 | 3210.13        | 7.2048  |
| v70   | 3216.6          | 19.3863 | 3215.54        | 21.1767 |
| v71   | 3222.83         | 10.9095 | 3223.04        | 16.8066 |
| v72   | 3229.39         | 4.9053  | 3251.65        | 10.0707 |
| <hr/> |                 |         |                |         |
|       | <b>tsi17i19</b> |         | <b>tsi17p9</b> |         |
| v1    | -677.02         | 21.4136 | -865.98        | 5.6828  |

|     |         |         |         |         |
|-----|---------|---------|---------|---------|
| v2  | 23.42   | 0.0789  | 9.28    | 0.0371  |
| v3  | 61.07   | 0.6705  | 40.61   | 0.2707  |
| v4  | 80.42   | 1.2542  | 68.88   | 1.8554  |
| v5  | 109.36  | 0.1579  | 124.17  | 0.1161  |
| v6  | 191.54  | 0.1903  | 129.06  | 0.5296  |
| v7  | 235.48  | 0.063   | 172.85  | 0.4272  |
| v8  | 249.5   | 0.2439  | 211.56  | 1.658   |
| v9  | 267.41  | 0.3846  | 215.93  | 1.1921  |
| v10 | 304.02  | 3.0628  | 232.2   | 1.4238  |
| v11 | 418.28  | 0.0829  | 308.17  | 1.4696  |
| v12 | 451.08  | 0.951   | 353.43  | 16.7595 |
| v13 | 466.32  | 4.0502  | 401.62  | 4.9303  |
| v14 | 482.22  | 2.0362  | 416.57  | 0.0027  |
| v15 | 510.55  | 26.298  | 425.13  | 1.5651  |
| v16 | 535.48  | 7.6866  | 450.72  | 18.0262 |
| v17 | 574.48  | 8.3766  | 481.58  | 16.502  |
| v18 | 636.19  | 4.5203  | 538.9   | 2.814   |
| v19 | 653.44  | 9.7045  | 546.66  | 4.5162  |
| v20 | 690.95  | 23.8595 | 597.05  | 8.2253  |
| v21 | 718.53  | 14.9201 | 632.12  | 2.0602  |
| v22 | 722.68  | 22.1593 | 649.26  | 1.1463  |
| v23 | 759.73  | 12.6181 | 686.23  | 4.1587  |
| v24 | 789.35  | 44.9445 | 701.7   | 1.5875  |
| v25 | 847.08  | 0.7181  | 718.78  | 34.6666 |
| v26 | 876.5   | 0.1177  | 791.82  | 39.1311 |
| v27 | 887.33  | 3.0537  | 874.07  | 0.0009  |
| v28 | 940.84  | 0.3971  | 891.97  | 0.0945  |
| v29 | 960.56  | 2.3718  | 900.56  | 2.5207  |
| v30 | 963.6   | 4.2546  | 955.79  | 47.6421 |
| v31 | 1010.08 | 4.44    | 958.99  | 4.8062  |
| v32 | 1014.32 | 0.0311  | 972.98  | 2.6045  |
| v33 | 1028.7  | 0.2474  | 1012.38 | 0.0198  |
| v34 | 1032.3  | 0.0381  | 1027.49 | 0.1468  |
| v35 | 1050.29 | 0.3917  | 1032.99 | 0.0104  |
| v36 | 1065.64 | 4.8057  | 1043.35 | 10.5266 |
| v37 | 1079.57 | 1.6985  | 1052.27 | 17.9739 |
| v38 | 1108.86 | 6.0978  | 1063.75 | 2.9556  |
| v39 | 1113.92 | 5.609   | 1068.54 | 6.9208  |
| v40 | 1133.99 | 6.8935  | 1114.71 | 5.8728  |

|     |         |         |         |         |
|-----|---------|---------|---------|---------|
| v41 | 1189.86 | 0.0374  | 1143.05 | 4.5194  |
| v42 | 1212.37 | 0.2195  | 1190.95 | 0.0587  |
| v43 | 1244.94 | 0.9142  | 1212.32 | 0.2866  |
| v44 | 1272.39 | 1.8968  | 1235.95 | 1.8996  |
| v45 | 1317.88 | 0.297   | 1282.17 | 0.598   |
| v46 | 1319.3  | 0.699   | 1318.05 | 0.2554  |
| v47 | 1343.92 | 3.3488  | 1330.33 | 1.8424  |
| v48 | 1360.49 | 0.8405  | 1361.85 | 0.511   |
| v49 | 1400.7  | 2.6218  | 1390.02 | 19.5732 |
| v50 | 1417.16 | 5.4783  | 1421.68 | 6.5955  |
| v51 | 1491.78 | 4.722   | 1458.57 | 21.2824 |
| v52 | 1492.99 | 2.8246  | 1486.12 | 6.6004  |
| v53 | 1500.38 | 3.7913  | 1492.91 | 5.4715  |
| v54 | 1502.98 | 6.9312  | 1501.73 | 2.3026  |
| v55 | 1543.43 | 22.199  | 1546.48 | 29.8925 |
| v56 | 1647.78 | 3.7498  | 1588.35 | 6.7209  |
| v57 | 1649.14 | 4.3446  | 1646.85 | 1.7205  |
| v58 | 1677.53 | 9.1124  | 1676.6  | 4.3154  |
| v59 | 2087.24 | 0.1803  | 1679.07 | 11.6984 |
| v60 | 3052.94 | 35.9416 | 2344.82 | 5.7426  |
| v61 | 3055.43 | 15.0753 | 3052.96 | 21.1437 |
| v62 | 3132.87 | 19.5824 | 3125.24 | 10.0788 |
| v63 | 3136.97 | 26.6636 | 3152.79 | 11.3063 |
| v64 | 3140.47 | 9.5495  | 3155.74 | 6.8651  |
| v65 | 3149.25 | 11.1546 | 3171.72 | 6.5641  |
| v66 | 3189.61 | 20.1893 | 3182.22 | 5.8326  |
| v67 | 3191.29 | 0.909   | 3193.5  | 1.3867  |
| v68 | 3199.46 | 2.9238  | 3202.07 | 2.5118  |
| v69 | 3209.39 | 13.8846 | 3211.84 | 12.2013 |
| v70 | 3216.74 | 17.6022 | 3218.9  | 17.1398 |
| v71 | 3222.99 | 9.6119  | 3224.7  | 9.8996  |
| v72 | 3232.61 | 5.58    | 3250.46 | 8.4637  |

---

|    | <b>tsi18i20</b> |        | <b>tsi18p9</b> |        |
|----|-----------------|--------|----------------|--------|
| v1 | -373.06         | 2.6435 | -748.95        | 10.819 |
| v2 | 36.97           | 0.0474 | 20.08          | 0.0338 |
| v3 | 63.69           | 0.3351 | 39.46          | 0.5724 |
| v4 | 73.21           | 0.4568 | 67.44          | 1.7661 |
| v5 | 142.82          | 1.0807 | 107.66         | 1.1008 |

|     |         |         |         |         |
|-----|---------|---------|---------|---------|
| v6  | 175.61  | 0.0924  | 123.1   | 0.2214  |
| v7  | 201.52  | 0.2204  | 149.09  | 5.5982  |
| v8  | 229.15  | 0.1338  | 165.7   | 0.4088  |
| v9  | 259.46  | 0.1693  | 223.98  | 1.3771  |
| v10 | 331.9   | 2.8572  | 237.01  | 0.4605  |
| v11 | 363     | 1.1524  | 240.66  | 0.2835  |
| v12 | 416.23  | 0.081   | 307.55  | 1.5499  |
| v13 | 428.12  | 2.8683  | 379.71  | 2.2961  |
| v14 | 476.46  | 7.1816  | 415.78  | 0.0218  |
| v15 | 512.77  | 5.1101  | 434.42  | 0.5045  |
| v16 | 540.14  | 9.7663  | 463.07  | 10.3068 |
| v17 | 582.71  | 4.0612  | 486.77  | 28.3918 |
| v18 | 632.03  | 6.5568  | 535.68  | 1.2296  |
| v19 | 635.99  | 0.4498  | 550.12  | 1.2975  |
| v20 | 696.11  | 27.7005 | 605.39  | 3.6794  |
| v21 | 712.2   | 33.1793 | 627.42  | 3.4103  |
| v22 | 780.22  | 36.3221 | 646.84  | 1.1902  |
| v23 | 806.64  | 5.359   | 698.56  | 7.1918  |
| v24 | 841.34  | 15.9169 | 710.23  | 7.6273  |
| v25 | 863.4   | 0.0916  | 716.32  | 35.6977 |
| v26 | 884.13  | 1.0525  | 790     | 44.7962 |
| v27 | 911.4   | 9.2285  | 872.5   | 0.0072  |
| v28 | 936.73  | 0.7015  | 892.48  | 1.337   |
| v29 | 954.15  | 32.5059 | 916.74  | 0.5735  |
| v30 | 983.81  | 0.7166  | 957.03  | 2.2368  |
| v31 | 1003.75 | 3.166   | 963.83  | 48.9967 |
| v32 | 1006.61 | 0.0035  | 970.6   | 0.4932  |
| v33 | 1015.11 | 0.6289  | 1012.19 | 0.0052  |
| v34 | 1023.54 | 0.0511  | 1026.06 | 0.0831  |
| v35 | 1033.28 | 2.7333  | 1033    | 0.0064  |
| v36 | 1058.17 | 5.6451  | 1046.44 | 9.6965  |
| v37 | 1070.71 | 1.6577  | 1055.31 | 13.98   |
| v38 | 1113.23 | 5.8732  | 1062.92 | 2.5274  |
| v39 | 1128.13 | 1.4499  | 1077.02 | 5.147   |
| v40 | 1171.07 | 4.6842  | 1115.31 | 5.9134  |
| v41 | 1185.61 | 0.0882  | 1144.77 | 1.998   |
| v42 | 1193.72 | 4.5129  | 1190.77 | 0.0808  |
| v43 | 1217.88 | 0.8442  | 1211.24 | 0.3869  |
| v44 | 1298.76 | 0.4379  | 1234.44 | 1.0031  |

|     |         |         |         |         |
|-----|---------|---------|---------|---------|
| v45 | 1308.67 | 0.5883  | 1289.6  | 1.1994  |
| v46 | 1338.06 | 2.7874  | 1318.31 | 0.3488  |
| v47 | 1357.87 | 0.2512  | 1334.02 | 2.2797  |
| v48 | 1394.47 | 4.703   | 1361.85 | 0.5975  |
| v49 | 1423.15 | 2.1119  | 1387.31 | 7.9919  |
| v50 | 1463.19 | 3.0301  | 1420.75 | 9.8549  |
| v51 | 1483.79 | 3.6317  | 1463.57 | 13.4843 |
| v52 | 1487.56 | 9.513   | 1480.55 | 9.8354  |
| v53 | 1500.89 | 11.5737 | 1492.09 | 5.562   |
| v54 | 1521.28 | 24.6253 | 1500.72 | 3.3116  |
| v55 | 1594.39 | 7.0442  | 1543.89 | 25.3678 |
| v56 | 1620.64 | 2.7305  | 1642.87 | 1.7852  |
| v57 | 1640.94 | 9.6158  | 1670.78 | 7.2678  |
| v58 | 1651.33 | 6.8328  | 1679.13 | 0.4033  |
| v59 | 1755.44 | 4.9884  | 1730.48 | 9.0965  |
| v60 | 3040.29 | 30.4238 | 2248.18 | 12.0334 |
| v61 | 3071.75 | 19.3621 | 3046.22 | 24.629  |
| v62 | 3097.35 | 17.3736 | 3108.85 | 10.6033 |
| v63 | 3137.48 | 16.8881 | 3143.02 | 16.7518 |
| v64 | 3150.92 | 10.7589 | 3154.16 | 6.8093  |
| v65 | 3160.53 | 30.385  | 3167    | 9.5844  |
| v66 | 3169.39 | 8.8651  | 3184.03 | 4.815   |
| v67 | 3188.96 | 3.7278  | 3194.2  | 1.4103  |
| v68 | 3195.36 | 2.2226  | 3202.87 | 2.6085  |
| v69 | 3206.97 | 7.2025  | 3212.45 | 11.1751 |
| v70 | 3212.18 | 22.0999 | 3219.63 | 15.5964 |
| v71 | 3220.66 | 15.3947 | 3225.24 | 10.1342 |
| v72 | 3251.4  | 6.5797  | 3247.62 | 9.605   |

|    | <b>tsi19i20</b> |         | <b>tsi20p3</b> |        |
|----|-----------------|---------|----------------|--------|
| v1 | -1542.6         | 16.9063 | -812.64        | 5.9054 |
| v2 | 29.8            | 0.1065  | 50.45          | 0.2656 |
| v3 | 67.64           | 1.5591  | 60.81          | 0.0939 |
| v4 | 103.68          | 0.6866  | 93.09          | 0.8668 |
| v5 | 190.68          | 1.7991  | 122.06         | 0.5998 |
| v6 | 199.42          | 1.062   | 200.63         | 1.6831 |
| v7 | 222.25          | 2.129   | 254.04         | 0.042  |
| v8 | 291.18          | 1.455   | 296.93         | 0.2338 |
| v9 | 305.41          | 1.6852  | 330.67         | 1.7208 |

|     |         |         |         |         |
|-----|---------|---------|---------|---------|
| v10 | 348.07  | 1.2428  | 348.87  | 2.038   |
| v11 | 418.04  | 0.0442  | 404.5   | 0.8003  |
| v12 | 435.46  | 6.4543  | 416.94  | 1.1797  |
| v13 | 455.28  | 1.0755  | 427.64  | 1.6657  |
| v14 | 505.54  | 22.6674 | 492.11  | 1.5184  |
| v15 | 556.15  | 7.6171  | 520.25  | 3.6736  |
| v16 | 598.84  | 6.4029  | 547.19  | 1.7928  |
| v17 | 617.5   | 3.9817  | 607.16  | 4.7438  |
| v18 | 638.62  | 0.4303  | 634.92  | 3.4712  |
| v19 | 687.49  | 4.3484  | 641.95  | 0.8076  |
| v20 | 714.78  | 35.9905 | 726.97  | 33.1856 |
| v21 | 742.75  | 72.0962 | 731.19  | 5.5193  |
| v22 | 789.58  | 27.4393 | 749.47  | 3.8337  |
| v23 | 819.64  | 13.6685 | 795.87  | 58.293  |
| v24 | 864.93  | 0.6667  | 826.38  | 14.7932 |
| v25 | 893.09  | 23.8939 | 877.62  | 0.6693  |
| v26 | 915.59  | 6.6691  | 882.98  | 1.595   |
| v27 | 942.77  | 5.6659  | 929.8   | 3.0422  |
| v28 | 955.43  | 17.9146 | 958.15  | 1.7117  |
| v29 | 988.62  | 8.6007  | 979.35  | 1.6556  |
| v30 | 993.59  | 36.8783 | 1013.21 | 0.2686  |
| v31 | 1007.96 | 0.9818  | 1014.63 | 2.2072  |
| v32 | 1015.68 | 2.6012  | 1017.82 | 0.2418  |
| v33 | 1022.58 | 1.2475  | 1028.14 | 0.3407  |
| v34 | 1028.24 | 0.3714  | 1031.44 | 0.0404  |
| v35 | 1051.83 | 9.7626  | 1037.3  | 1.9322  |
| v36 | 1071.05 | 9.3466  | 1061.99 | 4.2714  |
| v37 | 1121.72 | 5.5584  | 1070.18 | 7.0064  |
| v38 | 1144.21 | 7.7648  | 1083.85 | 2.2621  |
| v39 | 1187.75 | 0.2076  | 1120.4  | 5.1455  |
| v40 | 1191.71 | 0.4128  | 1128.49 | 3.3661  |
| v41 | 1197.55 | 0.081   | 1190.35 | 0.0145  |
| v42 | 1218.18 | 5.2474  | 1204.75 | 0.1485  |
| v43 | 1227.36 | 4.6591  | 1220.37 | 0.9047  |
| v44 | 1284.58 | 16.0196 | 1229.65 | 0.4213  |
| v45 | 1310.63 | 15.0801 | 1299.42 | 0.3342  |
| v46 | 1329.54 | 10.2921 | 1320.83 | 0.2215  |
| v47 | 1371.35 | 6.4458  | 1333.44 | 0.1327  |
| v48 | 1380.4  | 14.959  | 1356.76 | 0.124   |



|     |         |         |         |         |
|-----|---------|---------|---------|---------|
| v49 | 1414.14 | 9.8262  | 1368.29 | 1.6352  |
| v50 | 1420.02 | 8.0673  | 1423.44 | 1.1678  |
| v51 | 1464.05 | 12.6387 | 1458.13 | 4.4507  |
| v52 | 1480.51 | 14.2923 | 1492.62 | 7.0332  |
| v53 | 1488.7  | 14.303  | 1495.84 | 7.6516  |
| v54 | 1498.01 | 7.2593  | 1509.92 | 6.0195  |
| v55 | 1507.66 | 35.3086 | 1528.34 | 38.5466 |
| v56 | 1541.75 | 17.647  | 1554.86 | 3.566   |
| v57 | 1641.12 | 4.5566  | 1626.21 | 9.5919  |
| v58 | 1665.86 | 6.2733  | 1653.69 | 7.0855  |
| v59 | 1692.89 | 15.5861 | 1668.78 | 30.5625 |
| v60 | 2124.56 | 35.9191 | 1680.89 | 4.5087  |
| v61 | 2998.96 | 21.2422 | 3048.28 | 27.5742 |
| v62 | 3045.88 | 40.0709 | 3112.08 | 14.3573 |
| v63 | 3111.33 | 17.0933 | 3136.26 | 13.5809 |
| v64 | 3113.17 | 8.7816  | 3186.16 | 11.8781 |
| v65 | 3141.76 | 10.2609 | 3186.69 | 2.5593  |
| v66 | 3175.44 | 6.7975  | 3188.25 | 4.6147  |
| v67 | 3187.38 | 3.3276  | 3192.77 | 0.5243  |
| v68 | 3195.42 | 8.7814  | 3200    | 11.7448 |
| v69 | 3198.86 | 26.7372 | 3201.99 | 1.395   |
| v70 | 3209.59 | 11.0453 | 3208.91 | 23.5772 |
| v71 | 3215.75 | 24.3776 | 3216.34 | 12.7259 |
| v72 | 3221.63 | 14.4011 | 3219.45 | 16.6583 |

|     | <b>tsi26i27</b> |        | <b>tsi27p12</b> |         |
|-----|-----------------|--------|-----------------|---------|
| v1  | -2330.1         | 53.5   | -540.1          | 57.9715 |
| v2  | 27.98           | 0.0141 | 46.3            | 0.1893  |
| v3  | 62.44           | 0.6571 | 70.19           | 0.1892  |
| v4  | 75.76           | 0.5137 | 96.99           | 0.2601  |
| v5  | 157.91          | 0.2699 | 168.52          | 0.3175  |
| v6  | 186.75          | 1.1286 | 204.09          | 0.4331  |
| v7  | 243.85          | 0.2315 | 239.74          | 0.6608  |
| v8  | 257.09          | 0.9171 | 269             | 11.7792 |
| v9  | 304.3           | 0.3151 | 295.36          | 0.6794  |
| v10 | 356.5           | 1.317  | 312.66          | 1.5831  |
| v11 | 416.65          | 0.0185 | 360.76          | 3.078   |
| v12 | 464.17          | 1.8873 | 394.64          | 11.2502 |
| v13 | 492.11          | 6.2567 | 411.02          | 1.6076  |

|     |         |         |         |         |
|-----|---------|---------|---------|---------|
| v14 | 525.37  | 2.3542  | 429.06  | 1.0606  |
| v15 | 552.13  | 2.8925  | 499.47  | 3.8244  |
| v16 | 637.08  | 1.921   | 578.05  | 1.1099  |
| v17 | 657.92  | 27.4756 | 603.05  | 9.2055  |
| v18 | 677.86  | 2.626   | 638.11  | 0.1696  |
| v19 | 715.97  | 33.4089 | 662.31  | 12.8831 |
| v20 | 719.8   | 35.5617 | 681.1   | 6.4413  |
| v21 | 770.17  | 15.7944 | 729.57  | 24.0504 |
| v22 | 776.39  | 5.1535  | 734.2   | 31.166  |
| v23 | 798.57  | 29.7323 | 771.07  | 27.3079 |
| v24 | 872.55  | 0.0939  | 797.41  | 20.1624 |
| v25 | 887.23  | 11.221  | 830.57  | 2.2481  |
| v26 | 900.62  | 38.2007 | 872.58  | 11.0438 |
| v27 | 919.06  | 0.6253  | 874.01  | 8.7776  |
| v28 | 952.82  | 3.9187  | 885.23  | 0.0961  |
| v29 | 973.46  | 3.5558  | 929.88  | 14.3444 |
| v30 | 1010.89 | 0.0658  | 963.34  | 0.4892  |
| v31 | 1023.29 | 0.3054  | 972.31  | 5.5301  |
| v32 | 1028.6  | 0.0337  | 997.32  | 2.1667  |
| v33 | 1039.56 | 8.6925  | 1020.4  | 0.5515  |
| v34 | 1046.7  | 6.9875  | 1028.88 | 1.2897  |
| v35 | 1062.69 | 2.3921  | 1037.2  | 0.799   |
| v36 | 1091.04 | 7.8534  | 1039.05 | 0.7337  |
| v37 | 1100.67 | 6.3314  | 1066.43 | 4.9729  |
| v38 | 1113.35 | 8.2755  | 1066.71 | 0.729   |
| v39 | 1127.04 | 4.0913  | 1112.22 | 2.0747  |
| v40 | 1147.64 | 10.3217 | 1118.35 | 6.3548  |
| v41 | 1173.99 | 1.8125  | 1142    | 30.4874 |
| v42 | 1187.9  | 0.036   | 1190.94 | 0.1878  |
| v43 | 1207.29 | 0.1239  | 1218.47 | 2.1437  |
| v44 | 1238.49 | 0.8983  | 1232.64 | 12.536  |
| v45 | 1275.49 | 0.9409  | 1255.94 | 1.2815  |
| v46 | 1297.69 | 2.1438  | 1301.25 | 1.7461  |
| v47 | 1312    | 0.6591  | 1332.6  | 0.0735  |
| v48 | 1346.03 | 1.4296  | 1368.15 | 0.9142  |
| v49 | 1359.05 | 0.2049  | 1384.29 | 11.2373 |
| v50 | 1379.01 | 4.9582  | 1413.6  | 2.3496  |
| v51 | 1420.24 | 3.0905  | 1429.62 | 2.3227  |
| v52 | 1487.69 | 3.8378  | 1490.06 | 14.2878 |

|     |         |         |         |         |
|-----|---------|---------|---------|---------|
| v53 | 1501.7  | 7.8681  | 1495.25 | 7.1394  |
| v54 | 1503.16 | 9.451   | 1498.46 | 28.4363 |
| v55 | 1530.75 | 16.4326 | 1544.26 | 3.4311  |
| v56 | 1603.26 | 1.9443  | 1553.91 | 46.8037 |
| v57 | 1636.87 | 2.5553  | 1636.98 | 6.7438  |
| v58 | 1661.05 | 8.6905  | 1651.31 | 2.8843  |
| v59 | 1698.41 | 1.7175  | 1680.22 | 2.5485  |
| v60 | 1841.48 | 15.5476 | 1729.68 | 80.8805 |
| v61 | 3015.91 | 22.4539 | 3057.84 | 22.3212 |
| v62 | 3053.97 | 23.173  | 3125.13 | 15.2168 |
| v63 | 3124.66 | 11.801  | 3143.49 | 12.5627 |
| v64 | 3127.54 | 27.4413 | 3149.17 | 9.6461  |
| v65 | 3135.18 | 18.7279 | 3187.02 | 2.5249  |
| v66 | 3189.32 | 2.5368  | 3190.68 | 0.451   |
| v67 | 3196.46 | 1.3546  | 3200.15 | 3.2353  |
| v68 | 3197.31 | 4.6018  | 3209.69 | 19.6712 |
| v69 | 3206.94 | 9.4231  | 3220.44 | 18.2416 |
| v70 | 3213.07 | 24.8916 | 3221.14 | 7.7298  |
| v71 | 3220.9  | 15.1738 | 3232.15 | 7.5458  |
| v72 | 3226.76 | 23.3597 | 3252.38 | 13.268  |

|     | <b>p3</b> |         | <b>p7</b> |         |
|-----|-----------|---------|-----------|---------|
| v1  | 37.39     | 0.2257  | 42.56     | 0.0407  |
| v2  | 60.21     | 0.0635  | 88.36     | 0.4085  |
| v3  | 91.58     | 0.7929  | 105.21    | 0.1428  |
| v4  | 114.13    | 0.2002  | 165.18    | 0.5607  |
| v5  | 217.7     | 1.5739  | 207.15    | 1.1619  |
| v6  | 257.7     | 0.0833  | 275.02    | 0.188   |
| v7  | 301.02    | 0.0513  | 299.84    | 0.3843  |
| v8  | 335.08    | 0.2044  | 335.27    | 0.7445  |
| v9  | 403.72    | 0.6782  | 416.58    | 0.6881  |
| v10 | 423.21    | 0.2265  | 423.31    | 0.4613  |
| v11 | 463.05    | 3.9653  | 473.17    | 4.9989  |
| v12 | 522.55    | 2.9298  | 532.78    | 4.1283  |
| v13 | 544.53    | 1.8968  | 566.93    | 1.4596  |
| v14 | 600.46    | 3.9823  | 583.2     | 3.3464  |
| v15 | 637       | 4.0267  | 637.54    | 2.5222  |
| v16 | 642.25    | 1.6055  | 641.91    | 2.4095  |
| v17 | 728.29    | 33.1406 | 730.62    | 42.4646 |

|     |         |         |         |         |
|-----|---------|---------|---------|---------|
| v18 | 732.9   | 18.3819 | 739.94  | 0.9482  |
| v19 | 735.69  | 2.1235  | 759.61  | 14.6616 |
| v20 | 786.99  | 57.9548 | 779.73  | 52.7505 |
| v21 | 826.18  | 10.7878 | 808.85  | 12.9324 |
| v22 | 878.21  | 0.4769  | 829.26  | 0.5722  |
| v23 | 885.51  | 2.6736  | 880.37  | 0.081   |
| v24 | 924.92  | 2.9162  | 904     | 0.1563  |
| v25 | 942.49  | 2.2264  | 957.93  | 2.2766  |
| v26 | 964.8   | 1.381   | 986.45  | 0.6144  |
| v27 | 1012.97 | 0.3319  | 1013.68 | 0.4733  |
| v28 | 1016.18 | 1.3254  | 1019.34 | 1.6708  |
| v29 | 1018.38 | 0.2118  | 1022.91 | 0.0218  |
| v30 | 1026.38 | 0.2496  | 1030    | 0.3595  |
| v31 | 1030.63 | 0.0409  | 1031.7  | 0.1147  |
| v32 | 1030.87 | 0.1141  | 1039.53 | 8.8598  |
| v33 | 1062.94 | 3.9211  | 1070.67 | 3.0465  |
| v34 | 1073.43 | 6.8305  | 1072.8  | 0.5677  |
| v35 | 1092.01 | 1.8019  | 1089.63 | 3.8711  |
| v36 | 1119.29 | 4.9684  | 1114.8  | 5.1735  |
| v37 | 1136.65 | 4.7213  | 1156.25 | 3.1257  |
| v38 | 1190.06 | 0.02    | 1189.05 | 0.0035  |
| v39 | 1206.07 | 0.1052  | 1193.69 | 0.2555  |
| v40 | 1219.86 | 0.4402  | 1215.22 | 0.3079  |
| v41 | 1229.33 | 0.1779  | 1235.13 | 0.1284  |
| v42 | 1304.92 | 0.4804  | 1305.23 | 1.4307  |
| v43 | 1326.71 | 0.2137  | 1309.82 | 0.4517  |
| v44 | 1336.5  | 0.2921  | 1327.64 | 0.2882  |
| v45 | 1357.71 | 0.0621  | 1335.93 | 0.4087  |
| v46 | 1368.87 | 1.0205  | 1363.19 | 0.3607  |
| v47 | 1423.4  | 1.1577  | 1427.42 | 1.7661  |
| v48 | 1462.54 | 3.2539  | 1482.67 | 2.4987  |
| v49 | 1494    | 6.9916  | 1494.32 | 7.2758  |
| v50 | 1497.26 | 8.3726  | 1498.69 | 9.5417  |
| v51 | 1513.23 | 10.462  | 1511.22 | 14.3581 |
| v52 | 1536.51 | 33.3138 | 1535.82 | 33.1095 |
| v53 | 1558.82 | 0.9197  | 1559.31 | 1.5296  |
| v54 | 1649.95 | 8.1224  | 1645.72 | 1.1316  |
| v55 | 1664.91 | 3.6403  | 1657.24 | 1.3195  |
| v56 | 1681.75 | 22.2187 | 1679.33 | 5.1819  |

|       |            |         |           |         |
|-------|------------|---------|-----------|---------|
| v57   | 1685.81    | 9.4946  | 1684.82   | 2.3958  |
| v58   | 3049.6     | 29.0925 | 3054.81   | 20.9284 |
| v59   | 3113.82    | 14.9877 | 3117.9    | 14.4256 |
| v60   | 3136.13    | 13.9563 | 3140.28   | 16.4687 |
| v61   | 3182.95    | 4.9622  | 3181.68   | 8.8127  |
| v62   | 3183.89    | 9.2616  | 3187.12   | 3.2328  |
| v63   | 3187.22    | 4.0389  | 3190.07   | 1.9484  |
| v64   | 3192.19    | 1.2168  | 3192.36   | 0.0727  |
| v65   | 3196.47    | 16.2646 | 3201.54   | 15.303  |
| v66   | 3202.07    | 5.1605  | 3202.49   | 14.6104 |
| v67   | 3208.84    | 23.7736 | 3209.17   | 26.0682 |
| v68   | 3212.69    | 19.8704 | 3216.87   | 23.0861 |
| v69   | 3219.4     | 15.3808 | 3219.29   | 12.7652 |
| <hr/> |            |         |           |         |
|       | <b>p12</b> |         | <b>p8</b> |         |
| v1    | 38.55      | 0.1339  | 15.56     | 0.0567  |
| v2    | 59.27      | 0.0294  | 33.04     | 0.2071  |
| v3    | 92.39      | 0.1284  | 75.43     | 1.4639  |
| v4    | 174.4      | 0.2688  | 106.21    | 1.1695  |
| v5    | 204.45     | 0.2323  | 109.79    | 0.3073  |
| v6    | 237.14     | 1.2161  | 174.29    | 1.2856  |
| v7    | 277.02     | 7.5348  | 208.87    | 2.8835  |
| v8    | 291.6      | 0.2648  | 208.88    | 0.0104  |
| v9    | 362.29     | 2.0448  | 263.96    | 4.6786  |
| v10   | 408.46     | 1.2792  | 352       | 1.9642  |
| v11   | 427.7      | 0.8265  | 392.39    | 0.0669  |
| v12   | 495.36     | 5.0811  | 410.49    | 1.9308  |
| v13   | 580.79     | 0.789   | 417.03    | 0       |
| v14   | 600.19     | 8.9464  | 480.79    | 6.2114  |
| v15   | 638.61     | 0.1437  | 529.37    | 2.2215  |
| v16   | 668.31     | 5.769   | 547.89    | 0.4987  |
| v17   | 675.37     | 12.3937 | 576.48    | 7.3325  |
| v18   | 727.92     | 32.4358 | 641.92    | 0.1542  |
| v19   | 732.3      | 25.4254 | 681.61    | 8.5748  |
| v20   | 770.38     | 27.0995 | 719.09    | 33.9622 |
| v21   | 797.9      | 18.428  | 764.21    | 0.2162  |
| v22   | 830.48     | 1.1157  | 773       | 13.5003 |
| v23   | 871.99     | 1.1583  | 791.39    | 43.2331 |
| v24   | 880.28     | 14.2103 | 864.62    | 12.3256 |

|     |         |         |         |         |
|-----|---------|---------|---------|---------|
| v25 | 881.24  | 0.1287  | 874.74  | 0.1801  |
| v26 | 925.79  | 13.5683 | 947.58  | 22.7064 |
| v27 | 960.78  | 0.2651  | 957.67  | 3.2096  |
| v28 | 966.39  | 5.5573  | 994.8   | 9.2714  |
| v29 | 991.39  | 1.82    | 996.07  | 13.7209 |
| v30 | 1015.83 | 0.2912  | 1012.34 | 0.0332  |
| v31 | 1028.88 | 1.6646  | 1027.52 | 0.0023  |
| v32 | 1033.95 | 0.1696  | 1031.79 | 0.2764  |
| v33 | 1039.27 | 0.4823  | 1033.82 | 22.5239 |
| v34 | 1066.04 | 4.2499  | 1064.85 | 5.0438  |
| v35 | 1071.21 | 1.9372  | 1076.38 | 0.5134  |
| v36 | 1109.77 | 3.3733  | 1105.04 | 0.4714  |
| v37 | 1116.44 | 5.2254  | 1114.47 | 5.4893  |
| v38 | 1140.63 | 25.7314 | 1165.7  | 0.2803  |
| v39 | 1190.8  | 0.1     | 1190.35 | 0.0472  |
| v40 | 1216.2  | 1.341   | 1212.71 | 0.0521  |
| v41 | 1235.67 | 13.0516 | 1252.86 | 3.5205  |
| v42 | 1255.21 | 0.308   | 1305.09 | 5.9079  |
| v43 | 1303.49 | 1.7586  | 1317.02 | 0.5022  |
| v44 | 1330.62 | 0.2657  | 1317.39 | 1.7638  |
| v45 | 1364.96 | 0.4787  | 1347.07 | 1.8253  |
| v46 | 1378.73 | 9.4131  | 1361.81 | 0.2977  |
| v47 | 1412.65 | 3.5091  | 1420.52 | 6.015   |
| v48 | 1430.94 | 1.8513  | 1449.56 | 5.9918  |
| v49 | 1485.77 | 14.1732 | 1484.13 | 7.1333  |
| v50 | 1494.96 | 2.1586  | 1492.67 | 5.4792  |
| v51 | 1501.04 | 24.6417 | 1496.77 | 20.7268 |
| v52 | 1546.23 | 7.5397  | 1546.63 | 34.0271 |
| v53 | 1600.32 | 65.829  | 1646.02 | 1.7884  |
| v54 | 1651.67 | 2.1449  | 1669.8  | 9.7166  |
| v55 | 1675.67 | 6.0827  | 1684.53 | 6.7382  |
| v56 | 1680.39 | 4.344   | 1747.56 | 36.8019 |
| v57 | 1733.12 | 54.1403 | 2344.01 | 2.0378  |
| v58 | 3053.32 | 25.5231 | 3039.41 | 33.0608 |
| v59 | 3115.6  | 13.2057 | 3095.63 | 15.4154 |
| v60 | 3130.23 | 24.4958 | 3128.01 | 4.2727  |
| v61 | 3146.64 | 9.8671  | 3150.45 | 27.5375 |
| v62 | 3188.44 | 2.6079  | 3165.61 | 2.9931  |
| v63 | 3194.78 | 0.2106  | 3173.43 | 6.3714  |

|       |           |         |                 |         |
|-------|-----------|---------|-----------------|---------|
| v64   | 3204.29   | 9.3994  | 3192.14         | 1.9729  |
| v65   | 3212.43   | 21.3702 | 3193.87         | 21.0873 |
| v66   | 3216.41   | 10.1404 | 3200.6          | 2.698   |
| v67   | 3221.45   | 13.636  | 3210.8          | 12.7749 |
| v68   | 3229.42   | 8.6186  | 3217.69         | 18.3474 |
| v69   | 3251.11   | 13.8436 | 3223.63         | 10.7543 |
| <hr/> |           |         |                 |         |
|       | <b>p9</b> |         | <b>vdW(i13)</b> |         |
| v1    | 14.36     | 0.0038  | 12.43           | 2.5856  |
| v2    | 40.79     | 0.277   | 26.19           | 3.5807  |
| v3    | 69.37     | 1.8469  | 40.7            | 0.3149  |
| v4    | 122.4     | 0.1139  | 62.21           | 1.011   |
| v5    | 126.98    | 0.5746  | 78.45           | 0.1486  |
| v6    | 162.4     | 0.3459  | 88.01           | 8.6967  |
| v7    | 211.9     | 1.954   | 130.77          | 13.0498 |
| v8    | 225.91    | 0.6236  | 147.67          | 4.0467  |
| v9    | 232.12    | 1.2998  | 148.23          | 4.357   |
| v10   | 310       | 1.2521  | 203.8           | 1.2985  |
| v11   | 385.41    | 0.0654  | 215.94          | 0.4929  |
| v12   | 416.98    | 0.0003  | 272.59          | 5.9016  |
| v13   | 428.69    | 0.939   | 277.06          | 52.275  |
| v14   | 479.77    | 10.3747 | 396.98          | 0.21    |
| v15   | 535.29    | 1.3907  | 461.73          | 0.3164  |
| v16   | 542.82    | 5.3808  | 480.57          | 4.4575  |
| v17   | 595.13    | 4.0908  | 490.01          | 1.507   |
| v18   | 628.45    | 3.8406  | 496.53          | 30.1731 |
| v19   | 648.23    | 1.4393  | 511.99          | 0.5452  |
| v20   | 700.99    | 4.4652  | 631.33          | 0.2222  |
| v21   | 703.94    | 5.8316  | 662.98          | 2.8933  |
| v22   | 719.21    | 35.4966 | 696.46          | 49.5314 |
| v23   | 792.02    | 40.8542 | 789.35          | 1.4868  |
| v24   | 874.65    | 0.0009  | 797.74          | 34.8678 |
| v25   | 894.73    | 0.2516  | 869.12          | 4.6072  |
| v26   | 916.17    | 0.1182  | 871.94          | 5.0328  |
| v27   | 958.87    | 1.9865  | 918.54          | 4.7731  |
| v28   | 963       | 51.2993 | 950.79          | 41.1027 |
| v29   | 971.35    | 0.9099  | 983.84          | 3.9618  |
| v30   | 1012.61   | 0.0063  | 999.53          | 6.5075  |
| v31   | 1027.53   | 0.0952  | 1004.84         | 20.3261 |

|     |         |         |         |         |
|-----|---------|---------|---------|---------|
| v32 | 1032.95 | 0.0238  | 1019.82 | 6.4842  |
| v33 | 1048.39 | 10.3052 | 1025.89 | 0.5398  |
| v34 | 1055.32 | 14.2453 | 1042.16 | 0.1715  |
| v35 | 1063.86 | 2.8609  | 1053.74 | 0.5464  |
| v36 | 1076.4  | 6.2039  | 1062.29 | 47.6016 |
| v37 | 1114.68 | 5.8937  | 1079.95 | 5.8494  |
| v38 | 1144.81 | 2.6836  | 1110.07 | 0.403   |
| v39 | 1190.91 | 0.0514  | 1117.85 | 3.6968  |
| v40 | 1212.36 | 0.1983  | 1188.52 | 66.4898 |
| v41 | 1235.26 | 1.5414  | 1191.5  | 12.1024 |
| v42 | 1289.15 | 0.6116  | 1217.81 | 1.1816  |
| v43 | 1317.65 | 0.2392  | 1232.79 | 22.4083 |
| v44 | 1333.09 | 2.4366  | 1309.16 | 0.7961  |
| v45 | 1361.92 | 0.441   | 1326.99 | 5.0887  |
| v46 | 1393.67 | 13.1336 | 1335.85 | 0.9182  |
| v47 | 1421.93 | 6.3587  | 1356.66 | 2.6683  |
| v48 | 1464.55 | 15.7725 | 1359.98 | 6.4989  |
| v49 | 1482.74 | 7.7683  | 1420.04 | 4.4582  |
| v50 | 1492.94 | 5.2769  | 1460.8  | 6.7292  |
| v51 | 1501.27 | 3.4556  | 1482.94 | 8.5521  |
| v52 | 1547.29 | 31.1367 | 1483.93 | 8.6385  |
| v53 | 1646.35 | 1.7451  | 1497.21 | 9.2106  |
| v54 | 1672.66 | 5.6962  | 1515.3  | 2.8987  |
| v55 | 1682.36 | 4.9438  | 1614.82 | 0.7685  |
| v56 | 1730.44 | 14.1901 | 1640.27 | 117.811 |
| v57 | 2343.91 | 2.0015  | 1698.86 | 6.7557  |
| v58 | 3049.05 | 24.9238 | 1761.2  | 16.3953 |
| v59 | 3112.55 | 12.1574 | 1987.32 | 35.2654 |
| v60 | 3142.13 | 16.4386 | 3038.29 | 30.6488 |
| v61 | 3153.63 | 6.7275  | 3094.87 | 21.468  |
| v62 | 3167.05 | 9.1427  | 3123.67 | 9.4503  |
| v63 | 3180.6  | 5.3814  | 3142.73 | 3.0146  |
| v64 | 3192.98 | 1.8383  | 3149.58 | 2.1874  |
| v65 | 3201.09 | 2.4862  | 3151.82 | 21.4454 |
| v66 | 3211.4  | 11.325  | 3160.83 | 4.783   |
| v67 | 3217.93 | 17.7602 | 3199.46 | 0.4139  |
| v68 | 3224.14 | 10.9252 | 3211.89 | 3.2505  |
| v69 | 3247.1  | 9.8565  | 3219.81 | 5.9724  |
| v70 |         |         | 3228.69 | 5.5287  |



|       |                 |         |                 |         |
|-------|-----------------|---------|-----------------|---------|
| v71   |                 |         | 3238.11         | 2.3165  |
| v72   |                 |         | 3243.91         | 8.1643  |
| <hr/> |                 |         |                 |         |
|       | <b>vdW(i17)</b> |         | <b>tsi13vdW</b> |         |
| v1    | 13.04           | 1.6084  | -7.89           | 1.2284  |
| v2    | 23.82           | 1.456   | 33.16           | 1.7893  |
| v3    | 56.16           | 0.2178  | 43.62           | 0.0853  |
| v4    | 73.62           | 2.358   | 73.37           | 0.9349  |
| v5    | 84.85           | 1.4261  | 75.04           | 0.1546  |
| v6    | 109.41          | 7.5627  | 102.37          | 3.7     |
| v7    | 138.95          | 0.9043  | 130.56          | 10.0243 |
| v8    | 150.02          | 5.099   | 149.2           | 4.0901  |
| v9    | 172.21          | 4.9928  | 159.34          | 7.0183  |
| v10   | 204.22          | 2.0294  | 202.66          | 0.9904  |
| v11   | 212.59          | 0.6722  | 214.64          | 0.7149  |
| v12   | 278.01          | 17.2734 | 273.41          | 29.4103 |
| v13   | 321.4           | 23.8924 | 287.73          | 14.7296 |
| v14   | 399.96          | 0.0182  | 392.25          | 0.0446  |
| v15   | 462.71          | 0.2888  | 462.47          | 0.2174  |
| v16   | 476.76          | 2.4611  | 478.44          | 2.5265  |
| v17   | 489.58          | 0.3663  | 489.67          | 0.0256  |
| v18   | 508.16          | 27.6783 | 496.93          | 28.2342 |
| v19   | 514.03          | 5.5217  | 512.28          | 0.5676  |
| v20   | 633.55          | 0.1859  | 631.41          | 0.1742  |
| v21   | 654.95          | 1.9846  | 661.03          | 3.3236  |
| v22   | 697.78          | 43.2119 | 692.34          | 52.996  |
| v23   | 786.85          | 1.6757  | 788.64          | 0.7844  |
| v24   | 797.25          | 19.1738 | 797.57          | 26.7275 |
| v25   | 863.68          | 13.236  | 863.89          | 6.2021  |
| v26   | 869.95          | 1.0064  | 867.26          | 4.8003  |
| v27   | 919.65          | 3.3926  | 918.49          | 4.7523  |
| v28   | 947.05          | 32.3899 | 957.17          | 41.7161 |
| v29   | 976.2           | 0.2907  | 978.11          | 1.1852  |
| v30   | 994.33          | 57.2266 | 999.95          | 5.8062  |
| v31   | 999.54          | 7.6622  | 1002.48         | 27.6964 |
| v32   | 1021.14         | 3.5643  | 1019.9          | 4.6331  |
| v33   | 1021.47         | 0.5795  | 1021.48         | 0.6891  |
| v34   | 1041.38         | 0.0256  | 1041.12         | 0.1925  |

|     |         |          |         |         |
|-----|---------|----------|---------|---------|
| v35 | 1055.29 | 5.7962   | 1054.26 | 0.5603  |
| v36 | 1056.72 | 44.6955  | 1068.8  | 44.6368 |
| v37 | 1079.11 | 7.25     | 1074.95 | 4.3136  |
| v38 | 1113.67 | 1.6333   | 1109.49 | 0.3171  |
| v39 | 1115.43 | 4.8384   | 1116.47 | 4.1399  |
| v40 | 1187.5  | 58.9813  | 1186.89 | 69.5648 |
| v41 | 1191.22 | 2.2891   | 1191.1  | 3.9575  |
| v42 | 1220.27 | 3.102    | 1216.88 | 0.4251  |
| v43 | 1228.59 | 17.0657  | 1230.82 | 20.3458 |
| v44 | 1308.23 | 0.7227   | 1307.66 | 0.9696  |
| v45 | 1325.22 | 4.7193   | 1326.64 | 4.0967  |
| v46 | 1330.9  | 9.7545   | 1334.61 | 0.9263  |
| v47 | 1349.19 | 3.395    | 1351.57 | 2.175   |
| v48 | 1358.17 | 5.9432   | 1359.22 | 6.4853  |
| v49 | 1420.4  | 5.8229   | 1418.71 | 4.8727  |
| v50 | 1459.85 | 9.7972   | 1460.57 | 8.8406  |
| v51 | 1483.54 | 5.6888   | 1483.06 | 8.241   |
| v52 | 1485.49 | 10.5011  | 1483.74 | 9.6447  |
| v53 | 1500.23 | 16.4927  | 1497.15 | 11.027  |
| v54 | 1517.49 | 0.8722   | 1515.28 | 2.2043  |
| v55 | 1621.14 | 0.7656   | 1615.97 | 0.7606  |
| v56 | 1643.92 | 82.3186  | 1640.67 | 89.721  |
| v57 | 1687.54 | 16.6701  | 1699.17 | 5.3422  |
| v58 | 1731.19 | 139.6986 | 1759.76 | 13.9651 |
| v59 | 2009.89 | 100.6702 | 2010.18 | 17.1269 |
| v60 | 3044.21 | 35.2781  | 3037.74 | 30.4605 |
| v61 | 3109.87 | 6.9214   | 3094.19 | 22.1545 |
| v62 | 3131.48 | 7.9154   | 3122.9  | 9.5411  |
| v63 | 3145.52 | 5.0421   | 3141.64 | 3.3283  |
| v64 | 3152.47 | 10.2299  | 3150.24 | 1.2456  |
| v65 | 3160.89 | 1.3763   | 3151.72 | 27.6445 |
| v66 | 3163.75 | 22.1218  | 3162.61 | 4.626   |
| v67 | 3198.05 | 0.1894   | 3198.58 | 0.2177  |
| v68 | 3209.73 | 3.7637   | 3210.8  | 3.5978  |
| v69 | 3217.44 | 7.2317   | 3218.92 | 6.2085  |
| v70 | 3227.52 | 5.3501   | 3228.59 | 3.8243  |
| v71 | 3230.86 | 6.3962   | 3234.32 | 3.4981  |

|                 |         |         |         |       |
|-----------------|---------|---------|---------|-------|
| v72             | 3246.35 | 8.0472  | 3248.61 | 5.325 |
| <hr/>           |         |         |         |       |
| <b>tsi17vdW</b> |         |         |         |       |
| <hr/>           |         |         |         |       |
| v1              | -5.74   | 2.2265  |         |       |
| v2              | 22.21   | 1.0377  |         |       |
| v3              | 43.91   | 0.1319  |         |       |
| v4              | 62.49   | 0.118   |         |       |
| v5              | 78.51   | 2.9491  |         |       |
| v6              | 85.33   | 0.7038  |         |       |
| v7              | 138.55  | 4.0525  |         |       |
| v8              | 146.91  | 4.4542  |         |       |
| v9              | 167.9   | 11.2328 |         |       |
| v10             | 203.43  | 1.1321  |         |       |
| v11             | 216.65  | 1.1777  |         |       |
| v12             | 271.6   | 11.3076 |         |       |
| v13             | 291.35  | 28.7278 |         |       |
| v14             | 396.88  | 0.0466  |         |       |
| v15             | 462.38  | 0.5469  |         |       |
| v16             | 477.18  | 2.4011  |         |       |
| v17             | 489.84  | 0.1158  |         |       |
| v18             | 501.83  | 26.3163 |         |       |
| v19             | 512.71  | 0.8436  |         |       |
| v20             | 633.05  | 0.1913  |         |       |
| v21             | 658.84  | 2.3393  |         |       |
| v22             | 696.6   | 46.9324 |         |       |
| v23             | 787.77  | 0.6532  |         |       |
| v24             | 796.65  | 19.939  |         |       |
| v25             | 861.38  | 4.4736  |         |       |
| v26             | 868.99  | 0.7431  |         |       |
| v27             | 918.19  | 5.0221  |         |       |
| v28             | 947.88  | 41.8593 |         |       |
| v29             | 976.92  | 0.4564  |         |       |
| v30             | 993.63  | 35.7107 |         |       |
| v31             | 998.08  | 8.4039  |         |       |
| v32             | 1020.66 | 2.3561  |         |       |
| v33             | 1021.24 | 1.9726  |         |       |
| v34             | 1041.62 | 0.0892  |         |       |
| v35             | 1054.76 | 36.7884 |         |       |

|     |         |         |
|-----|---------|---------|
| v36 | 1055.49 | 11.6195 |
| v37 | 1078.87 | 1.8637  |
| v38 | 1113.65 | 0.4284  |
| v39 | 1115.52 | 4.5584  |
| v40 | 1186.84 | 62.9071 |
| v41 | 1191.37 | 2.8215  |
| v42 | 1217.92 | 1.9028  |
| v43 | 1228.82 | 19.3042 |
| v44 | 1307.31 | 1.0801  |
| v45 | 1326.05 | 4.288   |
| v46 | 1332.36 | 4.6678  |
| v47 | 1350.37 | 3.3919  |
| v48 | 1358.38 | 6.3165  |
| v49 | 1423.38 | 5.2756  |
| v50 | 1458.99 | 9.4721  |
| v51 | 1481.6  | 9.0846  |
| v52 | 1484.88 | 10.4509 |
| v53 | 1495.53 | 21.3296 |
| v54 | 1516.64 | 0.9125  |
| v55 | 1619.82 | 0.9345  |
| v56 | 1643.28 | 77.1544 |
| v57 | 1693.17 | 3.3391  |
| v58 | 1744.08 | 77.2733 |
| v59 | 2019.81 | 52.1399 |
| v60 | 3043.23 | 30.1195 |
| v61 | 3107.52 | 7.4806  |
| v62 | 3130.89 | 1.4312  |
| v63 | 3146.82 | 19.1227 |
| v64 | 3148.26 | 0.3092  |
| v65 | 3155.01 | 19.0384 |
| v66 | 3160.66 | 10.0132 |
| v67 | 3198.01 | 0.2203  |
| v68 | 3210.07 | 3.6397  |
| v69 | 3217.45 | 6.5503  |
| v70 | 3227.65 | 4.6802  |
| v71 | 3231.02 | 5.7645  |
| v72 | 3246.22 | 7.7347  |

---

|     | <b>i34</b> |         | <b>i35</b> |         |
|-----|------------|---------|------------|---------|
| v1  | 11.61      | 0.0111  | 22.47      | 0.2808  |
| v2  | 34.39      | 0.354   | 50.51      | 0.2063  |
| v3  | 62.14      | 1.3595  | 71.16      | 0.6638  |
| v4  | 85.56      | 0.5563  | 83.54      | 0.4802  |
| v5  | 109.93     | 0.9323  | 125.77     | 0.5017  |
| v6  | 133.99     | 0.4997  | 190.47     | 0.6225  |
| v7  | 176.78     | 0.1696  | 196.04     | 0.9117  |
| v8  | 188.07     | 0.1314  | 208.43     | 0.6695  |
| v9  | 209.46     | 1.3906  | 250.85     | 3.0032  |
| v10 | 253.28     | 1.7733  | 329.18     | 2.2526  |
| v11 | 303.37     | 1.5346  | 377.89     | 4.7103  |
| v12 | 368.02     | 3.4403  | 412.08     | 1.2282  |
| v13 | 390.03     | 1.3304  | 418.38     | 1.1853  |
| v14 | 417.94     | 0.0028  | 465.15     | 2.1452  |
| v15 | 456.71     | 12.8775 | 482.87     | 5.3371  |
| v16 | 502.06     | 9.266   | 506.27     | 0.7558  |
| v17 | 532.09     | 24.8581 | 554.98     | 0.0781  |
| v18 | 547.39     | 7.0219  | 635.35     | 0.0056  |
| v19 | 585.53     | 13.611  | 673.82     | 0.5421  |
| v20 | 594.6      | 1.0221  | 696.7      | 32.852  |
| v21 | 644.91     | 0.0595  | 765.9      | 45.004  |
| v22 | 721.07     | 34.6715 | 807        | 14.5849 |
| v23 | 726.49     | 2.8813  | 829.67     | 8.787   |
| v24 | 792.61     | 39.534  | 844.84     | 0.3069  |
| v25 | 834.94     | 0.667   | 861.02     | 4.4401  |
| v26 | 877.31     | 0.0016  | 912.76     | 2.9643  |
| v27 | 901.27     | 0.5697  | 917.79     | 2.8937  |
| v28 | 941.92     | 11.6698 | 936.88     | 18.7328 |
| v29 | 960.34     | 3.6216  | 977.79     | 15.701  |
| v30 | 1008.37    | 43.1653 | 1000.31    | 0.0265  |
| v31 | 1014.15    | 0.0116  | 1001.64    | 9.2073  |
| v32 | 1027.99    | 0.1752  | 1004.22    | 46.749  |
| v33 | 1032.56    | 0.0741  | 1013.26    | 0.0035  |
| v34 | 1046.85    | 3.1874  | 1048.35    | 14.2981 |
| v35 | 1061.62    | 6.3613  | 1059.86    | 15.7146 |
| v36 | 1078.48    | 1.098   | 1067.7     | 0.997   |
| v37 | 1083.03    | 1.5068  | 1077.31    | 0.8926  |
| v38 | 1110.51    | 1.6562  | 1101.89    | 2.2746  |
| v39 | 1114.07    | 5.6505  | 1113.49    | 5.2768  |

|     |         |         |         |         |
|-----|---------|---------|---------|---------|
| v40 | 1136.55 | 0.0958  | 1129.2  | 37.266  |
| v41 | 1190.34 | 0.0314  | 1180.77 | 0.3408  |
| v42 | 1212.8  | 0.2097  | 1198.36 | 17.6757 |
| v43 | 1239.23 | 2.4409  | 1202.26 | 4.5536  |
| v44 | 1279.79 | 1.1885  | 1277.11 | 0.3848  |
| v45 | 1317.07 | 0.2737  | 1305.3  | 0.7166  |
| v46 | 1326.03 | 12.7855 | 1320.47 | 11.635  |
| v47 | 1342.91 | 5.4791  | 1345.55 | 2.4304  |
| v48 | 1362.06 | 0.3184  | 1355.79 | 0.0627  |
| v49 | 1365.5  | 13.6671 | 1398.36 | 1.349   |
| v50 | 1422.92 | 3.7536  | 1424.81 | 3.2277  |
| v51 | 1454.42 | 1.1216  | 1468.79 | 3.171   |
| v52 | 1486.08 | 7.3627  | 1476.7  | 1.6603  |
| v53 | 1492.98 | 5.1459  | 1485.31 | 7.0096  |
| v54 | 1497.8  | 11.4399 | 1500.21 | 8.8919  |
| v55 | 1547.23 | 26.8853 | 1512.68 | 40.9295 |
| v56 | 1647.96 | 1.7059  | 1597.1  | 3.6612  |
| v57 | 1680.1  | 10.9103 | 1620.93 | 13.5463 |
| v58 | 1756.15 | 2.0632  | 1764.24 | 0.7362  |
| v59 | 2375.56 | 2.3003  | 1981.23 | 31.1685 |
| v60 | 3025.24 | 10.9778 | 3039.22 | 41.0943 |
| v61 | 3041.39 | 34.4347 | 3096.18 | 18.0189 |
| v62 | 3099.35 | 16.5489 | 3123.89 | 9.7208  |
| v63 | 3126.7  | 5.566   | 3129.93 | 16.9024 |
| v64 | 3146.94 | 27.0368 | 3142.14 | 5.5814  |
| v65 | 3163.49 | 13.7654 | 3150.26 | 25.9174 |
| v66 | 3165.24 | 14.0808 | 3160.55 | 15.8433 |
| v67 | 3191.65 | 0.9065  | 3190.51 | 4.8173  |
| v68 | 3200.49 | 3.3681  | 3196.63 | 4.4914  |
| v69 | 3210.72 | 14.1822 | 3211.13 | 7.6428  |
| v70 | 3217.84 | 18.3514 | 3215.78 | 22.0768 |
| v71 | 3223.41 | 8.5465  | 3220.34 | 5.1099  |
| v72 | 3282.65 | 7.1282  | 3222.99 | 12.9529 |

---

**i36**

**i37**

---

|    |        |        |        |        |
|----|--------|--------|--------|--------|
| v1 | 6.73   | 0.0034 | 26.57  | 0.3674 |
| v2 | 39.84  | 0.6298 | 55.35  | 0.1489 |
| v3 | 48.43  | 0.748  | 63.48  | 0.5011 |
| v4 | 62.25  | 0.4831 | 88.24  | 0.418  |
| v5 | 84.59  | 0.0541 | 149.54 | 0.3069 |
| v6 | 105.48 | 1.0465 | 177.57 | 0.1417 |

|     |         |         |         |         |
|-----|---------|---------|---------|---------|
| v7  | 150.88  | 0.2838  | 197.6   | 0.4383  |
| v8  | 166.66  | 0.045   | 199.63  | 0.0874  |
| v9  | 250.22  | 2.4082  | 233.39  | 0.3153  |
| v10 | 283.12  | 1.0053  | 349.42  | 0.1961  |
| v11 | 322     | 0.6767  | 369.33  | 5.2907  |
| v12 | 401.2   | 2.5142  | 399.54  | 1.6842  |
| v13 | 417.66  | 0.0027  | 416.6   | 0.5482  |
| v14 | 418.76  | 11.9416 | 448.43  | 6.1986  |
| v15 | 426.59  | 1.8651  | 486.64  | 5.5898  |
| v16 | 469.17  | 17.3212 | 521.55  | 2.0369  |
| v17 | 549.38  | 3.1818  | 574.66  | 3.2816  |
| v18 | 575.7   | 2.9453  | 635.24  | 0.1174  |
| v19 | 583.94  | 4.6007  | 654.33  | 0.7632  |
| v20 | 644.27  | 0.1551  | 696.13  | 32.6818 |
| v21 | 690.49  | 25.9349 | 716.66  | 1.8689  |
| v22 | 720.79  | 34.7692 | 765.22  | 43.81   |
| v23 | 772.35  | 0.941   | 804.4   | 30.4514 |
| v24 | 792.39  | 39.3352 | 843.09  | 0.3397  |
| v25 | 876.48  | 0.0002  | 857.92  | 17.3927 |
| v26 | 881.67  | 1.4689  | 903.99  | 1.605   |
| v27 | 954.74  | 6.8368  | 912.02  | 3.1357  |
| v28 | 960.14  | 3.414   | 951.95  | 46.954  |
| v29 | 964.08  | 43.7151 | 997.45  | 0.6267  |
| v30 | 993.71  | 0.2585  | 999.18  | 0.1999  |
| v31 | 1013.44 | 0.0014  | 1005.92 | 13.5623 |
| v32 | 1027.48 | 0.074   | 1012.23 | 4.5217  |
| v33 | 1032.3  | 0.1078  | 1012.42 | 0.2781  |
| v34 | 1033.67 | 4.2827  | 1022.99 | 28.2595 |
| v35 | 1041.05 | 12.2462 | 1042.87 | 7.2446  |
| v36 | 1067.34 | 5.2662  | 1049.07 | 7.4519  |
| v37 | 1105.6  | 1.7229  | 1113.02 | 5.2872  |
| v38 | 1113.87 | 5.6025  | 1123.7  | 0.5721  |
| v39 | 1131.31 | 0.5216  | 1132.5  | 73.3407 |
| v40 | 1152.63 | 0.7155  | 1142.23 | 1.644   |
| v41 | 1190.03 | 0.0428  | 1179.94 | 0.3486  |
| v42 | 1212.75 | 0.2283  | 1199.83 | 4.301   |
| v43 | 1260.54 | 1.4035  | 1207.67 | 24.99   |
| v44 | 1277.45 | 6.3139  | 1289.83 | 1.2424  |
| v45 | 1313.96 | 23.123  | 1302.69 | 6.0173  |
| v46 | 1316.91 | 0.2467  | 1305.14 | 0.6968  |
| v47 | 1326.99 | 0.8208  | 1341.63 | 3.6281  |

|     |         |         |         |         |
|-----|---------|---------|---------|---------|
| v48 | 1361.74 | 0.3095  | 1354.95 | 0.0373  |
| v49 | 1391.03 | 9.0117  | 1410.89 | 13.5151 |
| v50 | 1422.66 | 3.143   | 1423.88 | 3.1518  |
| v51 | 1455.94 | 6.0607  | 1473.18 | 0.5975  |
| v52 | 1476.32 | 8.8313  | 1476.34 | 1.6587  |
| v53 | 1489.2  | 3.0878  | 1495.08 | 2.4599  |
| v54 | 1492.86 | 5.0756  | 1504.36 | 12.2141 |
| v55 | 1547.02 | 26.6091 | 1513.26 | 36.7866 |
| v56 | 1647.94 | 1.69    | 1596.86 | 3.7547  |
| v57 | 1680    | 10.8808 | 1620.75 | 13.8059 |
| v58 | 1722.51 | 14.2449 | 1728.19 | 36.5097 |
| v59 | 2375.43 | 2.2544  | 1978.41 | 35.5565 |
| v60 | 2993.28 | 25.2022 | 3048.93 | 39.6726 |
| v61 | 3017.64 | 13.9628 | 3122.09 | 15.1272 |
| v62 | 3042.24 | 22.183  | 3125.58 | 12.6131 |
| v63 | 3132.6  | 18.4489 | 3142.59 | 18.5208 |
| v64 | 3149.49 | 8.6451  | 3148.76 | 0.5738  |
| v65 | 3175.62 | 3.4572  | 3154.38 | 20.2261 |
| v66 | 3192.13 | 0.8449  | 3162.85 | 7.1144  |
| v67 | 3201.02 | 3.3357  | 3190.02 | 4.8285  |
| v68 | 3208.38 | 8.5235  | 3196.1  | 4.3211  |
| v69 | 3211.12 | 14.2275 | 3210.5  | 7.3083  |
| v70 | 3218.34 | 18.0643 | 3215.07 | 21.795  |
| v71 | 3223.86 | 8.5861  | 3222.4  | 13.171  |
| v72 | 3240.74 | 11.5871 | 3245.68 | 11.3314 |

---

**tsi13i35**

**tsi17i37**

---

|     |        |        |         |         |
|-----|--------|--------|---------|---------|
| v1  | -675.9 | 3.4076 | -659.07 | 11.6216 |
| v2  | 27.15  | 0.1457 | 34.62   | 0.3889  |
| v3  | 41.52  | 0.0249 | 43.27   | 0.0225  |
| v4  | 76.21  | 1.194  | 65.32   | 0.8523  |
| v5  | 94.29  | 1.3726 | 102.43  | 1.0016  |
| v6  | 127.65 | 0.4581 | 157.4   | 0.4235  |
| v7  | 183.25 | 2.1003 | 183.62  | 0.3089  |
| v8  | 198.44 | 1.1178 | 195.84  | 0.9295  |
| v9  | 213.85 | 0.1367 | 209.29  | 0.3188  |
| v10 | 266.8  | 2.2919 | 247.04  | 0.214   |
| v11 | 329.77 | 6.929  | 348.39  | 5.8947  |
| v12 | 396.68 | 5.7435 | 377.13  | 1.4377  |
| v13 | 416.13 | 0.0617 | 406.54  | 3.0667  |
| v14 | 428.27 | 2.2297 | 416.54  | 0.2623  |



|     |         |         |         |         |
|-----|---------|---------|---------|---------|
| v15 | 441.65  | 3.6848  | 462.26  | 7.0458  |
| v16 | 469.44  | 3.2437  | 505.58  | 2.7717  |
| v17 | 512.91  | 2.6282  | 519.45  | 6.2238  |
| v18 | 552.81  | 0.0356  | 567.29  | 4.0982  |
| v19 | 640.98  | 0.0048  | 639.35  | 0.1733  |
| v20 | 708.03  | 10.1846 | 678.15  | 9.7558  |
| v21 | 709.35  | 24.143  | 704.12  | 2.608   |
| v22 | 774.74  | 47.2071 | 708.97  | 31.3693 |
| v23 | 796.53  | 0.4384  | 775.49  | 46.5514 |
| v24 | 837.16  | 2.6092  | 850.87  | 0.0772  |
| v25 | 858.14  | 0.0717  | 859.83  | 0.0356  |
| v26 | 910.46  | 5.1693  | 890.38  | 3.7958  |
| v27 | 929.4   | 3.8969  | 909.1   | 40.9007 |
| v28 | 957.99  | 3.2731  | 917.5   | 1.8655  |
| v29 | 978.29  | 10.8827 | 931.5   | 3.5426  |
| v30 | 998.01  | 29.3662 | 1004.26 | 0.3187  |
| v31 | 1002.92 | 0.0165  | 1004.47 | 0.1899  |
| v32 | 1015.5  | 8.4838  | 1014.92 | 5.027   |
| v33 | 1019.04 | 0.0428  | 1020.52 | 0.0447  |
| v34 | 1045.99 | 6.6726  | 1023.53 | 13.7528 |
| v35 | 1059.23 | 3.0728  | 1053.36 | 3.7991  |
| v36 | 1066    | 0.2382  | 1063.51 | 7.8915  |
| v37 | 1095.34 | 2.5231  | 1104.16 | 0.6144  |
| v38 | 1114.29 | 5.6579  | 1114.02 | 5.7347  |
| v39 | 1154.87 | 12.189  | 1166.15 | 19.1854 |
| v40 | 1180.71 | 6.7133  | 1178.71 | 3.6597  |
| v41 | 1185.39 | 0.2077  | 1184.99 | 0.1395  |
| v42 | 1204.92 | 12.5486 | 1206.78 | 3.5585  |
| v43 | 1213.82 | 12.4763 | 1230.81 | 26.017  |
| v44 | 1298.52 | 1.0036  | 1294.49 | 7.3788  |
| v45 | 1310.94 | 0.5833  | 1310.61 | 1.2674  |
| v46 | 1322.6  | 30.2718 | 1314.25 | 15.2122 |
| v47 | 1336.39 | 2.8282  | 1335    | 7.4983  |
| v48 | 1359.16 | 0.0123  | 1359.22 | 0.0036  |
| v49 | 1411.14 | 10.6941 | 1410.37 | 16.7411 |
| v50 | 1428    | 1.0284  | 1422.42 | 5.1459  |
| v51 | 1475.31 | 2.5171  | 1476.25 | 3.2015  |
| v52 | 1483.58 | 6.3911  | 1485.81 | 2.9299  |
| v53 | 1485.98 | 2.7263  | 1498.73 | 4.736   |
| v54 | 1499.51 | 11.3903 | 1504.29 | 6.9504  |
| v55 | 1529.9  | 54.6026 | 1530.41 | 51.6823 |

|     |         |         |         |         |
|-----|---------|---------|---------|---------|
| v56 | 1620.05 | 3.2294  | 1620.43 | 3.1657  |
| v57 | 1644    | 44.3187 | 1637.08 | 60.8307 |
| v58 | 1679.45 | 1.5737  | 1653.77 | 14.3172 |
| v59 | 2066.2  | 0.3472  | 2058.4  | 0.7306  |
| v60 | 3033.61 | 50.4063 | 3055.13 | 34.1825 |
| v61 | 3087.2  | 18.1224 | 3107.4  | 4.6777  |
| v62 | 3103.21 | 26.6673 | 3134.85 | 22.4496 |
| v63 | 3121.47 | 12.0799 | 3138.92 | 21.2055 |
| v64 | 3138.76 | 11.9878 | 3149.89 | 13.217  |
| v65 | 3154.63 | 28.8371 | 3160.46 | 3.1191  |
| v66 | 3177.08 | 2.8742  | 3190.35 | 4.9984  |
| v67 | 3189.73 | 5.3175  | 3192.48 | 6.0635  |
| v68 | 3196.65 | 3.9341  | 3197.33 | 3.7175  |
| v69 | 3207.25 | 6.4016  | 3210.13 | 9.8041  |
| v70 | 3209.78 | 9.7501  | 3215.59 | 21.4169 |
| v71 | 3215.12 | 22.5953 | 3222.4  | 13.0801 |
| v72 | 3222.04 | 13.0778 | 3252.01 | 9.8202  |

---

**tsi34i35**

---

**tsi36i37**

|     |         |         |        |         |
|-----|---------|---------|--------|---------|
| v1  | -670.55 | 41.2168 | -654.7 | 26.9018 |
| v2  | 34.11   | 0.4164  | 37.93  | 0.0601  |
| v3  | 37.51   | 0.05    | 40.37  | 0.3627  |
| v4  | 61.3    | 0.7834  | 59.2   | 0.8102  |
| v5  | 82.56   | 0.531   | 79.06  | 0.2003  |
| v6  | 129.45  | 0.4174  | 117.86 | 0.4181  |
| v7  | 185.49  | 0.4482  | 138.28 | 0.582   |
| v8  | 203.88  | 0.7181  | 165.28 | 0.257   |
| v9  | 213.45  | 0.1332  | 215.46 | 0.5881  |
| v10 | 250.53  | 1.0864  | 236.27 | 0.364   |
| v11 | 324.88  | 2.6937  | 344.33 | 3.5381  |
| v12 | 353.48  | 2.0361  | 354.78 | 0.1957  |
| v13 | 411.37  | 0.6469  | 399.31 | 1.3019  |
| v14 | 416.94  | 0.0744  | 416.53 | 0.0163  |
| v15 | 462.62  | 0.7022  | 426.85 | 4.1393  |
| v16 | 495.28  | 4.8405  | 503.36 | 3.7173  |
| v17 | 519.84  | 5.9039  | 520.58 | 4.9736  |
| v18 | 538.68  | 0.9677  | 563.13 | 0.4874  |
| v19 | 628.93  | 1.6668  | 640.66 | 0.0783  |
| v20 | 643.86  | 0.6984  | 661.51 | 3.6121  |
| v21 | 659.89  | 16.7659 | 694.12 | 9.763   |
| v22 | 712.65  | 31.7081 | 712.67 | 31.4301 |

|     |         |         |         |         |
|-----|---------|---------|---------|---------|
| v23 | 729.02  | 2.8932  | 767.58  | 3.9237  |
| v24 | 778.6   | 45.3372 | 777.45  | 45.0915 |
| v25 | 836.44  | 0.425   | 862.26  | 0.0147  |
| v26 | 863.12  | 0.0029  | 893     | 12.6734 |
| v27 | 892.08  | 1.2136  | 934.6   | 2.7568  |
| v28 | 937.26  | 3.2257  | 944.83  | 10.7962 |
| v29 | 962.09  | 15.9266 | 971.51  | 39.1686 |
| v30 | 987.64  | 2.6399  | 1004.43 | 0.0212  |
| v31 | 1005.19 | 0.0278  | 1006.4  | 13.4116 |
| v32 | 1009.71 | 35.9939 | 1017.73 | 1.5879  |
| v33 | 1019.52 | 4.9235  | 1021.27 | 0.0425  |
| v34 | 1022.49 | 0.0915  | 1038.51 | 5.1245  |
| v35 | 1060.46 | 6.7059  | 1042.29 | 10.9887 |
| v36 | 1077.03 | 3.0984  | 1061.68 | 7.0761  |
| v37 | 1080.17 | 0.3713  | 1080.45 | 6.9184  |
| v38 | 1114.02 | 5.6871  | 1114.14 | 5.8285  |
| v39 | 1142.22 | 17.9187 | 1166.78 | 26.5193 |
| v40 | 1172.91 | 8.3079  | 1177.36 | 0.341   |
| v41 | 1186.23 | 0.0906  | 1186.41 | 0.1643  |
| v42 | 1207.55 | 0.9892  | 1204.59 | 0.9941  |
| v43 | 1216.38 | 8.2242  | 1209.76 | 3.3522  |
| v44 | 1273.22 | 0.5381  | 1282.12 | 2.945   |
| v45 | 1310.13 | 23.3451 | 1311.73 | 0.3321  |
| v46 | 1312.22 | 0.3528  | 1314.66 | 32.8903 |
| v47 | 1344.79 | 1.8458  | 1340.64 | 4.6246  |
| v48 | 1360.1  | 0.0075  | 1360.44 | 0.0025  |
| v49 | 1393.46 | 7.5008  | 1400.51 | 15.4941 |
| v50 | 1424.15 | 4.9827  | 1424.86 | 5.3696  |
| v51 | 1450.15 | 2.5557  | 1470.71 | 3.9075  |
| v52 | 1485.72 | 6.7275  | 1483.66 | 6.6478  |
| v53 | 1488.13 | 3.3404  | 1488.06 | 3.2195  |
| v54 | 1499.12 | 11.6413 | 1496.96 | 10.6779 |
| v55 | 1534.91 | 52.9546 | 1534.83 | 60.1756 |
| v56 | 1628.53 | 2.8508  | 1627.24 | 3.1556  |
| v57 | 1654.93 | 42.6337 | 1654.59 | 57.0162 |
| v58 | 1773.68 | 2.214   | 1739.1  | 15.1188 |
| v59 | 2109.11 | 9.1017  | 2115.39 | 21.4677 |
| v60 | 3042.48 | 35.0794 | 3010.78 | 57.7638 |
| v61 | 3101.05 | 16.0005 | 3084.28 | 10.9294 |
| v62 | 3109.72 | 9.4922  | 3098.24 | 9.5605  |
| v63 | 3127.56 | 6.8954  | 3122.77 | 15.8007 |

|     |         |         |         |         |
|-----|---------|---------|---------|---------|
| v64 | 3150.31 | 15.4092 | 3153.28 | 9.5325  |
| v65 | 3155.88 | 24.1749 | 3170.51 | 3.8886  |
| v66 | 3182.31 | 6.3883  | 3189.9  | 5.1755  |
| v67 | 3190.51 | 4.0864  | 3196.81 | 3.4881  |
| v68 | 3197.86 | 3.5888  | 3208.99 | 9.4417  |
| v69 | 3210.08 | 11.1183 | 3209.58 | 9.7308  |
| v70 | 3215.85 | 21.8884 | 3214.82 | 22.8389 |
| v71 | 3222.44 | 12.2829 | 3222.03 | 13.0734 |
| v72 | 3305.24 | 1.8111  | 3244.5  | 11.0003 |

---

**Table S8. (a)**  $k_3$  (**i1**→**p2**) analysis at zero collision energy.

|                                           | $k_7$ ( <b>c6</b> → <b>p1</b> ) $2.62 \times 10^8 \text{ s}^{-1}$ | $k_3$ ( <b>i1</b> → <b>p2</b> ) $2.78 \text{ s}^{-1}$ |
|-------------------------------------------|-------------------------------------------------------------------|-------------------------------------------------------|
| number of states ( <b>ts</b> )            | $8.63 \times 10^6$ ( <b>tsc6p1</b> )                              | $5.95 \times 10^{14}$ ( <b>tsi1p2</b> )               |
| density of states ( <b>intermediate</b> ) | $1.98 \times 10^9$ ( <b>c6</b> )                                  | $1.28 \times 10^{25}$ ( <b>i1</b> )                   |

$$\frac{k_7}{k_3} \propto \frac{\frac{\text{number of states (tsc6p1)}}{\text{density of states (c6)}}}{\frac{\text{number of states (tsi1p2)}}{\text{density of states (i1)}}} \approx 10^8$$

**(b) Number of states** (zero collision energy) and **frequencies** (cm<sup>-1</sup>)

| C <sub>2</sub> H + C <sub>2</sub> H <sub>4</sub><br>CCSD(T)/cc-pVQZ//<br>B3LYP/6-311G(d,p)                                             | C <sub>6</sub> H <sub>5</sub> CC+C <sub>4</sub> D <sub>6</sub><br>CCSD(T)/cc-pVTZ//<br>wB97XD/cc-pVTZ                 |
|----------------------------------------------------------------------------------------------------------------------------------------|-----------------------------------------------------------------------------------------------------------------------|
| 8.63 × 10 <sup>6</sup> ( <b>tsc6p1</b> )<br>( <i>k</i> <sub>7</sub> , <b>c6</b> → <b>p1</b> , 2.62 × 10 <sup>8</sup> s <sup>-1</sup> ) | 5.95 × 10 <sup>14</sup> ( <b>tsi1p2</b> )<br>( <i>k</i> <sub>3</sub> , <b>i1</b> → <b>p2</b> , 2.78 s <sup>-1</sup> ) |
| -741.1331                                                                                                                              | -571.5631                                                                                                             |
| 220.8862                                                                                                                               | 11.5708                                                                                                               |
| 281.2715                                                                                                                               | 41.0526                                                                                                               |
| 389.9083                                                                                                                               | 72.3213                                                                                                               |
| 418.1062                                                                                                                               | 113.6533                                                                                                              |
| 554.4333                                                                                                                               | 121.8362                                                                                                              |
| 649.4072                                                                                                                               | 180.1196                                                                                                              |
| 677.4378                                                                                                                               | 196.0092                                                                                                              |
| 686.2903                                                                                                                               | 257.2621                                                                                                              |
| 885.3291                                                                                                                               | 260.9275                                                                                                              |
| 914.5351                                                                                                                               | 349.2534                                                                                                              |
| 1012.5147                                                                                                                              | 359.7981                                                                                                              |
| 1106.1016                                                                                                                              | 416.3073                                                                                                              |
| 1296.6117                                                                                                                              | 423.7918                                                                                                              |
| 1433.0593                                                                                                                              | 440.0346                                                                                                              |
| 1591.4473                                                                                                                              | 536.2308                                                                                                              |
| 2210.7440                                                                                                                              | 547.4793                                                                                                              |
| 3144.0101                                                                                                                              | 582.3694                                                                                                              |
| 3150.2065                                                                                                                              | 641.2384                                                                                                              |
| 3245.0019                                                                                                                              | 658.5665                                                                                                              |
| 3477.1532                                                                                                                              | 665.7317                                                                                                              |
|                                                                                                                                        | 718.4427                                                                                                              |

|  |           |
|--|-----------|
|  | 738.2888  |
|  | 742.6543  |
|  | 758.6011  |
|  | 784.7155  |
|  | 791.4305  |
|  | 833.8025  |
|  | 874.1867  |
|  | 874.2977  |
|  | 937.5360  |
|  | 958.8121  |
|  | 969.7932  |
|  | 1012.4920 |
|  | 1027.5828 |
|  | 1032.7249 |
|  | 1058.5078 |
|  | 1064.1167 |
|  | 1096.9426 |
|  | 1114.7606 |
|  | 1190.8066 |
|  | 1212.1635 |
|  | 1237.6048 |
|  | 1317.7443 |
|  | 1331.6066 |
|  | 1361.8166 |
|  | 1492.7611 |
|  | 1531.6860 |
|  | 1558.4405 |
|  | 1602.3986 |
|  | 1646.4528 |

|  |           |
|--|-----------|
|  | 1678.9918 |
|  | 2300.1954 |
|  | 2336.6834 |
|  | 2344.9651 |
|  | 2358.8661 |
|  | 2367.7870 |
|  | 2421.9790 |
|  | 3193.4906 |
|  | 3202.1283 |
|  | 3211.7279 |
|  | 3218.9901 |
|  | 3224.7351 |



(c) Density of states (zero collision energy) and frequencies ( $\text{cm}^{-1}$ )

| $\text{C}_2\text{H} + \text{C}_2\text{H}_4$<br>CCSD(T)/cc-pVQZ//<br>B3LYP/6-311G(d,p)                                 | $\text{C}_6\text{H}_5\text{CC} + \text{C}_4\text{D}_6$<br>CCSD(T)/cc-pVTZ//<br>wB97XD/cc-pVTZ                |
|-----------------------------------------------------------------------------------------------------------------------|--------------------------------------------------------------------------------------------------------------|
| $1.98 \times 10^9$ ( <b>c6</b> )<br>( $k_7$ , <b>c6</b> $\rightarrow$ <b>p1</b> , $2.62 \times 10^8 \text{ s}^{-1}$ ) | $1.28 \times 10^{25}$ ( <b>i1</b> )<br>( $k_3$ , <b>i1</b> $\rightarrow$ <b>p2</b> , $2.78 \text{ s}^{-1}$ ) |
| 46.5231                                                                                                               | 6.3803                                                                                                       |
| 207.3390                                                                                                              | 40.4576                                                                                                      |
| 318.1048                                                                                                              | 64.0240                                                                                                      |
| 435.7973                                                                                                              | 98.3267                                                                                                      |
| 526.0302                                                                                                              | 123.9341                                                                                                     |
| 661.3982                                                                                                              | 175.6246                                                                                                     |
| 680.3857                                                                                                              | 240.1005                                                                                                     |
| 833.7489                                                                                                              | 273.9109                                                                                                     |
| 878.9712                                                                                                              | 319.2211                                                                                                     |
| 1045.8597                                                                                                             | 394.9053                                                                                                     |
| 1083.3448                                                                                                             | 405.6534                                                                                                     |
| 1197.4887                                                                                                             | 417.6833                                                                                                     |
| 1344.7288                                                                                                             | 428.1657                                                                                                     |
| 1446.8915                                                                                                             | 540.8525                                                                                                     |
| 1454.1079                                                                                                             | 556.5464                                                                                                     |
| 2227.1626                                                                                                             | 571.7122                                                                                                     |
| 2942.6291                                                                                                             | 631.5157                                                                                                     |
| 2974.1212                                                                                                             | 642.5586                                                                                                     |
| 3149.2941                                                                                                             | 651.5161                                                                                                     |
| 3264.7874                                                                                                             | 715.3767                                                                                                     |
| 3478.5307                                                                                                             | 720.8787                                                                                                     |
|                                                                                                                       | 741.1525                                                                                                     |

|  |           |
|--|-----------|
|  | 767.6370  |
|  | 792.6104  |
|  | 820.0357  |
|  | 820.6838  |
|  | 876.9872  |
|  | 902.4658  |
|  | 919.9334  |
|  | 944.0992  |
|  | 960.4850  |
|  | 1014.0652 |
|  | 1028.2489 |
|  | 1033.1884 |
|  | 1053.2266 |
|  | 1055.9708 |
|  | 1064.3948 |
|  | 1096.7098 |
|  | 1113.9785 |
|  | 1189.5745 |
|  | 1189.6936 |
|  | 1213.3177 |
|  | 1316.9073 |
|  | 1317.4419 |
|  | 1330.3433 |
|  | 1361.7930 |
|  | 1427.5877 |
|  | 1493.0670 |
|  | 1547.2282 |
|  | 1648.1094 |
|  | 1680.2507 |

|  |           |
|--|-----------|
|  | 2196.0135 |
|  | 2248.9203 |
|  | 2291.8300 |
|  | 2333.5270 |
|  | 2345.0158 |
|  | 2379.8825 |
|  | 2428.6948 |
|  | 3192.3052 |
|  | 3200.9303 |
|  | 3210.9662 |
|  | 3217.9940 |
|  | 3223.7378 |

**Table S9. (a)** Branching ratios at zero collision energy according to reaction paths in Figures S4, S5a, S5b, S6a, and S6b based on rate constants from Tables S2, S3, and S4, respectively.

| <b>C<sub>6</sub>H<sub>5</sub>CC + C<sub>4</sub>D<sub>6</sub></b> |           | <b>p1</b>              | <b>p2</b>              | <b>p10</b>             | <b>phenylacetylene</b> |
|------------------------------------------------------------------|-----------|------------------------|------------------------|------------------------|------------------------|
| <b>(Fig S4.)</b>                                                 | <b>i1</b> | 9.951×10 <sup>-1</sup> | 4.776×10 <sup>-3</sup> | 1.603×10 <sup>-4</sup> | -                      |

  

| <b>C<sub>6</sub>H<sub>5</sub>CC + isoprene</b> |           | <b>p3</b>              | <b>p4</b>              | <b>p11</b>             |
|------------------------------------------------|-----------|------------------------|------------------------|------------------------|
| <b>(Fig S5a.)</b>                              | <b>i5</b> | 9.991×10 <sup>-1</sup> | 2.994×10 <sup>-4</sup> | 3.209×10 <sup>-4</sup> |
|                                                |           | <b>p5</b>              | <b>p6</b>              | <b>p11'</b>            |
| <b>(Fig S5b.)</b>                              | <b>i9</b> | 9.838×10 <sup>-1</sup> | 1.467×10 <sup>-2</sup> | 1.511×10 <sup>-3</sup> |

  

| <b>C<sub>6</sub>H<sub>5</sub>CC + 1,3-pentadiene</b> |            | <b>p7</b>              | <b>p8</b>              | <b>p12</b>             |
|------------------------------------------------------|------------|------------------------|------------------------|------------------------|
| <b>(Fig S6a.)</b>                                    | <b>i13</b> | 9.701×10 <sup>-1</sup> | 2.958×10 <sup>-2</sup> | 3.296×10 <sup>-4</sup> |
|                                                      |            | <b>p3</b>              | <b>p9</b>              | <b>p12</b>             |
| <b>(Fig S6b.)</b>                                    | <b>i17</b> | 9.953×10 <sup>-1</sup> | 4.659×10 <sup>-3</sup> | 1.411×10 <sup>-6</sup> |

**(b)** The  $C_6H_5CC + C_4D_6$  reaction mechanism and rate equations according to reaction paths in Figure S4 based on rate constants from Table S2.

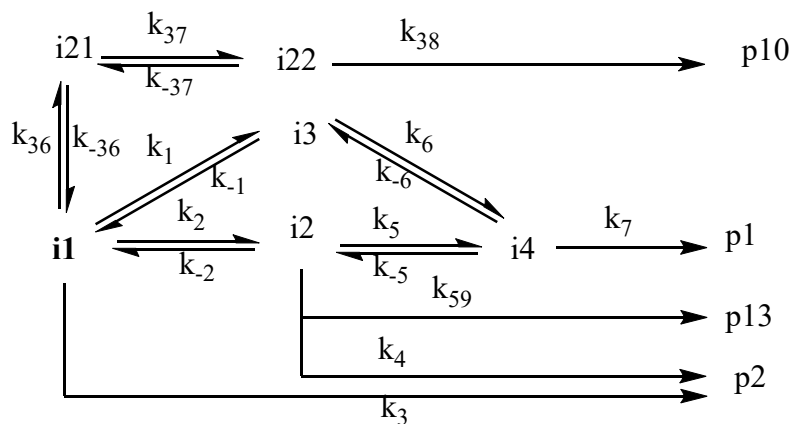

$$\frac{d[i1]}{dt} = k_{-2}[i2] + k_{-1}[i3] + k_{-36}[i21] - (k_1 + k_2 + k_3 + k_{36})[i1]$$

$$\frac{d[i2]}{dt} = k_2[i1] + k_{-5}[i4] - (k_{-2} + k_5 + k_4 + k_{59})[i2]$$

$$\frac{d[i3]}{dt} = k_1[i1] + k_{-6}[i4] - (k_{-1} + k_6)[i3]$$

$$\frac{d[i4]}{dt} = k_5[i2] + k_6[i3] - (k_{-5} + k_{-6} + k_7)[i4]$$

$$\frac{d[i21]}{dt} = k_{36}[i1] + k_{-37}[i22] - (k_{-36} + k_{37})[i21]$$

$$\frac{d[i22]}{dt} = k_{37}[i21] - (k_{-37} + k_{38})[i22]$$

$$\frac{d[p1]}{dt} = k_7[i4]$$

$$\frac{d[p2]}{dt} = k_3[i1] + k_4[i2]$$

$$\frac{d[p10]}{dt} = k_{38}[i22]$$

$$\frac{d[p13]}{dt} = k_{59}[i2]$$

(c). The C<sub>6</sub>H<sub>5</sub>CC + isoprene reaction mechanism and rate equations according to reaction paths in Figure S5 based on rate constants from Table S3.

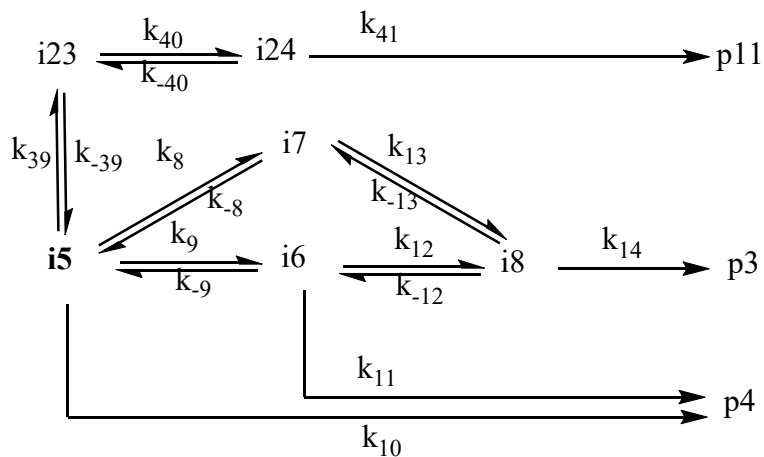

$$\frac{d[i5]}{dt} = k_{-8}[i7] + k_{-9}[i6] + k_{-39}[i23] - (k_8 + k_9 + k_{10} + k_{39})[i5]$$

$$\frac{d[i6]}{dt} = k_9[i5] + k_{-12}[i8] - (k_{-9} + k_{12} + k_{11})[i6]$$

$$\frac{d[i7]}{dt} = k_8[i5] + k_{-13}[i8] - (k_{-8} + k_{13})[i7]$$

$$\frac{d[i8]}{dt} = k_{12}[i6] + k_{13}[i7] - (k_{-12} + k_{-13} + k_{14})[i8]$$

$$\frac{d[i23]}{dt} = k_{39}[i5] + k_{-40}[i24] - (k_{-39} + k_{40})[i23]$$

$$\frac{d[i24]}{dt} = k_{40}[i23] - (k_{-40} + k_{41})[i24]$$

$$\frac{d[p3]}{dt} = k_{14}[i8]$$

$$\frac{d[p4]}{dt} = k_{10}[i5] + k_{11}[i6]$$

$$\frac{d[p11]}{dt} = k_{41}[i24]$$

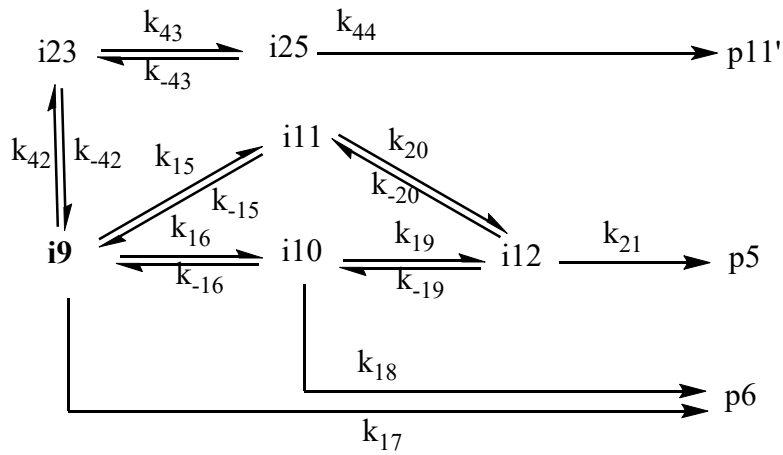

$$\frac{d[i9]}{dt} = k_{-15}[i11] + k_{-16}[i10] + k_{-42}[i23] - (k_{15} + k_{16} + k_{17} + k_{42})[i9]$$

$$\frac{d[i10]}{dt} = k_{16}[i9] + k_{-19}[i12] - (k_{-16} + k_{18} + k_{19})[i10]$$

$$\frac{d[i11]}{dt} = k_{15}[i9] + k_{-20}[i12] - (k_{-15} + k_{20})[i11]$$

$$\frac{d[i12]}{dt} = k_{19}[i10] + k_{20}[i11] - (k_{-19} + k_{-20} + k_{21})[i12]$$

$$\frac{d[i23]}{dt} = k_{42}[i9] + k_{-43}[i25] - (k_{-42} + k_{43})[i23]$$

$$\frac{d[i25]}{dt} = k_{43}[i23] - (k_{-43} + k_{44})[i25]$$

$$\frac{d[p5]}{dt} = k_{21}[i12]$$

$$\frac{d[p6]}{dt} = k_{17}[i9] + k_{18}[i10]$$

$$\frac{d[p11']}{dt} = k_{44}[i25]$$

(d). The C<sub>6</sub>H<sub>5</sub>CC + 1,3-pentadiene reaction mechanism and rate equations according to reaction paths in Figure S6 based on rate constants from Table S4.

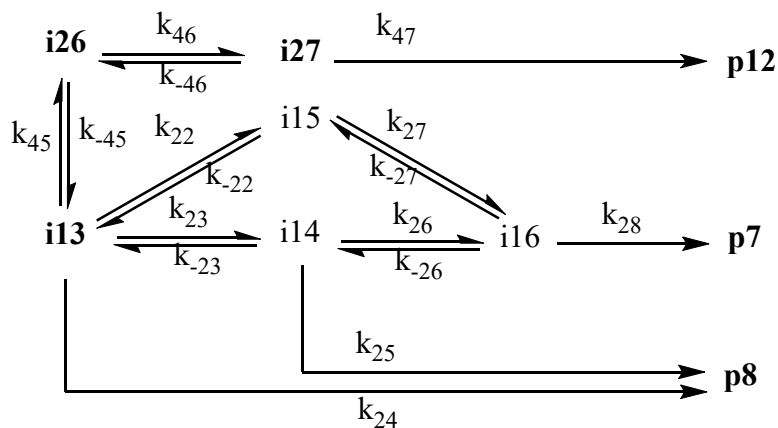

$$\frac{d[i13]}{dt} = k_{-22}[i15] + k_{-23}[i14] + k_{-45}[i26] - (k_{22} + k_{23} + k_{24} + k_{45})[i13]$$

$$\frac{d[i14]}{dt} = k_{23}[i13] + k_{-26}[i16] - (k_{-23} + k_{26} + k_{25})[i14]$$

$$\frac{d[i15]}{dt} = k_{22}[i13] + k_{-27}[i16] - (k_{-22} + k_{27})[i14]$$

$$\frac{d[i16]}{dt} = k_{26}[i14] + k_{27}[i15] - (k_{-26} + k_{-27} + k_{28})[i14]$$

$$\frac{d[i26]}{dt} = k_{45}[i13] + k_{-46}[i27] - (k_{-45} + k_{46})[i26]$$

$$\frac{d[i27]}{dt} = k_{46}[i26] - (k_{-46} + k_{47})[i27]$$

$$\frac{d[p7]}{dt} = k_{28}[i16]$$

$$\frac{d[p8]}{dt} = k_{24}[i13] + k_{25}[i14]$$

$$\frac{d[p12]}{dt} = k_{47}[i27]$$



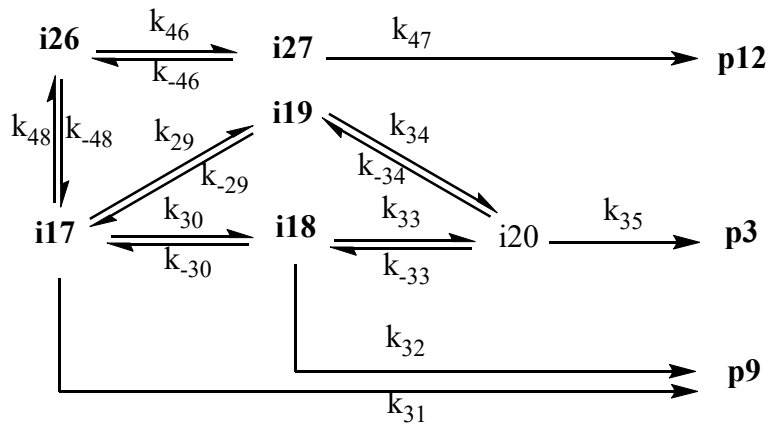

$$\frac{d[i17]}{dt} = k_{-29}[i19] + k_{-30}[i18] + k_{-48}[i26] - (k_{29} + k_{30} + k_{31} + k_{48})[i17]$$

$$\frac{d[i18]}{dt} = k_{30}[i17] + k_{-33}[i20] - (k_{-30} + k_{33} + k_{32})[i18]$$

$$\frac{d[i19]}{dt} = k_{29}[i17] + k_{-34}[i20] - (k_{-29} + k_{34})[i19]$$

$$\frac{d[i20]}{dt} = k_{33}[i18] + k_{34}[i19] - (k_{-33} + k_{-34} + k_{35})[i20]$$

$$\frac{d[i26]}{dt} = k_{48}[i17] + k_{-46}[i27] - (k_{-48} + k_{46})[i26]$$

$$\frac{d[i27]}{dt} = k_{46}[i26] - (k_{-46} + k_{47})[i27]$$

$$\frac{d[p3]}{dt} = k_{35}[i20]$$

$$\frac{d[p9]}{dt} = k_{31}[i17] + k_{32}[i18]$$

$$\frac{d[p12]}{dt} = k_{47}[i27]$$

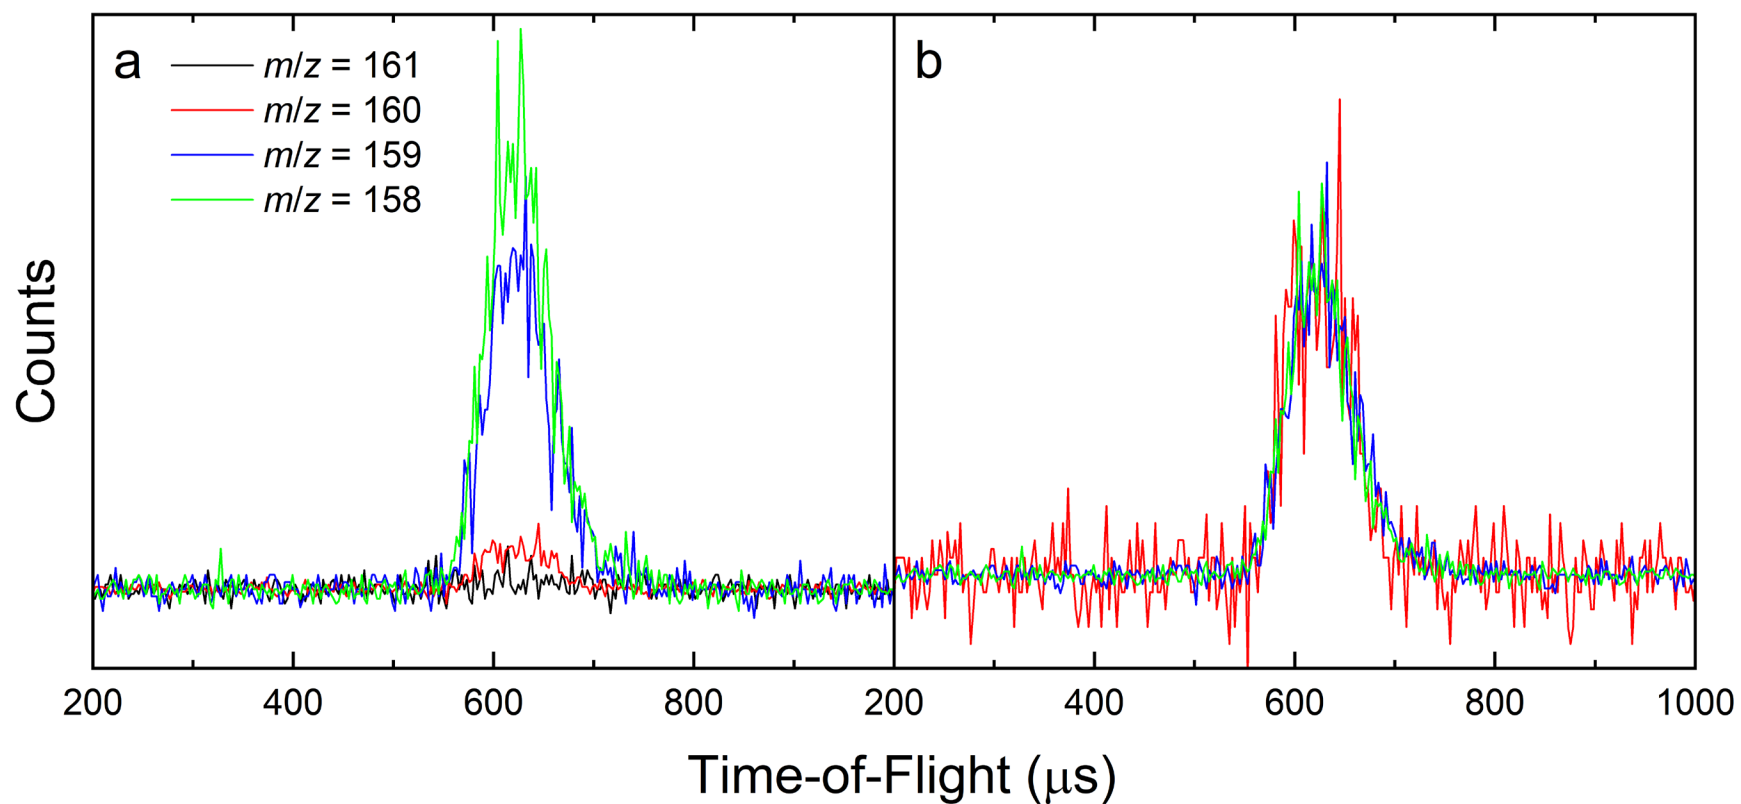

**Fig. S1** Absolute (a) and normalized (b) time-of-flight (TOF) mass spectra for the reaction of phenylethynyl radicals ( $\text{C}_6\text{H}_5\text{CC}$ ) with 1,3-butadiene- $d_6$  ( $\text{C}_4\text{D}_6$ ) at  $m/z = 158$ –161.

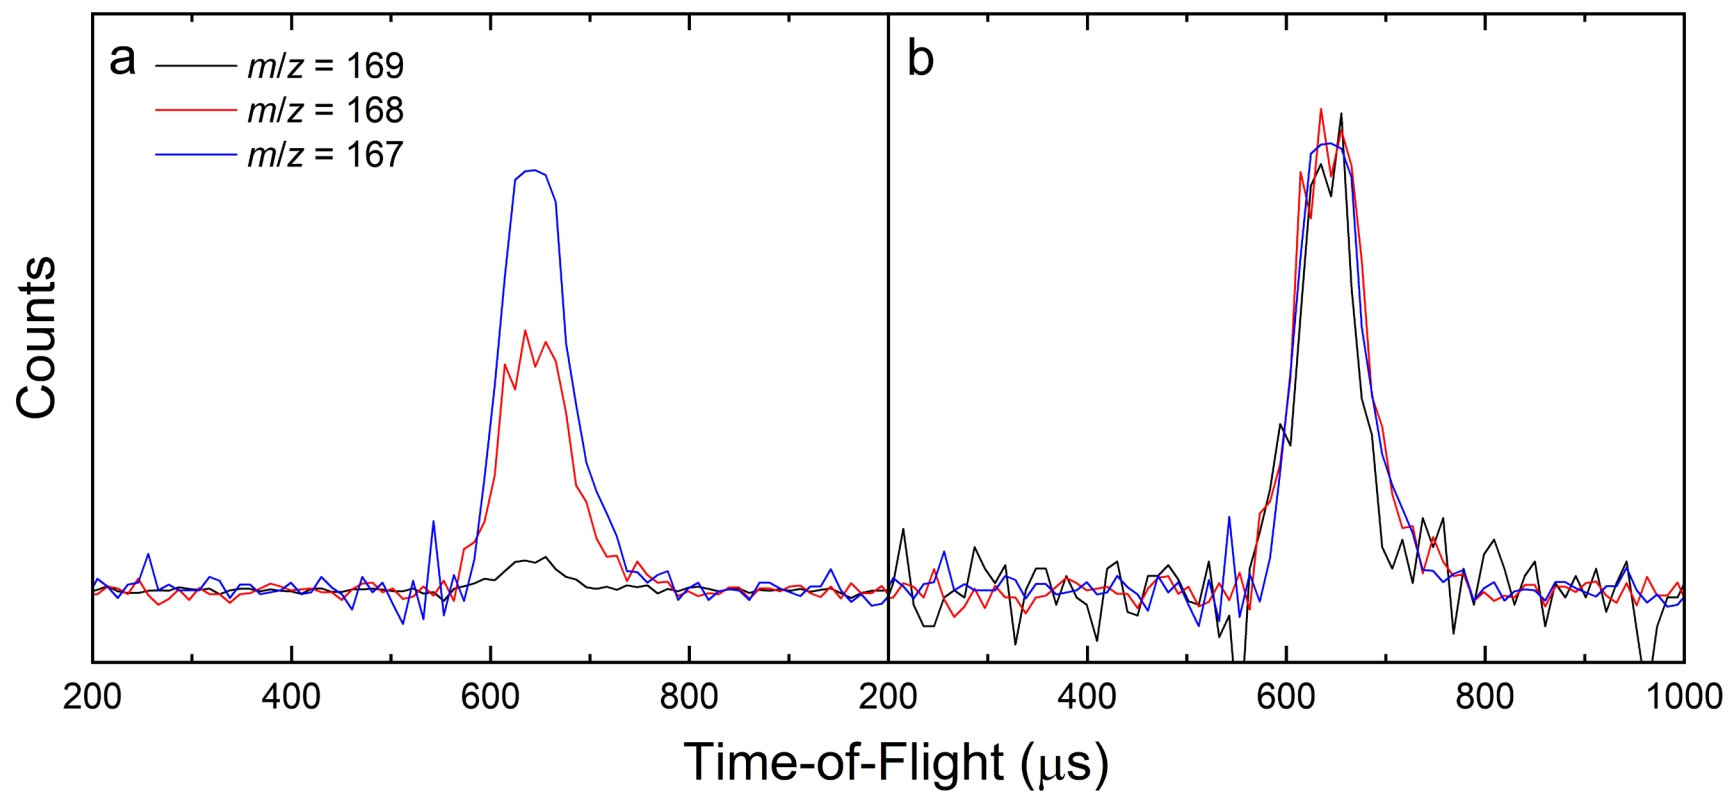

**Fig. S2** Absolute (a) and normalized (b) time-of-flight (TOF) mass spectra for the reaction of phenylethynyl radicals ( $\text{C}_6\text{H}_5\text{CC}$ ) with isoprene ( $\text{CH}_2\text{C}(\text{CH}_3)\text{CHCH}_2$ ) at  $m/z = 167$ – $169$ .

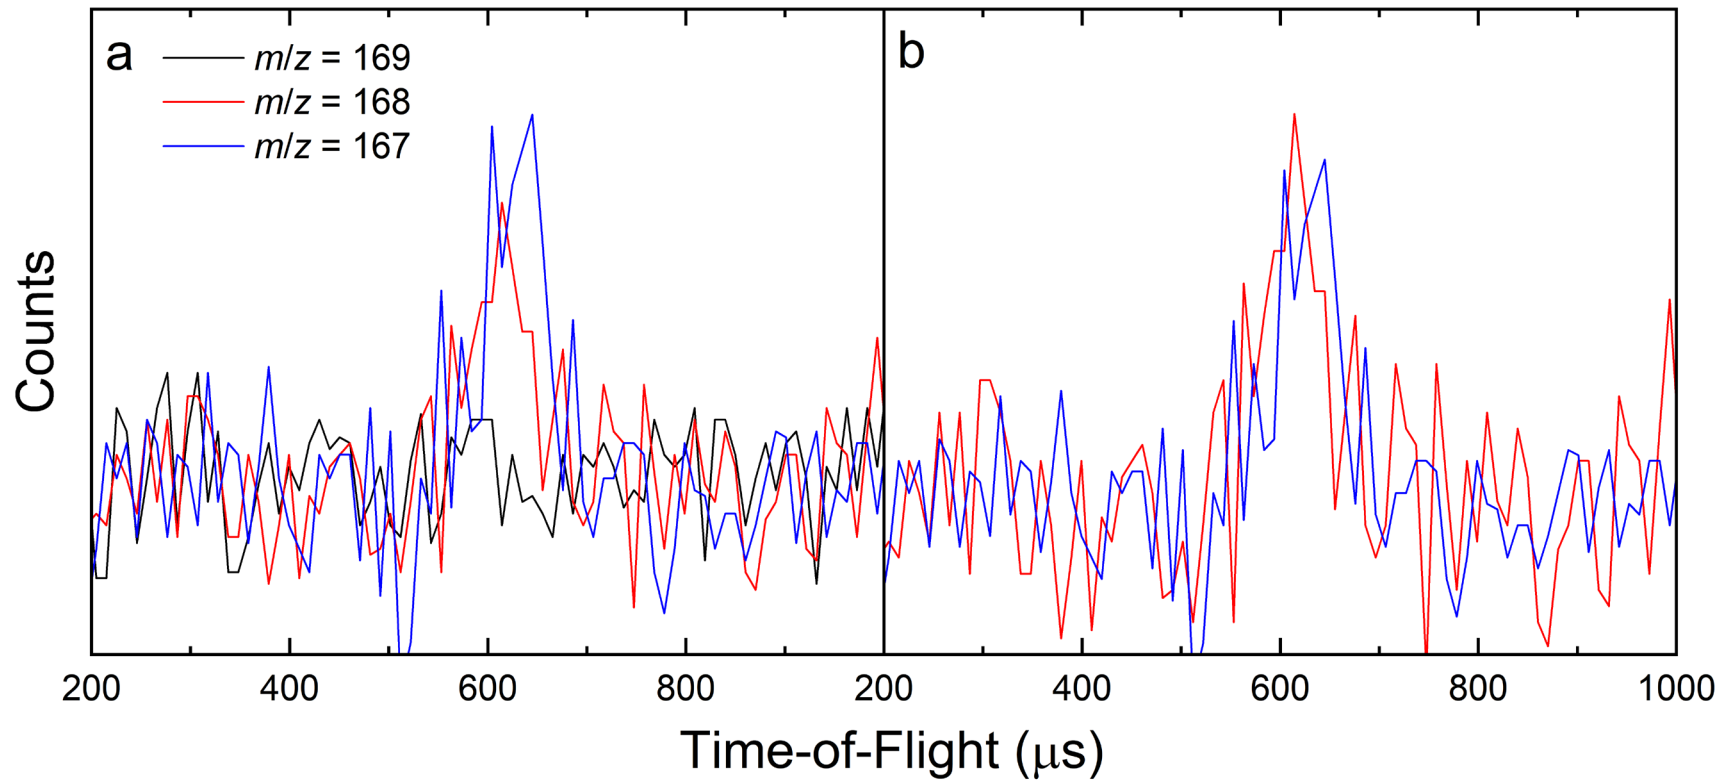

**Fig. S3** Absolute (a) and normalized (b) time-of-flight (TOF) mass spectra for the reaction of phenylethynyl radicals ( $\text{C}_6\text{H}_5\text{CC}$ ) with 1,3-pentadiene ( $\text{CH}_2\text{CHCHCHCH}_3$ ) at  $m/z = 167\text{--}169$ .

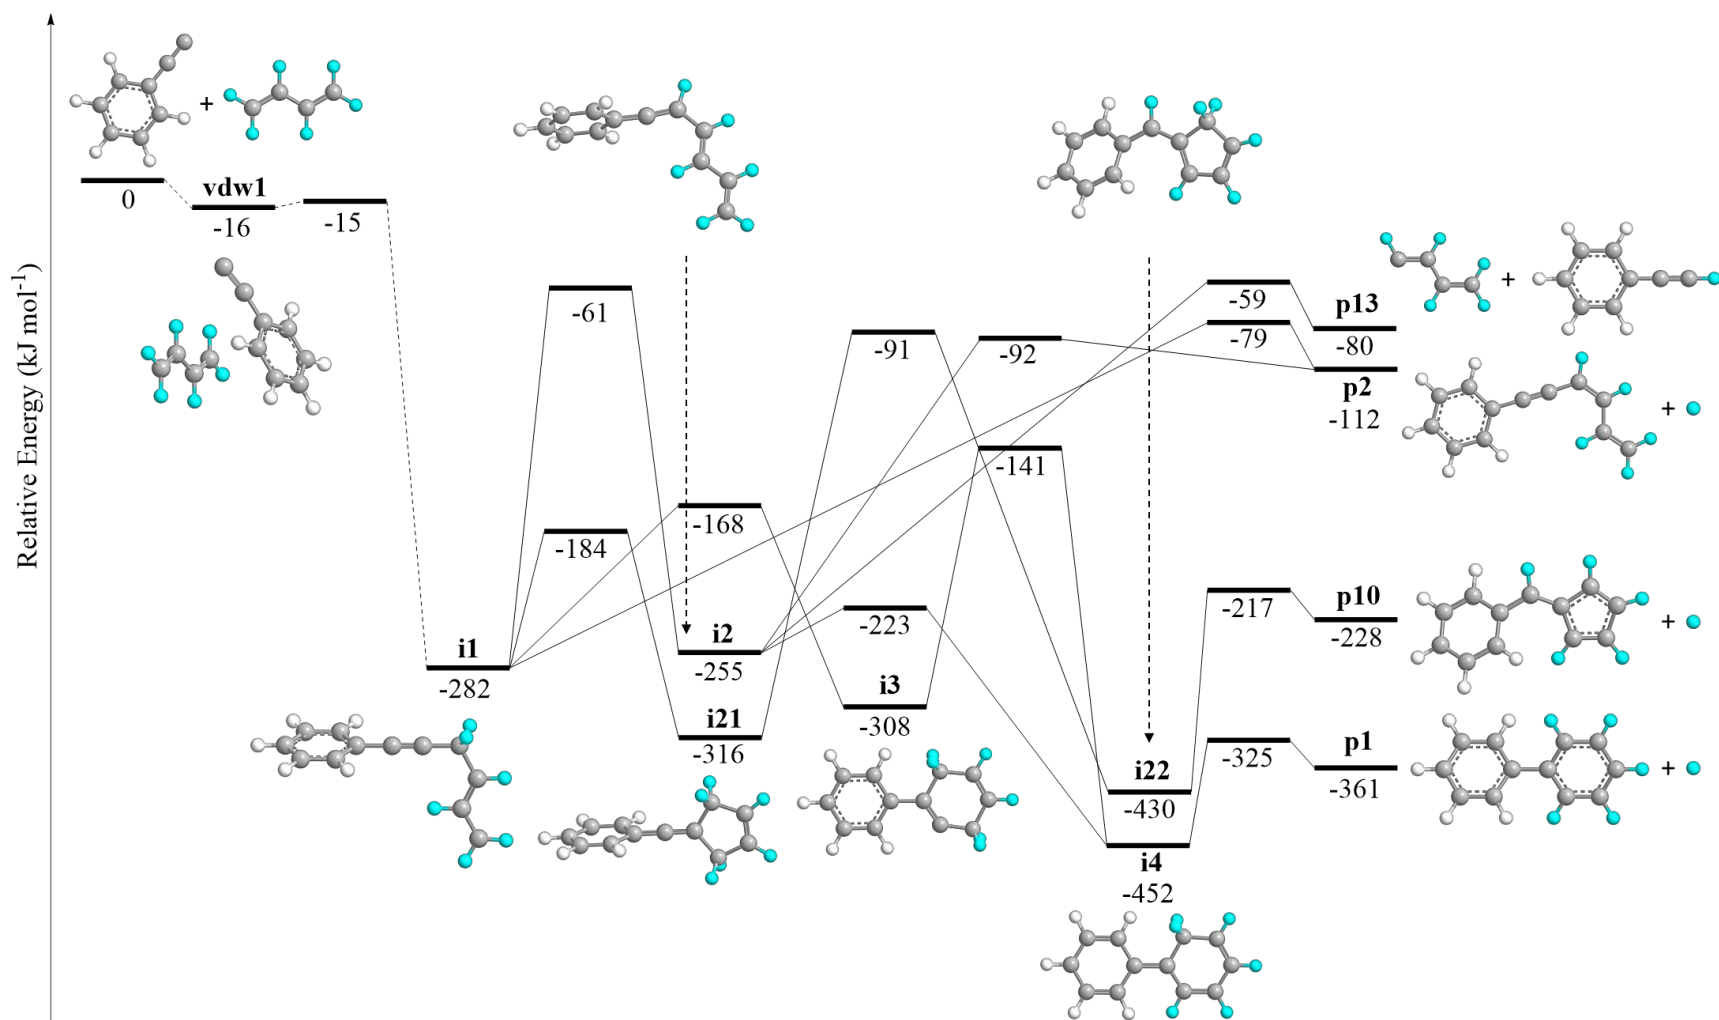

**Fig. S4** Schematic potential energy surface for the reaction of phenylethynyl (C<sub>6</sub>H<sub>5</sub>CC) with 1,3-butadiene-*d*<sub>6</sub> (C<sub>4</sub>D<sub>6</sub>) calculated at the CCSD(T)/cc-pVTZ//wB97X-D/cc-pVTZ level. Carbon atoms are colored gray, hydrogens are white, and deuteriums are light blue.

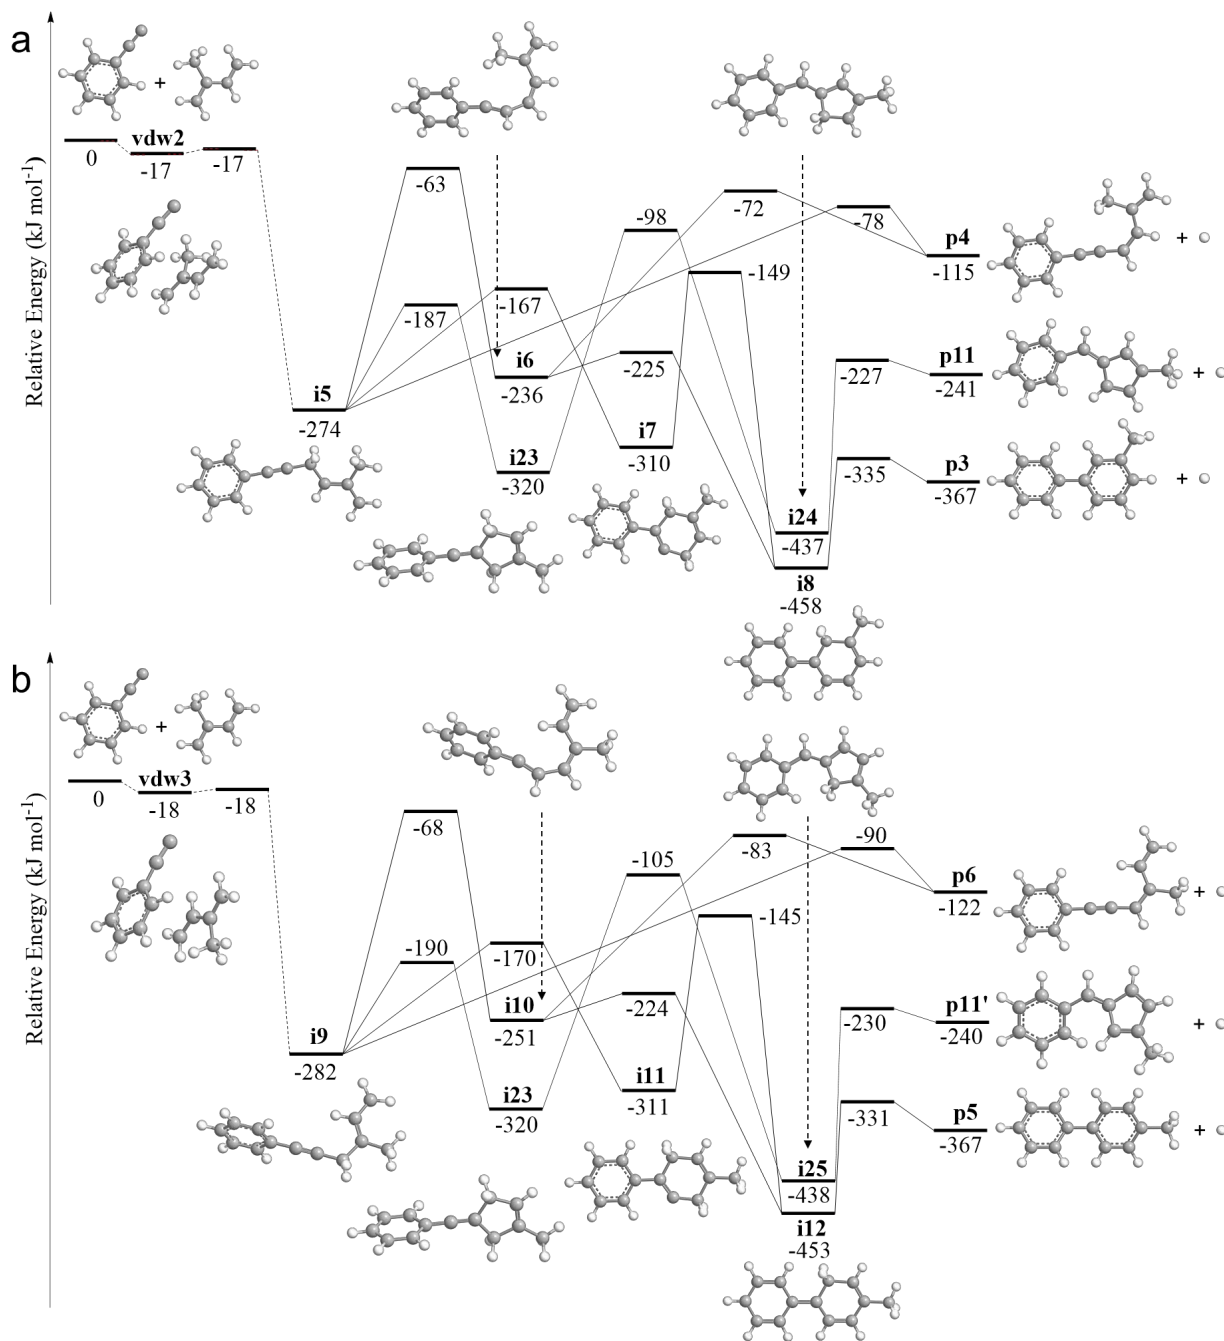

**Fig. S5** Schematic potential energy surface for the reaction of phenylethynyl ( $C_6H_5CC$ ) with isoprene ( $CH_2C(CH_3)CHCH_2$ ) calculated at the CCSD(T)/cc-pVTZ//wB97X-D/cc-pVTZ level for phenylethynyl addition to the C4 (**a**) and C1 (**b**) carbons of isoprene. Carbons are colored as gray and hydrogens are white.

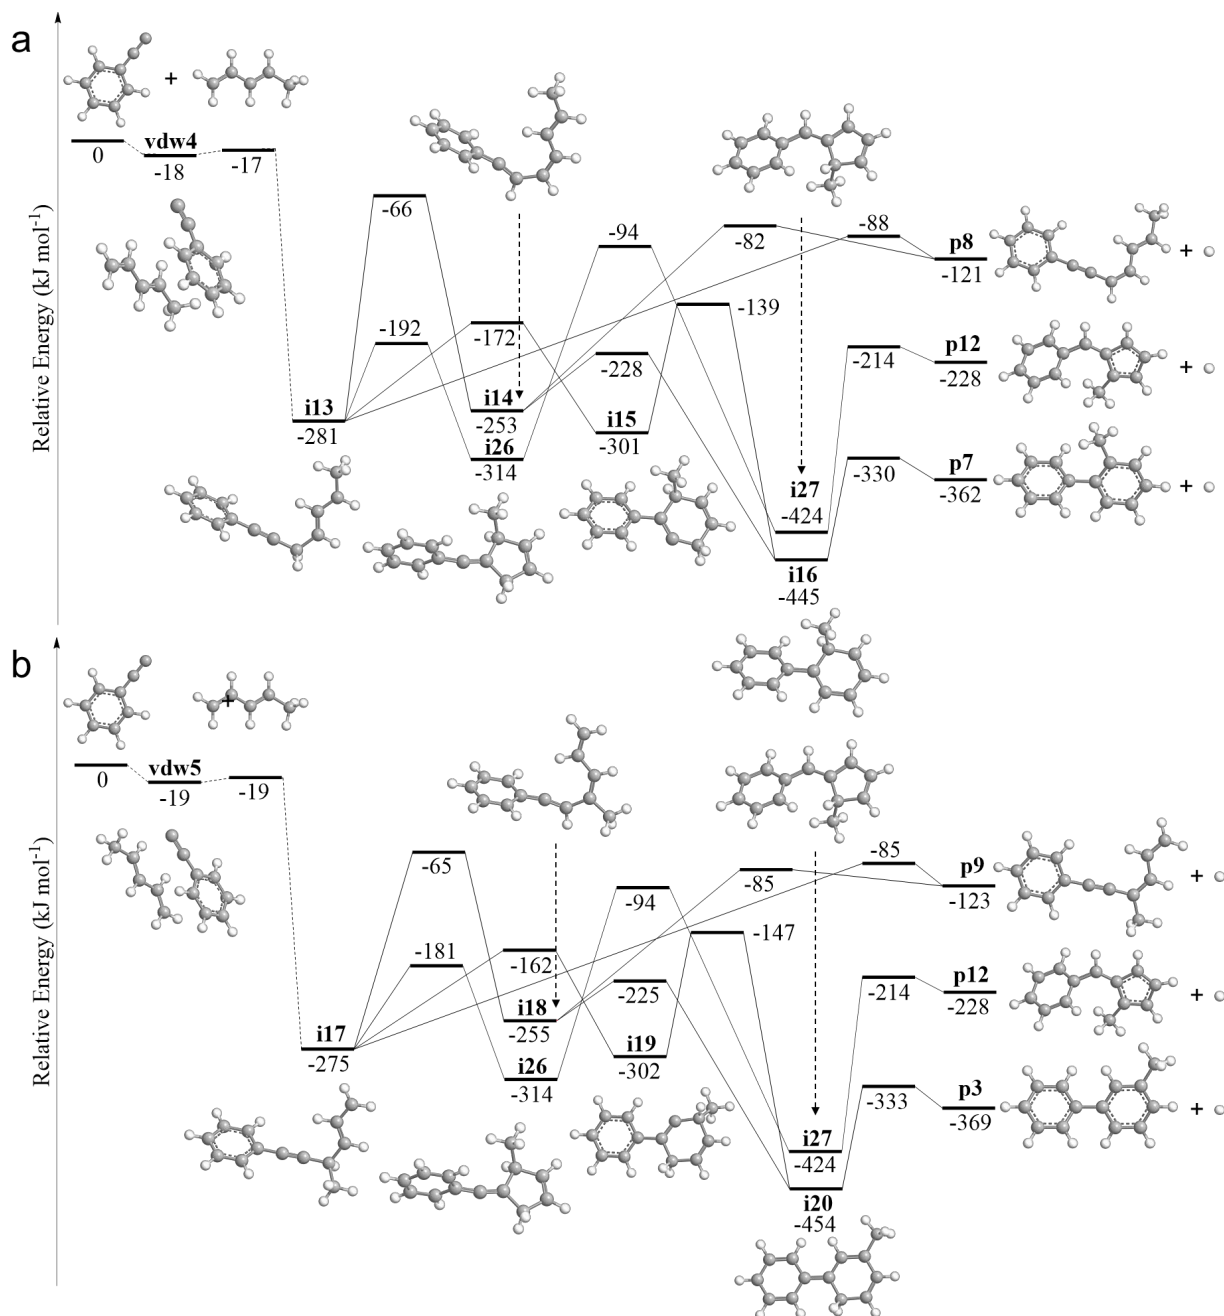

**Fig. S6** Schematic potential energy surface for the reaction of phenylethynyl ( $C_6H_5CC$ ) with 1,3-pentadiene ( $CH_2CHCHCH_3$ ) calculated at the CCSD(T)/cc-pVTZ//wB97X-D/cc-pVTZ level for phenylethynyl addition to the C1 (**a**) and C4 (**b**) carbons of 1,3-pentadiene. Carbons are colored as gray and hydrogens are white.

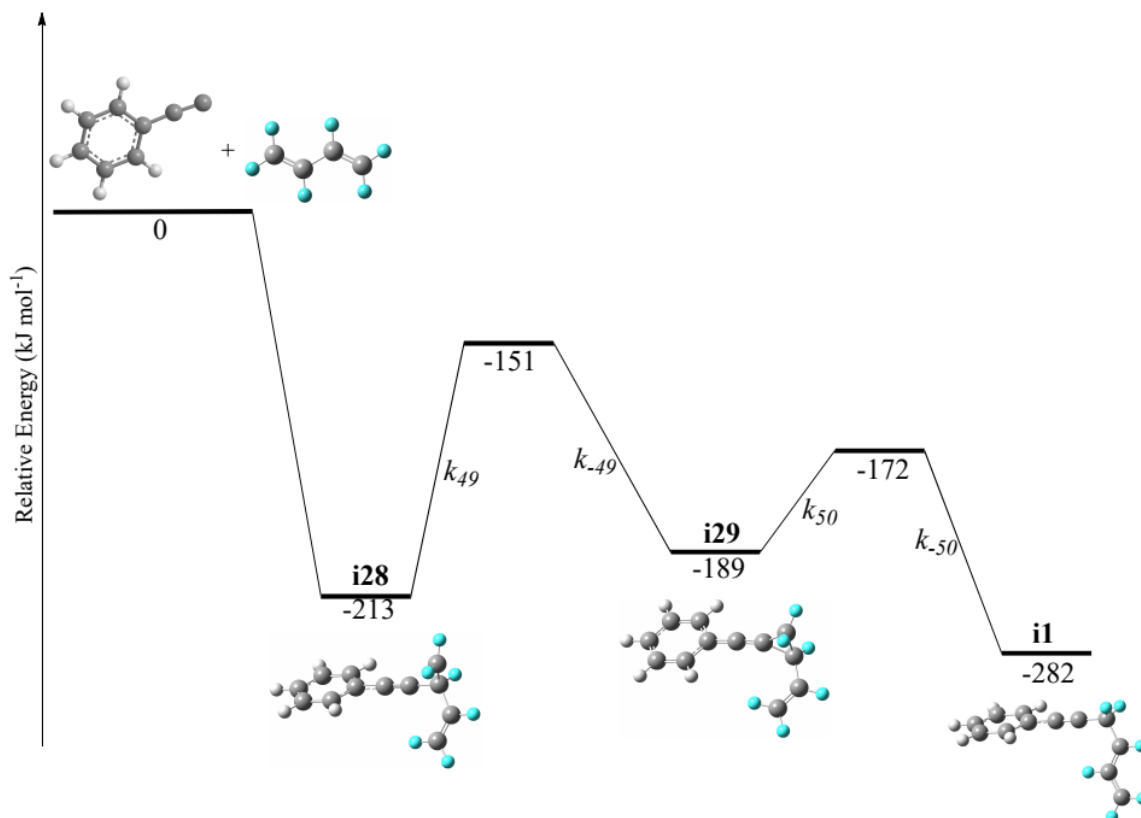

**Fig S7** Schematic potential energy surface for the reaction of phenylethynyl (C<sub>6</sub>H<sub>5</sub>CC) with 1,3-butadiene-*d*<sub>6</sub> (C<sub>4</sub>D<sub>6</sub>) calculated at the CCSD(T)/cc-pVTZ//wB97X-D/cc-pVTZ level for phenylethynyl addition to the C2 carbons of 1,3-butadiene-*d*<sub>6</sub>. Carbon atoms are colored gray, hydrogens are white, and deuteriums are light blue.



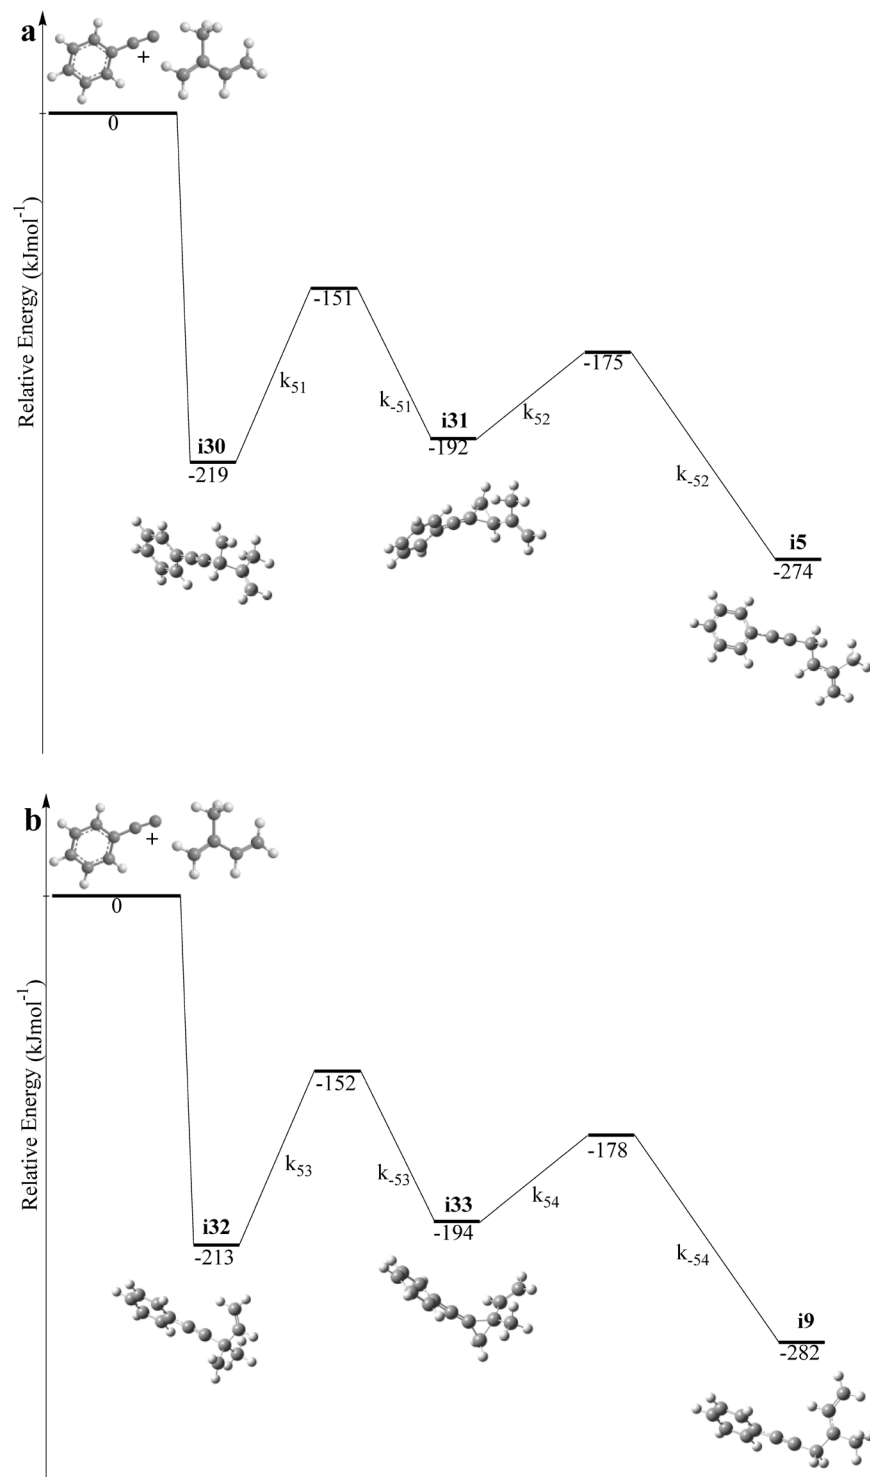

**Fig. S8** Schematic potential energy surface for the reaction of phenylethynyl ( $C_6H_5CC$ ) with isoprene ( $CH_2C(CH_3)CHCH_2$ ) calculated at the CCSD(T)/cc-pVTZ//wB97X-D/cc-pVTZ level for phenylethynyl addition to the C2 (a) and C3 (b) carbons of isoprene. Carbons are colored as gray and hydrogens are white.

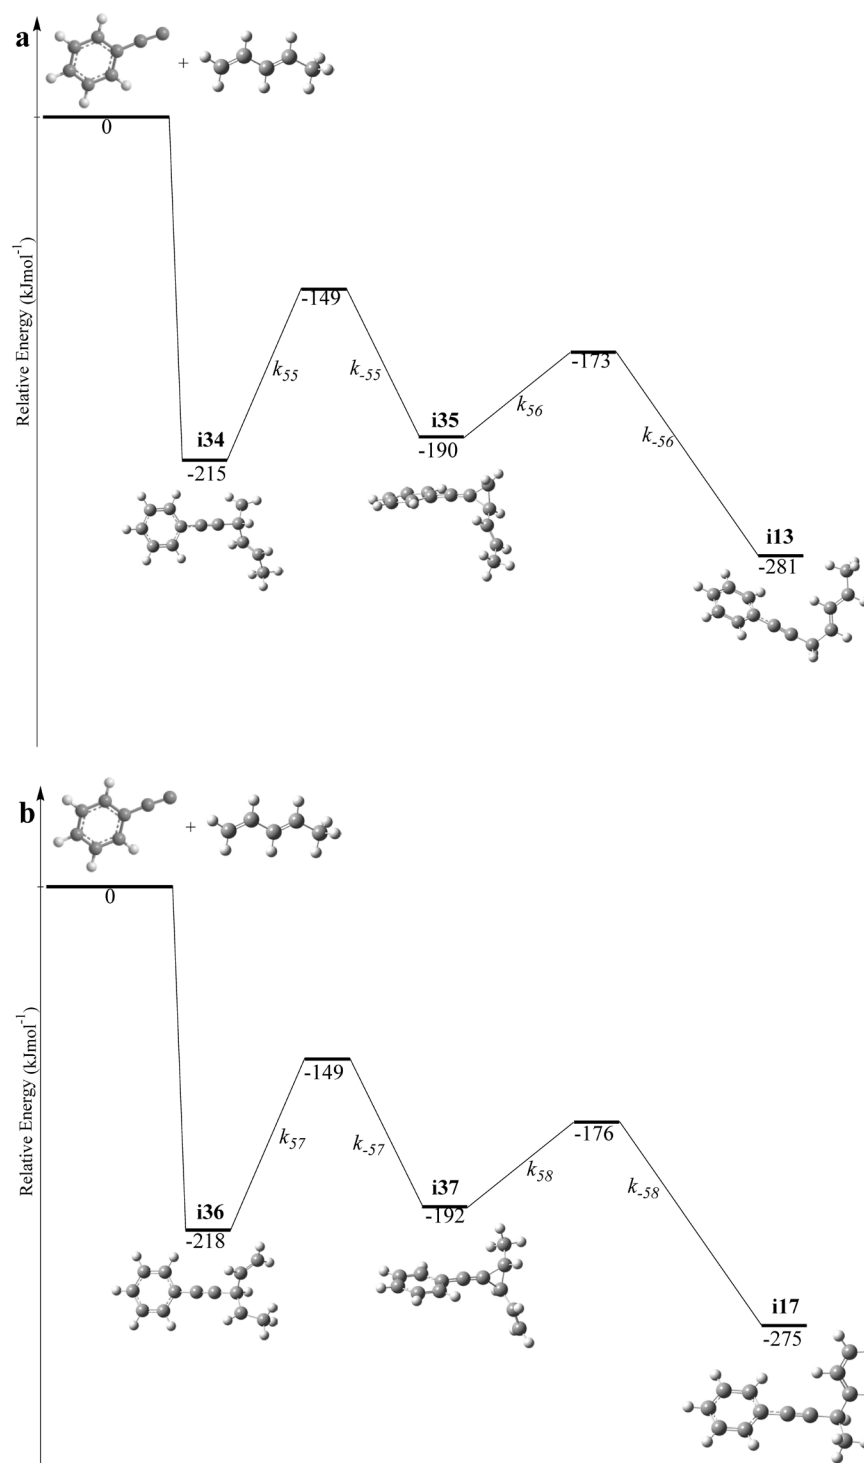

**Fig. S9** Schematic potential energy surface for the reaction of phenylethynyl ( $C_6H_5CC$ ) with 1,3-pentadiene ( $CH_2CHCHCH_3$ ) calculated at the CCSD(T)/cc-pVTZ//wB97X-D/cc-pVTZ level for phenylethynyl addition to the C2 (a) and C3 (b) carbons of 1,3-pentadiene. Carbons are colored as gray and hydrogens are white.

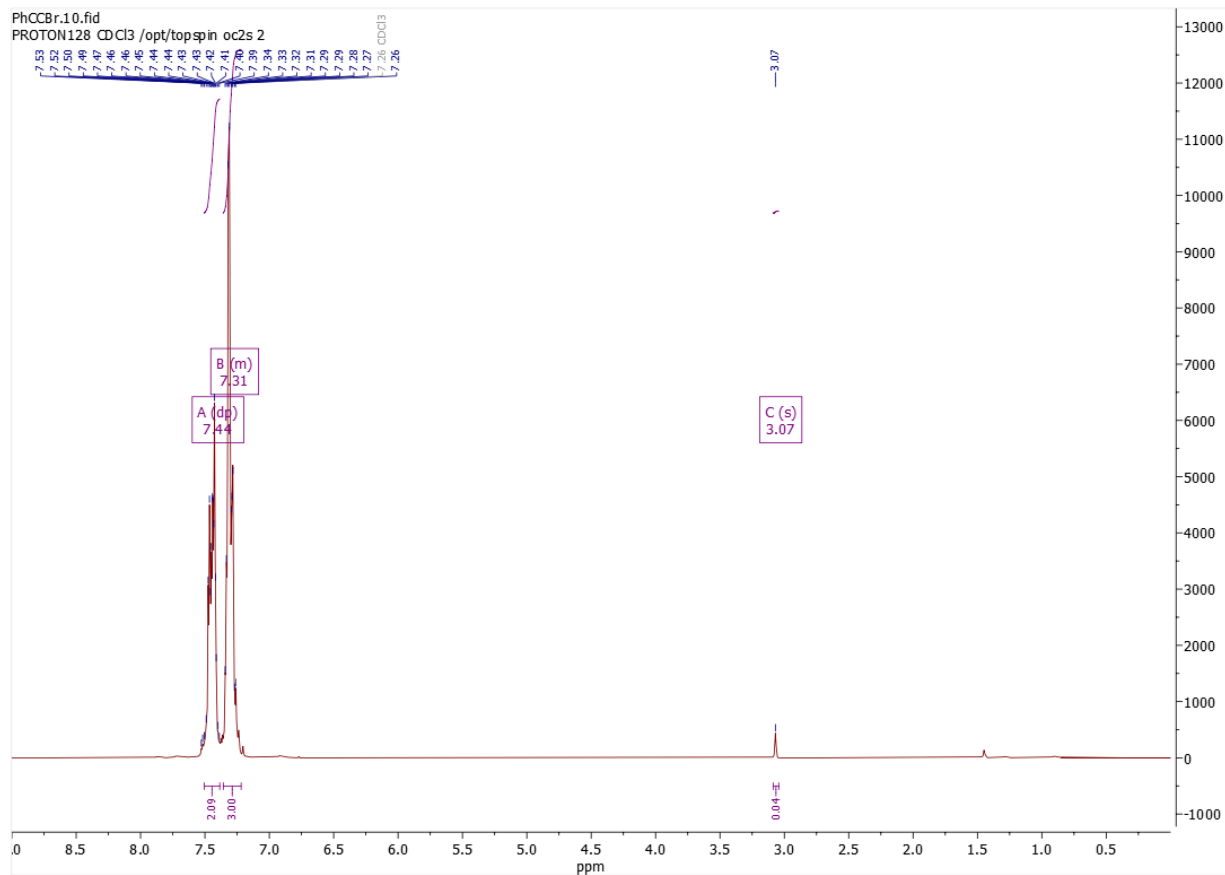

**Fig. S10**  $^1\text{H}$  NMR spectrum of (2-bromoethynyl)benzene. A small impurity of phenylacetylene is still observed at 3.07 ppm and was later removed by distillation.

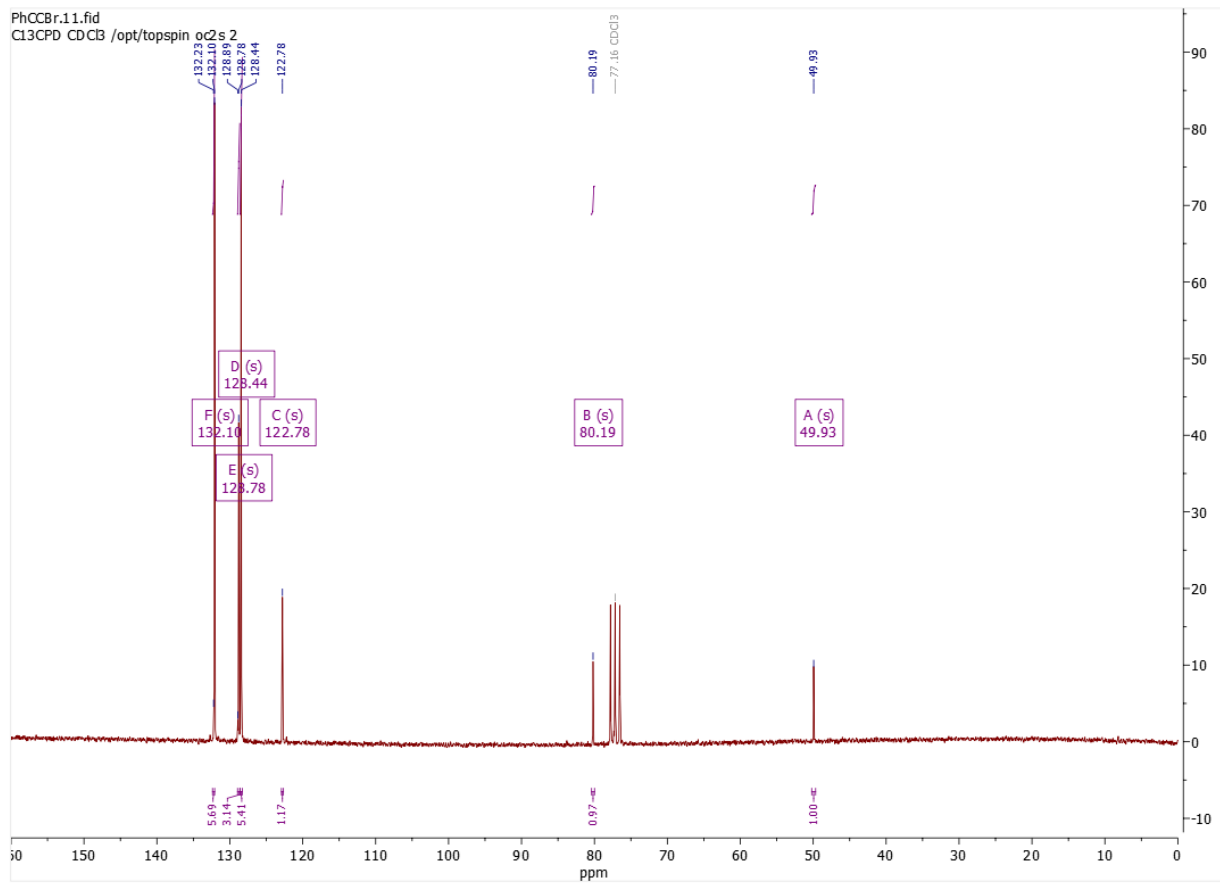

**Fig. S11**  $^{13}\text{C}$  NMR spectrum of (2-bromoethynyl)benzene.

## Supplementary References

- 1 M. V. Russo, C. Lo Sterzo, P. Franceschini, G. Biagini and A. Furlani, Synthesis of highly ethynylated mono and dinuclear Pt(II) tethers bearing the 4,4'-bis(ethynyl)biphenyl (debp) unit as central core, *J. Organomet. Chem.*, 2001, **619**, 49-61.
- 2 M. X.-W. Jiang, M. Rawat and W. D. Wulff, Contingency and serendipity in the reactions of Fischer carbene complexes with conjugated triynes, *J. Am. Chem. Soc.*, 2004, **126**, 5970-5971.
